# Supplementary material
Source: Research Square preprint supplement (doi:10.21203/rs.3.rs-9489991/v1)
Supplement: Supplementary file 1 [file ab97a1be6dbb9b072d24678f.xlsx]

## Sheet: Table 1
Table 1. Positive ligands
Breast cancer				Colorectal cancer				Glioblastoma				Leukemia				Lung cancer				Melanoma				Ovarian cancer				Pancreatic cancer
Name	Source	Count		Name	Source	Count		Name	Source	Count		Name	Source	Count		Name	Source	Count		Name	Source	Count		Name	Source	Count		Name	Source	Count
ADM	TICCom_scRNA-seq	1		ADGRE5	TICCom_bulk_RNA-seq	1		ADAM28	TICCom_scRNA-seq	1		ADGRE5	TICCom_bulk_RNA-seq,TICCom_scRNA-seq	2		ADAM9	TICCom_bulk_RNA-seq,TICCom_scRNA-seq	2		A2M	TICCom_bulk_RNA-seq,TICCom_scRNA-seq	2		A2M	TICCom_bulk_RNA-seq,TICCom_scRNA-seq	2		ACE	TICCom_scRNA-seq	1
ANGPTL2	TICCom_bulk_RNA-seq,TICCom_scRNA-seq	2		B2M	TICCom_bulk_RNA-seq	1		ADM	TICCom_scRNA-seq	1		ANGPT1	TICCom_scRNA-seq	1		ADGRE5	TICCom_bulk_RNA-seq,TICCom_scRNA-seq	2		ADM	TICCom_scRNA-seq	1		ADAM12	TICCom_scRNA-seq	1		ADAM28	TICCom_scRNA-seq	1
ANGPTL4	TICCom_scRNA-seq	1		CCL5	CCIDB	1		ANGPTL4	TICCom_scRNA-seq	1		ANGPT2	TICCom_scRNA-seq	1		ANXA1	TICCom_scRNA-seq	1		ALCAM	TICCom_scRNA-seq	1		ADAM28	TICCom_scRNA-seq	1		ADM	TICCom_scRNA-seq	1
ANXA1	TICCom_scRNA-seq	1		CD55	TICCom_bulk_RNA-seq	1		ANXA1	TICCom_scRNA-seq	1		B2M	TICCom_bulk_RNA-seq,TICCom_scRNA-seq	2		APP	TICCom_bulk_RNA-seq,TICCom_scRNA-seq	2		ANGPT2	TICCom_scRNA-seq	1		ADAM9	TICCom_bulk_RNA-seq,TICCom_scRNA-seq	2		AGT	TICCom_scRNA-seq	1
BGN	TICCom_scRNA-seq	1		COL1A1	TICCom_bulk_RNA-seq	1		APOE	TICCom_bulk_RNA-seq,TICCom_scRNA-seq	2		BTLA	TICCom_bulk_RNA-seq,TICCom_scRNA-seq	2		B2M	TICCom_bulk_RNA-seq,TICCom_scRNA-seq	2		ANXA1	TICCom_scRNA-seq	1		ADCYAP1	TICCom_scRNA-seq	1		ANGPTL1	TICCom_scRNA-seq	1
BTLA	TICCom_scRNA-seq	1		COL1A2	TICCom_bulk_RNA-seq	1		BCAN	TICCom_bulk_RNA-seq,TICCom_scRNA-seq	2		CCL5	TICCom_scRNA-seq	1		CD14	TICCom_bulk_RNA-seq,TICCom_scRNA-seq	2		APOC2	TICCom_scRNA-seq	1		ADGRE5	TICCom_bulk_RNA-seq	1		ANGPTL4	TICCom_bulk_RNA-seq,TICCom_scRNA-seq	2
C1QA	TICCom_bulk_RNA-seq,TICCom_scRNA-seq	2		COL4A1	TICCom_bulk_RNA-seq	1		BMP1	TICCom_scRNA-seq	1		CD14	TICCom_scRNA-seq	1		CD55	TICCom_bulk_RNA-seq,TICCom_scRNA-seq	2		APOE	TICCom_bulk_RNA-seq,TICCom_scRNA-seq	2		ADM	TICCom_scRNA-seq	1		APOA1	TICCom_scRNA-seq	1
C3	TICCom_bulk_RNA-seq,TICCom_scRNA-seq	2		COL4A2	TICCom_bulk_RNA-seq	1		BMP8A	TICCom_scRNA-seq	1		CD160	TICCom_scRNA-seq	1		FAM3C	TICCom_bulk_RNA-seq,TICCom_scRNA-seq	2		B2M	TICCom_bulk_RNA-seq,TICCom_scRNA-seq	2		AGRN	TICCom_bulk_RNA-seq,TICCom_scRNA-seq	2		APOA4	TICCom_scRNA-seq	1
CCL18	TICCom_scRNA-seq	1		COL6A1	TICCom_bulk_RNA-seq	1		C3	TICCom_bulk_RNA-seq,TICCom_scRNA-seq	2		CD40LG	TICCom_scRNA-seq	1		GRN	TICCom_bulk_RNA-seq,TICCom_scRNA-seq	2		BCAN	TICCom_scRNA-seq	1		ALCAM	TICCom_scRNA-seq	1		APOB	TICCom_scRNA-seq	1
CCL19	TICCom_scRNA-seq	1		COL6A2	TICCom_bulk_RNA-seq	1		C4A	TICCom_scRNA-seq	1		CD55	TICCom_bulk_RNA-seq,TICCom_scRNA-seq	2		HBEGF	TICCom_bulk_RNA-seq,TICCom_scRNA-seq	2		BMP1	TICCom_scRNA-seq	1		ANGPT2	TICCom_scRNA-seq	1		APOC2	TICCom_scRNA-seq	1
CCL2	CCIDB,TICCom_scRNA-seq	2		COL6A3	TICCom_bulk_RNA-seq	1		CCL2	TICCom_scRNA-seq	1		CFH	TICCom_scRNA-seq	1		HMGB1	TICCom_bulk_RNA-seq,TICCom_scRNA-seq	2		BMP8B	TICCom_scRNA-seq	1		ANGPTL1	TICCom_scRNA-seq	1		APOD	TICCom_scRNA-seq	1
CCL21	TICCom_scRNA-seq	1		CXCL13	CCIDB	1		CCL3	TICCom_scRNA-seq	1		COL4A4	TICCom_scRNA-seq	1		IL1B	TICCom_scRNA-seq	1		C1QA	TICCom_scRNA-seq	1		ANGPTL2	TICCom_scRNA-seq	1		APOE	TICCom_bulk_RNA-seq,TICCom_scRNA-seq	2
CCL3	TICCom_scRNA-seq	1		FN1	TICCom_bulk_RNA-seq	1		CD14	TICCom_bulk_RNA-seq,TICCom_scRNA-seq	2		CXCL8	TICCom_scRNA-seq	1		LAMB3	TICCom_bulk_RNA-seq,TICCom_scRNA-seq	2		C1QB	TICCom_bulk_RNA-seq,TICCom_scRNA-seq	2		ANGPTL4	TICCom_scRNA-seq	1		APP	TICCom_bulk_RNA-seq,TICCom_scRNA-seq	2
CCL4	TICCom_scRNA-seq	1		GDF15	TICCom_bulk_RNA-seq	1		CNTN2	TICCom_scRNA-seq	1		EDIL3	TICCom_scRNA-seq	1		LGALS1	TICCom_bulk_RNA-seq,TICCom_scRNA-seq	2		CCL2	TICCom_scRNA-seq	1		ANXA1	TICCom_scRNA-seq	1		BMP2	TICCom_scRNA-seq	1
CCL5	TICCom_scRNA-seq	1		IL10	CCIDB	1		COL18A1	TICCom_bulk_RNA-seq,TICCom_scRNA-seq	2		EFNA4	TICCom_scRNA-seq	1		LGALS9	TICCom_bulk_RNA-seq,TICCom_scRNA-seq	2		CCL22	TICCom_scRNA-seq	1		APLN	TICCom_scRNA-seq	1		BMP4	TICCom_scRNA-seq	1
CCL8	CCIDB,TICCom_scRNA-seq	2		IL17A	CCIDB	1		COL4A1	TICCom_bulk_RNA-seq,TICCom_scRNA-seq	2		F13A1	TICCom_bulk_RNA-seq,TICCom_scRNA-seq	2		MIF	TICCom_bulk_RNA-seq,TICCom_scRNA-seq	2		CCL3	TICCom_scRNA-seq	1		APOA1	TICCom_scRNA-seq	1		BMP8B	TICCom_scRNA-seq	1
CD14	TICCom_bulk_RNA-seq,TICCom_scRNA-seq	2		IL6	CCIDB	1		COL4A2	TICCom_bulk_RNA-seq,TICCom_scRNA-seq	2		F8	TICCom_scRNA-seq	1		NAMPT	TICCom_bulk_RNA-seq,TICCom_scRNA-seq	2		CCL4	TICCom_scRNA-seq	1		APOE	TICCom_bulk_RNA-seq,TICCom_scRNA-seq	2		BTC	TICCom_scRNA-seq	1
COL1A1	TICCom_bulk_RNA-seq,TICCom_scRNA-seq	2		LAMB1	TICCom_bulk_RNA-seq	1		COL6A1	TICCom_bulk_RNA-seq,TICCom_scRNA-seq	2		FAM3C	TICCom_bulk_RNA-seq,TICCom_scRNA-seq	2		PLAU	TICCom_bulk_RNA-seq,TICCom_scRNA-seq	2		CCL5	TICCom_scRNA-seq	1		APP	TICCom_bulk_RNA-seq,TICCom_scRNA-seq	2		BTLA	TICCom_scRNA-seq	1
COL1A2	TICCom_bulk_RNA-seq	1		LAMB2	TICCom_bulk_RNA-seq	1		COL6A2	TICCom_bulk_RNA-seq,TICCom_scRNA-seq	2		FLT3LG	TICCom_scRNA-seq	1		RETN	TICCom_scRNA-seq	1		CCL7	TICCom_scRNA-seq	1		B2M	TICCom_bulk_RNA-seq,TICCom_scRNA-seq	2		C1QA	TICCom_bulk_RNA-seq,TICCom_scRNA-seq	2
CXCL10	TICCom_scRNA-seq	1		LAMC1	TICCom_bulk_RNA-seq	1		CSF1	TICCom_bulk_RNA-seq,TICCom_scRNA-seq	2		GZMA	TICCom_scRNA-seq	1		S100A12	TICCom_scRNA-seq	1		CD14	TICCom_bulk_RNA-seq,TICCom_scRNA-seq	2		BDNF	TICCom_scRNA-seq	1		C3	TICCom_bulk_RNA-seq,TICCom_scRNA-seq	2
CXCL11	TICCom_scRNA-seq	1		LAMC2	TICCom_bulk_RNA-seq	1		CXCL12	TICCom_scRNA-seq	1		GZMB	TICCom_scRNA-seq	1		S100A8	TICCom_bulk_RNA-seq,TICCom_scRNA-seq	2		CD55	TICCom_scRNA-seq	1		BGN	TICCom_scRNA-seq	1		C4BPA	TICCom_scRNA-seq	1
CXCL14	TICCom_bulk_RNA-seq,TICCom_scRNA-seq	2		MDK	TICCom_bulk_RNA-seq	1		DRAXIN	TICCom_scRNA-seq	1		HLA-E	TICCom_scRNA-seq	1		S100A9	TICCom_bulk_RNA-seq,TICCom_scRNA-seq	2		CD6	TICCom_scRNA-seq	1		BMP4	TICCom_scRNA-seq	1		CAMP	TICCom_scRNA-seq	1
CXCL9	TICCom_scRNA-seq	1		MMP1	TICCom_bulk_RNA-seq	1		EDA	TICCom_scRNA-seq	1		HMGB1	TICCom_bulk_RNA-seq,TICCom_scRNA-seq	2		SFTPA1	TICCom_bulk_RNA-seq,TICCom_scRNA-seq	2		COL18A1	TICCom_bulk_RNA-seq,TICCom_scRNA-seq	2		C1QB	TICCom_bulk_RNA-seq,TICCom_scRNA-seq	2		CCL19	TICCom_scRNA-seq	1
EDN1	TICCom_scRNA-seq	1		MMP12	TICCom_bulk_RNA-seq	1		EFEMP1	TICCom_bulk_RNA-seq,TICCom_scRNA-seq	2		IL16	TICCom_scRNA-seq	1		SFTPA2	TICCom_bulk_RNA-seq,TICCom_scRNA-seq	2		COL1A2	TICCom_bulk_RNA-seq,TICCom_scRNA-seq	2		C3	TICCom_bulk_RNA-seq,TICCom_scRNA-seq	2		CCL2	TICCom_scRNA-seq	1
FBN1	TICCom_bulk_RNA-seq	1		PLAU	TICCom_bulk_RNA-seq	1		EFEMP2	TICCom_scRNA-seq	1		IL18	TICCom_scRNA-seq	1		SPINT1	TICCom_bulk_RNA-seq,TICCom_scRNA-seq	2		COL4A2	TICCom_bulk_RNA-seq,TICCom_scRNA-seq	2		CCL2	TICCom_scRNA-seq	1		CCL20	CCIDB,TICCom_scRNA-seq	2
FGF1	TICCom_scRNA-seq	1		SPP1	TICCom_bulk_RNA-seq	1		EFNA1	TICCom_scRNA-seq	1		IL1B	TICCom_scRNA-seq	1		SPP1	TICCom_bulk_RNA-seq,TICCom_scRNA-seq	2		COL6A1	TICCom_bulk_RNA-seq,TICCom_scRNA-seq	2		CCL20	TICCom_scRNA-seq	1		CCL22	TICCom_scRNA-seq	1
FGF7	TICCom_scRNA-seq	1		TGFB1	CCIDB,TICCom_bulk_RNA-seq	2		EREG	TICCom_scRNA-seq	1		INHBA	TICCom_scRNA-seq	1		TGFB1	TICCom_bulk_RNA-seq,TICCom_scRNA-seq	2		COL6A2	TICCom_bulk_RNA-seq,TICCom_scRNA-seq	2		CCL28	TICCom_scRNA-seq	1		CCL28	TICCom_scRNA-seq	1
FN1	TICCom_bulk_RNA-seq,TICCom_scRNA-seq	2		TGM2	TICCom_bulk_RNA-seq	1		FGF2	TICCom_scRNA-seq	1		LGALS1	TICCom_bulk_RNA-seq,TICCom_scRNA-seq	2		TGM2	TICCom_bulk_RNA-seq,TICCom_scRNA-seq	2		COL6A3	TICCom_scRNA-seq	1		CCL5	TICCom_scRNA-seq	1		CCL4	TICCom_scRNA-seq	1
HGF	TICCom_scRNA-seq	1		THBS1	TICCom_bulk_RNA-seq	1		FGF20	TICCom_scRNA-seq	1		LYZ	TICCom_bulk_RNA-seq,TICCom_scRNA-seq	2		THBS1	TICCom_bulk_RNA-seq,TICCom_scRNA-seq	2		COL9A3	TICCom_scRNA-seq	1		CCN1	TICCom_bulk_RNA-seq	1		CCL5	TICCom_bulk_RNA-seq,TICCom_scRNA-seq	2
IGHG1	TICCom_scRNA-seq	1		TIMP2	TICCom_bulk_RNA-seq	1		FGL1	TICCom_scRNA-seq	1		NAMPT	TICCom_scRNA-seq	1		TIMP1	TICCom_bulk_RNA-seq,TICCom_scRNA-seq	2		CXCL2	TICCom_scRNA-seq	1		CCN2	TICCom_bulk_RNA-seq	1		CD14	TICCom_scRNA-seq	1
IGLC1	TICCom_scRNA-seq	1		TNFSF10	TICCom_bulk_RNA-seq	1		FN1	TICCom_bulk_RNA-seq,TICCom_scRNA-seq	2		NCAM1	TICCom_scRNA-seq	1		TIMP2	TICCom_bulk_RNA-seq,TICCom_scRNA-seq	2		CXCL3	TICCom_scRNA-seq	1		CD14	TICCom_bulk_RNA-seq,TICCom_scRNA-seq	2		CD55	TICCom_scRNA-seq	1
IL18	TICCom_scRNA-seq	1		CD99	TICCom_bulk_RNA-seq	1		GDF15	TICCom_scRNA-seq	1		S100A12	TICCom_scRNA-seq	1		VCAN	TICCom_bulk_RNA-seq,TICCom_scRNA-seq	2		EREG	TICCom_scRNA-seq	1		CD55	TICCom_bulk_RNA-seq,TICCom_scRNA-seq	2		CEL	TICCom_scRNA-seq	1
IL1B	CCIDB	1		CEACAM1	TICCom_bulk_RNA-seq	1		GRN	TICCom_bulk_RNA-seq,TICCom_scRNA-seq	2		S100A4	TICCom_scRNA-seq	1		VEGFA	TICCom_bulk_RNA-seq,TICCom_scRNA-seq	2		F13A1	TICCom_scRNA-seq	1		CD6	TICCom_scRNA-seq	1		CFH	TICCom_scRNA-seq	1
LGALS3BP	TICCom_scRNA-seq	1		CEACAM5	TICCom_bulk_RNA-seq	1		HBEGF	TICCom_scRNA-seq	1		S100A8	TICCom_bulk_RNA-seq,TICCom_scRNA-seq	2		ADAM10	TICCom_bulk_RNA-seq,TICCom_scRNA-seq	2		FGF2	TICCom_scRNA-seq	1		CFH	TICCom_scRNA-seq	1		CLEC11A	TICCom_scRNA-seq	1
LY86	TICCom_scRNA-seq	1		CTSK	CCIDB	1		HSPG2	TICCom_bulk_RNA-seq,TICCom_scRNA-seq	2		S100A9	TICCom_bulk_RNA-seq,TICCom_scRNA-seq	2		ADAM15	TICCom_bulk_RNA-seq,TICCom_scRNA-seq	2		FN1	TICCom_bulk_RNA-seq,TICCom_scRNA-seq	2		COL11A1	TICCom_scRNA-seq	1		COL11A1	TICCom_bulk_RNA-seq,TICCom_scRNA-seq	2
MFGE8	TICCom_bulk_RNA-seq	1		PECAM1	TICCom_bulk_RNA-seq	1		IGF1	TICCom_scRNA-seq	1		TIMP1	TICCom_bulk_RNA-seq,TICCom_scRNA-seq	2		ADAM17	TICCom_bulk_RNA-seq,TICCom_scRNA-seq	2		GDF1	TICCom_scRNA-seq	1		COL14A1	TICCom_scRNA-seq	1		COL18A1	TICCom_bulk_RNA-seq,TICCom_scRNA-seq	2
MMP2	TICCom_bulk_RNA-seq,TICCom_scRNA-seq	2						IL16	TICCom_scRNA-seq	1		TNFSF10	TICCom_scRNA-seq	1		ALOX5AP	TICCom_bulk_RNA-seq,TICCom_scRNA-seq	2		GDF15	TICCom_bulk_RNA-seq,TICCom_scRNA-seq	2		COL16A1	TICCom_scRNA-seq	1		COL1A1	TICCom_bulk_RNA-seq,TICCom_scRNA-seq	2
MMP9	TICCom_scRNA-seq	1						IL18	TICCom_scRNA-seq	1		TNFSF13	TICCom_scRNA-seq	1		CD99	TICCom_bulk_RNA-seq,TICCom_scRNA-seq	2		GRN	TICCom_bulk_RNA-seq,TICCom_scRNA-seq	2		COL18A1	TICCom_bulk_RNA-seq,TICCom_scRNA-seq	2		COL1A2	TICCom_bulk_RNA-seq,TICCom_scRNA-seq	2
NCAM1	TICCom_scRNA-seq	1						IL34	TICCom_scRNA-seq	1		TNFSF13B	TICCom_bulk_RNA-seq,TICCom_scRNA-seq	2		F11R	TICCom_bulk_RNA-seq,TICCom_scRNA-seq	2		GZMA	TICCom_scRNA-seq	1		COL1A1	TICCom_bulk_RNA-seq,TICCom_scRNA-seq	2		COL3A1	TICCom_bulk_RNA-seq,TICCom_scRNA-seq	2
PGF	TICCom_scRNA-seq	1						INHA	TICCom_scRNA-seq	1		VCAN	TICCom_scRNA-seq	1		HLA-A	TICCom_bulk_RNA-seq,TICCom_scRNA-seq	2		GZMB	TICCom_scRNA-seq	1		COL1A2	TICCom_bulk_RNA-seq,TICCom_scRNA-seq	2		COL4A1	TICCom_bulk_RNA-seq,TICCom_scRNA-seq	2
PLAU	TICCom_bulk_RNA-seq,TICCom_scRNA-seq	2						LAMA2	TICCom_scRNA-seq	1		ADAM10	TICCom_bulk_RNA-seq,TICCom_scRNA-seq	2		HLA-B	TICCom_bulk_RNA-seq,TICCom_scRNA-seq	2		HBEGF	TICCom_scRNA-seq	1		COL3A1	TICCom_bulk_RNA-seq,TICCom_scRNA-seq	2		COL4A2	TICCom_bulk_RNA-seq,TICCom_scRNA-seq	2
PTN	TICCom_scRNA-seq	1						LAMA4	TICCom_scRNA-seq	1		CADM1	TICCom_scRNA-seq	1		HLA-C	TICCom_scRNA-seq	1		HLA-E	TICCom_scRNA-seq	1		COL4A1	TICCom_bulk_RNA-seq,TICCom_scRNA-seq	2		COL4A4	TICCom_scRNA-seq	1
S100A8	TICCom_scRNA-seq	1						LGALS1	TICCom_scRNA-seq	1		CD200	TICCom_scRNA-seq	1		HLA-F	TICCom_scRNA-seq	1		IGF1	TICCom_scRNA-seq	1		COL4A2	TICCom_bulk_RNA-seq,TICCom_scRNA-seq	2		COL5A1	TICCom_bulk_RNA-seq,TICCom_scRNA-seq	2
S100A9	TICCom_scRNA-seq	1						LGALS3BP	TICCom_scRNA-seq	1		CD34	TICCom_scRNA-seq	1		ICAM1	TICCom_bulk_RNA-seq,TICCom_scRNA-seq	2		IGFBP4	TICCom_scRNA-seq	1		COL5A1	TICCom_bulk_RNA-seq,TICCom_scRNA-seq	2		COL5A2	TICCom_bulk_RNA-seq,TICCom_scRNA-seq	2
SLPI	TICCom_scRNA-seq	1						LGALS9	TICCom_scRNA-seq	1		CD52	TICCom_bulk_RNA-seq,TICCom_scRNA-seq	2		ICAM3	TICCom_scRNA-seq	1		IL10	TICCom_scRNA-seq	1		COL5A2	TICCom_scRNA-seq	1		COL6A1	TICCom_bulk_RNA-seq,TICCom_scRNA-seq	2
SPP1	TICCom_bulk_RNA-seq,TICCom_scRNA-seq	2						LPL	TICCom_bulk_RNA-seq,TICCom_scRNA-seq	2		CD58	TICCom_scRNA-seq	1		ITGAM	TICCom_scRNA-seq	1		IL16	TICCom_scRNA-seq	1		COL6A1	TICCom_bulk_RNA-seq,TICCom_scRNA-seq	2		COL6A2	TICCom_bulk_RNA-seq,TICCom_scRNA-seq	2
THBS1	TICCom_scRNA-seq	1						LTA	TICCom_scRNA-seq	1		CD69	TICCom_scRNA-seq	1		ITGB2	TICCom_bulk_RNA-seq,TICCom_scRNA-seq	2		IL18	TICCom_scRNA-seq	1		COL6A2	TICCom_bulk_RNA-seq,TICCom_scRNA-seq	2		COL6A3	TICCom_bulk_RNA-seq,TICCom_scRNA-seq	2
THBS2	TICCom_scRNA-seq	1						NCAN	TICCom_bulk_RNA-seq,TICCom_scRNA-seq	2		CDH1	TICCom_scRNA-seq	1		LILRB2	CCIDB	1		IL1B	TICCom_scRNA-seq	1		COL6A3	TICCom_scRNA-seq	1		COL8A1	TICCom_bulk_RNA-seq,TICCom_scRNA-seq	2
TNFSF10	TICCom_scRNA-seq	1						NID1	TICCom_scRNA-seq	1		CDH4	TICCom_scRNA-seq	1		LILRB4	TICCom_scRNA-seq	1		IL1RN	TICCom_scRNA-seq	1		COL7A1	TICCom_scRNA-seq	1		COL9A3	TICCom_scRNA-seq	1
TNFSF13	TICCom_bulk_RNA-seq,TICCom_scRNA-seq	2						NXPH1	TICCom_scRNA-seq	1		ENTPD1	TICCom_scRNA-seq	1		LMAN1	TICCom_bulk_RNA-seq,TICCom_scRNA-seq	2		LAMA4	TICCom_scRNA-seq	1		COL8A1	TICCom_scRNA-seq	1		COMP	TICCom_bulk_RNA-seq,TICCom_scRNA-seq	2
TNFSF13B	TICCom_scRNA-seq	1						PLAT	TICCom_scRNA-seq	1		HLA-DPA1	TICCom_bulk_RNA-seq,TICCom_scRNA-seq	2		MPZL1	TICCom_bulk_RNA-seq,TICCom_scRNA-seq	2		LAMB2	TICCom_bulk_RNA-seq,TICCom_scRNA-seq	2		COL9A2	TICCom_bulk_RNA-seq,TICCom_scRNA-seq	2		CP	TICCom_scRNA-seq	1
VCAM1	TICCom_scRNA-seq	1						POSTN	TICCom_scRNA-seq	1		HLA-DRA	TICCom_bulk_RNA-seq,TICCom_scRNA-seq	2		MRC1	TICCom_scRNA-seq	1		LGALS1	TICCom_scRNA-seq	1		COMP	TICCom_scRNA-seq	1		CPAMD8	TICCom_scRNA-seq	1
ZG16B	TICCom_bulk_RNA-seq,TICCom_scRNA-seq	2						PROS1	TICCom_bulk_RNA-seq,TICCom_scRNA-seq	2		HLA-DRB1	TICCom_bulk_RNA-seq,TICCom_scRNA-seq	2		PSEN1	TICCom_bulk_RNA-seq,TICCom_scRNA-seq	2		LGALS9	TICCom_scRNA-seq	1		CP	TICCom_bulk_RNA-seq,TICCom_scRNA-seq	2		CSF1	TICCom_bulk_RNA-seq,TICCom_scRNA-seq	2
ADA	TICCom_scRNA-seq	1						RARRES2	TICCom_scRNA-seq	1		LMAN1	TICCom_bulk_RNA-seq,TICCom_scRNA-seq	2		PTDSS1	TICCom_scRNA-seq	1		LPL	TICCom_scRNA-seq	1		CRLF1	TICCom_scRNA-seq	1		CTHRC1	TICCom_bulk_RNA-seq,TICCom_scRNA-seq	2
CD200	TICCom_scRNA-seq	1						S100B	TICCom_scRNA-seq	1		PECAM1	TICCom_bulk_RNA-seq,TICCom_scRNA-seq	2		PTPRC	TICCom_scRNA-seq	1		LY86	TICCom_scRNA-seq	1		CTHRC1	TICCom_scRNA-seq	1		CXCL1	TICCom_scRNA-seq	1
CD58	TICCom_scRNA-seq	1						SERPINE1	TICCom_scRNA-seq	1		RGMB	TICCom_scRNA-seq	1		TYROBP	TICCom_scRNA-seq	1		LYZ	TICCom_scRNA-seq	1		CXCL1	TICCom_scRNA-seq	1		CXCL12	CCIDB,TICCom_scRNA-seq	2
HAS2	TICCom_scRNA-seq	1						SLIT1	TICCom_scRNA-seq	1		SELL	TICCom_scRNA-seq	1						MDK	TICCom_bulk_RNA-seq,TICCom_scRNA-seq	2		CXCL10	TICCom_bulk_RNA-seq,TICCom_scRNA-seq	2		CXCL14	TICCom_bulk_RNA-seq,TICCom_scRNA-seq	2
HLA-DMB	TICCom_bulk_RNA-seq	1						SLIT2	TICCom_scRNA-seq	1		SEMA4D	TICCom_bulk_RNA-seq,TICCom_scRNA-seq	2						MMP9	TICCom_scRNA-seq	1		CXCL12	TICCom_scRNA-seq	1		CXCL17	TICCom_scRNA-seq	1
HLA-DPA1	TICCom_bulk_RNA-seq	1						SLIT3	TICCom_scRNA-seq	1										MYOC	TICCom_scRNA-seq	1		CXCL14	TICCom_scRNA-seq	1		CXCL2	TICCom_scRNA-seq	1
HLA-DPB1	TICCom_bulk_RNA-seq	1						SPP1	TICCom_bulk_RNA-seq,TICCom_scRNA-seq	2										NAMPT	TICCom_scRNA-seq	1		CXCL16	TICCom_scRNA-seq	1		CXCL3	TICCom_scRNA-seq	1
HLA-DQA1	TICCom_bulk_RNA-seq	1						ST6GAL1	TICCom_scRNA-seq	1										PGF	TICCom_scRNA-seq	1		CXCL2	TICCom_scRNA-seq	1		CXCL5	TICCom_scRNA-seq	1
HLA-DQB1	TICCom_bulk_RNA-seq	1						TGFB1	TICCom_bulk_RNA-seq,TICCom_scRNA-seq	2										PLAU	TICCom_scRNA-seq	1		CXCL3	TICCom_scRNA-seq	1		DCN	TICCom_bulk_RNA-seq,TICCom_scRNA-seq	2
HLA-DRA	TICCom_bulk_RNA-seq,TICCom_scRNA-seq	2						TGFB2	TICCom_scRNA-seq	1										PLTP	TICCom_scRNA-seq	1		CXCL6	TICCom_scRNA-seq	1		DEFB1	TICCom_scRNA-seq	1
HLA-DRB5	TICCom_bulk_RNA-seq	1						TGFB3	TICCom_scRNA-seq	1										POSTN	TICCom_scRNA-seq	1		CXCL8	TICCom_bulk_RNA-seq	1		DKK1	TICCom_bulk_RNA-seq,TICCom_scRNA-seq	2
HLA-F	TICCom_scRNA-seq	1						THBS4	TICCom_scRNA-seq	1										PROS1	TICCom_scRNA-seq	1		CXCL9	TICCom_scRNA-seq	1		EDIL3	TICCom_bulk_RNA-seq,TICCom_scRNA-seq	2
ICAM1	TICCom_scRNA-seq	1						TIMP3	TICCom_bulk_RNA-seq,TICCom_scRNA-seq	2										PTN	TICCom_scRNA-seq	1		DCN	TICCom_scRNA-seq	1		EDN1	TICCom_scRNA-seq	1
ITGB2	TICCom_scRNA-seq	1						TNC	TICCom_bulk_RNA-seq,TICCom_scRNA-seq	2										PVR	TICCom_scRNA-seq	1		DEFB1	TICCom_scRNA-seq	1		EFEMP1	TICCom_bulk_RNA-seq,TICCom_scRNA-seq	2
THY1	CCIDB,TICCom_scRNA-seq	2						TNFSF10	TICCom_scRNA-seq	1										S100A12	TICCom_scRNA-seq	1		DKK1	TICCom_scRNA-seq	1		EFEMP2	TICCom_bulk_RNA-seq,TICCom_scRNA-seq	2
								TNR	TICCom_scRNA-seq	1										S100A4	TICCom_scRNA-seq	1		DKK3	TICCom_scRNA-seq	1		EFNA1	TICCom_bulk_RNA-seq,TICCom_scRNA-seq	2
								VCAM1	TICCom_scRNA-seq	1										S100A8	TICCom_scRNA-seq	1		EBI3	TICCom_scRNA-seq	1		EREG	TICCom_scRNA-seq	1
								VCAN	TICCom_bulk_RNA-seq,TICCom_scRNA-seq	2										S100A9	TICCom_scRNA-seq	1		EDIL3	TICCom_scRNA-seq	1		F10	TICCom_scRNA-seq	1
								VEGFA	TICCom_scRNA-seq	1										S100B	TICCom_scRNA-seq	1		EDN1	TICCom_scRNA-seq	1		F12	TICCom_scRNA-seq	1
								WNT2B	TICCom_scRNA-seq	1										SERPINA1	TICCom_scRNA-seq	1		EFEMP2	TICCom_scRNA-seq	1		F8	TICCom_scRNA-seq	1
								CDH2	TICCom_bulk_RNA-seq,TICCom_scRNA-seq	2										SERPINE1	TICCom_scRNA-seq	1		EFNA1	TICCom_scRNA-seq	1		FASLG	TICCom_scRNA-seq	1
								CDH4	TICCom_scRNA-seq	1										SERPINE2	TICCom_bulk_RNA-seq,TICCom_scRNA-seq	2		F13A1	TICCom_scRNA-seq	1		FBN1	TICCom_bulk_RNA-seq,TICCom_scRNA-seq	2
								CDH5	TICCom_scRNA-seq	1										SERPING1	TICCom_bulk_RNA-seq,TICCom_scRNA-seq	2		FAM3C	TICCom_bulk_RNA-seq,TICCom_scRNA-seq	2		FGF18	TICCom_scRNA-seq	1
								DLL1	TICCom_bulk_RNA-seq,TICCom_scRNA-seq	2										SPON2	TICCom_scRNA-seq	1		FBLN1	TICCom_bulk_RNA-seq,TICCom_scRNA-seq	2		FGF2	TICCom_scRNA-seq	1
								DLL3	TICCom_bulk_RNA-seq,TICCom_scRNA-seq	2										SPP1	TICCom_scRNA-seq	1		FBN1	TICCom_scRNA-seq	1		FGF7	TICCom_scRNA-seq	1
								DSCAM	TICCom_scRNA-seq	1										ST6GAL1	TICCom_scRNA-seq	1		FGF1	TICCom_scRNA-seq	1		FN1	TICCom_bulk_RNA-seq,TICCom_scRNA-seq	2
								EGF	TICCom_scRNA-seq	1										TF	TICCom_scRNA-seq	1		FGF7	TICCom_scRNA-seq	1		FST	TICCom_scRNA-seq	1
								HAS2	TICCom_scRNA-seq	1										THBS1	TICCom_scRNA-seq	1		FN1	TICCom_bulk_RNA-seq,TICCom_scRNA-seq	2		GAS6	CCIDB,TICCom_bulk_RNA-seq,TICCom_scRNA-seq	3
								HLA-C	TICCom_scRNA-seq	1										THBS2	TICCom_scRNA-seq	1		GAL	TICCom_scRNA-seq	1		GDF15	TICCom_bulk_RNA-seq,TICCom_scRNA-seq	2
								HLA-DMB	TICCom_scRNA-seq	1										TIMP1	TICCom_bulk_RNA-seq,TICCom_scRNA-seq	2		GAS6	TICCom_scRNA-seq	1		GZMA	TICCom_scRNA-seq	1
								HLA-DOA	TICCom_scRNA-seq	1										TIMP3	TICCom_scRNA-seq	1		GDF15	TICCom_bulk_RNA-seq,TICCom_scRNA-seq	2		GZMB	TICCom_scRNA-seq	1
								HLA-DPB1	TICCom_bulk_RNA-seq,TICCom_scRNA-seq	2										TNFSF10	TICCom_scRNA-seq	1		GDNF	TICCom_scRNA-seq	1		HBEGF	TICCom_scRNA-seq	1
								HLA-DRA	TICCom_bulk_RNA-seq,TICCom_scRNA-seq	2										TNFSF13	TICCom_scRNA-seq	1		GRN	TICCom_bulk_RNA-seq,TICCom_scRNA-seq	2		HGF	TICCom_scRNA-seq	1
								HLA-DRB1	TICCom_bulk_RNA-seq,TICCom_scRNA-seq	2										TNFSF13B	TICCom_scRNA-seq	1		GZMA	TICCom_scRNA-seq	1		HP	TICCom_scRNA-seq	1
								HLA-DRB5	TICCom_scRNA-seq	1										VCAM1	TICCom_scRNA-seq	1		GZMB	TICCom_scRNA-seq	1		HSPG2	TICCom_bulk_RNA-seq,TICCom_scRNA-seq	2
								ICAM1	TICCom_scRNA-seq	1										VCAN	TICCom_scRNA-seq	1		HBEGF	TICCom_bulk_RNA-seq,TICCom_scRNA-seq	2		IGF1	TICCom_scRNA-seq	1
								ITGA4	TICCom_scRNA-seq	1										VEGFA	TICCom_scRNA-seq	1		HGF	TICCom_scRNA-seq	1		IGF2	TICCom_scRNA-seq	1
								ITGA9	TICCom_scRNA-seq	1										ADAM17	TICCom_scRNA-seq	1		HLA-E	TICCom_scRNA-seq	1		IGFBP4	TICCom_scRNA-seq	1
								ITGAL	TICCom_scRNA-seq	1										ALOX5AP	TICCom_scRNA-seq	1		HP	TICCom_scRNA-seq	1		IL1B	CCIDB,TICCom_scRNA-seq	2
								ITGAM	TICCom_scRNA-seq	1										CADM1	TICCom_scRNA-seq	1		HSPG2	TICCom_bulk_RNA-seq,TICCom_scRNA-seq	2		IL1RN	TICCom_scRNA-seq	1
								ITGB2	TICCom_scRNA-seq	1										CD22	TICCom_scRNA-seq	1		IGF1	TICCom_scRNA-seq	1		IL23A	TICCom_scRNA-seq	1
								JAG1	TICCom_bulk_RNA-seq,TICCom_scRNA-seq	2										CD52	TICCom_scRNA-seq	1		IGF2	TICCom_bulk_RNA-seq	1		INHBA	TICCom_bulk_RNA-seq,TICCom_scRNA-seq	2
								JAG2	TICCom_scRNA-seq	1										CD59	TICCom_scRNA-seq	1		IGFL2	TICCom_scRNA-seq	1		LAMA2	TICCom_scRNA-seq	1
								JAM2	TICCom_bulk_RNA-seq,TICCom_scRNA-seq	2										CD69	TICCom_scRNA-seq	1		IL10	TICCom_scRNA-seq	1		LAMA3	TICCom_bulk_RNA-seq,TICCom_scRNA-seq	2
								LILRB4	TICCom_scRNA-seq	1										CD96	TICCom_scRNA-seq	1		IL16	TICCom_scRNA-seq	1		LAMA4	TICCom_bulk_RNA-seq,TICCom_scRNA-seq	2
								LMAN1	TICCom_bulk_RNA-seq,TICCom_scRNA-seq	2										CLDN11	TICCom_scRNA-seq	1		IL18	TICCom_scRNA-seq	1		LAMA5	TICCom_bulk_RNA-seq,TICCom_scRNA-seq	2
								LRIG1	TICCom_bulk_RNA-seq,TICCom_scRNA-seq	2										EFNB1	TICCom_scRNA-seq	1		IL1B	TICCom_bulk_RNA-seq,TICCom_scRNA-seq	2		LAMB1	TICCom_bulk_RNA-seq,TICCom_scRNA-seq	2
								LRRC4C	TICCom_scRNA-seq	1										ENTPD1	TICCom_scRNA-seq	1		IL1RN	TICCom_scRNA-seq	1		LAMB3	TICCom_bulk_RNA-seq,TICCom_scRNA-seq	2
								MPZ	TICCom_scRNA-seq	1										F11R	TICCom_scRNA-seq	1		IL6	CCIDB,TICCom_scRNA-seq	2		LAMC2	TICCom_bulk_RNA-seq,TICCom_scRNA-seq	2
								MPZL1	TICCom_bulk_RNA-seq,TICCom_scRNA-seq	2										HLA-A	TICCom_scRNA-seq	1		IL7	TICCom_scRNA-seq	1		LIF	CCIDB,TICCom_scRNA-seq	2
								MRC1	TICCom_scRNA-seq	1										HLA-B	TICCom_scRNA-seq	1		INHBA	TICCom_scRNA-seq	1		LIPH	TICCom_scRNA-seq	1
								NEGR1	TICCom_scRNA-seq	1										HLA-C	TICCom_scRNA-seq	1		INHBB	TICCom_scRNA-seq	1		LPL	TICCom_scRNA-seq	1
								NLGN1	TICCom_scRNA-seq	1										HLA-DMA	TICCom_bulk_RNA-seq,TICCom_scRNA-seq	2		LAMA2	TICCom_scRNA-seq	1		LTA	TICCom_scRNA-seq	1
								NRXN1	TICCom_scRNA-seq	1										HLA-DMB	TICCom_scRNA-seq	1		LAMA3	TICCom_bulk_RNA-seq,TICCom_scRNA-seq	2		LTBP1	TICCom_bulk_RNA-seq,TICCom_scRNA-seq	2
								NRXN2	TICCom_scRNA-seq	1										HLA-DOA	TICCom_scRNA-seq	1		LAMA4	TICCom_scRNA-seq	1		LTBP3	TICCom_bulk_RNA-seq,TICCom_scRNA-seq	2
								NRXN3	TICCom_scRNA-seq	1										HLA-DPA1	TICCom_bulk_RNA-seq,TICCom_scRNA-seq	2		LAMB1	TICCom_bulk_RNA-seq,TICCom_scRNA-seq	2		LYZ	TICCom_scRNA-seq	1
								PECAM1	TICCom_scRNA-seq	1										HLA-DPB1	TICCom_bulk_RNA-seq,TICCom_scRNA-seq	2		LAMB2	TICCom_bulk_RNA-seq,TICCom_scRNA-seq	2		MDK	TICCom_bulk_RNA-seq,TICCom_scRNA-seq	2
								PTPRC	TICCom_scRNA-seq	1										HLA-DQA1	TICCom_scRNA-seq	1		LAMB3	TICCom_bulk_RNA-seq,TICCom_scRNA-seq	2		MFAP2	TICCom_scRNA-seq	1
								SELPLG	TICCom_scRNA-seq	1										HLA-DQB1	TICCom_bulk_RNA-seq,TICCom_scRNA-seq	2		LAMC2	TICCom_bulk_RNA-seq,TICCom_scRNA-seq	2		MFAP5	TICCom_scRNA-seq	1
								SEMA5A	TICCom_scRNA-seq	1										HLA-DRA	TICCom_scRNA-seq	1		LGALS1	TICCom_bulk_RNA-seq,TICCom_scRNA-seq	2		MFGE8	TICCom_bulk_RNA-seq,TICCom_scRNA-seq	2
								SEMA6D	TICCom_scRNA-seq	1										HLA-DRB1	TICCom_scRNA-seq	1		LGALS3BP	TICCom_bulk_RNA-seq,TICCom_scRNA-seq	2		MMP1	TICCom_bulk_RNA-seq,TICCom_scRNA-seq	2
																				HLA-DRB5	TICCom_bulk_RNA-seq,TICCom_scRNA-seq	2		LGALS9	TICCom_bulk_RNA-seq,TICCom_scRNA-seq	2		MMP2	TICCom_bulk_RNA-seq,TICCom_scRNA-seq	2
																				HLA-F	TICCom_scRNA-seq	1		LPL	TICCom_scRNA-seq	1		MMP7	TICCom_bulk_RNA-seq,TICCom_scRNA-seq	2
																				ICAM2	TICCom_scRNA-seq	1		LTBP1	TICCom_scRNA-seq	1		NAMPT	TICCom_bulk_RNA-seq,TICCom_scRNA-seq	2
																				ICAM3	TICCom_scRNA-seq	1		LTBP3	TICCom_bulk_RNA-seq,TICCom_scRNA-seq	2		NCAM1	TICCom_bulk_RNA-seq,TICCom_scRNA-seq	2
																				ITGA4	TICCom_scRNA-seq	1		LTF	TICCom_scRNA-seq	1		NID1	TICCom_bulk_RNA-seq,TICCom_scRNA-seq	2
																				ITGA9	TICCom_scRNA-seq	1		LUM	TICCom_bulk_RNA-seq,TICCom_scRNA-seq	2		NMU	TICCom_scRNA-seq	1
																				ITGB2	TICCom_scRNA-seq	1		LYZ	TICCom_scRNA-seq	1		NPW	TICCom_scRNA-seq	1
																				ITGB7	TICCom_scRNA-seq	1		MDK	TICCom_bulk_RNA-seq,TICCom_scRNA-seq	2		OSM	TICCom_scRNA-seq	1
																				MICA	TICCom_scRNA-seq	1		MFGE8	TICCom_bulk_RNA-seq,TICCom_scRNA-seq	2		PCSK1N	TICCom_scRNA-seq	1
																				MICB	TICCom_scRNA-seq	1		MMP1	TICCom_bulk_RNA-seq	1		PDGFA	TICCom_scRNA-seq	1
																				MPZL1	TICCom_bulk_RNA-seq,TICCom_scRNA-seq	2		MMP13	TICCom_scRNA-seq	1		PDGFC	TICCom_bulk_RNA-seq,TICCom_scRNA-seq	2
																				PODXL2	TICCom_scRNA-seq	1		MMP2	TICCom_scRNA-seq	1		PDGFD	TICCom_scRNA-seq	1
																				PSEN1	TICCom_scRNA-seq	1		MMP7	TICCom_bulk_RNA-seq,TICCom_scRNA-seq	2		PGF	TICCom_scRNA-seq	1
																				PTPRC	TICCom_scRNA-seq	1		MMP9	TICCom_scRNA-seq	1		PLA2G10	TICCom_scRNA-seq	1
																				SELPLG	TICCom_scRNA-seq	1		NAMPT	TICCom_bulk_RNA-seq,TICCom_scRNA-seq	2		PLAU	TICCom_bulk_RNA-seq,TICCom_scRNA-seq	2
																				SEMA4D	TICCom_scRNA-seq	1		NID1	TICCom_scRNA-seq	1		PLTP	TICCom_bulk_RNA-seq,TICCom_scRNA-seq	2
																				SIGLEC1	TICCom_scRNA-seq	1		NPPC	TICCom_scRNA-seq	1		POSTN	TICCom_bulk_RNA-seq,TICCom_scRNA-seq	2
																				SPN	TICCom_scRNA-seq	1		NPW	TICCom_scRNA-seq	1		PROC	TICCom_scRNA-seq	1
																				TIGIT	TICCom_scRNA-seq	1		NUCB2	TICCom_scRNA-seq	1		PRSS1	TICCom_scRNA-seq	1
																				TYROBP	TICCom_scRNA-seq	1		OSM	TICCom_scRNA-seq	1		PRSS3	TICCom_bulk_RNA-seq,TICCom_scRNA-seq	2
																								PDGFA	TICCom_scRNA-seq	1		PTN	TICCom_scRNA-seq	1
																								PDGFB	TICCom_scRNA-seq	1		RARRES2	TICCom_scRNA-seq	1
																								PENK	TICCom_scRNA-seq	1		RLN2	TICCom_scRNA-seq	1
																								PGF	TICCom_scRNA-seq	1		RSPO3	TICCom_scRNA-seq	1
																								PLAT	TICCom_scRNA-seq	1		S100A12	TICCom_scRNA-seq	1
																								PLAU	TICCom_bulk_RNA-seq,TICCom_scRNA-seq	2		S100A8	TICCom_scRNA-seq	1
																								PLTP	TICCom_scRNA-seq	1		S100A9	TICCom_bulk_RNA-seq,TICCom_scRNA-seq	2
																								POMC	TICCom_scRNA-seq	1		SAA1	TICCom_scRNA-seq	1
																								POSTN	TICCom_scRNA-seq	1		SCGB3A1	TICCom_scRNA-seq	1
																								PRG4	TICCom_scRNA-seq	1		SEMA3C	TICCom_bulk_RNA-seq,TICCom_scRNA-seq	2
																								PROS1	TICCom_scRNA-seq	1		SERPINE1	TICCom_bulk_RNA-seq,TICCom_scRNA-seq	2
																								PTHLH	TICCom_bulk_RNA-seq,TICCom_scRNA-seq	2		SFRP1	TICCom_scRNA-seq	1
																								PTN	TICCom_scRNA-seq	1		SFRP2	TICCom_scRNA-seq	1
																								RARRES2	TICCom_scRNA-seq	1		SLIT2	TICCom_scRNA-seq	1
																								RSPO3	TICCom_scRNA-seq	1		SLPI	TICCom_bulk_RNA-seq,TICCom_scRNA-seq	2
																								S100A4	TICCom_scRNA-seq	1		SPINK1	TICCom_bulk_RNA-seq,TICCom_scRNA-seq	2
																								S100A8	TICCom_scRNA-seq	1		SPP1	TICCom_bulk_RNA-seq,TICCom_scRNA-seq	2
																								S100A9	TICCom_bulk_RNA-seq,TICCom_scRNA-seq	2		TFF1	TICCom_bulk_RNA-seq,TICCom_scRNA-seq	2
																								S100B	TICCom_scRNA-seq	1		TFPI	TICCom_bulk_RNA-seq,TICCom_scRNA-seq	2
																								SAA1	TICCom_scRNA-seq	1		TGFA	TICCom_bulk_RNA-seq,TICCom_scRNA-seq	2
																								SCGB3A1	TICCom_scRNA-seq	1		TGFB2	TICCom_scRNA-seq	1
																								SEMA3A	TICCom_bulk_RNA-seq,TICCom_scRNA-seq	2		TGFB3	TICCom_bulk_RNA-seq,TICCom_scRNA-seq	2
																								SEMA3B	TICCom_bulk_RNA-seq,TICCom_scRNA-seq	2		TGM2	TICCom_bulk_RNA-seq,TICCom_scRNA-seq	2
																								SEMA3C	TICCom_bulk_RNA-seq,TICCom_scRNA-seq	2		THBS1	TICCom_bulk_RNA-seq,TICCom_scRNA-seq	2
																								SERPINA1	TICCom_scRNA-seq	1		THBS2	TICCom_bulk_RNA-seq,TICCom_scRNA-seq	2
																								SERPINE1	TICCom_bulk_RNA-seq,TICCom_scRNA-seq	2		THBS3	TICCom_bulk_RNA-seq,TICCom_scRNA-seq	2
																								SERPINE2	TICCom_scRNA-seq	1		THBS4	TICCom_bulk_RNA-seq,TICCom_scRNA-seq	2
																								SERPING1	TICCom_bulk_RNA-seq,TICCom_scRNA-seq	2		TIMP1	TICCom_bulk_RNA-seq,TICCom_scRNA-seq	2
																								SFRP2	TICCom_scRNA-seq	1		TIMP2	TICCom_bulk_RNA-seq,TICCom_scRNA-seq	2
																								SLIT2	TICCom_scRNA-seq	1		TIMP3	TICCom_bulk_RNA-seq,TICCom_scRNA-seq	2
																								SLPI	TICCom_scRNA-seq	1		TNF	TICCom_scRNA-seq	1
																								SPINT1	TICCom_bulk_RNA-seq,TICCom_scRNA-seq	2		TNXB	TICCom_scRNA-seq	1
																								SPON2	TICCom_scRNA-seq	1		VCAM1	TICCom_scRNA-seq	1
																								SPP1	CCIDB,TICCom_bulk_RNA-seq,TICCom_scRNA-seq	3		VCAN	TICCom_bulk_RNA-seq,TICCom_scRNA-seq	2
																								TFPI	TICCom_scRNA-seq	1		VEGFA	TICCom_bulk_RNA-seq,TICCom_scRNA-seq	2
																								TGFB3	TICCom_scRNA-seq	1		VTN	TICCom_scRNA-seq	1
																								TGM2	TICCom_bulk_RNA-seq,TICCom_scRNA-seq	2		VWF	TICCom_scRNA-seq	1
																								THBS1	TICCom_bulk_RNA-seq,TICCom_scRNA-seq	2		WNT2B	TICCom_scRNA-seq	1
																								THBS2	TICCom_scRNA-seq	1		ZG16B	TICCom_scRNA-seq	1
																								TIMP2	TICCom_bulk_RNA-seq,TICCom_scRNA-seq	2		ZP3	TICCom_scRNA-seq	1
																								TIMP3	TICCom_bulk_RNA-seq,TICCom_scRNA-seq	2		ADA	TICCom_scRNA-seq	1
																								TNC	TICCom_scRNA-seq	1		AREG	TICCom_bulk_RNA-seq,TICCom_scRNA-seq	2
																								TNF	TICCom_scRNA-seq	1		CADM1	TICCom_bulk_RNA-seq	1
																								TNFSF10	TICCom_scRNA-seq	1		CD1D	TICCom_scRNA-seq	1
																								TNFSF12	TICCom_scRNA-seq	1		CD209	TICCom_scRNA-seq	1
																								TNFSF13B	TICCom_scRNA-seq	1		CD34	TICCom_scRNA-seq	1
																								TNFSF14	TICCom_scRNA-seq	1		CD59	TICCom_scRNA-seq	1
																								VCAM1	TICCom_scRNA-seq	1		CD69	TICCom_scRNA-seq	1
																								VCAN	TICCom_scRNA-seq	1		CD70	TICCom_scRNA-seq	1
																								VEGFA	TICCom_bulk_RNA-seq,TICCom_scRNA-seq	2		CD8A	TICCom_scRNA-seq	1
																								VEGFC	TICCom_scRNA-seq	1		CDH1	TICCom_bulk_RNA-seq,TICCom_scRNA-seq	2
																								VTN	TICCom_scRNA-seq	1		CDH3	TICCom_bulk_RNA-seq,TICCom_scRNA-seq	2
																								VWF	TICCom_scRNA-seq	1		CEACAM1	TICCom_bulk_RNA-seq,TICCom_scRNA-seq	2
																								WNT2B	TICCom_scRNA-seq	1		CEACAM5	TICCom_bulk_RNA-seq,TICCom_scRNA-seq	2
																								WNT4	TICCom_scRNA-seq	1		CEACAM6	TICCom_bulk_RNA-seq,TICCom_scRNA-seq	2
																								WNT5A	TICCom_scRNA-seq	1		CLEC2D	TICCom_scRNA-seq	1
																								WNT5B	TICCom_scRNA-seq	1		DLL4	TICCom_scRNA-seq	1
																								WNT7A	TICCom_scRNA-seq	1		DSC2	TICCom_bulk_RNA-seq,TICCom_scRNA-seq	2
																								WNT7B	TICCom_scRNA-seq	1		EFNA5	TICCom_scRNA-seq	1
																								ADA	TICCom_scRNA-seq	1		EFNB1	TICCom_bulk_RNA-seq,TICCom_scRNA-seq	2
																								ADAM15	TICCom_bulk_RNA-seq,TICCom_scRNA-seq	2		EFNB2	TICCom_bulk_RNA-seq,TICCom_scRNA-seq	2
																								ADAM17	TICCom_bulk_RNA-seq,TICCom_scRNA-seq	2		ENTPD1	TICCom_scRNA-seq	1
																								ALOX5AP	TICCom_scRNA-seq	1		ESAM	TICCom_bulk_RNA-seq,TICCom_scRNA-seq	2
																								CADM1	TICCom_scRNA-seq	1		F11R	TICCom_bulk_RNA-seq,TICCom_scRNA-seq	2
																								CD200	TICCom_scRNA-seq	1		GPC3	TICCom_scRNA-seq	1
																								CD34	TICCom_scRNA-seq	1		HAS2	TICCom_scRNA-seq	1
																								CD46	TICCom_bulk_RNA-seq,TICCom_scRNA-seq	2		HLA-DMA	TICCom_bulk_RNA-seq,TICCom_scRNA-seq	2
																								CD52	TICCom_scRNA-seq	1		HLA-DPA1	TICCom_bulk_RNA-seq,TICCom_scRNA-seq	2
																								CD58	TICCom_scRNA-seq	1		HLA-DPB1	TICCom_bulk_RNA-seq,TICCom_scRNA-seq	2
																								CD59	TICCom_scRNA-seq	1		HLA-DQA1	TICCom_bulk_RNA-seq,TICCom_scRNA-seq	2
																								CD69	TICCom_scRNA-seq	1		HLA-DQB1	TICCom_bulk_RNA-seq,TICCom_scRNA-seq	2
																								CD99	TICCom_bulk_RNA-seq,TICCom_scRNA-seq	2		HLA-DRA	TICCom_bulk_RNA-seq,TICCom_scRNA-seq	2
																								CDH1	TICCom_bulk_RNA-seq,TICCom_scRNA-seq	2		HLA-DRB1	TICCom_bulk_RNA-seq,TICCom_scRNA-seq	2
																								CLEC2D	TICCom_scRNA-seq	1		HLA-DRB5	TICCom_bulk_RNA-seq,TICCom_scRNA-seq	2
																								EFNA5	TICCom_scRNA-seq	1		ICAM1	TICCom_bulk_RNA-seq,TICCom_scRNA-seq	2
																								EFNB2	TICCom_scRNA-seq	1		ITGA4	TICCom_scRNA-seq	1
																								GPC3	TICCom_scRNA-seq	1		ITGA9	TICCom_scRNA-seq	1
																								HLA-A	TICCom_scRNA-seq	1		ITGAL	TICCom_scRNA-seq	1
																								HLA-B	TICCom_scRNA-seq	1		JAG1	TICCom_bulk_RNA-seq,TICCom_scRNA-seq	2
																								HLA-C	TICCom_scRNA-seq	1		JAG2	TICCom_scRNA-seq	1
																								HLA-DMA	TICCom_bulk_RNA-seq,TICCom_scRNA-seq	2		JAM2	TICCom_scRNA-seq	1
																								HLA-DMB	TICCom_scRNA-seq	1		KITLG	TICCom_scRNA-seq	1
																								HLA-DOA	TICCom_scRNA-seq	1		KLRB1	TICCom_scRNA-seq	1
																								HLA-DPA1	TICCom_bulk_RNA-seq,TICCom_scRNA-seq	2		LRIG1	TICCom_bulk_RNA-seq,TICCom_scRNA-seq	2
																								HLA-DPB1	TICCom_bulk_RNA-seq,TICCom_scRNA-seq	2		LYPD3	TICCom_scRNA-seq	1
																								HLA-DQA1	TICCom_scRNA-seq	1		PODXL	TICCom_scRNA-seq	1
																								HLA-DQA2	TICCom_scRNA-seq	1		PODXL2	TICCom_scRNA-seq	1
																								HLA-DQB1	TICCom_scRNA-seq	1		PTDSS1	TICCom_bulk_RNA-seq,TICCom_scRNA-seq	2
																								HLA-DRA	TICCom_bulk_RNA-seq,TICCom_scRNA-seq	2		PTPRM	TICCom_bulk_RNA-seq,TICCom_scRNA-seq	2
																								HLA-DRB1	TICCom_bulk_RNA-seq,TICCom_scRNA-seq	2		SELL	TICCom_scRNA-seq	1
																								HLA-DRB5	TICCom_bulk_RNA-seq,TICCom_scRNA-seq	2		SEMA4A	TICCom_scRNA-seq	1
																								HLA-F	TICCom_scRNA-seq	1		SEMA4B	TICCom_bulk_RNA-seq,TICCom_scRNA-seq	2
																								ICAM1	TICCom_bulk_RNA-seq,TICCom_scRNA-seq	2		THY1	TICCom_scRNA-seq	1
																								ICAM2	TICCom_scRNA-seq	1
																								ICAM3	TICCom_scRNA-seq	1
																								ICOSLG	TICCom_scRNA-seq	1
																								ITGA4	TICCom_scRNA-seq	1
																								ITGAL	TICCom_scRNA-seq	1
																								ITGAM	TICCom_scRNA-seq	1
																								ITGB1	TICCom_scRNA-seq	1
																								ITGB2	TICCom_bulk_RNA-seq,TICCom_scRNA-seq	2
																								JAG1	TICCom_bulk_RNA-seq,TICCom_scRNA-seq	2
																								JAG2	TICCom_scRNA-seq	1
																								JAM2	TICCom_scRNA-seq	1
																								KLRB1	TICCom_scRNA-seq	1
																								LRIG1	TICCom_scRNA-seq	1
																								MPZL1	TICCom_bulk_RNA-seq,TICCom_scRNA-seq	2
																								PECAM1	TICCom_scRNA-seq	1
																								PODXL	TICCom_scRNA-seq	1
																								PODXL2	TICCom_scRNA-seq	1
																								PTPRM	TICCom_scRNA-seq	1
																								SELL	TICCom_scRNA-seq	1
																								SELPLG	TICCom_scRNA-seq	1
																								SEMA4A	TICCom_scRNA-seq	1
																								SEMA4D	TICCom_scRNA-seq	1
																								SEMA5A	TICCom_scRNA-seq	1
																								SIGLEC1	TICCom_scRNA-seq	1
																								THY1	TICCom_bulk_RNA-seq,TICCom_scRNA-seq	2

## Sheet: Table 2
Table 2. Positive receptors
Breast cancer				Colorectal cancer				Glioblastoma				Leukemia				Lung cancer				Melanoma				Ovarian cancer				Pancreatic cancer
Name	Source	Count		Name	Source	Count		Name	Source	Count		Name	Source	Count		Name	Source	Count		Name	Source	Count		Name	Source	Count		Name	Source	Count
ACKR3	TICCom_scRNA-seq	1		ADGRE5	TICCom_bulk_RNA-seq	1		ACVR1	TICCom_bulk_RNA-seq,TICCom_scRNA-seq	2		ACVR1	TICCom_scRNA-seq	1		ADGRE2	TICCom_scRNA-seq	1		ABCA1	TICCom_scRNA-seq	1		ABCA1	TICCom_scRNA-seq	1		ABCA1	TICCom_bulk_RNA-seq,TICCom_scRNA-seq	2
C5AR1	TICCom_scRNA-seq	1		CCR5	CCIDB	1		ACVR1C	TICCom_scRNA-seq	1		ACVR2A	TICCom_scRNA-seq	1		ADGRE5	TICCom_bulk_RNA-seq,TICCom_scRNA-seq	2		ADAM17	TICCom_scRNA-seq	1		ACVR1	TICCom_scRNA-seq	1		ACKR3	TICCom_scRNA-seq	1
CCR1	TICCom_scRNA-seq	1		CD44	TICCom_bulk_RNA-seq	1		ADRB2	TICCom_scRNA-seq	1		ACVR2B	TICCom_scRNA-seq	1		ALCAM	TICCom_bulk_RNA-seq,TICCom_scRNA-seq	2		ADORA2A	TICCom_scRNA-seq	1		ACVRL1	TICCom_scRNA-seq	1		ACVR2B	TICCom_scRNA-seq	1
CCR2	CCIDB,TICCom_scRNA-seq	2		CD55	TICCom_bulk_RNA-seq	1		AGER	TICCom_scRNA-seq	1		ADGRE2	TICCom_bulk_RNA-seq,TICCom_scRNA-seq	2		APLP2	TICCom_bulk_RNA-seq,TICCom_scRNA-seq	2		ADRB2	TICCom_scRNA-seq	1		ADAM17	TICCom_bulk_RNA-seq,TICCom_scRNA-seq	2		ADRA2A	TICCom_bulk_RNA-seq,TICCom_scRNA-seq	2
CCR7	TICCom_scRNA-seq	1		CXCR5	CCIDB	1		AQP1	TICCom_scRNA-seq	1		ADGRE5	TICCom_bulk_RNA-seq,TICCom_scRNA-seq	2		CAP1	TICCom_scRNA-seq	1		ALCAM	TICCom_scRNA-seq	1		ADCYAP1R1	TICCom_scRNA-seq	1		ADRB2	TICCom_scRNA-seq	1
CCRL2	TICCom_scRNA-seq	1		ENG	TICCom_bulk_RNA-seq	1		AXL	TICCom_bulk_RNA-seq,TICCom_scRNA-seq	2		ADORA2A	TICCom_scRNA-seq	1		CD151	TICCom_bulk_RNA-seq,TICCom_scRNA-seq	2		AXL	TICCom_scRNA-seq	1		ADGRE5	TICCom_bulk_RNA-seq	1		AQP1	TICCom_bulk_RNA-seq,TICCom_scRNA-seq	2
CD180	TICCom_scRNA-seq	1		HLA-F	TICCom_bulk_RNA-seq	1		BMPR1B	TICCom_scRNA-seq	1		AGER	TICCom_scRNA-seq	1		CD163	TICCom_bulk_RNA-seq,TICCom_scRNA-seq	2		BMPR2	TICCom_scRNA-seq	1		ADGRG1	TICCom_bulk_RNA-seq	1		AXL	CCIDB,TICCom_bulk_RNA-seq,TICCom_scRNA-seq	3
CD33	TICCom_scRNA-seq	1		IL10RA	CCIDB	1		C3AR1	TICCom_scRNA-seq	1		CCR5	TICCom_scRNA-seq	1		CD36	TICCom_scRNA-seq	1		C5AR1	TICCom_scRNA-seq	1		ADRA2A	TICCom_scRNA-seq	1		BAMBI	TICCom_scRNA-seq	1
CD36	TICCom_scRNA-seq	1		IL17RA	CCIDB	1		C5AR1	TICCom_scRNA-seq	1		CD247	TICCom_scRNA-seq	1		CD44	TICCom_bulk_RNA-seq,TICCom_scRNA-seq	2		CCR1	TICCom_scRNA-seq	1		ADRB2	TICCom_bulk_RNA-seq,TICCom_scRNA-seq	2		BCAM	TICCom_bulk_RNA-seq,TICCom_scRNA-seq	2
CD4	TICCom_scRNA-seq	1		IL6R	CCIDB	1		CALCRL	TICCom_scRNA-seq	1		CD36	TICCom_scRNA-seq	1		CD47	TICCom_bulk_RNA-seq,TICCom_scRNA-seq	2		CCR2	TICCom_scRNA-seq	1		ALCAM	TICCom_bulk_RNA-seq,TICCom_scRNA-seq	2		BDKRB2	TICCom_scRNA-seq	1
CD40	TICCom_scRNA-seq	1		IL6ST	CCIDB	1		CAV1	TICCom_scRNA-seq	1		CD3D	TICCom_scRNA-seq	1		CD55	TICCom_bulk_RNA-seq,TICCom_scRNA-seq	2		CCR5	TICCom_scRNA-seq	1		ANTXR1	TICCom_scRNA-seq	1		BMPR2	TICCom_scRNA-seq	1
CD48	TICCom_scRNA-seq	1		PLAUR	TICCom_bulk_RNA-seq	1		CCR1	TICCom_scRNA-seq	1		CD3G	TICCom_scRNA-seq	1		CD63	TICCom_bulk_RNA-seq,TICCom_scRNA-seq	2		CCRL2	TICCom_scRNA-seq	1		AQP1	TICCom_scRNA-seq	1		C3AR1	TICCom_scRNA-seq	1
CD68	TICCom_scRNA-seq	1		RGCC	CCIDB	1		CD33	TICCom_scRNA-seq	1		CD4	TICCom_scRNA-seq	1		CD68	TICCom_scRNA-seq	1		CD180	TICCom_scRNA-seq	1		AXL	TICCom_scRNA-seq	1		C5AR1	TICCom_scRNA-seq	1
CD69	TICCom_scRNA-seq	1		SDC4	TICCom_bulk_RNA-seq	1		CD36	TICCom_scRNA-seq	1		CD44	TICCom_scRNA-seq	1		CD69	TICCom_scRNA-seq	1		CD22	TICCom_scRNA-seq	1		BMPR2	TICCom_scRNA-seq	1		CALCRL	TICCom_scRNA-seq	1
CD93	TICCom_bulk_RNA-seq,TICCom_scRNA-seq	2		TFRC	TICCom_bulk_RNA-seq	1		CD4	TICCom_scRNA-seq	1		CD48	TICCom_scRNA-seq	1		CD74	TICCom_bulk_RNA-seq,TICCom_scRNA-seq	2		CD247	TICCom_scRNA-seq	1		C3AR1	TICCom_scRNA-seq	1		CAV1	TICCom_bulk_RNA-seq,TICCom_scRNA-seq	2
CXCR4	TICCom_bulk_RNA-seq,TICCom_scRNA-seq	2		TGFBR2	TICCom_bulk_RNA-seq	1		CD44	TICCom_bulk_RNA-seq,TICCom_scRNA-seq	2		CD55	TICCom_bulk_RNA-seq,TICCom_scRNA-seq	2		CD82	TICCom_scRNA-seq	1		CD36	TICCom_scRNA-seq	1		C5AR1	TICCom_scRNA-seq	1		CCR1	TICCom_scRNA-seq	1
DPP4	TICCom_scRNA-seq	1		TNFRSF10B	TICCom_bulk_RNA-seq	1		CD82	TICCom_scRNA-seq	1		CD63	TICCom_bulk_RNA-seq,TICCom_scRNA-seq	2		CD9	TICCom_bulk_RNA-seq,TICCom_scRNA-seq	2		CD3D	TICCom_scRNA-seq	1		CALCRL	TICCom_scRNA-seq	1		CCR10	TICCom_scRNA-seq	1
EDNRB	TICCom_scRNA-seq	1		TSPAN1	TICCom_bulk_RNA-seq	1		CDH2	TICCom_bulk_RNA-seq,TICCom_scRNA-seq	2		CD68	TICCom_scRNA-seq	1		CD93	TICCom_bulk_RNA-seq,TICCom_scRNA-seq	2		CD3G	TICCom_scRNA-seq	1		CATSPER1	TICCom_scRNA-seq	1		CCR2	TICCom_scRNA-seq	1
FCGR2B	TICCom_scRNA-seq	1		CD81	TICCom_bulk_RNA-seq	1		CDH5	TICCom_scRNA-seq	1		CD69	TICCom_bulk_RNA-seq,TICCom_scRNA-seq	2		CXCR4	TICCom_bulk_RNA-seq,TICCom_scRNA-seq	2		CD4	TICCom_scRNA-seq	1		CAV1	TICCom_bulk_RNA-seq,TICCom_scRNA-seq	2		CCR6	CCIDB,TICCom_scRNA-seq	2
FGFR1	TICCom_scRNA-seq	1		CD99	TICCom_bulk_RNA-seq	1		CMKLR1	TICCom_scRNA-seq	1		CD8A	TICCom_scRNA-seq	1		ENG	TICCom_bulk_RNA-seq,TICCom_scRNA-seq	2		CD40	TICCom_scRNA-seq	1		CCR1	TICCom_scRNA-seq	1		CCR7	TICCom_scRNA-seq	1
FLT1	TICCom_scRNA-seq	1		CEACAM1	TICCom_bulk_RNA-seq	1		CNTN1	TICCom_bulk_RNA-seq,TICCom_scRNA-seq	2		CD8B	TICCom_scRNA-seq	1		FLT1	TICCom_bulk_RNA-seq,TICCom_scRNA-seq	2		CD48	TICCom_scRNA-seq	1		CCR2	TICCom_scRNA-seq	1		CCRL2	TICCom_scRNA-seq	1
FPR3	TICCom_scRNA-seq	1		CEACAM5	TICCom_bulk_RNA-seq	1		CNTN2	TICCom_scRNA-seq	1		CXCR4	TICCom_bulk_RNA-seq,TICCom_scRNA-seq	2		FPR1	TICCom_scRNA-seq	1		CD6	TICCom_scRNA-seq	1		CCR5	TICCom_scRNA-seq	1		CD163	TICCom_scRNA-seq	1
GPR84	TICCom_scRNA-seq	1		PECAM1	TICCom_bulk_RNA-seq	1		CNTNAP2	TICCom_scRNA-seq	1		EPHA4	TICCom_scRNA-seq	1		HAVCR2	TICCom_scRNA-seq	1		CD63	TICCom_bulk_RNA-seq,TICCom_scRNA-seq	2		CCR6	TICCom_scRNA-seq	1		CD19	TICCom_scRNA-seq	1
IFITM1	TICCom_bulk_RNA-seq,TICCom_scRNA-seq	2		TLR4	CCIDB	1		CSF1R	TICCom_bulk_RNA-seq,TICCom_scRNA-seq	2		F2R	TICCom_scRNA-seq	1		HLA-F	TICCom_bulk_RNA-seq,TICCom_scRNA-seq	2		CD69	TICCom_scRNA-seq	1		CCRL2	TICCom_scRNA-seq	1		CD36	TICCom_scRNA-seq	1
IL1R1	CCIDB	1						CXCR4	TICCom_bulk_RNA-seq,TICCom_scRNA-seq	2		FLT3	TICCom_scRNA-seq	1		IL1RAP	TICCom_scRNA-seq	1		CD79A	TICCom_scRNA-seq	1		CD247	TICCom_scRNA-seq	1		CD4	TICCom_bulk_RNA-seq,TICCom_scRNA-seq	2
ITGA5	TICCom_bulk_RNA-seq,TICCom_scRNA-seq	2						DAG1	TICCom_bulk_RNA-seq,TICCom_scRNA-seq	2		IGF2R	TICCom_scRNA-seq	1		ITGA5	TICCom_bulk_RNA-seq,TICCom_scRNA-seq	2		CD8A	TICCom_scRNA-seq	1		CD33	TICCom_scRNA-seq	1		CD63	TICCom_bulk_RNA-seq,TICCom_scRNA-seq	2
ITGB2	TICCom_bulk_RNA-seq,TICCom_scRNA-seq	2						DCC	TICCom_scRNA-seq	1		IL18BP	TICCom_scRNA-seq	1		ITGAM	TICCom_scRNA-seq	1		CD93	TICCom_scRNA-seq	1		CD36	TICCom_scRNA-seq	1		CD68	TICCom_bulk_RNA-seq,TICCom_scRNA-seq	2
PDGFRB	TICCom_bulk_RNA-seq	1						DYSF	TICCom_scRNA-seq	1		IL18R1	TICCom_scRNA-seq	1		ITGAV	TICCom_bulk_RNA-seq,TICCom_scRNA-seq	2		CD96	TICCom_scRNA-seq	1		CD3D	TICCom_scRNA-seq	1		CD69	TICCom_scRNA-seq	1
PLAUR	TICCom_scRNA-seq	1						EDA2R	TICCom_scRNA-seq	1		IL18RAP	TICCom_scRNA-seq	1		ITGB1	TICCom_bulk_RNA-seq,TICCom_scRNA-seq	2		CR1	TICCom_scRNA-seq	1		CD3G	TICCom_scRNA-seq	1		CD74	TICCom_bulk_RNA-seq,TICCom_scRNA-seq	2
RECK	TICCom_scRNA-seq	1						EGFR	TICCom_bulk_RNA-seq,TICCom_scRNA-seq	2		IL1RAP	TICCom_scRNA-seq	1		ITGB2	TICCom_bulk_RNA-seq,TICCom_scRNA-seq	2		CXCR1	TICCom_scRNA-seq	1		CD4	TICCom_scRNA-seq	1		CD79A	TICCom_scRNA-seq	1
SDC2	TICCom_bulk_RNA-seq,TICCom_scRNA-seq	2						ENG	TICCom_bulk_RNA-seq,TICCom_scRNA-seq	2		INSR	TICCom_scRNA-seq	1		LAMP1	TICCom_bulk_RNA-seq,TICCom_scRNA-seq	2		DPP4	TICCom_scRNA-seq	1		CD40	TICCom_scRNA-seq	1		CD9	TICCom_scRNA-seq	1
TLR1	TICCom_scRNA-seq	1						EPHA3	TICCom_scRNA-seq	1		ITGAL	TICCom_bulk_RNA-seq,TICCom_scRNA-seq	2		LILRB2	TICCom_scRNA-seq	1		ERBB3	TICCom_scRNA-seq	1		CD44	CCIDB,TICCom_bulk_RNA-seq,TICCom_scRNA-seq	3		CD93	TICCom_bulk_RNA-seq,TICCom_scRNA-seq	2
TLR4	TICCom_scRNA-seq	1						EPHA4	TICCom_scRNA-seq	1		ITGAM	TICCom_scRNA-seq	1		LRP10	TICCom_bulk_RNA-seq,TICCom_scRNA-seq	2		EZR	TICCom_scRNA-seq	1		CD46	TICCom_bulk_RNA-seq,TICCom_scRNA-seq	2		CDH11	TICCom_scRNA-seq	1
TNFRSF10C	TICCom_scRNA-seq	1						EPHA7	TICCom_scRNA-seq	1		ITGAV	TICCom_scRNA-seq	1		NOTCH2	TICCom_scRNA-seq	1		FGFR1	TICCom_scRNA-seq	1		CD47	TICCom_bulk_RNA-seq,TICCom_scRNA-seq	2		CELSR2	TICCom_scRNA-seq	1
TNFRSF10D	TICCom_scRNA-seq	1						EPHB1	TICCom_scRNA-seq	1		ITGB1	TICCom_bulk_RNA-seq,TICCom_scRNA-seq	2		NRP1	TICCom_bulk_RNA-seq,TICCom_scRNA-seq	2		FLT1	TICCom_scRNA-seq	1		CD48	TICCom_scRNA-seq	1		CHRM3	TICCom_scRNA-seq	1
TNFRSF13C	TICCom_scRNA-seq	1						ERBB2	TICCom_scRNA-seq	1		ITGB2	TICCom_bulk_RNA-seq,TICCom_scRNA-seq	2		PLAUR	TICCom_bulk_RNA-seq,TICCom_scRNA-seq	2		FPR1	TICCom_scRNA-seq	1		CD55	TICCom_bulk_RNA-seq	1		COL13A1	TICCom_scRNA-seq	1
TNFRSF14	TICCom_bulk_RNA-seq,TICCom_scRNA-seq	2						EZR	TICCom_scRNA-seq	1		KCNA3	TICCom_scRNA-seq	1		PTPRC	TICCom_bulk_RNA-seq,TICCom_scRNA-seq	2		FPR3	TICCom_scRNA-seq	1		CD6	TICCom_scRNA-seq	1		COL17A1	TICCom_bulk_RNA-seq,TICCom_scRNA-seq	2
CAV1	TICCom_scRNA-seq	1						FGFR3	TICCom_scRNA-seq	1		KLRC1	TICCom_scRNA-seq	1		RPSA	TICCom_bulk_RNA-seq,TICCom_scRNA-seq	2		FZD3	TICCom_scRNA-seq	1		CD68	TICCom_bulk_RNA-seq,TICCom_scRNA-seq	2		CR1	TICCom_scRNA-seq	1
CD2	TICCom_scRNA-seq	1						FZD3	TICCom_scRNA-seq	1		KLRD1	TICCom_scRNA-seq	1		SDC4	TICCom_bulk_RNA-seq,TICCom_scRNA-seq	2		HAVCR2	TICCom_scRNA-seq	1		CD69	TICCom_scRNA-seq	1		CSF1R	TICCom_bulk_RNA-seq,TICCom_scRNA-seq	2
CD200R1	TICCom_scRNA-seq	1						FZD6	TICCom_scRNA-seq	1		KLRK1	TICCom_scRNA-seq	1		SIGIRR	TICCom_scRNA-seq	1		HFE	TICCom_scRNA-seq	1		CD74	TICCom_bulk_RNA-seq,TICCom_scRNA-seq	2		CXCR2	TICCom_scRNA-seq	1
CD8A	TICCom_scRNA-seq	1						FZD7	TICCom_scRNA-seq	1		LAMP1	TICCom_bulk_RNA-seq,TICCom_scRNA-seq	2		SLC1A5	TICCom_bulk_RNA-seq,TICCom_scRNA-seq	2		HLA-F	TICCom_bulk_RNA-seq,TICCom_scRNA-seq	2		CD81	TICCom_bulk_RNA-seq,TICCom_scRNA-seq	2		CXCR3	TICCom_scRNA-seq	1
CD8B	TICCom_scRNA-seq	1						GRIN2B	TICCom_scRNA-seq	1		LDLR	TICCom_scRNA-seq	1		ST14	TICCom_bulk_RNA-seq,TICCom_scRNA-seq	2		IFNAR1	TICCom_scRNA-seq	1		CD8A	TICCom_scRNA-seq	1		CXCR4	CCIDB,TICCom_bulk_RNA-seq,TICCom_scRNA-seq	3
HMMR	TICCom_scRNA-seq	1						GRIN2D	TICCom_scRNA-seq	1		LILRB2	TICCom_scRNA-seq	1		TFRC	TICCom_bulk_RNA-seq,TICCom_scRNA-seq	2		IGF2R	TICCom_scRNA-seq	1		CD8B	TICCom_scRNA-seq	1		DDR1	TICCom_bulk_RNA-seq,TICCom_scRNA-seq	2
THY1	TICCom_scRNA-seq	1						IL18BP	TICCom_scRNA-seq	1		NCAM1	TICCom_scRNA-seq	1		TGFBR2	TICCom_bulk_RNA-seq,TICCom_scRNA-seq	2		IL10RA	TICCom_scRNA-seq	1		CD9	TICCom_bulk_RNA-seq,TICCom_scRNA-seq	2		DDR2	TICCom_scRNA-seq	1
								IL1RAPL1	TICCom_scRNA-seq	1		PTPRC	TICCom_bulk_RNA-seq,TICCom_scRNA-seq	2		THBD	TICCom_bulk_RNA-seq,TICCom_scRNA-seq	2		IL18BP	TICCom_scRNA-seq	1		CD93	TICCom_scRNA-seq	1		DPP4	TICCom_scRNA-seq	1
								ITGA3	TICCom_scRNA-seq	1		RIPK1	TICCom_scRNA-seq	1		TLR2	TICCom_bulk_RNA-seq,TICCom_scRNA-seq	2		IL18R1	TICCom_scRNA-seq	1		CDH11	TICCom_scRNA-seq	1		EDNRA	TICCom_scRNA-seq	1
								ITGA4	TICCom_scRNA-seq	1		ROBO3	TICCom_scRNA-seq	1		TNFRSF1A	TICCom_bulk_RNA-seq,TICCom_scRNA-seq	2		IL1R1	TICCom_scRNA-seq	1		CELSR2	TICCom_scRNA-seq	1		EDNRB	TICCom_scRNA-seq	1
								ITGA6	TICCom_bulk_RNA-seq,TICCom_scRNA-seq	2		SDC1	TICCom_scRNA-seq	1		TNFRSF1B	TICCom_bulk_RNA-seq,TICCom_scRNA-seq	2		IL1R2	TICCom_scRNA-seq	1		CMKLR1	TICCom_scRNA-seq	1		EGFR	TICCom_bulk_RNA-seq,TICCom_scRNA-seq	2
								ITGA7	TICCom_bulk_RNA-seq,TICCom_scRNA-seq	2		SELL	TICCom_scRNA-seq	1		ALOX5	TICCom_bulk_RNA-seq,TICCom_scRNA-seq	2		ITGA3	TICCom_bulk_RNA-seq,TICCom_scRNA-seq	2		CNTN1	TICCom_scRNA-seq	1		ENG	TICCom_bulk_RNA-seq,TICCom_scRNA-seq	2
								ITGA9	TICCom_scRNA-seq	1		SIGIRR	TICCom_scRNA-seq	1		CANX	TICCom_bulk_RNA-seq,TICCom_scRNA-seq	2		ITGA4	TICCom_scRNA-seq	1		CR1	TICCom_scRNA-seq	1		ENPEP	TICCom_scRNA-seq	1
								ITGAM	TICCom_scRNA-seq	1		SMAD3	TICCom_scRNA-seq	1		CD81	TICCom_bulk_RNA-seq,TICCom_scRNA-seq	2		ITGA5	TICCom_scRNA-seq	1		CXCR3	TICCom_scRNA-seq	1		EPHA1	TICCom_scRNA-seq	1
								ITGAX	TICCom_scRNA-seq	1		TFRC	TICCom_bulk_RNA-seq,TICCom_scRNA-seq	2		CD99	TICCom_bulk_RNA-seq,TICCom_scRNA-seq	2		ITGA9	TICCom_scRNA-seq	1		CXCR4	TICCom_scRNA-seq	1		EPHA2	TICCom_bulk_RNA-seq,TICCom_scRNA-seq	2
								ITGB2	TICCom_bulk_RNA-seq,TICCom_scRNA-seq	2		TGFBR3	TICCom_scRNA-seq	1		F11R	TICCom_bulk_RNA-seq,TICCom_scRNA-seq	2		ITGAL	TICCom_scRNA-seq	1		CXCR6	TICCom_scRNA-seq	1		EPHA4	TICCom_scRNA-seq	1
								ITGB5	TICCom_bulk_RNA-seq,TICCom_scRNA-seq	2		TNFRSF10A	TICCom_scRNA-seq	1		HLA-B	CCIDB	1		ITGAM	TICCom_scRNA-seq	1		DAG1	TICCom_bulk_RNA-seq,TICCom_scRNA-seq	2		ERBB2	TICCom_bulk_RNA-seq,TICCom_scRNA-seq	2
								KCND2	TICCom_scRNA-seq	1		TNFRSF10B	TICCom_scRNA-seq	1		ICAM1	TICCom_bulk_RNA-seq,TICCom_scRNA-seq	2		ITGB2	TICCom_bulk_RNA-seq,TICCom_scRNA-seq	2		DDR1	TICCom_bulk_RNA-seq,TICCom_scRNA-seq	2		ERBB3	TICCom_bulk_RNA-seq,TICCom_scRNA-seq	2
								KCNJ10	TICCom_scRNA-seq	1		TNFRSF14	TICCom_bulk_RNA-seq,TICCom_scRNA-seq	2		IL2RG	TICCom_bulk_RNA-seq,TICCom_scRNA-seq	2		ITGB3	TICCom_scRNA-seq	1		DDR2	TICCom_scRNA-seq	1		EZR	TICCom_scRNA-seq	1
								LDLR	TICCom_scRNA-seq	1		TNFRSF17	TICCom_scRNA-seq	1		IL6R	TICCom_scRNA-seq	1		ITGB7	TICCom_scRNA-seq	1		DPP4	TICCom_scRNA-seq	1		F2R	TICCom_bulk_RNA-seq,TICCom_scRNA-seq	2
								LTBR	TICCom_scRNA-seq	1		TRAF3	TICCom_scRNA-seq	1		ITGAX	TICCom_scRNA-seq	1		KLRD1	TICCom_scRNA-seq	1		EDNRA	TICCom_scRNA-seq	1		F2RL1	TICCom_bulk_RNA-seq,TICCom_scRNA-seq	2
								MERTK	TICCom_scRNA-seq	1		BMPR2	TICCom_scRNA-seq	1		JMJD6	TICCom_scRNA-seq	1		KLRK1	TICCom_scRNA-seq	1		EDNRB	TICCom_scRNA-seq	1		F3	TICCom_bulk_RNA-seq,TICCom_scRNA-seq	2
								MET	TICCom_scRNA-seq	1		CADM1	TICCom_scRNA-seq	1		LAIR1	TICCom_scRNA-seq	1		LILRB1	TICCom_scRNA-seq	1		ENG	TICCom_scRNA-seq	1		FAS	TICCom_scRNA-seq	1
								MRC2	TICCom_scRNA-seq	1		CD2	TICCom_scRNA-seq	1		MCFD2	TICCom_bulk_RNA-seq,TICCom_scRNA-seq	2		LILRB2	TICCom_scRNA-seq	1		EPHA3	TICCom_scRNA-seq	1		FGFR1	TICCom_bulk_RNA-seq,TICCom_scRNA-seq	2
								NRP1	TICCom_scRNA-seq	1		CD200R1	TICCom_scRNA-seq	1		MPZL1	TICCom_bulk_RNA-seq,TICCom_scRNA-seq	2		LRP1	TICCom_bulk_RNA-seq,TICCom_scRNA-seq	2		ERAP1	TICCom_scRNA-seq	1		FGFR2	TICCom_scRNA-seq	1
								NRP2	TICCom_scRNA-seq	1		CD34	TICCom_scRNA-seq	1		MRC1	TICCom_scRNA-seq	1		LRP6	TICCom_scRNA-seq	1		EZR	TICCom_scRNA-seq	1		FGFR3	TICCom_scRNA-seq	1
								NRXN1	TICCom_scRNA-seq	1		CDH1	TICCom_scRNA-seq	1		MUC1	TICCom_bulk_RNA-seq,TICCom_scRNA-seq	2		MERTK	TICCom_scRNA-seq	1		F2R	TICCom_scRNA-seq	1		FGFR4	TICCom_scRNA-seq	1
								NRXN2	TICCom_scRNA-seq	1		CDH4	TICCom_scRNA-seq	1		PILRA	TICCom_scRNA-seq	1		MSN	TICCom_scRNA-seq	1		F3	TICCom_scRNA-seq	1		FLT1	TICCom_bulk_RNA-seq,TICCom_scRNA-seq	2
								NRXN3	TICCom_scRNA-seq	1		IGF1R	TICCom_scRNA-seq	1		TREM1	TICCom_scRNA-seq	1		NRCAM	TICCom_scRNA-seq	1		FGFR1	TICCom_scRNA-seq	1		FPR1	TICCom_scRNA-seq	1
								PLSCR4	TICCom_scRNA-seq	1		IL6R	TICCom_bulk_RNA-seq,TICCom_scRNA-seq	2		TSPAN14	TICCom_scRNA-seq	1		NRP1	TICCom_scRNA-seq	1		FPR1	TICCom_scRNA-seq	1		FPR2	TICCom_scRNA-seq	1
								PTPRC	TICCom_scRNA-seq	1		ITGAE	TICCom_scRNA-seq	1						PARD3	TICCom_scRNA-seq	1		FPR3	TICCom_scRNA-seq	1		FZD3	TICCom_scRNA-seq	1
								RAMP1	TICCom_scRNA-seq	1		ITGB7	TICCom_scRNA-seq	1						PLAUR	TICCom_scRNA-seq	1		FZD1	TICCom_scRNA-seq	1		FZD5	TICCom_scRNA-seq	1
								RIPK1	TICCom_scRNA-seq	1		KLRB1	TICCom_scRNA-seq	1						PRLR	TICCom_scRNA-seq	1		FZD2	TICCom_scRNA-seq	1		FZD6	TICCom_bulk_RNA-seq,TICCom_scRNA-seq	2
								ROBO2	TICCom_scRNA-seq	1		KLRG1	TICCom_scRNA-seq	1						PTGER4	TICCom_scRNA-seq	1		FZD3	TICCom_scRNA-seq	1		FZD8	TICCom_scRNA-seq	1
								SDC3	TICCom_bulk_RNA-seq,TICCom_scRNA-seq	2		MCFD2	TICCom_bulk_RNA-seq,TICCom_scRNA-seq	2						PTPRC	TICCom_scRNA-seq	1		FZD4	TICCom_scRNA-seq	1		GPR171	TICCom_scRNA-seq	1
								SDC4	TICCom_bulk_RNA-seq,TICCom_scRNA-seq	2		NOTCH1	TICCom_bulk_RNA-seq,TICCom_scRNA-seq	2						PTPRS	TICCom_scRNA-seq	1		FZD5	TICCom_scRNA-seq	1		GPR35	TICCom_scRNA-seq	1
								SIRPA	TICCom_bulk_RNA-seq,TICCom_scRNA-seq	2		PECAM1	TICCom_bulk_RNA-seq,TICCom_scRNA-seq	2						PTPRZ1	TICCom_scRNA-seq	1		GPC1	TICCom_bulk_RNA-seq,TICCom_scRNA-seq	2		GPR84	TICCom_scRNA-seq	1
								SMAD3	TICCom_scRNA-seq	1		PLXNB2	TICCom_bulk_RNA-seq,TICCom_scRNA-seq	2						RECK	TICCom_scRNA-seq	1		GPR84	TICCom_scRNA-seq	1		IFITM1	TICCom_bulk_RNA-seq,TICCom_scRNA-seq	2
								SORL1	TICCom_bulk_RNA-seq,TICCom_scRNA-seq	2		SIGLEC10	TICCom_bulk_RNA-seq,TICCom_scRNA-seq	2						S1PR1	TICCom_scRNA-seq	1		HAVCR2	TICCom_scRNA-seq	1		IGF1R	TICCom_scRNA-seq	1
								SV2A	TICCom_scRNA-seq	1		TSPAN14	TICCom_bulk_RNA-seq,TICCom_scRNA-seq	2						SDC2	TICCom_scRNA-seq	1		HLA-F	TICCom_bulk_RNA-seq,TICCom_scRNA-seq	2		IL12RB1	TICCom_scRNA-seq	1
								TGFBR2	TICCom_bulk_RNA-seq,TICCom_scRNA-seq	2		TSPAN5	TICCom_scRNA-seq	1						SELL	TICCom_scRNA-seq	1		HRH1	TICCom_scRNA-seq	1		IL1R1	CCIDB,TICCom_scRNA-seq	2
								TIE1	TICCom_scRNA-seq	1										SMAD3	TICCom_scRNA-seq	1		IFITM1	TICCom_bulk_RNA-seq,TICCom_scRNA-seq	2		IL1R2	TICCom_scRNA-seq	1
								TLR1	TICCom_scRNA-seq	1										SORL1	TICCom_scRNA-seq	1		IFNAR1	TICCom_scRNA-seq	1		INSR	TICCom_bulk_RNA-seq,TICCom_scRNA-seq	2
								TNFRSF10B	TICCom_scRNA-seq	1										SORT1	TICCom_bulk_RNA-seq,TICCom_scRNA-seq	2		IGF2R	TICCom_bulk_RNA-seq,TICCom_scRNA-seq	2		ITGA1	TICCom_bulk_RNA-seq,TICCom_scRNA-seq	2
								TNFRSF10D	TICCom_scRNA-seq	1										ST14	TICCom_scRNA-seq	1		IGFLR1	TICCom_scRNA-seq	1		ITGA10	TICCom_scRNA-seq	1
								TNFRSF1B	TICCom_scRNA-seq	1										TFR2	TICCom_scRNA-seq	1		IL10RB	TICCom_scRNA-seq	1		ITGA2	TICCom_bulk_RNA-seq,TICCom_scRNA-seq	2
								TREM2	TICCom_bulk_RNA-seq,TICCom_scRNA-seq	2										TGFBR2	TICCom_bulk_RNA-seq,TICCom_scRNA-seq	2		IL18BP	TICCom_scRNA-seq	1		ITGA3	TICCom_bulk_RNA-seq,TICCom_scRNA-seq	2
								TRPV2	TICCom_scRNA-seq	1										TIGIT	TICCom_scRNA-seq	1		IL1R1	TICCom_scRNA-seq	1		ITGA4	TICCom_scRNA-seq	1
								CD226	TICCom_scRNA-seq	1										TLR1	TICCom_scRNA-seq	1		IL1R2	TICCom_scRNA-seq	1		ITGA6	TICCom_bulk_RNA-seq,TICCom_scRNA-seq	2
								CDH4	TICCom_scRNA-seq	1										TLR2	TICCom_scRNA-seq	1		IL2RG	TICCom_scRNA-seq	1		ITGA7	TICCom_scRNA-seq	1
								ICAM1	TICCom_scRNA-seq	1										TLR4	TICCom_scRNA-seq	1		IL6R	CCIDB,TICCom_scRNA-seq	2		ITGA9	TICCom_scRNA-seq	1
								ITGAL	TICCom_scRNA-seq	1										TLR6	TICCom_scRNA-seq	1		IL6ST	TICCom_scRNA-seq	1		ITGAL	TICCom_scRNA-seq	1
								JAM2	TICCom_bulk_RNA-seq,TICCom_scRNA-seq	2										TNFRSF10A	TICCom_scRNA-seq	1		IL7R	TICCom_scRNA-seq	1		ITGAX	TICCom_scRNA-seq	1
								LAIR1	TICCom_scRNA-seq	1										TNFRSF10B	TICCom_scRNA-seq	1		INSR	TICCom_scRNA-seq	1		ITGB4	TICCom_bulk_RNA-seq,TICCom_scRNA-seq	2
								LILRB1	TICCom_scRNA-seq	1										TNFRSF14	TICCom_scRNA-seq	1		ITGA1	TICCom_scRNA-seq	1		ITGB5	TICCom_bulk_RNA-seq,TICCom_scRNA-seq	2
								MCFD2	TICCom_bulk_RNA-seq,TICCom_scRNA-seq	2										TNFRSF1A	TICCom_bulk_RNA-seq,TICCom_scRNA-seq	2		ITGA10	TICCom_scRNA-seq	1		ITGB6	TICCom_bulk_RNA-seq,TICCom_scRNA-seq	2
								MPZ	TICCom_scRNA-seq	1										TNFRSF1B	TICCom_scRNA-seq	1		ITGA11	TICCom_scRNA-seq	1		ITGB8	TICCom_scRNA-seq	1
								MPZL1	TICCom_bulk_RNA-seq,TICCom_scRNA-seq	2										TREM2	TICCom_scRNA-seq	1		ITGA2	TICCom_bulk_RNA-seq,TICCom_scRNA-seq	2		KDR	TICCom_bulk_RNA-seq,TICCom_scRNA-seq	2
								MRC1	TICCom_scRNA-seq	1										ALOX5	TICCom_scRNA-seq	1		ITGA3	TICCom_bulk_RNA-seq,TICCom_scRNA-seq	2		KIT	TICCom_scRNA-seq	1
								NEGR1	TICCom_scRNA-seq	1										CADM1	TICCom_scRNA-seq	1		ITGA4	TICCom_scRNA-seq	1		KREMEN2	TICCom_scRNA-seq	1
								NLGN1	TICCom_scRNA-seq	1										CD2	TICCom_scRNA-seq	1		ITGA5	TICCom_scRNA-seq	1		LDLR	TICCom_bulk_RNA-seq,TICCom_scRNA-seq	2
								NOTCH1	TICCom_bulk_RNA-seq,TICCom_scRNA-seq	2										CD72	TICCom_scRNA-seq	1		ITGA6	TICCom_bulk_RNA-seq,TICCom_scRNA-seq	2		LEPR	TICCom_scRNA-seq	1
								NOTCH2	TICCom_bulk_RNA-seq,TICCom_scRNA-seq	2										CLDN11	TICCom_scRNA-seq	1		ITGA7	TICCom_scRNA-seq	1		LGR4	TICCom_scRNA-seq	1
								NTNG1	TICCom_scRNA-seq	1										EPHB4	TICCom_scRNA-seq	1		ITGA9	TICCom_scRNA-seq	1		LIFR	CCIDB,TICCom_scRNA-seq	2
								PECAM1	TICCom_scRNA-seq	1										F11R	TICCom_scRNA-seq	1		ITGAL	TICCom_scRNA-seq	1		LPAR2	TICCom_scRNA-seq	1
								PLD2	TICCom_scRNA-seq	1										ICAM2	TICCom_scRNA-seq	1		ITGAM	TICCom_scRNA-seq	1		LRP5	TICCom_bulk_RNA-seq,TICCom_scRNA-seq	2
								PLXNA3	TICCom_scRNA-seq	1										IL6R	TICCom_scRNA-seq	1		ITGAV	TICCom_bulk_RNA-seq,TICCom_scRNA-seq	2		LSR	TICCom_bulk_RNA-seq,TICCom_scRNA-seq	2
								RHBDL2	TICCom_scRNA-seq	1										KLRB1	TICCom_scRNA-seq	1		ITGAX	TICCom_scRNA-seq	1		MET	TICCom_bulk_RNA-seq,TICCom_scRNA-seq	2
								VCAM1	TICCom_scRNA-seq	1										MPZL1	TICCom_bulk_RNA-seq,TICCom_scRNA-seq	2		ITGB1	TICCom_bulk_RNA-seq,TICCom_scRNA-seq	2		MRC2	TICCom_bulk_RNA-seq,TICCom_scRNA-seq	2
																				NOTCH1	TICCom_scRNA-seq	1		ITGB2	TICCom_bulk_RNA-seq,TICCom_scRNA-seq	2		MUC5AC	TICCom_bulk_RNA-seq,TICCom_scRNA-seq	2
																				PVR	TICCom_scRNA-seq	1		ITGB4	TICCom_bulk_RNA-seq,TICCom_scRNA-seq	2		NCAM1	TICCom_bulk_RNA-seq,TICCom_scRNA-seq	2
																				RHBDF2	TICCom_scRNA-seq	1		ITGB5	TICCom_bulk_RNA-seq,TICCom_scRNA-seq	2		NGFR	TICCom_scRNA-seq	1
																				SIGLEC1	TICCom_scRNA-seq	1		ITGB6	TICCom_scRNA-seq	1		NMUR1	TICCom_scRNA-seq	1
																				SIGLEC10	TICCom_scRNA-seq	1		ITGB7	TICCom_scRNA-seq	1		NOTCH1	TICCom_scRNA-seq	1
																				SPN	TICCom_scRNA-seq	1		ITGB8	TICCom_scRNA-seq	1		NOTCH3	TICCom_bulk_RNA-seq,TICCom_scRNA-seq	2
																				TREM1	TICCom_scRNA-seq	1		KLRD1	TICCom_scRNA-seq	1		NOTCH4	TICCom_scRNA-seq	1
																				VCAM1	TICCom_scRNA-seq	1		KREMEN1	TICCom_scRNA-seq	1		NRP1	TICCom_bulk_RNA-seq,TICCom_scRNA-seq	2
																								LAMP1	TICCom_bulk_RNA-seq,TICCom_scRNA-seq	2		NT5E	TICCom_bulk_RNA-seq,TICCom_scRNA-seq	2
																								LGR5	TICCom_scRNA-seq	1		OSMR	TICCom_scRNA-seq	1
																								LGR6	TICCom_scRNA-seq	1		PDGFRA	TICCom_bulk_RNA-seq,TICCom_scRNA-seq	2
																								LILRB1	TICCom_scRNA-seq	1		PDGFRB	TICCom_bulk_RNA-seq,TICCom_scRNA-seq	2
																								LILRB2	TICCom_scRNA-seq	1		PLA2R1	TICCom_scRNA-seq	1
																								LRP1	TICCom_bulk_RNA-seq,TICCom_scRNA-seq	2		PLAUR	TICCom_bulk_RNA-seq,TICCom_scRNA-seq	2
																								LSR	TICCom_bulk_RNA-seq,TICCom_scRNA-seq	2		PLD1	TICCom_scRNA-seq	1
																								LTBR	TICCom_scRNA-seq	1		PLSCR4	TICCom_scRNA-seq	1
																								LY96	TICCom_scRNA-seq	1		PLXNA2	TICCom_scRNA-seq	1
																								MCAM	TICCom_scRNA-seq	1		PROCR	TICCom_scRNA-seq	1
																								MERTK	TICCom_scRNA-seq	1		PTGER2	TICCom_scRNA-seq	1
																								MET	TICCom_bulk_RNA-seq,TICCom_scRNA-seq	2		PTGER4	TICCom_scRNA-seq	1
																								MSN	TICCom_scRNA-seq	1		PTPRB	TICCom_scRNA-seq	1
																								NGFR	TICCom_scRNA-seq	1		PTPRF	TICCom_bulk_RNA-seq,TICCom_scRNA-seq	2
																								NOTCH3	TICCom_scRNA-seq	1		PTPRS	TICCom_bulk_RNA-seq,TICCom_scRNA-seq	2
																								NOTCH4	TICCom_scRNA-seq	1		RAMP1	TICCom_scRNA-seq	1
																								NPR1	TICCom_scRNA-seq	1		RAMP2	TICCom_scRNA-seq	1
																								NRP1	TICCom_scRNA-seq	1		RAMP3	TICCom_scRNA-seq	1
																								NRP2	TICCom_bulk_RNA-seq,TICCom_scRNA-seq	2		S1PR1	TICCom_scRNA-seq	1
																								NT5E	TICCom_scRNA-seq	1		SCARB1	TICCom_bulk_RNA-seq,TICCom_scRNA-seq	2
																								PDGFRA	TICCom_scRNA-seq	1		SCTR	TICCom_scRNA-seq	1
																								PDGFRB	TICCom_scRNA-seq	1		SDC1	TICCom_bulk_RNA-seq,TICCom_scRNA-seq	2
																								PECAM1	TICCom_scRNA-seq	1		SDC2	TICCom_bulk_RNA-seq,TICCom_scRNA-seq	2
																								PLAUR	TICCom_scRNA-seq	1		SDC4	TICCom_bulk_RNA-seq,TICCom_scRNA-seq	2
																								PLXNA1	TICCom_bulk_RNA-seq,TICCom_scRNA-seq	2		SELL	TICCom_scRNA-seq	1
																								PLXND1	TICCom_scRNA-seq	1		SLC40A1	TICCom_scRNA-seq	1
																								PTGER2	TICCom_scRNA-seq	1		SMAD3	TICCom_bulk_RNA-seq,TICCom_scRNA-seq	2
																								PTGER4	TICCom_scRNA-seq	1		SORL1	TICCom_bulk_RNA-seq,TICCom_scRNA-seq	2
																								PTK7	TICCom_scRNA-seq	1		TBXA2R	TICCom_scRNA-seq	1
																								PTPRC	TICCom_scRNA-seq	1		TGFBR2	TICCom_bulk_RNA-seq,TICCom_scRNA-seq	2
																								PTPRF	TICCom_scRNA-seq	1		TGFBR3	TICCom_scRNA-seq	1
																								PTPRK	TICCom_scRNA-seq	1		THBD	TICCom_scRNA-seq	1
																								PTPRS	TICCom_bulk_RNA-seq,TICCom_scRNA-seq	2		TIE1	TICCom_scRNA-seq	1
																								PTPRZ1	TICCom_scRNA-seq	1		TLR5	TICCom_scRNA-seq	1
																								RAMP1	TICCom_scRNA-seq	1		TNFRSF11B	TICCom_scRNA-seq	1
																								RAMP2	TICCom_scRNA-seq	1		TNFRSF1B	TICCom_scRNA-seq	1
																								RAMP3	TICCom_scRNA-seq	1		TNFRSF21	TICCom_bulk_RNA-seq,TICCom_scRNA-seq	2
																								RECK	TICCom_scRNA-seq	1		TREM2	TICCom_bulk_RNA-seq,TICCom_scRNA-seq	2
																								RIPK1	TICCom_scRNA-seq	1		TSPAN1	TICCom_bulk_RNA-seq,TICCom_scRNA-seq	2
																								ROBO1	TICCom_scRNA-seq	1		TSPAN15	TICCom_bulk_RNA-seq,TICCom_scRNA-seq	2
																								RPSA	TICCom_bulk_RNA-seq,TICCom_scRNA-seq	2		TYRO3	TICCom_scRNA-seq	1
																								S1PR1	TICCom_scRNA-seq	1		ADORA2B	TICCom_scRNA-seq	1
																								SCARB1	TICCom_scRNA-seq	1		AGR2	TICCom_scRNA-seq	1
																								SDC1	TICCom_bulk_RNA-seq,TICCom_scRNA-seq	2		CADM1	TICCom_bulk_RNA-seq	1
																								SDC2	TICCom_scRNA-seq	1		CD1D	TICCom_scRNA-seq	1
																								SDC3	TICCom_bulk_RNA-seq,TICCom_scRNA-seq	2		CD2	TICCom_scRNA-seq	1
																								SDC4	TICCom_bulk_RNA-seq,TICCom_scRNA-seq	2		CD209	TICCom_scRNA-seq	1
																								SELL	TICCom_scRNA-seq	1		CD27	TICCom_scRNA-seq	1
																								SIRPA	TICCom_scRNA-seq	1		CD34	TICCom_scRNA-seq	1
																								SLC1A5	TICCom_bulk_RNA-seq,TICCom_scRNA-seq	2		CD8A	TICCom_scRNA-seq	1
																								SLC40A1	TICCom_bulk_RNA-seq,TICCom_scRNA-seq	2		CDH1	TICCom_bulk_RNA-seq,TICCom_scRNA-seq	2
																								SORL1	TICCom_scRNA-seq	1		CDH3	TICCom_bulk_RNA-seq,TICCom_scRNA-seq	2
																								SORT1	TICCom_bulk_RNA-seq,TICCom_scRNA-seq	2		CEACAM1	TICCom_bulk_RNA-seq,TICCom_scRNA-seq	2
																								ST14	TICCom_bulk_RNA-seq,TICCom_scRNA-seq	2		CEACAM5	TICCom_bulk_RNA-seq,TICCom_scRNA-seq	2
																								TFRC	TICCom_bulk_RNA-seq,TICCom_scRNA-seq	2		CLEC2D	TICCom_scRNA-seq	1
																								TGFBR1	TICCom_scRNA-seq	1		DCBLD2	TICCom_bulk_RNA-seq,TICCom_scRNA-seq	2
																								TGFBR2	TICCom_bulk_RNA-seq,TICCom_scRNA-seq	2		DSG2	TICCom_bulk_RNA-seq,TICCom_scRNA-seq	2
																								TGFBR3	TICCom_scRNA-seq	1		EPHB4	TICCom_bulk_RNA-seq,TICCom_scRNA-seq	2
																								TLR1	TICCom_scRNA-seq	1		EPOR	TICCom_scRNA-seq	1
																								TLR2	TICCom_scRNA-seq	1		ESAM	TICCom_bulk_RNA-seq,TICCom_scRNA-seq	2
																								TLR4	TICCom_scRNA-seq	1		F11R	TICCom_bulk_RNA-seq,TICCom_scRNA-seq	2
																								TNFRSF11B	TICCom_scRNA-seq	1		HMMR	TICCom_scRNA-seq	1
																								TNFRSF12A	TICCom_scRNA-seq	1		ICAM1	TICCom_scRNA-seq	1
																								TNFRSF1B	TICCom_scRNA-seq	1		IL2RG	TICCom_bulk_RNA-seq,TICCom_scRNA-seq	2
																								TNFRSF21	TICCom_bulk_RNA-seq,TICCom_scRNA-seq	2		JAM2	TICCom_scRNA-seq	1
																								TREM2	TICCom_bulk_RNA-seq,TICCom_scRNA-seq	2		KLRB1	TICCom_scRNA-seq	1
																								TRPM2	TICCom_scRNA-seq	1		KLRG1	TICCom_scRNA-seq	1
																								TSPAN1	TICCom_bulk_RNA-seq,TICCom_scRNA-seq	2		MUC1	TICCom_bulk_RNA-seq,TICCom_scRNA-seq	2
																								VSIR	TICCom_scRNA-seq	1		PLXNB1	TICCom_scRNA-seq	1
																								ALOX5	TICCom_scRNA-seq	1		PODXL	TICCom_scRNA-seq	1
																								CADM1	TICCom_scRNA-seq	1		PTPRM	TICCom_bulk_RNA-seq,TICCom_scRNA-seq	2
																								CD2	TICCom_scRNA-seq	1		RHBDL2	TICCom_scRNA-seq	1
																								CD200R1	TICCom_scRNA-seq	1		VCAM1	TICCom_scRNA-seq	1
																								CD28	TICCom_scRNA-seq	1
																								CD34	TICCom_scRNA-seq	1
																								CD72	TICCom_scRNA-seq	1
																								CD99	TICCom_bulk_RNA-seq,TICCom_scRNA-seq	2
																								CDH1	TICCom_bulk_RNA-seq,TICCom_scRNA-seq	2
																								CLEC2D	TICCom_scRNA-seq	1
																								ICAM1	TICCom_bulk_RNA-seq,TICCom_scRNA-seq	2
																								ICAM2	TICCom_scRNA-seq	1
																								IL2RA	TICCom_scRNA-seq	1
																								JAG1	TICCom_bulk_RNA-seq,TICCom_scRNA-seq	2
																								KLRB1	TICCom_scRNA-seq	1
																								KLRG1	TICCom_scRNA-seq	1
																								MPZL1	TICCom_bulk_RNA-seq,TICCom_scRNA-seq	2
																								MUC1	TICCom_bulk_RNA-seq,TICCom_scRNA-seq	2
																								PILRA	TICCom_scRNA-seq	1
																								PLXNB1	TICCom_scRNA-seq	1
																								PODXL	TICCom_scRNA-seq	1
																								PTPRM	TICCom_scRNA-seq	1
																								RHBDF2	TICCom_scRNA-seq	1
																								SIGLEC10	TICCom_scRNA-seq	1
																								SPN	TICCom_scRNA-seq	1
																								THY1	TICCom_scRNA-seq	1
																								VCAM1	TICCom_scRNA-seq	1

## Sheet: Table 3
Table 3. Positive receptor-to-TF mediators
Breast cancer					Colorectal cancer					Glioblastoma					Leukemia					Lung cancer					Melanoma					Ovarian cancer					Pancreatic cancer
Gene1	Gene2	Type	Source		Gene1	Gene2	Type	Source		Gene1	Gene2	Type	Source		Gene1	Gene2	Type	Source		Gene1	Gene2	Type	Source		Gene1	Gene2	Type	Source		Gene1	Gene2	Type	Source		Gene1	Gene2	Type	Source
PTN	FCGR1A	controls-state-change-of	Pathway Commons		ESR2	IGKV4-1	controls-state-change-of	Pathway Commons		GNB4	LAT2	controls-state-change-of	Pathway Commons		PIP4K2A	FRS2	catalysis-precedes	Pathway Commons		NPM1	WASF2	controls-state-change-of	Pathway Commons		PTN	FCGR1A	controls-state-change-of	Pathway Commons		PTN	FCGR1A	controls-state-change-of	Pathway Commons		GRAP2	GNG12	controls-state-change-of	Pathway Commons
CD247	IGHV4-59	controls-state-change-of	Pathway Commons		CD247	IGHV4-59	controls-state-change-of	Pathway Commons		PIK3R4	FCGR2A	controls-state-change-of	Pathway Commons		PIK3CG	LCP2	controls-state-change-of	Pathway Commons		AREG	GNB1	controls-state-change-of	Pathway Commons		MYO18A	MDK	controls-state-change-of	Pathway Commons		PIK3CG	LCP2	controls-state-change-of	Pathway Commons		MYO18A	MDK	controls-state-change-of	Pathway Commons
GNG3	IGKV3-20	controls-state-change-of	Pathway Commons		MYO18A	MDK	controls-state-change-of	Pathway Commons		CSF1	BRK1	controls-state-change-of	Pathway Commons		SOS1	DAPP1	controls-state-change-of	Pathway Commons		HCK	BAIAP2	controls-state-change-of	Pathway Commons		PIK3CG	LCP2	controls-state-change-of	Pathway Commons		SYK	GNG11	controls-state-change-of	Pathway Commons		FGF18	INPP5D	catalysis-precedes	Pathway Commons
KLRC2	IGKV2-30	controls-state-change-of	Pathway Commons		IGHV4-34	VAV1	controls-state-change-of	Pathway Commons		PIK3R4	FCGR1A	controls-state-change-of	Pathway Commons		CLTC	AKT2	controls-state-change-of	Pathway Commons		B2M	CUX1	controls-state-change-of	Pathway Commons		SOS1	DAPP1	controls-state-change-of	Pathway Commons		IGHG2	CNTRL	controls-state-change-of	Pathway Commons		EPOR	FGF9	controls-state-change-of	Pathway Commons
IGHV4-34	VAV1	controls-state-change-of	Pathway Commons		PIK3CG	LCP2	controls-state-change-of	Pathway Commons		NTRK2	VAV2	controls-state-change-of	Pathway Commons		AREG	GNB1	controls-state-change-of	Pathway Commons		HLA-E	CUX1	controls-state-change-of	Pathway Commons		AXL	FGFR1OP2	controls-state-change-of	Pathway Commons		GNB4	LAT2	controls-state-change-of	Pathway Commons		PIK3R3	CD28	in-complex-with	Pathway Commons
EREG	IGKV1-5	controls-state-change-of	Pathway Commons		PIK3CG	IGLV1-40	controls-state-change-of	Pathway Commons		PDGFB	FCGR1A	controls-state-change-of	Pathway Commons		PIK3R3	CD28	in-complex-with	Pathway Commons		PIP4K2A	HBEGF	catalysis-precedes	Pathway Commons		STRN	LCK	controls-state-change-of	Pathway Commons		LYN	GRAP2	controls-state-change-of	Pathway Commons		PIK3R1	KIT	in-complex-with	Pathway Commons
FYN	IGLV2-14	controls-state-change-of	Pathway Commons		KLB	IGLC6	controls-state-change-of	Pathway Commons		HCK	TRIM24	controls-state-change-of	Pathway Commons		STRN	LCK	controls-state-change-of	Pathway Commons		AREG	FCGR2A	controls-state-change-of	Pathway Commons		LRRFIP1	CYFIP2	controls-state-change-of	Pathway Commons		PIK3R3	CD28	in-complex-with	Pathway Commons		GNG12	FGF7	controls-state-change-of	Pathway Commons
IGHG4	IGHV3-7	controls-state-change-of	Pathway Commons		EREG	IGKV1-5	controls-state-change-of	Pathway Commons		HCK	BAIAP2	controls-state-change-of	Pathway Commons		GRAP2	GNB1	controls-state-change-of	Pathway Commons		CUX1	BAIAP2	controls-state-change-of	Pathway Commons		IL33	MDK	controls-state-change-of	Pathway Commons		STRN	LCK	controls-state-change-of	Pathway Commons		PDGFRB	AKT2	controls-state-change-of	Pathway Commons
GRAP2	IGHV4-59	controls-state-change-of	Pathway Commons		FYN	IGLV2-14	controls-state-change-of	Pathway Commons		FN1	LCP2	controls-state-change-of	Pathway Commons		FRS2	GNG7	controls-state-change-of	Pathway Commons		CD86	WASF2	controls-state-change-of	Pathway Commons		INPP5D	FGFR1OP2	controls-state-change-of	Pathway Commons		GNB4	IGKC	controls-state-change-of	Pathway Commons		IL33	MDK	controls-state-change-of	Pathway Commons
IGLV1-47	TXK	controls-state-change-of	Pathway Commons		CD19	ALKAL2	controls-state-change-of	Pathway Commons		MET	FGF2	controls-state-change-of	Pathway Commons		ICOS	CYFIP2	controls-state-change-of	Pathway Commons		STAT3	SH3KBP1	controls-state-change-of	Pathway Commons		BAG4	FGF2	controls-state-change-of	Pathway Commons		PDGFB	MDK	controls-state-change-of	Pathway Commons		PIK3R1	FCGR3A	controls-state-change-of	Pathway Commons
AREG	IGHV3-11	controls-state-change-of	Pathway Commons		IGHG2	CNTRL	controls-state-change-of	Pathway Commons		GNG4	VAV3	controls-state-change-of	Pathway Commons		PIK3R1	FCGR3A	controls-state-change-of	Pathway Commons		MDH1	UGDH	catalysis-precedes	Pathway Commons		FGFR1	IGKC	controls-state-change-of	Pathway Commons		FGF20	GAB2	controls-state-change-of	Pathway Commons		FCGR3A	CYFIP2	controls-state-change-of	Pathway Commons
IL1RL1	IGHV3-48	controls-state-change-of	Pathway Commons		GNB4	LAT2	controls-state-change-of	Pathway Commons		PDGFB	BAIAP2	controls-state-change-of	Pathway Commons		FCGR3A	CYFIP2	controls-state-change-of	Pathway Commons		FCGR2A	GNG5	controls-state-change-of	Pathway Commons		PIK3R1	FCGR3A	controls-state-change-of	Pathway Commons		FGFR1	IGKC	controls-state-change-of	Pathway Commons		GNG11	CD79A	controls-state-change-of	Pathway Commons
MYD88	IGHV3-33	controls-state-change-of	Pathway Commons		FLT3LG	KLB	controls-state-change-of	Pathway Commons		CD86	WASF2	controls-state-change-of	Pathway Commons		SYK	ERLIN2	controls-state-change-of	Pathway Commons		ANAPC11	UBE2D1	in-complex-with	Pathway Commons		IL33	SH3KBP1	controls-state-change-of	Pathway Commons		PIK3R1	FCGR3A	controls-state-change-of	Pathway Commons		CSF1R	CD28	controls-state-change-of	Pathway Commons
EPGN	IGHG2	controls-state-change-of	Pathway Commons		IGHG4	IGHV3-7	controls-state-change-of	Pathway Commons		PIP5K1B	SYK	catalysis-precedes	Pathway Commons		GNG10	GRAP2	controls-state-change-of	Pathway Commons		VEGFA	FCGR3A	controls-state-change-of	Pathway Commons		CNTRL	INPPL1	catalysis-precedes	Pathway Commons		FCGR3A	CYFIP2	controls-state-change-of	Pathway Commons		CD28	PLCG1	controls-state-change-of	Pathway Commons
FGFR1	CD80	controls-state-change-of	Pathway Commons		ALKAL2	IGHM	controls-state-change-of	Pathway Commons		NFKB1	UBC	interacts-with	APPIC		KLRD1	GNG10	controls-state-change-of	Pathway Commons		CDC37	LRRFIP1	controls-state-change-of	Pathway Commons		FCGR3A	CYFIP2	controls-state-change-of	Pathway Commons		PDGFB	FCGR1A	controls-state-change-of	Pathway Commons		MET	FGF7	controls-state-change-of	Pathway Commons
IGHG1	IGHV1-2	controls-state-change-of	Pathway Commons		AXL	FGFR1OP2	controls-state-change-of	Pathway Commons		PDGFB	GNG12	controls-state-change-of	Pathway Commons		HCK	TRIM24	controls-state-change-of	Pathway Commons		RAC2	GRB2	controls-state-change-of	Pathway Commons		FCGR1A	VAV1	controls-state-change-of	Pathway Commons		BDNF	GNGT2	controls-state-change-of	Pathway Commons		KIT	BAIAP2	controls-state-change-of	Pathway Commons
FN1	IGHV1-2	controls-state-change-of	Pathway Commons		GRAP2	IGHV4-59	controls-state-change-of	Pathway Commons		MOV10	AGO2	in-complex-with	Pathway Commons		PIP4K2B	GNB1	catalysis-precedes	Pathway Commons		CLTC	TFG	controls-state-change-of	Pathway Commons		TREM2	FGFR1OP2	controls-state-change-of	Pathway Commons		GNG10	GRAP2	controls-state-change-of	Pathway Commons		HCK	BAIAP2	controls-state-change-of	Pathway Commons
IGHV3-48	FYN	controls-state-change-of	Pathway Commons		LYN	GRAP2	controls-state-change-of	Pathway Commons		STAT1	GNB5	controls-state-change-of	Pathway Commons		GNG7	LCK	controls-state-change-of	Pathway Commons		SDHC	SDHD	in-complex-with	Pathway Commons		HCK	TRIM24	controls-state-change-of	Pathway Commons		FCGR1A	VAV1	controls-state-change-of	Pathway Commons		ERBB3	MDK	controls-state-change-of	Pathway Commons
IL33	IGKV4-1	controls-state-change-of	Pathway Commons		FGFR1	CD80	controls-state-change-of	Pathway Commons		PIP5K1B	IRS2	catalysis-precedes	Pathway Commons		LCK	PIK3R3	in-complex-with	Pathway Commons		PIP4K2A	AREG	catalysis-precedes	Pathway Commons		ERBB3	MDK	controls-state-change-of	Pathway Commons		KLRD1	GNG10	controls-state-change-of	Pathway Commons		LCK	PIK3R3	in-complex-with	Pathway Commons
HCK	IGKV3-20	controls-state-change-of	Pathway Commons		NTRK2	AKT3	controls-state-change-of	Pathway Commons		MET	CD86	controls-state-change-of	Pathway Commons		SOS1	GNG10	controls-state-change-of	Pathway Commons		AREG	TFG	controls-state-change-of	Pathway Commons		GNG7	LCK	controls-state-change-of	Pathway Commons		CSF1R	CD28	controls-state-change-of	Pathway Commons		IRS2	INPP5J	catalysis-precedes	Pathway Commons
CD80	IGHG3	controls-state-change-of	Pathway Commons		GNB4	IGKC	controls-state-change-of	Pathway Commons		IL34	CD247	controls-state-change-of	Pathway Commons		IL1RAP	CYFIP2	controls-state-change-of	Pathway Commons		HCK	CUX1	controls-state-change-of	Pathway Commons		PIP5K1B	STRN	catalysis-precedes	Pathway Commons		MET	FGF7	controls-state-change-of	Pathway Commons		MET	FGF2	controls-state-change-of	Pathway Commons
FGFR1	IGKC	controls-state-change-of	Pathway Commons		CNTRL	IGHV3-30	controls-state-change-of	Pathway Commons		GNB4	PLCG2	controls-state-change-of	Pathway Commons		DCTN1	RAC1	controls-state-change-of	Pathway Commons		PIK3AP1	FCGR2A	controls-state-change-of	Pathway Commons		FN1	LCP2	controls-state-change-of	Pathway Commons		GRB2	GNB3	controls-state-change-of	Pathway Commons		MET	TEC	controls-state-change-of	Pathway Commons
PIK3R1	FCGR3A	controls-state-change-of	Pathway Commons		KDR	IGLV2-14	controls-state-change-of	Pathway Commons		JAK2	CD247	controls-state-change-of	Pathway Commons		IRAK4	ZMYM2	controls-state-change-of	Pathway Commons		CD86	FGFR1OP2	controls-state-change-of	Pathway Commons		THOC5	CD86	controls-state-change-of	Pathway Commons		PTN	VAV2	controls-state-change-of	Pathway Commons		MYO18A	GNG2	controls-state-change-of	Pathway Commons
GAB3	IGHV3-9	controls-state-change-of	Pathway Commons		ICOS	CYFIP2	controls-state-change-of	Pathway Commons		GNG12	BAIAP2	controls-state-change-of	Pathway Commons		TYROBP	LAT	controls-state-change-of	Pathway Commons		LAT2	LRRFIP1	controls-state-change-of	Pathway Commons		MDK	GAB2	controls-state-change-of	Pathway Commons		GNG7	LCK	controls-state-change-of	Pathway Commons		KLRK1	FGF10	controls-state-change-of	Pathway Commons
FGF7	IGLV3-25	controls-state-change-of	Pathway Commons		PDGFB	MDK	controls-state-change-of	Pathway Commons		CSF1	GNB4	controls-state-change-of	Pathway Commons		IRAK4	ERLIN2	controls-state-change-of	Pathway Commons		SUCLG1	SDHC	catalysis-precedes	Pathway Commons		PIP4K2A	HBEGF	catalysis-precedes	Pathway Commons		LCK	PIK3R3	in-complex-with	Pathway Commons		IRS1	PLCG1	controls-state-change-of	Pathway Commons
KLRK1	IGLV3-1	controls-state-change-of	Pathway Commons		IL33	IGKV4-1	controls-state-change-of	Pathway Commons		FGFR3	LCK	controls-state-change-of	Pathway Commons		PIK3C3	DAPP1	controls-state-change-of	Pathway Commons		RBX1	SKP1	in-complex-with	Pathway Commons		TYROBP	LAT	controls-state-change-of	Pathway Commons		IRS1	SH3KBP1	controls-state-change-of	Pathway Commons		AREG	FCGR2A	controls-state-change-of	Pathway Commons
FCGR1A	VAV1	controls-state-change-of	Pathway Commons		PIK3R1	KIT	in-complex-with	Pathway Commons		MET	GNB4	controls-state-change-of	Pathway Commons		TRIP11	KRAS	controls-state-change-of	Pathway Commons		NPM1	FCGR2A	controls-state-change-of	Pathway Commons		MYD88	VAV1	controls-state-change-of	Pathway Commons		FN1	LCP2	controls-state-change-of	Pathway Commons		HGF	CD79A	controls-state-change-of	Pathway Commons
CSF1R	CD28	controls-state-change-of	Pathway Commons		IL33	MDK	controls-state-change-of	Pathway Commons		NTRK2	CD86	controls-state-change-of	Pathway Commons		GNB1	TRIM24	controls-state-change-of	Pathway Commons		GRB2	BAIAP2	controls-state-change-of	Pathway Commons		TRIP11	KRAS	controls-state-change-of	Pathway Commons		CNTRL	FGF20	controls-state-change-of	Pathway Commons		GRAP2	AKT2	controls-state-change-of	Pathway Commons
TYROBP	IGKV1D-39	controls-state-change-of	Pathway Commons		HCK	IGKV3-20	controls-state-change-of	Pathway Commons		GNG4	PLCG2	controls-state-change-of	Pathway Commons		SHC1	AKT2	controls-state-change-of	Pathway Commons		PIP4K2A	PIK3AP1	catalysis-precedes	Pathway Commons		GNB1	TRIM24	controls-state-change-of	Pathway Commons		CD3G	IGLC2	controls-state-change-of	Pathway Commons		PDGFA	FGF10	controls-state-change-of	Pathway Commons
IGKV1-33	FGFR4	controls-state-change-of	Pathway Commons		INPP5D	FGFR1OP2	controls-state-change-of	Pathway Commons		FN1	FGF2	controls-state-change-of	Pathway Commons		IRAK4	GNG10	controls-state-change-of	Pathway Commons		CPSF6	SH3KBP1	controls-state-change-of	Pathway Commons		CNTRL	PTEN	catalysis-precedes	Pathway Commons		GNB4	ABI1	controls-state-change-of	Pathway Commons		IRS2	AKT2	controls-state-change-of	Pathway Commons
GRAP2	IGKV2D-28	controls-state-change-of	Pathway Commons		CD80	IGHG3	controls-state-change-of	Pathway Commons		PLCG2	SYK	controls-state-change-of	Pathway Commons		FYN	KRAS	controls-state-change-of	Pathway Commons		CSF1R	ABI1	controls-state-change-of	Pathway Commons		SHC1	AKT2	controls-state-change-of	Pathway Commons		PDGFRA	FGF20	controls-state-change-of	Pathway Commons		CD19	CD79B	controls-state-change-of	Pathway Commons
CD80	IGHG1	controls-state-change-of	Pathway Commons		FGFR1	IGKC	controls-state-change-of	Pathway Commons		PIK3R4	FGF2	controls-state-change-of	Pathway Commons		GRAP2	AKT2	controls-state-change-of	Pathway Commons		EML4	BRK1	controls-state-change-of	Pathway Commons		PIP5K1B	SYK	catalysis-precedes	Pathway Commons		PIK3CB	PDGFB	in-complex-with	Pathway Commons		TRAT1	CD247	controls-state-change-of	Pathway Commons
IGKV4-1	GNG2	controls-state-change-of	Pathway Commons		PIK3R1	FCGR3A	controls-state-change-of	Pathway Commons		VEGFA	GNG2	controls-state-change-of	Pathway Commons		TYROBP	CD28	controls-state-change-of	Pathway Commons		UQCRC1	SDHD	catalysis-precedes	Pathway Commons		FYN	KRAS	controls-state-change-of	Pathway Commons		GAB3	TEC	controls-state-change-of	Pathway Commons		TRAF6	ITK	controls-state-change-of	Pathway Commons
IGLV1-44	CD80	controls-state-change-of	Pathway Commons		IL33	SH3KBP1	controls-state-change-of	Pathway Commons		FCGR1A	GNG2	controls-state-change-of	Pathway Commons		KLRD1	ABI2	controls-state-change-of	Pathway Commons		KIF5B	FCGR3A	controls-state-change-of	Pathway Commons		MOV10	AGO2	in-complex-with	Pathway Commons		MET	TEC	controls-state-change-of	Pathway Commons		BDNF	CD28	controls-state-change-of	Pathway Commons
FYN	IGHV3-23	controls-state-change-of	Pathway Commons		FCGR3A	CYFIP2	controls-state-change-of	Pathway Commons		GNB2	PLCG2	controls-state-change-of	Pathway Commons		STAT1	GNB5	controls-state-change-of	Pathway Commons		CD86	FCGR2A	controls-state-change-of	Pathway Commons		PIK3R5	CD79B	controls-state-change-of	Pathway Commons		MDK	GAB2	controls-state-change-of	Pathway Commons		KDR	FGF7	controls-state-change-of	Pathway Commons
IGLV1-47	VAV1	controls-state-change-of	Pathway Commons		MDK	GNG8	controls-state-change-of	Pathway Commons		FCGR1A	FGF20	controls-state-change-of	Pathway Commons		PIK3CA	ERLIN2	controls-state-change-of	Pathway Commons		CLIP1	MAPK1	controls-phosphorylation-of	Pathway Commons		ERBB3	LRRFIP1	controls-state-change-of	Pathway Commons		PIP4K2A	HBEGF	catalysis-precedes	Pathway Commons		PIP4K2B	CD19	catalysis-precedes	Pathway Commons
FN1	LCP2	controls-state-change-of	Pathway Commons		PDGFB	FCGR1A	controls-state-change-of	Pathway Commons		FGFR3	BLNK	controls-state-change-of	Pathway Commons		IRS2	AKT2	controls-state-change-of	Pathway Commons		IRS2	CD86	controls-state-change-of	Pathway Commons		STAT3	NCKAP1	controls-state-change-of	Pathway Commons		AREG	VAV2	controls-state-change-of	Pathway Commons		FCGR2A	CD3G	controls-state-change-of	Pathway Commons
IGHG4	IGKV2-30	controls-state-change-of	Pathway Commons		ESR2	KLB	controls-state-change-of	Pathway Commons		PIK3AP1	FCGR2A	controls-state-change-of	Pathway Commons		TRAT1	CD247	controls-state-change-of	Pathway Commons		FCGR3A	RHOA	controls-state-change-of	Pathway Commons		VEGFA	CNTRL	controls-state-change-of	Pathway Commons		GNGT2	FGF7	controls-state-change-of	Pathway Commons		KLRC2	FGF10	controls-state-change-of	Pathway Commons
TRAT1	IGHV3-9	controls-state-change-of	Pathway Commons		GNG11	CD79A	controls-state-change-of	Pathway Commons		HLA-E	FGFR3	controls-state-change-of	Pathway Commons		ICOS	GNB5	controls-state-change-of	Pathway Commons		PIK3AP1	RAC1	controls-state-change-of	Pathway Commons		HCK	PTEN	catalysis-precedes	Pathway Commons		PIK3R5	IGHG1	controls-state-change-of	Pathway Commons		KITLG	AKT2	controls-state-change-of	Pathway Commons
ESR1	IGHV4-34	controls-state-change-of	Pathway Commons		GNG10	GRAP2	controls-state-change-of	Pathway Commons		CSF1	CD86	controls-state-change-of	Pathway Commons		TRAF6	ITK	controls-state-change-of	Pathway Commons		GNB2	NCKAP1L	controls-state-change-of	Pathway Commons		FCGR2A	CD3G	controls-state-change-of	Pathway Commons		TYROBP	LAT	controls-state-change-of	Pathway Commons		FGF10	LCK	controls-state-change-of	Pathway Commons
PDGFRB	IGKV3-15	controls-state-change-of	Pathway Commons		FCGR1A	VAV1	controls-state-change-of	Pathway Commons		FN1	C3	interacts-with	APPIC		CNTRL	ABI2	controls-state-change-of	Pathway Commons		IRAK1	LAT2	controls-state-change-of	Pathway Commons		FGFR1	GNB1	controls-state-change-of	Pathway Commons		MYD88	VAV1	controls-state-change-of	Pathway Commons		TRAT1	LAT	controls-state-change-of	Pathway Commons
IGLV3-1	PLCG2	controls-state-change-of	Pathway Commons		FGFR1OP2	ITK	controls-state-change-of	Pathway Commons		SUCLG1	SDHC	catalysis-precedes	Pathway Commons		PIP4K2A	TRAF6	catalysis-precedes	Pathway Commons		UBE2E1	ANAPC16	in-complex-with	Pathway Commons		INPPL1	MYO18A	controls-state-change-of	Pathway Commons		AREG	FCGR2A	controls-state-change-of	Pathway Commons		PDGFRA	MDK	controls-state-change-of	Pathway Commons
CD3G	IGLC2	controls-state-change-of	Pathway Commons		KLRD1	GNG10	controls-state-change-of	Pathway Commons		GNB4	CD247	controls-state-change-of	Pathway Commons		TRAT1	LAT	controls-state-change-of	Pathway Commons		GNG5	FGFR1OP2	controls-state-change-of	Pathway Commons		TREM2	DAPP1	controls-state-change-of	Pathway Commons		PIP4K2A	GNG11	catalysis-precedes	Pathway Commons		SH2D2A	CD79A	controls-state-change-of	Pathway Commons
VEGFA	IGKV2D-28	controls-state-change-of	Pathway Commons		CSF1R	CD28	controls-state-change-of	Pathway Commons		NTRK3	CD86	controls-state-change-of	Pathway Commons		MDH1	UGDH	catalysis-precedes	Pathway Commons		RAC2	FCGR2A	controls-state-change-of	Pathway Commons		IL33	FCGR1A	controls-state-change-of	Pathway Commons		GAB3	FGFR1	controls-state-change-of	Pathway Commons		FGF9	FCGR2A	controls-state-change-of	Pathway Commons
CSF1R	IGKV2-29	controls-state-change-of	Pathway Commons		IGHV4-34	AKT3	controls-state-change-of	Pathway Commons		LAT2	SYK	controls-state-change-of	Pathway Commons		SH2D2A	RAC1	controls-state-change-of	Pathway Commons		FGFR1OP2	ABI1	controls-state-change-of	Pathway Commons		STAT3	SH3KBP1	controls-state-change-of	Pathway Commons		TYROBP	CD28	controls-state-change-of	Pathway Commons		VEGFA	FGF7	controls-state-change-of	Pathway Commons
IGHG4	GNG4	controls-state-change-of	Pathway Commons		TREM2	FGFR1OP2	controls-state-change-of	Pathway Commons		GNG4	FGF20	controls-state-change-of	Pathway Commons		PIK3R3	LCP2	controls-state-change-of	Pathway Commons		TYROBP	ABI1	controls-state-change-of	Pathway Commons		VEGFA	GNG7	controls-state-change-of	Pathway Commons		RAC2	IGHG2	controls-state-change-of	Pathway Commons		EGFR	TEC	controls-state-change-of	Pathway Commons
TYROBP	LAT	controls-state-change-of	Pathway Commons		IGHV3-33	MYO18A	controls-state-change-of	Pathway Commons		HSP90AB1	TP53	in-complex-with	Pathway Commons		PIK3R4	SHC1	controls-state-change-of	Pathway Commons		FGFR1OP2	GNG5	controls-state-change-of	Pathway Commons		EREG	IGHD	controls-state-change-of	Pathway Commons		PIK3R5	CD79B	controls-state-change-of	Pathway Commons		KLRC2	CD28	controls-state-change-of	Pathway Commons
MYD88	VAV1	controls-state-change-of	Pathway Commons		IGLV3-19	GNG8	controls-state-change-of	Pathway Commons		EREG	GNG2	controls-state-change-of	Pathway Commons		CBL	GRAP2	controls-state-change-of	Pathway Commons		CD86	LAT2	controls-state-change-of	Pathway Commons		SH2D2A	CD79A	controls-state-change-of	Pathway Commons		SH2D2A	GNB4	controls-state-change-of	Pathway Commons		FGFR2	ITK	controls-state-change-of	Pathway Commons
IGLV3-1	FGFR1	controls-state-change-of	Pathway Commons		CD80	IGHG1	controls-state-change-of	Pathway Commons		GAB3	FCGR2A	controls-state-change-of	Pathway Commons		IL1RAP	ERLIN2	controls-state-change-of	Pathway Commons		LAT2	RAC1	controls-state-change-of	Pathway Commons		ERBB3	FGFR1OP2	controls-state-change-of	Pathway Commons		DVL1	FGF20	catalysis-precedes	Pathway Commons		FLT3LG	PTN	controls-state-change-of	Pathway Commons
AREG	FCGR2A	controls-state-change-of	Pathway Commons		GNG7	LCK	controls-state-change-of	Pathway Commons		GNB4	VAV2	controls-state-change-of	Pathway Commons		DLG3	KRAS	controls-state-change-of	Pathway Commons		RAC2	TFG	controls-state-change-of	Pathway Commons		PTN	DAPP1	controls-state-change-of	Pathway Commons		DVL1	IGHG2	catalysis-precedes	Pathway Commons		TRAT1	FGFR2	controls-state-change-of	Pathway Commons
PTN	IGLV2-23	controls-state-change-of	Pathway Commons		IGKV4-1	GNG2	controls-state-change-of	Pathway Commons		KITLG	VAV2	controls-state-change-of	Pathway Commons		JAK2	CD247	controls-state-change-of	Pathway Commons		ZMYM2	WASF2	controls-state-change-of	Pathway Commons		FGF2	AKT3	controls-state-change-of	Pathway Commons		VAV1	GNB5	controls-state-change-of	Pathway Commons		MDK	SOS1	controls-state-change-of	Pathway Commons
FGFR4	IGHG1	controls-state-change-of	Pathway Commons		IGKV1-12	GRAP2	controls-state-change-of	Pathway Commons		NTRK3	WASF2	controls-state-change-of	Pathway Commons		KLRD1	LCK	controls-state-change-of	Pathway Commons		VEGFA	GNG5	controls-state-change-of	Pathway Commons		BAG4	NRAS	controls-state-change-of	Pathway Commons		STAT1	GNB5	controls-state-change-of	Pathway Commons		GNG12	BAIAP2	controls-state-change-of	Pathway Commons
GAB3	FGFR1	controls-state-change-of	Pathway Commons		PIK3C3	IGKV4-1	controls-state-change-of	Pathway Commons		MYD88	INPP5D	catalysis-precedes	Pathway Commons		PIK3CD	FYN	controls-state-change-of	Pathway Commons		HCK	ABI1	controls-state-change-of	Pathway Commons		FLT3LG	PTN	controls-state-change-of	Pathway Commons		FGFR1	BLNK	controls-state-change-of	Pathway Commons		KLRD1	LCK	controls-state-change-of	Pathway Commons
HCK	IGKV2-29	controls-state-change-of	Pathway Commons		GNG7	IGHV3-33	controls-state-change-of	Pathway Commons		FN1	GNB2	controls-state-change-of	Pathway Commons		ICOS	GNG2	controls-state-change-of	Pathway Commons		NPM1	SH3KBP1	controls-state-change-of	Pathway Commons		SOS1	INPPL1	catalysis-precedes	Pathway Commons		PIK3AP1	FGF7	controls-state-change-of	Pathway Commons		VEGFA	FCGR3A	controls-state-change-of	Pathway Commons
IGLV3-1	FYN	controls-state-change-of	Pathway Commons		NRG1	IGLV2-8	controls-state-change-of	Pathway Commons		EGF	GNG4	controls-state-change-of	Pathway Commons		FRS2	TFG	controls-state-change-of	Pathway Commons		HSP90AB1	HSPA1A	in-complex-with	Pathway Commons		MDK	SOS1	controls-state-change-of	Pathway Commons		VEGFA	CNTRL	controls-state-change-of	Pathway Commons		FGFR4	TXK	controls-state-change-of	Pathway Commons
TYROBP	IGKV3-11	controls-state-change-of	Pathway Commons		FYN	IGHV3-23	controls-state-change-of	Pathway Commons		PIP5K1B	GNB4	catalysis-precedes	Pathway Commons		CD247	AKT3	controls-state-change-of	Pathway Commons		IL1RAP	CD86	controls-state-change-of	Pathway Commons		CNTRL	INPP5D	catalysis-precedes	Pathway Commons		BDNF	CD28	controls-state-change-of	Pathway Commons		IRS2	FGFR1	controls-state-change-of	Pathway Commons
TYROBP	CD28	controls-state-change-of	Pathway Commons		MYO18A	IGHV3-30	controls-state-change-of	Pathway Commons		GRIN2B	KRAS	controls-state-change-of	Pathway Commons		PIK3R4	TXK	controls-state-change-of	Pathway Commons		GNG5	CD86	controls-state-change-of	Pathway Commons		JAK2	CD247	controls-state-change-of	Pathway Commons		PIP4K2A	TRAF6	catalysis-precedes	Pathway Commons		TRAT1	GNG11	controls-state-change-of	Pathway Commons
RAC2	IGHG2	controls-state-change-of	Pathway Commons		GAB1	FYN	controls-state-change-of	Pathway Commons		CD86	FCGR2A	controls-state-change-of	Pathway Commons		TYROBP	CYFIP2	controls-state-change-of	Pathway Commons		MDH1	NDUFS3	catalysis-precedes	Pathway Commons		FN1	NCKAP1L	controls-state-change-of	Pathway Commons		FCGR2A	CD3G	controls-state-change-of	Pathway Commons		FGF10	INPP5J	catalysis-precedes	Pathway Commons
IGHG2	ERLIN2	controls-state-change-of	Pathway Commons		IGHV3-23	SHC1	controls-state-change-of	Pathway Commons		MET	VAV2	controls-state-change-of	Pathway Commons		GAB3	SHC1	controls-state-change-of	Pathway Commons		HCK	CD86	controls-state-change-of	Pathway Commons		GAB2	FCGR3A	controls-state-change-of	Pathway Commons		TREM2	DAPP1	controls-state-change-of	Pathway Commons		FGFR3	LCK	controls-state-change-of	Pathway Commons
IGKV1-5	PLCG2	controls-state-change-of	Pathway Commons		FN1	LCP2	controls-state-change-of	Pathway Commons		MYD88	GNG12	controls-state-change-of	Pathway Commons		CBL	TXK	controls-state-change-of	Pathway Commons		MYD88	FCGR3A	controls-state-change-of	Pathway Commons		PIP4K2A	IGKC	catalysis-precedes	Pathway Commons		GAB2	GRAP2	controls-state-change-of	Pathway Commons		HGF	CD247	controls-state-change-of	Pathway Commons
FGFR1	BLNK	controls-state-change-of	Pathway Commons		IGLV3-1	PLCG2	controls-state-change-of	Pathway Commons		NTRK3	GNB4	controls-state-change-of	Pathway Commons		AREG	ITK	controls-state-change-of	Pathway Commons		LRRFIP1	LAT2	controls-state-change-of	Pathway Commons		KLRD1	LCK	controls-state-change-of	Pathway Commons		IRS2	IGHG3	controls-state-change-of	Pathway Commons		AREG	ITK	controls-state-change-of	Pathway Commons
TRAT1	CD247	controls-state-change-of	Pathway Commons		CD3G	IGLC2	controls-state-change-of	Pathway Commons		NTRK2	GNG4	controls-state-change-of	Pathway Commons		SHC1	CD28	controls-state-change-of	Pathway Commons		HBEGF	LCP2	controls-state-change-of	Pathway Commons		GNG7	PTEN	catalysis-precedes	Pathway Commons		MET	CD86	controls-state-change-of	Pathway Commons		CD28	CD79A	controls-state-change-of	Pathway Commons
GRAP2	IGHV3-30	controls-state-change-of	Pathway Commons		GNB4	ABI1	controls-state-change-of	Pathway Commons		GNG4	TRIM24	controls-state-change-of	Pathway Commons		CAMK2G	KRAS	controls-state-change-of	Pathway Commons		HLA-E	GNG5	controls-state-change-of	Pathway Commons		VEGFA	FCGR3A	controls-state-change-of	Pathway Commons		RHOG	GAB2	controls-state-change-of	Pathway Commons		FGFR1	FCGR3A	controls-state-change-of	Pathway Commons
FN1	IGKV3-11	controls-state-change-of	Pathway Commons		MYO18A	GNG2	controls-state-change-of	Pathway Commons		MYD88	BTK	controls-state-change-of	Pathway Commons		SPTBN1	KRAS	controls-state-change-of	Pathway Commons		RHOG	TFG	controls-state-change-of	Pathway Commons		PIK3CD	FYN	controls-state-change-of	Pathway Commons		VEGFA	GNG7	controls-state-change-of	Pathway Commons		FN1	FGF2	controls-state-change-of	Pathway Commons
ICOS	IGHG3	controls-state-change-of	Pathway Commons		PIK3R5	IGHG1	controls-state-change-of	Pathway Commons		GAB3	INPP5D	catalysis-precedes	Pathway Commons		PIK3R1	GNB1	controls-state-change-of	Pathway Commons		AREG	LRRFIP1	controls-state-change-of	Pathway Commons		CD247	AKT3	controls-state-change-of	Pathway Commons		GNG11	IGHG3	controls-state-change-of	Pathway Commons		KLRC2	FGF9	controls-state-change-of	Pathway Commons
FCGR2A	CD3G	controls-state-change-of	Pathway Commons		TYROBP	LAT	controls-state-change-of	Pathway Commons		MET	LCK	controls-state-change-of	Pathway Commons		ICOS	GNB1	controls-state-change-of	Pathway Commons		HCK	LRRFIP1	controls-state-change-of	Pathway Commons		CPSF6	NCKAP1	controls-state-change-of	Pathway Commons		BDNF	IGLC2	controls-state-change-of	Pathway Commons		KITLG	FGF9	controls-state-change-of	Pathway Commons
AREG	IGHV2-5	controls-state-change-of	Pathway Commons		IGHV4-34	AKT2	controls-state-change-of	Pathway Commons		STAT3	GNB5	controls-state-change-of	Pathway Commons		MAPKAP1	PRR5	in-complex-with	Pathway Commons		RAPGEF1	KRAS	controls-state-change-of	Pathway Commons		TYROBP	CYFIP2	controls-state-change-of	Pathway Commons		PDGFRA	MDK	controls-state-change-of	Pathway Commons		PIP4K2B	SH2D2A	catalysis-precedes	Pathway Commons
IGHG2	ITK	controls-state-change-of	Pathway Commons		IGLV3-1	FGFR1	controls-state-change-of	Pathway Commons		IRS2	CD86	controls-state-change-of	Pathway Commons		CD3G	FYN	controls-state-change-of	Pathway Commons		CDC37	CD86	controls-state-change-of	Pathway Commons		CPSF6	BTK	controls-state-change-of	Pathway Commons		FGF1	GNG2	controls-state-change-of	Pathway Commons		PDGFA	INPP5D	catalysis-precedes	Pathway Commons
IL33	FCGR1A	controls-state-change-of	Pathway Commons		GNG8	IGLV3-25	controls-state-change-of	Pathway Commons		EGFR	GNB4	controls-state-change-of	Pathway Commons		PLCG2	SYK	controls-state-change-of	Pathway Commons		ZMYM2	FCGR3A	controls-state-change-of	Pathway Commons		PIK3R5	CD79A	controls-state-change-of	Pathway Commons		GNB4	ZMYM2	controls-state-change-of	Pathway Commons		KIT	FGFR2	controls-state-change-of	Pathway Commons
IL34	CD247	controls-state-change-of	Pathway Commons		IGKV3-20	MYO18A	controls-state-change-of	Pathway Commons		GNG12	BLNK	controls-state-change-of	Pathway Commons		CD247	ABI2	controls-state-change-of	Pathway Commons		PIK3AP1	TFG	controls-state-change-of	Pathway Commons		CAMK2G	KRAS	controls-state-change-of	Pathway Commons		SH2D2A	RAC1	controls-state-change-of	Pathway Commons		CD19	TEC	controls-state-change-of	Pathway Commons
TREM2	IGHV3-9	controls-state-change-of	Pathway Commons		PIK3C3	DAPP1	controls-state-change-of	Pathway Commons		JAK2	GNB2	controls-state-change-of	Pathway Commons		CLTC	TFG	controls-state-change-of	Pathway Commons		GNB2	CD86	controls-state-change-of	Pathway Commons		FN1	INPPL1	catalysis-precedes	Pathway Commons		VEGFA	FGF7	controls-state-change-of	Pathway Commons		FGF2	AKT2	controls-state-change-of	Pathway Commons
TRAT1	LAT	controls-state-change-of	Pathway Commons		IRS2	IGHV2-5	controls-state-change-of	Pathway Commons		STAT3	CYFIP1	controls-state-change-of	Pathway Commons		PIP4K2B	SH2D2A	catalysis-precedes	Pathway Commons		ANAPC15	CDC26	in-complex-with	Pathway Commons		B2M	PLCG1	controls-state-change-of	Pathway Commons		CBL	FGF1	controls-state-change-of	Pathway Commons		PIK3R3	TEC	controls-state-change-of	Pathway Commons
IGKV1D-39	FGFR4	controls-state-change-of	Pathway Commons		IGLV7-43	LCP2	controls-state-change-of	Pathway Commons		FGF20	KRAS	controls-state-change-of	Pathway Commons		PIP4K2A	IRAK4	catalysis-precedes	Pathway Commons		HCK	NPM1	controls-state-change-of	Pathway Commons		HSP90AA1	PTN	controls-state-change-of	Pathway Commons		PIK3CB	PDGFA	in-complex-with	Pathway Commons		PIP4K2B	AREG	catalysis-precedes	Pathway Commons
FGF1	GNG2	controls-state-change-of	Pathway Commons		AREG	FCGR2A	controls-state-change-of	Pathway Commons		IRAK1	LAT2	controls-state-change-of	Pathway Commons		FLT3	PDPK1	controls-state-change-of	Pathway Commons		MAPK1	NPM1	controls-state-change-of	Pathway Commons		JAK2	IGKC	controls-state-change-of	Pathway Commons		PIK3R5	FGF7	controls-state-change-of	Pathway Commons		FGF7	CD3G	controls-state-change-of	Pathway Commons
AXL	IGLV1-44	controls-state-change-of	Pathway Commons		TRAF6	IGLV3-19	controls-state-change-of	Pathway Commons		HLA-E	VAV2	controls-state-change-of	Pathway Commons		CNTRL	CD3G	controls-state-change-of	Pathway Commons		IRAK1	NPM1	controls-state-change-of	Pathway Commons		PIK3R1	GNB1	controls-state-change-of	Pathway Commons		PIK3R3	LCP2	controls-state-change-of	Pathway Commons		FCGR3A	FGF18	controls-state-change-of	Pathway Commons
LCK	IGLV3-19	controls-state-change-of	Pathway Commons		PIP4K2A	GNG11	catalysis-precedes	Pathway Commons		VEGFA	GNG4	controls-state-change-of	Pathway Commons		PIP4K2B	AREG	catalysis-precedes	Pathway Commons		IRS2	FGFR1OP2	controls-state-change-of	Pathway Commons		FGFR1	FCGR3A	controls-state-change-of	Pathway Commons		PDGFA	NCK1	controls-state-change-of	Pathway Commons		NTRK2	FGF7	controls-state-change-of	Pathway Commons
VEGFA	FGF7	controls-state-change-of	Pathway Commons		ICOS	FGFR1OP2	controls-state-change-of	Pathway Commons		AGO2	MOV10	in-complex-with	Pathway Commons		ZMYM2	INPP5K	catalysis-precedes	Pathway Commons		FGFR1OP2	WASF2	controls-state-change-of	Pathway Commons		FN1	FGF2	controls-state-change-of	Pathway Commons		GNB4	PLCG2	controls-state-change-of	Pathway Commons		EREG	GNG11	controls-state-change-of	Pathway Commons
KLRK1	IGHV3-9	controls-state-change-of	Pathway Commons		EML4	IGLV7-43	controls-state-change-of	Pathway Commons		HCK	FGFR3	controls-state-change-of	Pathway Commons		CDC37	CD28	controls-state-change-of	Pathway Commons		VEGFA	CPSF6	controls-state-change-of	Pathway Commons		MAPKAP1	PRR5	in-complex-with	Pathway Commons		HGF	IGHG2	controls-state-change-of	Pathway Commons		VEGFA	GNG2	controls-state-change-of	Pathway Commons
FYN	FGF7	controls-state-change-of	Pathway Commons		SHC1	AKT2	controls-state-change-of	Pathway Commons		IL34	GNG2	controls-state-change-of	Pathway Commons		PIP4K2A	AREG	catalysis-precedes	Pathway Commons		IRS2	NPM1	controls-state-change-of	Pathway Commons		CD3G	FYN	controls-state-change-of	Pathway Commons		PTN	DAPP1	controls-state-change-of	Pathway Commons		TRAF6	CD3G	controls-state-change-of	Pathway Commons
HGF	IGHG2	controls-state-change-of	Pathway Commons		GAB3	FGFR1	controls-state-change-of	Pathway Commons		IRS2	LCK	controls-state-change-of	Pathway Commons		TRAF6	CD3G	controls-state-change-of	Pathway Commons		IRS2	ZMYM2	controls-state-change-of	Pathway Commons		PLCG2	SYK	controls-state-change-of	Pathway Commons		CBL	GRAP2	controls-state-change-of	Pathway Commons		HGF	ITK	controls-state-change-of	Pathway Commons
KLRD1	IGHV3-33	controls-state-change-of	Pathway Commons		CD86	WASF2	controls-state-change-of	Pathway Commons		MYD88	GNG4	controls-state-change-of	Pathway Commons		PIK3CA	FLT3LG	in-complex-with	Pathway Commons		VEGFA	RHOA	controls-state-change-of	Pathway Commons		DCTN1	NCKAP1L	controls-state-change-of	Pathway Commons		ESR1	IGHG4	controls-state-change-of	Pathway Commons		FCGR3A	TEC	controls-state-change-of	Pathway Commons
IGHV3-48	GNG3	controls-state-change-of	Pathway Commons		GAB1	ALKAL2	controls-state-change-of	Pathway Commons		BCR	GNB5	controls-state-change-of	Pathway Commons		GRAP2	RAC1	controls-state-change-of	Pathway Commons		NPM1	GNG5	controls-state-change-of	Pathway Commons		PIP4K2A	IRAK4	catalysis-precedes	Pathway Commons		FGF7	BTK	controls-state-change-of	Pathway Commons		FCGR2A	FGF9	controls-state-change-of	Pathway Commons
GNG4	IGKV2-30	controls-state-change-of	Pathway Commons		GNG8	IGKV3-20	controls-state-change-of	Pathway Commons		MYD88	BLNK	controls-state-change-of	Pathway Commons		AREG	TFG	controls-state-change-of	Pathway Commons		IRAK1	GNG5	controls-state-change-of	Pathway Commons		FCGR1A	CD3G	controls-state-change-of	Pathway Commons		FLT3LG	PTN	controls-state-change-of	Pathway Commons		SOS1	FGF10	controls-state-change-of	Pathway Commons
PTN	IGKV2-28	controls-state-change-of	Pathway Commons		RHOG	IGKV1-5	controls-state-change-of	Pathway Commons		FGFR3	GNG12	controls-state-change-of	Pathway Commons		B2M	GNG2	controls-state-change-of	Pathway Commons		GNB1	LCP2	controls-state-change-of	Pathway Commons		FCGR1A	GNB1	controls-state-change-of	Pathway Commons		CNTRL	INPP5D	catalysis-precedes	Pathway Commons		PTN	BAIAP2	controls-state-change-of	Pathway Commons
IGHV3-30	FGF1	controls-state-change-of	Pathway Commons		IRAK4	GNG10	controls-state-change-of	Pathway Commons		LCK	FCGR1A	controls-state-change-of	Pathway Commons		FRS2	CNTRL	controls-state-change-of	Pathway Commons		CD86	SH3KBP1	controls-state-change-of	Pathway Commons		CBL	CD79B	controls-state-change-of	Pathway Commons		GNB3	VAV2	controls-state-change-of	Pathway Commons		FCGR3A	GNB5	controls-state-change-of	Pathway Commons
KLRC2	CD28	controls-state-change-of	Pathway Commons		IGLV3-1	FYN	controls-state-change-of	Pathway Commons		IL34	INPP5D	catalysis-precedes	Pathway Commons		FCGR3A	GNB5	controls-state-change-of	Pathway Commons		LYN	SH3KBP1	controls-state-change-of	Pathway Commons		PIP5K1A	MYD88	catalysis-precedes	Pathway Commons		JAK2	CD247	controls-state-change-of	Pathway Commons		PIP4K2B	KLRD1	catalysis-precedes	Pathway Commons
ESR1	IGHG4	controls-state-change-of	Pathway Commons		TYROBP	IGKV3-11	controls-state-change-of	Pathway Commons		CD86	LAT2	controls-state-change-of	Pathway Commons		SHC1	CD3G	controls-state-change-of	Pathway Commons		HBEGF	ZMYM2	controls-state-change-of	Pathway Commons		FGF2	AKT2	controls-state-change-of	Pathway Commons		FN1	NCKAP1L	controls-state-change-of	Pathway Commons		PDGFRA	LCK	controls-state-change-of	Pathway Commons
FGF7	BTK	controls-state-change-of	Pathway Commons		GRAP2	AKT2	controls-state-change-of	Pathway Commons		GNB2	FGF20	controls-state-change-of	Pathway Commons		PIP4K2B	KLRD1	catalysis-precedes	Pathway Commons		PIK3AP1	GRB2	controls-state-change-of	Pathway Commons		CNTRL	CD3G	controls-state-change-of	Pathway Commons		FCGR1A	IGHG3	controls-state-change-of	Pathway Commons		PDGFRA	GNG12	controls-state-change-of	Pathway Commons
GAB3	IGHV4-39	controls-state-change-of	Pathway Commons		TYROBP	CD28	controls-state-change-of	Pathway Commons		PDGFB	TRIM24	controls-state-change-of	Pathway Commons		HLA-E	NCK1	controls-state-change-of	Pathway Commons		EREG	CPSF6	controls-state-change-of	Pathway Commons		STRN	INPP5D	catalysis-precedes	Pathway Commons		PIK3CD	FGF20	controls-state-change-of	Pathway Commons		FN1	GNG11	controls-state-change-of	Pathway Commons
IGHV4-59	FGF1	controls-state-change-of	Pathway Commons		RAC2	IGHG2	controls-state-change-of	Pathway Commons		LYN	GNG2	controls-state-change-of	Pathway Commons		SUCLG2	ACAA2	catalysis-precedes	Pathway Commons		CDC37	BAIAP2	controls-state-change-of	Pathway Commons		VAV1	NCKAP1L	controls-state-change-of	Pathway Commons		GAB2	FCGR3A	controls-state-change-of	Pathway Commons		MET	ITK	controls-state-change-of	Pathway Commons
RAC2	IGLV1-40	controls-state-change-of	Pathway Commons		MOV10	AGO2	in-complex-with	Pathway Commons		PIP5K1B	HCK	catalysis-precedes	Pathway Commons		CLTC	GNG7	controls-state-change-of	Pathway Commons		GRB2	GNG5	controls-state-change-of	Pathway Commons		CD86	CYFIP2	controls-state-change-of	Pathway Commons		PIP4K2A	IGKC	catalysis-precedes	Pathway Commons		FLT3LG	MDK	controls-state-change-of	Pathway Commons
RAC2	IGHV4-34	controls-state-change-of	Pathway Commons		PIK3R5	CD79B	controls-state-change-of	Pathway Commons		PIK3AP1	FGFR3	controls-state-change-of	Pathway Commons		TRAT1	CNTRL	controls-state-change-of	Pathway Commons		ZMYM2	RAC1	controls-state-change-of	Pathway Commons		HLA-E	CD79A	controls-state-change-of	Pathway Commons		KLRD1	LCK	controls-state-change-of	Pathway Commons		EREG	GNG2	controls-state-change-of	Pathway Commons
IGHV4-39	ERLIN2	controls-state-change-of	Pathway Commons		SH2D2A	GNB4	controls-state-change-of	Pathway Commons		MET	BAIAP2	controls-state-change-of	Pathway Commons		CD28	INPP5K	catalysis-precedes	Pathway Commons		RAC1	CPSF6	controls-state-change-of	Pathway Commons		IRAK1	AKT2	controls-state-change-of	Pathway Commons		VEGFA	FCGR3A	controls-state-change-of	Pathway Commons		THOC5	FGF9	controls-state-change-of	Pathway Commons
GNG4	IGHG3	controls-state-change-of	Pathway Commons		PIK3C3	IGKV3-20	controls-state-change-of	Pathway Commons		BCR	FGF20	controls-state-change-of	Pathway Commons		MYD88	CYFIP2	controls-state-change-of	Pathway Commons		RAC2	ABI1	controls-state-change-of	Pathway Commons		IRAK1	SOS1	controls-state-change-of	Pathway Commons		IGHG1	RAC1	controls-state-change-of	Pathway Commons		PDGFRA	FGF7	controls-state-change-of	Pathway Commons
FCGR1A	IGHG3	controls-state-change-of	Pathway Commons		NTRK2	IGLV6-57	controls-state-change-of	Pathway Commons		MPST	PC	catalysis-precedes	Pathway Commons		IL1RAP	CD247	controls-state-change-of	Pathway Commons		STAT3	ZMYM2	controls-state-change-of	Pathway Commons		DVL2	FN1	catalysis-precedes	Pathway Commons		IRS2	FGFR1	controls-state-change-of	Pathway Commons		EGFR	FGF10	controls-state-change-of	Pathway Commons
EREG	IGLV1-44	controls-state-change-of	Pathway Commons		VAV1	GNB5	controls-state-change-of	Pathway Commons		PIK3R4	CD247	controls-state-change-of	Pathway Commons		PIP4K2B	B2M	catalysis-precedes	Pathway Commons		UBE2E1	CDC26	in-complex-with	Pathway Commons		PIK3CG	GAB2	controls-state-change-of	Pathway Commons		CD247	AKT3	controls-state-change-of	Pathway Commons		IRS2	PLCG1	controls-state-change-of	Pathway Commons
KLRD1	LCK	controls-state-change-of	Pathway Commons		STAT1	GNB5	controls-state-change-of	Pathway Commons		IRS2	PLCG2	controls-state-change-of	Pathway Commons		DCTN1	ATIC	controls-state-change-of	Pathway Commons		IRS2	LCP2	controls-state-change-of	Pathway Commons		FCGR1A	GNG7	controls-state-change-of	Pathway Commons		GRAP2	IGLC2	controls-state-change-of	Pathway Commons		MDK	CYFIP2	controls-state-change-of	Pathway Commons
VEGFA	FCGR3A	controls-state-change-of	Pathway Commons		IRS2	AKT2	controls-state-change-of	Pathway Commons		NTRK3	BTK	controls-state-change-of	Pathway Commons		PIP4K2A	PIK3AP1	catalysis-precedes	Pathway Commons		ANAPC11	ANAPC15	in-complex-with	Pathway Commons		PIK3AP1	FCGR2A	controls-state-change-of	Pathway Commons		MET	GNB4	controls-state-change-of	Pathway Commons		FGFR3	GNG11	controls-state-change-of	Pathway Commons
HGF	IGHV3-9	controls-state-change-of	Pathway Commons		IGKV1-5	PLCG2	controls-state-change-of	Pathway Commons		FGFR3	GNG4	controls-state-change-of	Pathway Commons		PIP4K2A	SYK	catalysis-precedes	Pathway Commons		STAT3	TFG	controls-state-change-of	Pathway Commons		LRRFIP1	AKT2	controls-state-change-of	Pathway Commons		FGF1	FCGR3A	controls-state-change-of	Pathway Commons		GNG11	CD28	controls-state-change-of	Pathway Commons
CD247	IGLV1-40	controls-state-change-of	Pathway Commons		CD19	CD79B	controls-state-change-of	Pathway Commons		HSP90AB1	HSPA1A	in-complex-with	Pathway Commons		EREG	GNG2	controls-state-change-of	Pathway Commons		PIP4K2A	RAC2	catalysis-precedes	Pathway Commons		TRIM24	PLCG1	controls-state-change-of	Pathway Commons		HGF	CD247	controls-state-change-of	Pathway Commons		PIK3CG	LCK	controls-state-change-of	Pathway Commons
IGKV1-39	LCK	controls-state-change-of	Pathway Commons		TRAT1	CD247	controls-state-change-of	Pathway Commons		FN1	LCK	controls-state-change-of	Pathway Commons		GNG7	ABI2	controls-state-change-of	Pathway Commons		CUX1	FCGR2A	controls-state-change-of	Pathway Commons		CD86	FGFR1OP2	controls-state-change-of	Pathway Commons		CD86	IGHG4	controls-state-change-of	Pathway Commons		KLRK1	LCK	controls-state-change-of	Pathway Commons
ICOS	GNG2	controls-state-change-of	Pathway Commons		VEGFA	CNTRL	controls-state-change-of	Pathway Commons		FGFR3	INPP5D	catalysis-precedes	Pathway Commons		SHC1	DAPP1	controls-state-change-of	Pathway Commons		CLTC	CPSF6	controls-state-change-of	Pathway Commons		PIK3R5	NCKAP1	controls-state-change-of	Pathway Commons		TYROBP	CYFIP2	controls-state-change-of	Pathway Commons		MDK	INPP5D	catalysis-precedes	Pathway Commons
FGFR4	TXK	controls-state-change-of	Pathway Commons		FGFR1OP2	IGLV3-25	controls-state-change-of	Pathway Commons		INPP5D	FCGR2A	controls-state-change-of	Pathway Commons		GNG2	DAPP1	controls-state-change-of	Pathway Commons		KIF5B	ZMYM2	controls-state-change-of	Pathway Commons		SHC1	CD3G	controls-state-change-of	Pathway Commons		GNG2	IGHG2	controls-state-change-of	Pathway Commons		NTRK2	FGF10	controls-state-change-of	Pathway Commons
IGHG3	IGLV1-51	controls-state-change-of	Pathway Commons		ICOS	GNB5	controls-state-change-of	Pathway Commons		EGF	LAT2	controls-state-change-of	Pathway Commons		RAC1	TRIM24	controls-state-change-of	Pathway Commons		CD86	ABI1	controls-state-change-of	Pathway Commons		LAT2	LRRFIP1	controls-state-change-of	Pathway Commons		CPSF6	BTK	controls-state-change-of	Pathway Commons		PDGFA	FGF18	controls-state-change-of	Pathway Commons
GRAP2	IGLC2	controls-state-change-of	Pathway Commons		TRAF6	ITK	controls-state-change-of	Pathway Commons		PIP5K1B	VEGFA	catalysis-precedes	Pathway Commons		MYD88	PDPK1	controls-state-change-of	Pathway Commons		FCGR2A	ZMYM2	controls-state-change-of	Pathway Commons		TYROBP	INPP5D	catalysis-precedes	Pathway Commons		IGKC	INPP5K	catalysis-precedes	Pathway Commons		SOS1	GNG11	controls-state-change-of	Pathway Commons
IGHV3-9	PTN	controls-state-change-of	Pathway Commons		GNG10	IGHV4-39	controls-state-change-of	Pathway Commons		LAT2	GNB4	controls-state-change-of	Pathway Commons		PIK3CG	LCK	controls-state-change-of	Pathway Commons		GNB2	FCGR3A	controls-state-change-of	Pathway Commons		FYN	BAG4	controls-state-change-of	Pathway Commons		GAB3	SHC1	controls-state-change-of	Pathway Commons		CD28	BAIAP2	controls-state-change-of	Pathway Commons
GNG2	IGHV1-69	controls-state-change-of	Pathway Commons		GRAP2	IGHV3-30	controls-state-change-of	Pathway Commons		HCK	CD86	controls-state-change-of	Pathway Commons		IRS2	GNG10	controls-state-change-of	Pathway Commons		PIK3AP1	NPM1	controls-state-change-of	Pathway Commons		TYROBP	PTEN	catalysis-precedes	Pathway Commons		DVL1	HBEGF	catalysis-precedes	Pathway Commons		CD19	CD28	controls-state-change-of	Pathway Commons
KLRD1	IGKV3-11	controls-state-change-of	Pathway Commons		FN1	IGKV3-11	controls-state-change-of	Pathway Commons		GNB5	CD86	controls-state-change-of	Pathway Commons		KLRK1	LCK	controls-state-change-of	Pathway Commons		MAPK1	RBX1	controls-state-change-of	Pathway Commons		BAG4	NCK1	controls-state-change-of	Pathway Commons		CBL	TXK	controls-state-change-of	Pathway Commons		CD28	FCGR2A	controls-state-change-of	Pathway Commons
FGF1	FCGR3A	controls-state-change-of	Pathway Commons		ICOS	IGHG3	controls-state-change-of	Pathway Commons		INPP5D	LCP2	controls-state-change-of	Pathway Commons		CLIP1	MAPK1	controls-phosphorylation-of	Pathway Commons		GNB1	CUX1	controls-state-change-of	Pathway Commons		STAT1	PTEN	catalysis-precedes	Pathway Commons		IGLC2	DAPP1	controls-state-change-of	Pathway Commons		SOS1	FGFR1	controls-state-change-of	Pathway Commons
HGF	CD247	controls-state-change-of	Pathway Commons		PIP4K2A	TRAF6	catalysis-precedes	Pathway Commons		CD247	FGF2	controls-state-change-of	Pathway Commons		PIP4K2B	SYK	catalysis-precedes	Pathway Commons		GNG5	CUX1	controls-state-change-of	Pathway Commons		BAG4	DAPP1	controls-state-change-of	Pathway Commons		PIK3AP1	GNB3	controls-state-change-of	Pathway Commons		GNG12	FGFR1	controls-state-change-of	Pathway Commons
CD86	IGHG4	controls-state-change-of	Pathway Commons		FCGR2A	CD3G	controls-state-change-of	Pathway Commons		HBEGF	LCP2	controls-state-change-of	Pathway Commons		TRAT1	VAV3	controls-state-change-of	Pathway Commons		IL1RAP	CPSF6	controls-state-change-of	Pathway Commons		HLA-E	NCK1	controls-state-change-of	Pathway Commons		GRAP2	IGHG4	controls-state-change-of	Pathway Commons		INPP5D	TXK	controls-state-change-of	Pathway Commons
GNG2	IGHG2	controls-state-change-of	Pathway Commons		AREG	IGHV2-5	controls-state-change-of	Pathway Commons		TRIM24	GNG2	controls-state-change-of	Pathway Commons		TRAF6	DAPP1	controls-state-change-of	Pathway Commons		STAT3	LAT2	controls-state-change-of	Pathway Commons		SUCLG2	ACAA2	catalysis-precedes	Pathway Commons		SHC1	CD28	controls-state-change-of	Pathway Commons		MET	LCK	controls-state-change-of	Pathway Commons
IGHG3	IGKV4-1	controls-state-change-of	Pathway Commons		IGHG2	ITK	controls-state-change-of	Pathway Commons		PIP5K1B	HLA-E	catalysis-precedes	Pathway Commons		PIP4K2B	KLRK1	catalysis-precedes	Pathway Commons		VEGFA	CUX1	controls-state-change-of	Pathway Commons		FGFR1OP2	CD247	controls-state-change-of	Pathway Commons		HBEGF	IGHG1	controls-state-change-of	Pathway Commons		PIK3CG	FGF10	controls-state-change-of	Pathway Commons
IL34	IGKV1-33	controls-state-change-of	Pathway Commons		TREM2	DAPP1	controls-state-change-of	Pathway Commons		IL34	LCP2	controls-state-change-of	Pathway Commons		KLRK1	PLCG2	controls-state-change-of	Pathway Commons		HLA-E	GNB1	controls-state-change-of	Pathway Commons		HSP90AA1	AKT3	controls-state-change-of	Pathway Commons		HSP90AA1	PTN	controls-state-change-of	Pathway Commons		PDGFRA	TXK	controls-state-change-of	Pathway Commons
GAB3	IGHV3-23	controls-state-change-of	Pathway Commons		MYO18A	IGLV1-40	controls-state-change-of	Pathway Commons		JAK2	CYFIP1	controls-state-change-of	Pathway Commons		PIK3AP1	RAC1	controls-state-change-of	Pathway Commons		NPM1	ZMYM2	controls-state-change-of	Pathway Commons		MYD88	CYFIP2	controls-state-change-of	Pathway Commons		JAK2	IGKC	controls-state-change-of	Pathway Commons		KLRK1	PTN	controls-state-change-of	Pathway Commons
CD80	IGLV6-57	controls-state-change-of	Pathway Commons		MYO18A	IGLV3-19	controls-state-change-of	Pathway Commons		ERBB2	GNG12	controls-state-change-of	Pathway Commons		CNTRL	LCK	controls-state-change-of	Pathway Commons		RAC1	NPM1	controls-state-change-of	Pathway Commons		LAT2	SYK	controls-state-change-of	Pathway Commons		PDGFB	IGLC2	controls-state-change-of	Pathway Commons		PIP4K2B	KLRK1	catalysis-precedes	Pathway Commons
ICOS	IGLC2	controls-state-change-of	Pathway Commons		IL33	FCGR1A	controls-state-change-of	Pathway Commons		NTRK2	GNB5	controls-state-change-of	Pathway Commons		FLT3LG	TRIM24	controls-state-change-of	Pathway Commons		FCGR2A	CUX1	controls-state-change-of	Pathway Commons		PTPRA	KRAS	controls-state-change-of	Pathway Commons		RAC2	GRB2	controls-state-change-of	Pathway Commons		IRAK4	GNG11	controls-state-change-of	Pathway Commons
AREG	ITK	controls-state-change-of	Pathway Commons		IRS2	IGHG3	controls-state-change-of	Pathway Commons		FGF20	LAT2	controls-state-change-of	Pathway Commons		IL1RAP	FYN	controls-state-change-of	Pathway Commons		FCGR3A	TFG	controls-state-change-of	Pathway Commons		DCTN1	ATIC	controls-state-change-of	Pathway Commons		IGHG3	TEC	controls-state-change-of	Pathway Commons		TRAT1	CD79B	controls-state-change-of	Pathway Commons
MYD88	IGHV3-30	controls-state-change-of	Pathway Commons		TRAF6	KLB	controls-state-change-of	Pathway Commons		PIK3AP1	GNB5	controls-state-change-of	Pathway Commons		IRAK4	CD28	controls-state-change-of	Pathway Commons		FCGR3A	NCKAP1L	controls-state-change-of	Pathway Commons		CNTRL	IGHD	controls-state-change-of	Pathway Commons		PDGFRB	BTK	controls-state-change-of	Pathway Commons		PIK3R1	FGF10	controls-state-change-of	Pathway Commons
GRAP2	IGHG4	controls-state-change-of	Pathway Commons		VEGFA	GNG7	controls-state-change-of	Pathway Commons		IL34	BTK	controls-state-change-of	Pathway Commons		CLTC	ABI2	controls-state-change-of	Pathway Commons		ZMYM2	SH3KBP1	controls-state-change-of	Pathway Commons		TREM2	GAB2	controls-state-change-of	Pathway Commons		FGFR1	FCGR3A	controls-state-change-of	Pathway Commons		FGFR2	BAIAP2	controls-state-change-of	Pathway Commons
GNG4	PLCG2	controls-state-change-of	Pathway Commons		EREG	IGHD	controls-state-change-of	Pathway Commons		RAPGEF1	KRAS	controls-state-change-of	Pathway Commons		SOS1	VAV3	controls-state-change-of	Pathway Commons		IRS2	WASF2	controls-state-change-of	Pathway Commons		FLT3LG	MDK	controls-state-change-of	Pathway Commons		PIK3R5	FGF20	controls-state-change-of	Pathway Commons		CD19	FGF9	controls-state-change-of	Pathway Commons
FGF7	IGKV2-28	controls-state-change-of	Pathway Commons		GNG11	IGHG3	controls-state-change-of	Pathway Commons		CD86	PLCG2	controls-state-change-of	Pathway Commons		PIK3CD	ERLIN2	controls-state-change-of	Pathway Commons		GNG5	LAT2	controls-state-change-of	Pathway Commons		PIP4K2A	PIK3AP1	catalysis-precedes	Pathway Commons		PDGFA	ABI1	controls-state-change-of	Pathway Commons		CD3G	FGFR4	controls-state-change-of	Pathway Commons
FCGR2A	IGLV2-8	controls-state-change-of	Pathway Commons		TRAT1	LAT	controls-state-change-of	Pathway Commons		GNG12	BTK	controls-state-change-of	Pathway Commons		JAK2	DAPP1	controls-state-change-of	Pathway Commons		EML4	GRB2	controls-state-change-of	Pathway Commons		CPSF6	SH3KBP1	controls-state-change-of	Pathway Commons		GNB3	FCGR2A	controls-state-change-of	Pathway Commons		IRAK4	CD28	controls-state-change-of	Pathway Commons
PDGFRB	BTK	controls-state-change-of	Pathway Commons		IRAK4	IGHG4	controls-state-change-of	Pathway Commons		PDGFB	VAV3	controls-state-change-of	Pathway Commons		IRAK4	CD247	controls-state-change-of	Pathway Commons		CDC37	RHOA	controls-state-change-of	Pathway Commons		RANBP9	NRAS	controls-state-change-of	Pathway Commons		PLCG2	SYK	controls-state-change-of	Pathway Commons		PTN	LCK	controls-state-change-of	Pathway Commons
PIK3R6	IGKV3-11	controls-state-change-of	Pathway Commons		LCK	IGLV3-19	controls-state-change-of	Pathway Commons		PIK3AP1	PLCG2	controls-state-change-of	Pathway Commons		EREG	CYFIP2	controls-state-change-of	Pathway Commons		CDC37	CUX1	controls-state-change-of	Pathway Commons		PIP4K2A	SYK	catalysis-precedes	Pathway Commons		TYROBP	FGF1	controls-state-change-of	Pathway Commons		IRAK4	CD247	controls-state-change-of	Pathway Commons
FGFR1	FCGR3A	controls-state-change-of	Pathway Commons		SH2D2A	CD79A	controls-state-change-of	Pathway Commons		STAT1	CD247	controls-state-change-of	Pathway Commons		HCK	LAT	controls-state-change-of	Pathway Commons		IL1RAP	BAIAP2	controls-state-change-of	Pathway Commons		IL33	NCKAP1L	controls-state-change-of	Pathway Commons		TRAF6	CD86	controls-state-change-of	Pathway Commons		FGFR2	INPP5D	catalysis-precedes	Pathway Commons
IGKV1-39	TXK	controls-state-change-of	Pathway Commons		SH2D2A	IGLV2-11	controls-state-change-of	Pathway Commons		GNB2	CD86	controls-state-change-of	Pathway Commons		AGO3	TNRC6C	in-complex-with	Pathway Commons		CDC37	RAC1	controls-state-change-of	Pathway Commons		MDK	PTEN	catalysis-precedes	Pathway Commons		GNG11	NCK1	controls-state-change-of	Pathway Commons		CD19	GNG11	controls-state-change-of	Pathway Commons
IGHG2	IGHV2-5	controls-state-change-of	Pathway Commons		PIK3AP1	IGLV3-25	controls-state-change-of	Pathway Commons		ANAPC15	CDC26	in-complex-with	Pathway Commons		HLA-E	CD3G	controls-state-change-of	Pathway Commons		GNB1	ZMYM2	controls-state-change-of	Pathway Commons		MDK	CYFIP2	controls-state-change-of	Pathway Commons		PDGFA	INPP5D	catalysis-precedes	Pathway Commons		EREG	CYFIP2	controls-state-change-of	Pathway Commons
IGLV3-25	FGF7	controls-state-change-of	Pathway Commons		IRS2	IGLV2-14	controls-state-change-of	Pathway Commons		NTRK3	LCK	controls-state-change-of	Pathway Commons		PLCG2	GNG7	controls-state-change-of	Pathway Commons		ZMYM2	RHOA	controls-state-change-of	Pathway Commons		SHC1	DAPP1	controls-state-change-of	Pathway Commons		DVL1	PTN	catalysis-precedes	Pathway Commons		HCK	LAT	controls-state-change-of	Pathway Commons
IGKV1D-39	GNG2	controls-state-change-of	Pathway Commons		GNG7	IGLV2-8	controls-state-change-of	Pathway Commons		MET	BTK	controls-state-change-of	Pathway Commons		IRS2	LCK	controls-state-change-of	Pathway Commons		HSPA1A	HSP90AB1	in-complex-with	Pathway Commons		CBL	IGKC	controls-state-change-of	Pathway Commons		FCGR1A	CD3G	controls-state-change-of	Pathway Commons		AXL	INPP5J	catalysis-precedes	Pathway Commons
FGF1	IGLC1	controls-state-change-of	Pathway Commons		GNG11	IGHV3-7	controls-state-change-of	Pathway Commons		STAT3	BTK	controls-state-change-of	Pathway Commons		SH2D2A	ABI2	controls-state-change-of	Pathway Commons		B2M	GNB1	controls-state-change-of	Pathway Commons		EML4	PTEN	catalysis-precedes	Pathway Commons		CBL	CD79B	controls-state-change-of	Pathway Commons		HCK	FGFR3	controls-state-change-of	Pathway Commons
CD3G	FYN	controls-state-change-of	Pathway Commons		MDK	IGLV3-21	controls-state-change-of	Pathway Commons		SUCLG1	ACSS3	catalysis-precedes	Pathway Commons		TYROBP	INPP5K	catalysis-precedes	Pathway Commons		LYN	GNG5	controls-state-change-of	Pathway Commons		GNG7	CPSF6	controls-state-change-of	Pathway Commons		IGLC2	VAV2	controls-state-change-of	Pathway Commons		TGFA	FGF10	controls-state-change-of	Pathway Commons
IGKV3-15	LCP2	controls-state-change-of	Pathway Commons		GNB4	PLCG2	controls-state-change-of	Pathway Commons		LCK	VAV3	controls-state-change-of	Pathway Commons		CDC37	LAT	controls-state-change-of	Pathway Commons		RAC2	SH3KBP1	controls-state-change-of	Pathway Commons		MYD88	INPP5D	catalysis-precedes	Pathway Commons		CNTRL	CD3G	controls-state-change-of	Pathway Commons		FGFR3	CD79A	controls-state-change-of	Pathway Commons
FCGR2A	IGHV2-5	controls-state-change-of	Pathway Commons		KLRD1	IGHV3-33	controls-state-change-of	Pathway Commons		HBEGF	BLNK	controls-state-change-of	Pathway Commons		GRAP2	SHC1	controls-state-change-of	Pathway Commons		RHOG	NCKAP1L	controls-state-change-of	Pathway Commons		PIK3CG	LCK	controls-state-change-of	Pathway Commons		PIK3R3	TEC	controls-state-change-of	Pathway Commons		SOS1	EGFR	in-complex-with	Pathway Commons
TYROBP	FGF1	controls-state-change-of	Pathway Commons		PDGFA	IGKV3-11	controls-state-change-of	Pathway Commons		CSF1R	TRIM24	controls-state-change-of	Pathway Commons		PIP4K2B	TRAF6	catalysis-precedes	Pathway Commons		RHOG	CD86	controls-state-change-of	Pathway Commons		GNG7	FGF2	controls-state-change-of	Pathway Commons		ZMYM2	INPP5K	catalysis-precedes	Pathway Commons		IRS2	LCK	controls-state-change-of	Pathway Commons
IL34	IGHV3-7	controls-state-change-of	Pathway Commons		MYO18A	IGKV1-12	controls-state-change-of	Pathway Commons		HLA-E	GNB5	controls-state-change-of	Pathway Commons		DCTN1	LCK	controls-state-change-of	Pathway Commons		IL1RAP	RAC1	controls-state-change-of	Pathway Commons		KLRK1	LCK	controls-state-change-of	Pathway Commons		STRN	INPP5D	catalysis-precedes	Pathway Commons		PDGFRA	BAIAP2	controls-state-change-of	Pathway Commons
IGLV1-40	VAV1	controls-state-change-of	Pathway Commons		PIK3CG	IGLV3-21	controls-state-change-of	Pathway Commons		IRAK1	GNB5	controls-state-change-of	Pathway Commons		ACAA2	DLD	catalysis-precedes	Pathway Commons		LYN	CUX1	controls-state-change-of	Pathway Commons		MDK	INPP5D	catalysis-precedes	Pathway Commons		VAV1	NCKAP1L	controls-state-change-of	Pathway Commons		PDGFRB	FGF9	controls-state-change-of	Pathway Commons
IGHG2	IGKV4-1	controls-state-change-of	Pathway Commons		IGLV2-11	CYFIP2	controls-state-change-of	Pathway Commons		BCR	GNB2	controls-state-change-of	Pathway Commons		ICOS	SHC1	controls-state-change-of	Pathway Commons		CSF1R	SH3KBP1	controls-state-change-of	Pathway Commons		AXL	NCK1	controls-state-change-of	Pathway Commons		CD86	CYFIP2	controls-state-change-of	Pathway Commons		KITLG	MYO18A	controls-state-change-of	Pathway Commons
FCGR1A	CD3G	controls-state-change-of	Pathway Commons		IGLC3	MDK	controls-state-change-of	Pathway Commons		PLCG2	TRIM24	controls-state-change-of	Pathway Commons		KLRK1	CD28	controls-state-change-of	Pathway Commons		RBX1	NPM1	in-complex-with	Pathway Commons		CD86	FCGR2A	controls-state-change-of	Pathway Commons		FGF7	CD3G	controls-state-change-of	Pathway Commons		KLRD1	FGF2	controls-state-change-of	Pathway Commons
IGHV3-9	VAV1	controls-state-change-of	Pathway Commons		ALKAL2	LAT	controls-state-change-of	Pathway Commons		AXL	CD247	controls-state-change-of	Pathway Commons		RAC2	TFG	controls-state-change-of	Pathway Commons		RAC2	FCGR3A	controls-state-change-of	Pathway Commons		CNTRL	FCGR1A	controls-state-change-of	Pathway Commons		PIK3R3	ESR1	in-complex-with	Pathway Commons		PDGFRB	FCGR2A	controls-state-change-of	Pathway Commons
IGKV4-1	FYN	controls-state-change-of	Pathway Commons		PIK3C3	IGLV1-40	controls-state-change-of	Pathway Commons		PIK3R4	INPP5D	catalysis-precedes	Pathway Commons		KLRD1	SOS1	controls-state-change-of	Pathway Commons		STAT1	FCGR2A	controls-state-change-of	Pathway Commons		STRN	LAT2	controls-state-change-of	Pathway Commons		PIP4K2A	AREG	catalysis-precedes	Pathway Commons		PIP4K2B	TRAF6	catalysis-precedes	Pathway Commons
TREM2	IGLV3-19	controls-state-change-of	Pathway Commons		GAB3	IGHV4-39	controls-state-change-of	Pathway Commons		HSP90AA1	GNG4	controls-state-change-of	Pathway Commons		SH2D2A	GNG2	controls-state-change-of	Pathway Commons		PIP4K2A	HCK	catalysis-precedes	Pathway Commons		CLIP1	MAPK1	controls-phosphorylation-of	Pathway Commons		GNGT2	RAC1	controls-state-change-of	Pathway Commons		CD19	FCGR2A	controls-state-change-of	Pathway Commons
CSF1R	IGLC3	controls-state-change-of	Pathway Commons		IGLV1-40	GNG8	controls-state-change-of	Pathway Commons		TREM2	BRK1	controls-state-change-of	Pathway Commons		CD3G	PLCG2	controls-state-change-of	Pathway Commons		IRAK1	TFG	controls-state-change-of	Pathway Commons		SOS1	FGFR1	controls-state-change-of	Pathway Commons		VEGFA	GNG2	controls-state-change-of	Pathway Commons		FGFR3	GNG12	controls-state-change-of	Pathway Commons
IGHG2	IGKV2-29	controls-state-change-of	Pathway Commons		JAK2	IGLC3	controls-state-change-of	Pathway Commons		HBEGF	GNB5	controls-state-change-of	Pathway Commons		GNG10	AKT3	controls-state-change-of	Pathway Commons		NPM1	RAC1	controls-state-change-of	Pathway Commons		CNTRL	FCGR2A	controls-state-change-of	Pathway Commons		GNG10	CYFIP1	controls-state-change-of	Pathway Commons		KLRC2	GNB5	controls-state-change-of	Pathway Commons
IL33	IGHV1-2	controls-state-change-of	Pathway Commons		PIK3R5	IGKV1-12	controls-state-change-of	Pathway Commons		GNB5	BCR	controls-state-change-of	Pathway Commons		FLT3	LCK	controls-state-change-of	Pathway Commons		VEGFA	WASF2	controls-state-change-of	Pathway Commons		SUCLG1	ACAA2	catalysis-precedes	Pathway Commons		TRAF6	CD3G	controls-state-change-of	Pathway Commons		KLRK1	CD28	controls-state-change-of	Pathway Commons
IGLV1-51	FGF1	controls-state-change-of	Pathway Commons		RAC2	IGLV1-40	controls-state-change-of	Pathway Commons		IRAK1	TRIM24	controls-state-change-of	Pathway Commons		PIP4K2B	CNTRL	catalysis-precedes	Pathway Commons		CLTC	CD86	controls-state-change-of	Pathway Commons		MYD88	BTK	controls-state-change-of	Pathway Commons		TYROBP	IGHG3	controls-state-change-of	Pathway Commons		MDK	GNG2	controls-state-change-of	Pathway Commons
IGHV4-39	PLCG2	controls-state-change-of	Pathway Commons		SH2D2A	IGLV3-19	controls-state-change-of	Pathway Commons		AXL	PLCG2	controls-state-change-of	Pathway Commons		DCTN1	ABI2	controls-state-change-of	Pathway Commons		RHOG	CUX1	controls-state-change-of	Pathway Commons		DVL2	MYD88	catalysis-precedes	Pathway Commons		FCGR1A	GNG2	controls-state-change-of	Pathway Commons		KLRC2	AKT2	controls-state-change-of	Pathway Commons
EREG	IGHV2-5	controls-state-change-of	Pathway Commons		PDGFA	KLB	controls-state-change-of	Pathway Commons		SYK	GNB5	controls-state-change-of	Pathway Commons		HLA-E	GRAP2	controls-state-change-of	Pathway Commons		HLA-E	BAIAP2	controls-state-change-of	Pathway Commons		INPPL1	DAPP1	controls-state-change-of	Pathway Commons		STRN	FGF1	controls-state-change-of	Pathway Commons		UBE2S	ANAPC4	in-complex-with	Pathway Commons
FGF7	CD3G	controls-state-change-of	Pathway Commons		CNTRL	INPP5D	catalysis-precedes	Pathway Commons		PLCG2	BAIAP2	controls-state-change-of	Pathway Commons		PIP4K2B	ZMYM2	catalysis-precedes	Pathway Commons		LYN	NPM1	controls-state-change-of	Pathway Commons		KLRK1	PTN	controls-state-change-of	Pathway Commons		FCGR3A	TEC	controls-state-change-of	Pathway Commons		THOC5	FGFR4	controls-state-change-of	Pathway Commons
IGHV1-69	LAT	controls-state-change-of	Pathway Commons		RAC2	IGHV4-34	controls-state-change-of	Pathway Commons		NTRK3	BRK1	controls-state-change-of	Pathway Commons		STAT1	CD28	controls-state-change-of	Pathway Commons		ZMYM2	NPM1	controls-state-change-of	Pathway Commons		KLRK1	PLCG2	controls-state-change-of	Pathway Commons		IGLC2	GAB2	controls-state-change-of	Pathway Commons		PIK3R1	FGF2	controls-state-change-of	Pathway Commons
AXL	IGLV1-40	controls-state-change-of	Pathway Commons		KIT	AKT3	controls-state-change-of	Pathway Commons		GNG12	CD86	controls-state-change-of	Pathway Commons		SOS1	CD3G	controls-state-change-of	Pathway Commons		GNB2	SH3KBP1	controls-state-change-of	Pathway Commons		SYK	MYO18A	controls-state-change-of	Pathway Commons		GRAP2	RAC1	controls-state-change-of	Pathway Commons		KLRD1	SOS1	controls-state-change-of	Pathway Commons
IGHV3-7	GNG3	controls-state-change-of	Pathway Commons		JAK2	CD247	controls-state-change-of	Pathway Commons		CD247	BAIAP2	controls-state-change-of	Pathway Commons		CD247	GNB1	controls-state-change-of	Pathway Commons		RAC2	NCKAP1L	controls-state-change-of	Pathway Commons		GAB2	PTN	controls-state-change-of	Pathway Commons		GNB3	IGLC2	controls-state-change-of	Pathway Commons		SH2D2A	GNG2	controls-state-change-of	Pathway Commons
VEGFA	GNG2	controls-state-change-of	Pathway Commons		EPOR	IGLV7-43	controls-state-change-of	Pathway Commons		CSF1	BCR	controls-state-change-of	Pathway Commons		GAB3	TFG	controls-state-change-of	Pathway Commons		IRAK1	RHOA	controls-state-change-of	Pathway Commons		CNTRL	LCK	controls-state-change-of	Pathway Commons		FCGR1A	FGF20	controls-state-change-of	Pathway Commons		FGF9	GNG11	controls-state-change-of	Pathway Commons
IGLV3-19	LAT	controls-state-change-of	Pathway Commons		PIK3AP1	IGHM	controls-state-change-of	Pathway Commons		GNG2	CD86	controls-state-change-of	Pathway Commons		PIK3R4	CD247	controls-state-change-of	Pathway Commons		FGFR1OP2	BAIAP2	controls-state-change-of	Pathway Commons		PIK3CB	GAB2	controls-state-change-of	Pathway Commons		HGF	DAPP1	controls-state-change-of	Pathway Commons		IL33	CD79B	controls-state-change-of	Pathway Commons
CD86	IGHV3-9	controls-state-change-of	Pathway Commons		IGLV2-14	WASF2	controls-state-change-of	Pathway Commons		IRS2	LCP2	controls-state-change-of	Pathway Commons		PIK3R3	FCGR3A	controls-state-change-of	Pathway Commons		PIP4K2A	CDC37	catalysis-precedes	Pathway Commons		GAB2	CD79B	controls-state-change-of	Pathway Commons		PIK3CG	GAB2	controls-state-change-of	Pathway Commons		IL33	CD247	controls-state-change-of	Pathway Commons
IGHG3	IGLV6-57	controls-state-change-of	Pathway Commons		FN1	NCKAP1L	controls-state-change-of	Pathway Commons		IL34	BAIAP2	controls-state-change-of	Pathway Commons		GNG7	RAC1	controls-state-change-of	Pathway Commons		CD86	TFG	controls-state-change-of	Pathway Commons		PIP4K2A	FGFR1	catalysis-precedes	Pathway Commons		GAB2	VAV3	controls-state-change-of	Pathway Commons		FGFR3	CYFIP2	controls-state-change-of	Pathway Commons
GRAP2	IGHV2-5	controls-state-change-of	Pathway Commons		FCGR1A	IGHG3	controls-state-change-of	Pathway Commons		INPP5D	VAV2	controls-state-change-of	Pathway Commons		IRS2	PLCG2	controls-state-change-of	Pathway Commons		IL1RAP	LAT2	controls-state-change-of	Pathway Commons		MDK	NCK1	controls-state-change-of	Pathway Commons		FCGR1A	GNG7	controls-state-change-of	Pathway Commons		BTC	FCGR2A	controls-state-change-of	Pathway Commons
HGF	ITK	controls-state-change-of	Pathway Commons		ALKAL2	FGFR1OP2	controls-state-change-of	Pathway Commons		GNB5	BRK1	controls-state-change-of	Pathway Commons		AGO4	MOV10	in-complex-with	Pathway Commons		RAC1	LCP2	controls-state-change-of	Pathway Commons		FLT3LG	TRIM24	controls-state-change-of	Pathway Commons		DVL1	VAV1	catalysis-precedes	Pathway Commons		EREG	HRAS	controls-state-change-of	Pathway Commons
IGKV2-30	ERLIN2	controls-state-change-of	Pathway Commons		PIP4K2A	IGKC	catalysis-precedes	Pathway Commons		EGF	LCP2	controls-state-change-of	Pathway Commons		TYROBP	SOS1	controls-state-change-of	Pathway Commons		CD86	CUX1	controls-state-change-of	Pathway Commons		PIK3CB	PTEN	catalysis-precedes	Pathway Commons		LCK	IGHG2	controls-state-change-of	Pathway Commons		MET	BAIAP2	controls-state-change-of	Pathway Commons
IGHG3	IGHV4-34	controls-state-change-of	Pathway Commons		KLRD1	LCK	controls-state-change-of	Pathway Commons		EGF	FGF20	controls-state-change-of	Pathway Commons		CD247	AKT2	controls-state-change-of	Pathway Commons		UBE2D1	CDC26	in-complex-with	Pathway Commons		IRAK1	LAT2	controls-state-change-of	Pathway Commons		PIK3AP1	FCGR2A	controls-state-change-of	Pathway Commons		MPST	PC	catalysis-precedes	Pathway Commons
TYROBP	IGHG3	controls-state-change-of	Pathway Commons		KLB	MYO18A	controls-state-change-of	Pathway Commons		SPTAN1	CDC5L	interacts-with	APPIC		SOS1	ABI2	controls-state-change-of	Pathway Commons		KIF5B	TFG	controls-state-change-of	Pathway Commons		PTN	LCK	controls-state-change-of	Pathway Commons		GRB2	GNB5	controls-state-change-of	Pathway Commons		SOS1	CD3G	controls-state-change-of	Pathway Commons
IGKV1-33	FGF7	controls-state-change-of	Pathway Commons		VEGFA	FCGR3A	controls-state-change-of	Pathway Commons		ERBB2	GNB2	controls-state-change-of	Pathway Commons		PIK3R1	GNG7	controls-state-change-of	Pathway Commons		CUX1	CD86	controls-state-change-of	Pathway Commons		JAK2	DAPP1	controls-state-change-of	Pathway Commons		B2M	GNG2	controls-state-change-of	Pathway Commons		CD19	PLCG1	controls-state-change-of	Pathway Commons
FCGR1A	GNG2	controls-state-change-of	Pathway Commons		IGKV1-12	BTK	controls-state-change-of	Pathway Commons		PIP5K1B	FGFR3	catalysis-precedes	Pathway Commons		JAK2	TXK	controls-state-change-of	Pathway Commons		RHOG	GNG5	controls-state-change-of	Pathway Commons		IRAK4	CD247	controls-state-change-of	Pathway Commons		GAB2	IGHG1	controls-state-change-of	Pathway Commons		PIK3R1	INPP5J	catalysis-precedes	Pathway Commons
PIK3R6	IGHV3-9	controls-state-change-of	Pathway Commons		IGHG4	ALKAL2	controls-state-change-of	Pathway Commons		CD247	GNG2	controls-state-change-of	Pathway Commons		RAC2	ABI2	controls-state-change-of	Pathway Commons		RAC2	LRRFIP1	controls-state-change-of	Pathway Commons		PIK3CB	FCGR3A	controls-state-change-of	Pathway Commons		FCGR3A	GNB5	controls-state-change-of	Pathway Commons		KDR	FGFR4	controls-state-change-of	Pathway Commons
GNG2	IGLC7	controls-state-change-of	Pathway Commons		PIK3CD	FYN	controls-state-change-of	Pathway Commons		SKP1	FBXW7	in-complex-with	Pathway Commons		ACLY	AK3	catalysis-precedes	Pathway Commons		MYD88	BRK1	controls-state-change-of	Pathway Commons		CPSF6	IGHD	controls-state-change-of	Pathway Commons		SHC1	CD3G	controls-state-change-of	Pathway Commons		HBEGF	CYFIP2	controls-state-change-of	Pathway Commons
FGFR1	IGHV3-33	controls-state-change-of	Pathway Commons		IGKV1-12	INPP5K	catalysis-precedes	Pathway Commons		STAT3	LAT2	controls-state-change-of	Pathway Commons		AREG	INPP5K	catalysis-precedes	Pathway Commons		GRB2	ABI1	controls-state-change-of	Pathway Commons		AGO2	MOV10	in-complex-with	Pathway Commons		IGLC2	CYFIP1	controls-state-change-of	Pathway Commons		PIK3R3	KITLG	in-complex-with	Pathway Commons
IGLV2-8	PTN	controls-state-change-of	Pathway Commons		CD247	IGLV1-40	controls-state-change-of	Pathway Commons		ERBB2	BTK	controls-state-change-of	Pathway Commons		IRAK4	SH3KBP1	controls-state-change-of	Pathway Commons		B2M	NCKAP1L	controls-state-change-of	Pathway Commons		EREG	CYFIP2	controls-state-change-of	Pathway Commons		TYROBP	INPP5D	catalysis-precedes	Pathway Commons		PIK3R3	FCGR3A	controls-state-change-of	Pathway Commons
IGKV3-20	FGFR1	controls-state-change-of	Pathway Commons		IGKV1-39	LCK	controls-state-change-of	Pathway Commons		EGF	CYFIP1	controls-state-change-of	Pathway Commons		CBL	ABI2	controls-state-change-of	Pathway Commons		AREG	BAIAP2	controls-state-change-of	Pathway Commons		HCK	LAT	controls-state-change-of	Pathway Commons		CNTRL	IGHG4	controls-state-change-of	Pathway Commons		FN1	PTN	controls-state-change-of	Pathway Commons
EPOR	IGHV3-33	controls-state-change-of	Pathway Commons		ICOS	GNG2	controls-state-change-of	Pathway Commons		GNB5	SYK	controls-state-change-of	Pathway Commons		GNB1	DAPP1	controls-state-change-of	Pathway Commons		SUCLG1	SDHB	catalysis-precedes	Pathway Commons		CPSF6	DAPP1	controls-state-change-of	Pathway Commons		PIK3R3	GNGT2	controls-state-change-of	Pathway Commons		INPP5D	CYFIP2	controls-state-change-of	Pathway Commons
LCK	IGHG2	controls-state-change-of	Pathway Commons		IGHG3	IGLV1-51	controls-state-change-of	Pathway Commons		AXL	VAV3	controls-state-change-of	Pathway Commons		PIK3R3	VAV3	controls-state-change-of	Pathway Commons		TYROBP	FGFR1OP2	controls-state-change-of	Pathway Commons		PIK3CG	LRRFIP1	controls-state-change-of	Pathway Commons		HLA-E	NCK1	controls-state-change-of	Pathway Commons		IRS1	FGF10	controls-state-change-of	Pathway Commons
TYROBP	IGHV3-48	controls-state-change-of	Pathway Commons		IRS2	FGFR1	controls-state-change-of	Pathway Commons		PDHB	GCAT	catalysis-precedes	Pathway Commons		FLT3	ZMYM2	controls-state-change-of	Pathway Commons		CDC37	ABI1	controls-state-change-of	Pathway Commons		HLA-E	CD3G	controls-state-change-of	Pathway Commons		HSP90AA1	AKT3	controls-state-change-of	Pathway Commons		CD247	FGF18	controls-state-change-of	Pathway Commons
IL33	IGKV1-39	controls-state-change-of	Pathway Commons		TRAT1	GNG11	controls-state-change-of	Pathway Commons		KITLG	BAIAP2	controls-state-change-of	Pathway Commons		STAT1	PDPK1	controls-state-change-of	Pathway Commons		CLTC	FCGR3A	controls-state-change-of	Pathway Commons		KLRK1	FGFR1OP2	controls-state-change-of	Pathway Commons		GNB4	CD247	controls-state-change-of	Pathway Commons		FGFR2	FGFR3	controls-state-change-of	Pathway Commons
IL1RL1	IGLV2-8	controls-state-change-of	Pathway Commons		CD247	AKT3	controls-state-change-of	Pathway Commons		GNB5	LAT2	controls-state-change-of	Pathway Commons		PIK3R3	LCK	in-complex-with	Pathway Commons		EREG	CUX1	controls-state-change-of	Pathway Commons		PLCG2	GNG7	controls-state-change-of	Pathway Commons		NTRK3	CD86	controls-state-change-of	Pathway Commons		CD247	AKT2	controls-state-change-of	Pathway Commons
FYN	GNG4	controls-state-change-of	Pathway Commons		GRAP2	IGLC2	controls-state-change-of	Pathway Commons		IRS2	WASF2	controls-state-change-of	Pathway Commons		DCTN1	GNB1	controls-state-change-of	Pathway Commons		B2M	GNB2	controls-state-change-of	Pathway Commons		PIK3R5	GNG7	controls-state-change-of	Pathway Commons		BDNF	CYFIP1	controls-state-change-of	Pathway Commons		CD247	FGFR4	controls-state-change-of	Pathway Commons
IGLV2-11	TXK	controls-state-change-of	Pathway Commons		KLRD1	IGKV3-11	controls-state-change-of	Pathway Commons		MYD88	TRIM24	controls-state-change-of	Pathway Commons		AREG	CD28	controls-state-change-of	Pathway Commons		HSP90AA1	BRK1	controls-state-change-of	Pathway Commons		PIP5K1A	PIK3R5	catalysis-precedes	Pathway Commons		CD28	INPP5K	catalysis-precedes	Pathway Commons		GNB5	FGFR4	controls-state-change-of	Pathway Commons
GNG3	FCGR2A	controls-state-change-of	Pathway Commons		B2M	IGHV3-33	controls-state-change-of	Pathway Commons		EGF	BRK1	controls-state-change-of	Pathway Commons		CLTC	PDPK1	controls-state-change-of	Pathway Commons		PIP4K2A	B2M	catalysis-precedes	Pathway Commons		GNB1	NCKAP1	controls-state-change-of	Pathway Commons		MYD88	CYFIP2	controls-state-change-of	Pathway Commons		FN1	LCK	controls-state-change-of	Pathway Commons
TRAT1	IGLC2	controls-state-change-of	Pathway Commons		IRAK4	GNB4	controls-state-change-of	Pathway Commons		FGF20	BTK	controls-state-change-of	Pathway Commons		MYD88	FCGR3A	controls-state-change-of	Pathway Commons		TYROBP	GNB1	controls-state-change-of	Pathway Commons		DVL2	INPPL1	catalysis-precedes	Pathway Commons		GAB2	GNG10	controls-state-change-of	Pathway Commons		FGFR3	INPP5D	catalysis-precedes	Pathway Commons
IGKV1D-39	LCK	controls-state-change-of	Pathway Commons		CD86	IGHG4	controls-state-change-of	Pathway Commons		GNG4	FCGR1A	controls-state-change-of	Pathway Commons		GNG2	INPP5K	catalysis-precedes	Pathway Commons		RHOG	WASF2	controls-state-change-of	Pathway Commons		EREG	GAB2	controls-state-change-of	Pathway Commons		LAT2	SYK	controls-state-change-of	Pathway Commons		KLRC2	FGFR2	controls-state-change-of	Pathway Commons
CD3G	IGHV1-69	controls-state-change-of	Pathway Commons		TYROBP	CYFIP2	controls-state-change-of	Pathway Commons		TREM2	LAT2	controls-state-change-of	Pathway Commons		PIK3R3	INPP5K	catalysis-precedes	Pathway Commons		PIK3AP1	WASF2	controls-state-change-of	Pathway Commons		MYD88	IGKC	controls-state-change-of	Pathway Commons		CD28	FCGR1A	controls-state-change-of	Pathway Commons		KLRC2	CD79B	controls-state-change-of	Pathway Commons
IGKV3-20	CD28	controls-state-change-of	Pathway Commons		GNG2	IGHG2	controls-state-change-of	Pathway Commons		GNG12	FCGR1A	controls-state-change-of	Pathway Commons		KLRD1	CD3G	controls-state-change-of	Pathway Commons		RAC2	BRK1	controls-state-change-of	Pathway Commons		CD86	NCK1	controls-state-change-of	Pathway Commons		PDGFRA	LCK	controls-state-change-of	Pathway Commons		INPP5D	FCGR2A	controls-state-change-of	Pathway Commons
PTAFR	SNAP25	interacts-with	APPIC		IGHG3	IGKV4-1	controls-state-change-of	Pathway Commons		GNG12	LCP2	controls-state-change-of	Pathway Commons		FLT3	ABI2	controls-state-change-of	Pathway Commons		RAC1	FCGR2A	controls-state-change-of	Pathway Commons		THOC5	LAT2	controls-state-change-of	Pathway Commons		FN1	GNG11	controls-state-change-of	Pathway Commons		PIK3CG	FGFR3	controls-state-change-of	Pathway Commons
RAC2	IGKV2-30	controls-state-change-of	Pathway Commons		IGKC	INPP5K	catalysis-precedes	Pathway Commons		ALDH2	PDHB	catalysis-precedes	Pathway Commons		TRIM24	GNG2	controls-state-change-of	Pathway Commons		AREG	FGFR1OP2	controls-state-change-of	Pathway Commons		FLT3LG	CPSF6	controls-state-change-of	Pathway Commons		TREM2	GAB2	controls-state-change-of	Pathway Commons		PDGFA	ITK	controls-state-change-of	Pathway Commons
CD28	IGHV4-34	controls-state-change-of	Pathway Commons		PIK3R5	CD79A	controls-state-change-of	Pathway Commons		JAK2	SYK	controls-state-change-of	Pathway Commons		SOS1	PLCG2	controls-state-change-of	Pathway Commons		MYD88	RHOA	controls-state-change-of	Pathway Commons		KLRD1	FGF2	controls-state-change-of	Pathway Commons		FLT3LG	MDK	controls-state-change-of	Pathway Commons		KITLG	FGF18	controls-state-change-of	Pathway Commons
ERLIN2	IGKV2-29	controls-state-change-of	Pathway Commons		GAB3	SHC1	controls-state-change-of	Pathway Commons		PIK3AP1	GNG12	controls-state-change-of	Pathway Commons		GNB1	AKT3	controls-state-change-of	Pathway Commons		GOLGB1	NRAS	controls-state-change-of	Pathway Commons		INPPL1	LAT	controls-state-change-of	Pathway Commons		PIP4K2A	PIK3AP1	catalysis-precedes	Pathway Commons		PIK3R3	LCK	in-complex-with	Pathway Commons
EPOR	IGHG3	controls-state-change-of	Pathway Commons		GAB3	IGHV3-23	controls-state-change-of	Pathway Commons		PIP5K1B	IRAK1	catalysis-precedes	Pathway Commons		GNG10	TXK	controls-state-change-of	Pathway Commons		RAC2	CUX1	controls-state-change-of	Pathway Commons		GAB2	INPPL1	catalysis-precedes	Pathway Commons		CPSF6	SH3KBP1	controls-state-change-of	Pathway Commons		GNB5	FGF18	controls-state-change-of	Pathway Commons
CD28	FCGR1A	controls-state-change-of	Pathway Commons		CD80	IGLV6-57	controls-state-change-of	Pathway Commons		LYN	GNB5	controls-state-change-of	Pathway Commons		FRS2	FCGR3A	controls-state-change-of	Pathway Commons		LYN	TFG	controls-state-change-of	Pathway Commons		VAV1	SHC1	controls-state-change-of	Pathway Commons		MET	RAC1	controls-state-change-of	Pathway Commons		AREG	CD28	controls-state-change-of	Pathway Commons
IL33	IGLV1-51	controls-state-change-of	Pathway Commons		KDR	IGLC3	controls-state-change-of	Pathway Commons		PIP5K1B	CD86	catalysis-precedes	Pathway Commons		PIK3R4	CNTRL	controls-state-change-of	Pathway Commons		RHOG	FCGR3A	controls-state-change-of	Pathway Commons		DCTN1	LCK	controls-state-change-of	Pathway Commons		PIP4K2A	SYK	catalysis-precedes	Pathway Commons		GNG11	GRAP2	controls-state-change-of	Pathway Commons
IGLV1-51	GNG3	controls-state-change-of	Pathway Commons		NTRK2	CD86	controls-state-change-of	Pathway Commons		IL34	WASF2	controls-state-change-of	Pathway Commons		CNTRL	PLCG2	controls-state-change-of	Pathway Commons		UQCRC1	SDHB	catalysis-precedes	Pathway Commons		ACAA2	DLD	catalysis-precedes	Pathway Commons		PDGFRA	FGF7	controls-state-change-of	Pathway Commons		KIT	MDK	controls-state-change-of	Pathway Commons
IGLV3-1	LCK	controls-state-change-of	Pathway Commons		ICOS	IGLC2	controls-state-change-of	Pathway Commons		MYD88	FCGR1A	controls-state-change-of	Pathway Commons		PIK3AP1	GNB5	controls-state-change-of	Pathway Commons		KIF5B	RHOA	controls-state-change-of	Pathway Commons		IL33	SHC1	controls-state-change-of	Pathway Commons		CSF1R	ABI1	controls-state-change-of	Pathway Commons		CD247	FGF2	controls-state-change-of	Pathway Commons
CD247	IGHM	controls-state-change-of	Pathway Commons		AREG	ITK	controls-state-change-of	Pathway Commons		NTRK3	INPP5D	catalysis-precedes	Pathway Commons		CBL	PLCG2	controls-state-change-of	Pathway Commons		ANAPC11	UBE2E1	in-complex-with	Pathway Commons		LCK	FCGR1A	controls-state-change-of	Pathway Commons		GAB3	FCGR2A	controls-state-change-of	Pathway Commons		KLRD1	CD3G	controls-state-change-of	Pathway Commons
IL34	CD79B	controls-state-change-of	Pathway Commons		IGLC2	DAPP1	controls-state-change-of	Pathway Commons		FGFR3	TRIM24	controls-state-change-of	Pathway Commons		SH2D2A	GRAP2	controls-state-change-of	Pathway Commons		IRS2	NCKAP1L	controls-state-change-of	Pathway Commons		CD86	LAT2	controls-state-change-of	Pathway Commons		MDK	CYFIP2	controls-state-change-of	Pathway Commons		KLRC2	GRAP2	controls-state-change-of	Pathway Commons
KLRD1	IGKV4-1	controls-state-change-of	Pathway Commons		RAC2	PIK3R2	in-complex-with	Pathway Commons		HSPA1A	HSP90AB1	in-complex-with	Pathway Commons		PIK3R4	FYN	controls-state-change-of	Pathway Commons		ACO2	IDH2	catalysis-precedes	Pathway Commons		PIK3R1	FGF2	controls-state-change-of	Pathway Commons		GNB4	VAV2	controls-state-change-of	Pathway Commons		FGFR2	CD247	controls-state-change-of	Pathway Commons
IGHV3-33	FGFR4	controls-state-change-of	Pathway Commons		GRAP2	IGHG4	controls-state-change-of	Pathway Commons		GNB4	INPP5D	catalysis-precedes	Pathway Commons		PIP4K2A	CD28	catalysis-precedes	Pathway Commons		FCGR2A	GNB1	controls-state-change-of	Pathway Commons		KLRD1	SOS1	controls-state-change-of	Pathway Commons		ESR1	LCP2	controls-state-change-of	Pathway Commons		ERBB2	MYO18A	controls-state-change-of	Pathway Commons
IGLV3-25	LCK	controls-state-change-of	Pathway Commons		PIK3CG	IGHV4-59	controls-state-change-of	Pathway Commons		PIP5K1B	GNG12	catalysis-precedes	Pathway Commons		JAK2	GNG7	controls-state-change-of	Pathway Commons		CSF1R	BAIAP2	controls-state-change-of	Pathway Commons		PIP5K1B	HCK	catalysis-precedes	Pathway Commons		GNG10	GRB2	controls-state-change-of	Pathway Commons		ERBB2	GNG12	controls-state-change-of	Pathway Commons
CD80	IGLC2	controls-state-change-of	Pathway Commons		SHC1	CD28	controls-state-change-of	Pathway Commons		PIP5K1B	LAT2	catalysis-precedes	Pathway Commons		IRAK4	AKT3	controls-state-change-of	Pathway Commons		VEGFA	LRRFIP1	controls-state-change-of	Pathway Commons		LAT2	CNTRL	controls-state-change-of	Pathway Commons		SHC1	DAPP1	controls-state-change-of	Pathway Commons		BDNF	HRAS	controls-state-change-of	Pathway Commons
EREG	GNG2	controls-state-change-of	Pathway Commons		CD28	CD79A	controls-state-change-of	Pathway Commons		GNG4	CD86	controls-state-change-of	Pathway Commons		TRIM24	NCK1	controls-state-change-of	Pathway Commons		GRB2	ZMYM2	controls-state-change-of	Pathway Commons		CD3G	PLCG2	controls-state-change-of	Pathway Commons		FGF7	SYK	controls-state-change-of	Pathway Commons		NTRK2	GNB5	controls-state-change-of	Pathway Commons
MYD88	IGLC7	controls-state-change-of	Pathway Commons		KLB	VAV1	controls-state-change-of	Pathway Commons		NTRK2	BTK	controls-state-change-of	Pathway Commons		GRAP2	AKT3	controls-state-change-of	Pathway Commons		HLA-E	TFG	controls-state-change-of	Pathway Commons		IL33	DAPP1	controls-state-change-of	Pathway Commons		CBL	IGKC	controls-state-change-of	Pathway Commons		TGFA	CD28	controls-state-change-of	Pathway Commons
FLT3	BLNK	controls-state-change-of	Pathway Commons		JAK2	IGKC	controls-state-change-of	Pathway Commons		INPP5D	FCGR1A	controls-state-change-of	Pathway Commons		ERLIN2	GNB1	controls-state-change-of	Pathway Commons		EML4	NCKAP1L	controls-state-change-of	Pathway Commons		IL33	CD79B	controls-state-change-of	Pathway Commons		SHC1	BLNK	controls-state-change-of	Pathway Commons		PDGFA	BAIAP2	controls-state-change-of	Pathway Commons
GAB3	FCGR2A	controls-state-change-of	Pathway Commons		PDGFB	IGLC2	controls-state-change-of	Pathway Commons		CD86	GNB5	controls-state-change-of	Pathway Commons		ZMYM2	FCGR3A	controls-state-change-of	Pathway Commons		STAT1	LAT2	controls-state-change-of	Pathway Commons		FGFR1	ATIC	controls-state-change-of	Pathway Commons		GNG2	DAPP1	controls-state-change-of	Pathway Commons		VEGFA	GRAP2	controls-state-change-of	Pathway Commons
ESR1	LCP2	controls-state-change-of	Pathway Commons		FCGR2A	IGLV2-8	controls-state-change-of	Pathway Commons		CSF1	BAIAP2	controls-state-change-of	Pathway Commons		FCGR3A	PDPK1	controls-state-change-of	Pathway Commons		CPSF6	BAIAP2	controls-state-change-of	Pathway Commons		IL33	CD247	controls-state-change-of	Pathway Commons		GNG7	CPSF6	controls-state-change-of	Pathway Commons		SH2D2A	GRAP2	controls-state-change-of	Pathway Commons
TRAT1	BLNK	controls-state-change-of	Pathway Commons		FGFR1	FCGR3A	controls-state-change-of	Pathway Commons		GAB3	BTK	controls-state-change-of	Pathway Commons		PIK3AP1	TFG	controls-state-change-of	Pathway Commons		GNB2	GRB2	controls-state-change-of	Pathway Commons		FGFR1OP2	AKT3	controls-state-change-of	Pathway Commons		MYD88	INPP5D	catalysis-precedes	Pathway Commons		FCGR2A	ITK	controls-state-change-of	Pathway Commons
PIK3R6	IGHG3	controls-state-change-of	Pathway Commons		IGKV1-39	TXK	controls-state-change-of	Pathway Commons		CSF1R	CD247	controls-state-change-of	Pathway Commons		PIK3AP1	PLCG2	controls-state-change-of	Pathway Commons		GNB1	LAT2	controls-state-change-of	Pathway Commons		SOS1	CD3G	controls-state-change-of	Pathway Commons		GNG11	CD28	controls-state-change-of	Pathway Commons		BTC	PLCG1	controls-state-change-of	Pathway Commons
FLT3	IGKV2-28	controls-state-change-of	Pathway Commons		IGHG2	IGHV2-5	controls-state-change-of	Pathway Commons		INPP5D	GNG4	controls-state-change-of	Pathway Commons		STAT1	CD247	controls-state-change-of	Pathway Commons		GNB2	LRRFIP1	controls-state-change-of	Pathway Commons		CD247	GNB1	controls-state-change-of	Pathway Commons		PIK3CG	LCK	controls-state-change-of	Pathway Commons		FGF10	FCGR2A	controls-state-change-of	Pathway Commons
IGLV3-25	LCP2	controls-state-change-of	Pathway Commons		PDGFA	ABI1	controls-state-change-of	Pathway Commons		TREM2	GNB5	controls-state-change-of	Pathway Commons		CDC37	ABI2	controls-state-change-of	Pathway Commons		GOLGB1	KRAS	controls-state-change-of	Pathway Commons		GNG7	CD86	controls-state-change-of	Pathway Commons		IRS2	GNG10	controls-state-change-of	Pathway Commons		KLRD1	GNG11	controls-state-change-of	Pathway Commons
ERLIN2	IGHV1-2	controls-state-change-of	Pathway Commons		CD3G	FYN	controls-state-change-of	Pathway Commons		TRIM24	VAV3	controls-state-change-of	Pathway Commons		PIP4K2B	CDC37	catalysis-precedes	Pathway Commons		CDC37	FCGR2A	controls-state-change-of	Pathway Commons		HBEGF	CYFIP2	controls-state-change-of	Pathway Commons		PDGFB	LAT	controls-state-change-of	Pathway Commons		ERBB2	GNG11	controls-state-change-of	Pathway Commons
ESR1	ERLIN2	controls-state-change-of	Pathway Commons		KLB	ALKAL2	controls-state-change-of	Pathway Commons		CD247	TRIM24	controls-state-change-of	Pathway Commons		PLCG2	INPP5K	catalysis-precedes	Pathway Commons		IL1RAP	BRK1	controls-state-change-of	Pathway Commons		KLRK1	BAG4	controls-state-change-of	Pathway Commons		MDK	INPP5D	catalysis-precedes	Pathway Commons		TGFA	GNG11	controls-state-change-of	Pathway Commons
CD80	IGKV4-1	controls-state-change-of	Pathway Commons		DCTN1	NCKAP1L	controls-state-change-of	Pathway Commons		FGF20	LCK	controls-state-change-of	Pathway Commons		AREG	AKT3	controls-state-change-of	Pathway Commons		PIK3AP1	CPSF6	controls-state-change-of	Pathway Commons		STAT1	NCKAP1	controls-state-change-of	Pathway Commons		ZMYM2	GNB4	controls-state-change-of	Pathway Commons		PIP4K2B	MYO18A	catalysis-precedes	Pathway Commons
EPGN	IGHG4	controls-state-change-of	Pathway Commons		FCGR2A	IGHV2-5	controls-state-change-of	Pathway Commons		EREG	VAV2	controls-state-change-of	Pathway Commons		PIK3R4	CD28	controls-state-change-of	Pathway Commons		PIP4K2A	VEGFA	catalysis-precedes	Pathway Commons		FN1	PTN	controls-state-change-of	Pathway Commons		AXL	NCK1	controls-state-change-of	Pathway Commons		FGFR2	AKT2	controls-state-change-of	Pathway Commons
KLRK1	LCK	controls-state-change-of	Pathway Commons		GAB1	IGHM	controls-state-change-of	Pathway Commons		CDC5L	HSP90B1	interacts-with	APPIC		IRAK4	ATIC	controls-state-change-of	Pathway Commons		PIP4K2A	FGFR1OP2	catalysis-precedes	Pathway Commons		TYROBP	FGF2	controls-state-change-of	Pathway Commons		CD86	FCGR2A	controls-state-change-of	Pathway Commons		CD19	INPP5D	catalysis-precedes	Pathway Commons
CD86	FCGR2A	controls-state-change-of	Pathway Commons		TRAF6	CD86	controls-state-change-of	Pathway Commons		GNB2	LCK	controls-state-change-of	Pathway Commons		GNG10	RAC1	controls-state-change-of	Pathway Commons		STAT3	MECP2	controls-state-change-of	Pathway Commons		INPP5D	CYFIP2	controls-state-change-of	Pathway Commons		CNTRL	FCGR1A	controls-state-change-of	Pathway Commons		MYO18A	INPP5D	catalysis-precedes	Pathway Commons
CD28	FCGR2A	controls-state-change-of	Pathway Commons		PDGFA	INPP5D	catalysis-precedes	Pathway Commons		PC	TYMP	catalysis-precedes	Pathway Commons		PTPN11	GNB1	controls-state-change-of	Pathway Commons		HSP90AA1	CPSF6	controls-state-change-of	Pathway Commons		TYROBP	SOS1	controls-state-change-of	Pathway Commons		CD28	FCGR2A	controls-state-change-of	Pathway Commons		KDR	MYO18A	controls-state-change-of	Pathway Commons
FCGR3A	IGKV1-5	controls-state-change-of	Pathway Commons		IGLV1-40	VAV1	controls-state-change-of	Pathway Commons		CD86	CYFIP1	controls-state-change-of	Pathway Commons		GOT2	DLD	catalysis-precedes	Pathway Commons		EML4	LCP2	controls-state-change-of	Pathway Commons		STAT1	PTN	controls-state-change-of	Pathway Commons		STRN	LAT2	controls-state-change-of	Pathway Commons		HBEGF	TXK	controls-state-change-of	Pathway Commons
CD28	IGHV2-5	controls-state-change-of	Pathway Commons		IGHG2	IGKV4-1	controls-state-change-of	Pathway Commons		GNB2	CYFIP1	controls-state-change-of	Pathway Commons		PIP4K2B	CLTC	catalysis-precedes	Pathway Commons		EML4	ABI1	controls-state-change-of	Pathway Commons		ACO2	ACO1	catalysis-precedes	Pathway Commons		MET	VAV2	controls-state-change-of	Pathway Commons		PTN	FCGR2A	controls-state-change-of	Pathway Commons
EPGN	IGLC7	controls-state-change-of	Pathway Commons		PIP4K2A	IRAK4	catalysis-precedes	Pathway Commons		STAT1	FCGR2A	controls-state-change-of	Pathway Commons		STAT1	AKT2	controls-state-change-of	Pathway Commons		FCGR3A	BAIAP2	controls-state-change-of	Pathway Commons		CD247	AKT2	controls-state-change-of	Pathway Commons		BDNF	DAPP1	controls-state-change-of	Pathway Commons		FGFR1	GRAP2	controls-state-change-of	Pathway Commons
HGF	IGLV3-19	controls-state-change-of	Pathway Commons		FCGR1A	IGLC6	controls-state-change-of	Pathway Commons		FGFR3	FCGR1A	controls-state-change-of	Pathway Commons		STAT1	CD3G	controls-state-change-of	Pathway Commons		HCK	GNB2	controls-state-change-of	Pathway Commons		SUCLG1	DLD	catalysis-precedes	Pathway Commons		NTRK3	GNB4	controls-state-change-of	Pathway Commons		BTC	GRAP2	controls-state-change-of	Pathway Commons
FGFR4	IGLC1	controls-state-change-of	Pathway Commons		FCGR1A	CD3G	controls-state-change-of	Pathway Commons		GNG2	FCGR1A	controls-state-change-of	Pathway Commons		SYK	FYN	controls-state-change-of	Pathway Commons		AREG	RHOA	controls-state-change-of	Pathway Commons		SH2D2A	GRB2	controls-state-change-of	Pathway Commons		CNTRL	FCGR2A	controls-state-change-of	Pathway Commons		CSF1	TEC	controls-state-change-of	Pathway Commons
FLT3	IGHG2	controls-state-change-of	Pathway Commons		KDR	GNB4	controls-state-change-of	Pathway Commons		PIK3R4	VAV2	controls-state-change-of	Pathway Commons		SHC1	GNB1	controls-state-change-of	Pathway Commons		MDH1	MDH2	catalysis-precedes	Pathway Commons		HSP90AB1	HSPA1A	in-complex-with	Pathway Commons		IGHG4	BTK	controls-state-change-of	Pathway Commons		FGF7	LAT	controls-state-change-of	Pathway Commons
RAC2	IGKV2D-28	controls-state-change-of	Pathway Commons		FGFR1OP2	IGKV1-5	controls-state-change-of	Pathway Commons		VEGFA	WASF2	controls-state-change-of	Pathway Commons		LCK	VAV3	controls-state-change-of	Pathway Commons		CLTC	LAT2	controls-state-change-of	Pathway Commons		BAG4	ATIC	controls-state-change-of	Pathway Commons		BDNF	CNTRL	controls-state-change-of	Pathway Commons		TREM2	CD3G	controls-state-change-of	Pathway Commons
IGHG4	BTK	controls-state-change-of	Pathway Commons		CNTRL	CD3G	controls-state-change-of	Pathway Commons		SUCLG1	OXCT1	catalysis-precedes	Pathway Commons		NOS3	MDH1	catalysis-precedes	Pathway Commons		CDC37	LCP2	controls-state-change-of	Pathway Commons		PIK3R1	GNG7	controls-state-change-of	Pathway Commons		INPP5D	TXK	controls-state-change-of	Pathway Commons		VEGFA	MDK	controls-state-change-of	Pathway Commons
FGF7	IGHV3-9	controls-state-change-of	Pathway Commons		IGKV4-1	FYN	controls-state-change-of	Pathway Commons		HCK	GNB5	controls-state-change-of	Pathway Commons		HLA-E	GNB5	controls-state-change-of	Pathway Commons		HSP90AA1	LAT2	controls-state-change-of	Pathway Commons		LYN	CNTRL	controls-state-change-of	Pathway Commons		MYD88	BTK	controls-state-change-of	Pathway Commons		AXL	FCGR3A	controls-state-change-of	Pathway Commons
MYD88	BTK	controls-state-change-of	Pathway Commons		TREM2	IGLV3-19	controls-state-change-of	Pathway Commons		CSF1	SYK	controls-state-change-of	Pathway Commons		B2M	ITK	controls-state-change-of	Pathway Commons		GRB2	CPSF6	controls-state-change-of	Pathway Commons		PIK3CD	CPSF6	controls-state-change-of	Pathway Commons		GAB3	INPP5D	catalysis-precedes	Pathway Commons		CD28	MDK	controls-state-change-of	Pathway Commons
IGHV3-33	LAT2	controls-state-change-of	Pathway Commons		PIK3AP1	IGKV1-12	controls-state-change-of	Pathway Commons		HLA-E	BAIAP2	controls-state-change-of	Pathway Commons		SOS1	ATIC	controls-state-change-of	Pathway Commons		FGFR1OP2	GNB1	controls-state-change-of	Pathway Commons		THOC5	GRB2	controls-state-change-of	Pathway Commons		GNG11	IGHG1	controls-state-change-of	Pathway Commons		CD28	FGFR4	controls-state-change-of	Pathway Commons
IGLV1-40	LAT2	controls-state-change-of	Pathway Commons		CSF1R	IGLC3	controls-state-change-of	Pathway Commons		EREG	BCR	controls-state-change-of	Pathway Commons		TRIM24	FCGR3A	controls-state-change-of	Pathway Commons		GNB2	RAC1	controls-state-change-of	Pathway Commons		IRAK4	SH3KBP1	controls-state-change-of	Pathway Commons		MET	LCK	controls-state-change-of	Pathway Commons		FGFR1	ITK	controls-state-change-of	Pathway Commons
KLRK1	PTN	controls-state-change-of	Pathway Commons		ESR2	CD79B	controls-state-change-of	Pathway Commons		TRIM24	FGF20	controls-state-change-of	Pathway Commons		OXCT1	SUCLG2	catalysis-precedes	Pathway Commons		NPM1	SKP1	in-complex-with	Pathway Commons		GRB2	CYFIP2	controls-state-change-of	Pathway Commons		PDGFRA	TXK	controls-state-change-of	Pathway Commons		INPP5D	PTN	controls-state-change-of	Pathway Commons
KLRK1	PLCG2	controls-state-change-of	Pathway Commons		VAV1	NCKAP1L	controls-state-change-of	Pathway Commons		TREM2	BAIAP2	controls-state-change-of	Pathway Commons		CDC37	INPP5K	catalysis-precedes	Pathway Commons		RHOG	ABI1	controls-state-change-of	Pathway Commons		LRRFIP1	INPP5D	catalysis-precedes	Pathway Commons		PIK3R5	FGF1	controls-state-change-of	Pathway Commons		MDK	GNG11	controls-state-change-of	Pathway Commons
HCK	IGKV3-15	controls-state-change-of	Pathway Commons		CD86	CYFIP2	controls-state-change-of	Pathway Commons		STAT3	PLCG2	controls-state-change-of	Pathway Commons		IRS2	AKT3	controls-state-change-of	Pathway Commons		MDH1	SOD1	catalysis-precedes	Pathway Commons		FN1	LCK	controls-state-change-of	Pathway Commons		TRAF6	DAPP1	controls-state-change-of	Pathway Commons		IL33	INPP5J	catalysis-precedes	Pathway Commons
HGF	IGLV6-57	controls-state-change-of	Pathway Commons		IGHV4-39	PLCG2	controls-state-change-of	Pathway Commons		ERBB2	LAT2	controls-state-change-of	Pathway Commons		AREG	DAPP1	controls-state-change-of	Pathway Commons		PIK3AP1	NCKAP1L	controls-state-change-of	Pathway Commons		GNB1	DAPP1	controls-state-change-of	Pathway Commons		IRS2	CD86	controls-state-change-of	Pathway Commons		CD28	TEC	controls-state-change-of	Pathway Commons
TRAT1	CD79B	controls-state-change-of	Pathway Commons		EREG	IGHV2-5	controls-state-change-of	Pathway Commons		GNG4	CD247	controls-state-change-of	Pathway Commons		IRS2	ZMYM2	controls-state-change-of	Pathway Commons		HSP90AA1	KRAS	controls-state-change-of	Pathway Commons		INPP5D	FCGR2A	controls-state-change-of	Pathway Commons		PDGFRA	GNG10	controls-state-change-of	Pathway Commons		HBEGF	LAT	controls-state-change-of	Pathway Commons
CD86	IGKV3-15	controls-state-change-of	Pathway Commons		IGLV3-25	GNG11	controls-state-change-of	Pathway Commons		FN1	GNG2	controls-state-change-of	Pathway Commons		PLCG2	TRIM24	controls-state-change-of	Pathway Commons		CDC37	GNB2	controls-state-change-of	Pathway Commons		GRB2	TRIM24	controls-state-change-of	Pathway Commons		BDNF	NCKAP1L	controls-state-change-of	Pathway Commons		KIT	FGF2	controls-state-change-of	Pathway Commons
KLRD1	IGKV1-33	controls-state-change-of	Pathway Commons		EREG	GNG11	controls-state-change-of	Pathway Commons		AXL	GNG12	controls-state-change-of	Pathway Commons		RAC2	CD247	controls-state-change-of	Pathway Commons		CLTC	BRK1	controls-state-change-of	Pathway Commons		SYK	LRRFIP1	controls-state-change-of	Pathway Commons		PIK3AP1	RAC1	controls-state-change-of	Pathway Commons		KLRK1	MDK	controls-state-change-of	Pathway Commons
IGKV2-30	FGFR1	controls-state-change-of	Pathway Commons		AXL	IGLV1-40	controls-state-change-of	Pathway Commons		CSF1R	GNG12	controls-state-change-of	Pathway Commons		MDH1	NOS3	catalysis-precedes	Pathway Commons		FCGR2A	CPSF6	controls-state-change-of	Pathway Commons		MDK	IGHD	controls-state-change-of	Pathway Commons		GAB2	PTN	controls-state-change-of	Pathway Commons		AREG	FGF10	controls-state-change-of	Pathway Commons
EPOR	IGHV3-11	controls-state-change-of	Pathway Commons		PIP4K2A	AREG	catalysis-precedes	Pathway Commons		VEGFA	LCK	controls-state-change-of	Pathway Commons		GNB1	LCP2	controls-state-change-of	Pathway Commons		LRRFIP1	GNB2	controls-state-change-of	Pathway Commons		PIP5K1B	VEGFA	catalysis-precedes	Pathway Commons		IGHG4	GNB5	controls-state-change-of	Pathway Commons		MYO18A	FGFR1	controls-state-change-of	Pathway Commons
IGKV1D-39	LAT2	controls-state-change-of	Pathway Commons		VEGFA	GNG2	controls-state-change-of	Pathway Commons		NTRK2	WASF2	controls-state-change-of	Pathway Commons		PIK3AP1	LAT	controls-state-change-of	Pathway Commons		IDH2	ACO2	catalysis-precedes	Pathway Commons		HCK	CD86	controls-state-change-of	Pathway Commons		CNTRL	LCK	controls-state-change-of	Pathway Commons		CSF1R	PLCG1	controls-state-change-of	Pathway Commons
PLCG2	IGLV1-44	controls-state-change-of	Pathway Commons		MMP9	LYZ	interacts-with	APPIC		FCGR2A	VAV2	controls-state-change-of	Pathway Commons		GRAP2	INPP5K	catalysis-precedes	Pathway Commons		LRRFIP1	BRK1	controls-state-change-of	Pathway Commons		DCTN1	GNB1	controls-state-change-of	Pathway Commons		PIK3CB	GAB2	controls-state-change-of	Pathway Commons		MDK	FGFR2	controls-state-change-of	Pathway Commons
PDGFRB	CD80	controls-state-change-of	Pathway Commons		STAT1	IGLV2-8	controls-state-change-of	Pathway Commons		PIK3R4	SYK	controls-state-change-of	Pathway Commons		AREG	GNG7	controls-state-change-of	Pathway Commons		B2M	ZMYM2	controls-state-change-of	Pathway Commons		IL33	NCK1	controls-state-change-of	Pathway Commons		ZMYM2	BTK	controls-state-change-of	Pathway Commons		AXL	CD247	controls-state-change-of	Pathway Commons
GNG3	IGKV1D-39	controls-state-change-of	Pathway Commons		IGLV3-19	LAT	controls-state-change-of	Pathway Commons		CD86	FGF2	controls-state-change-of	Pathway Commons		EREG	NCK1	controls-state-change-of	Pathway Commons		STAT3	FCGR3A	controls-state-change-of	Pathway Commons		INPP5D	LCP2	controls-state-change-of	Pathway Commons		GNG11	INPP5K	catalysis-precedes	Pathway Commons		HGF	FGF10	controls-state-change-of	Pathway Commons
ERLIN2	IGKV1-5	controls-state-change-of	Pathway Commons		TRAF6	CD3G	controls-state-change-of	Pathway Commons		MYD88	BCR	controls-state-change-of	Pathway Commons		TRIM24	FYN	controls-state-change-of	Pathway Commons		RAC2	NPM1	controls-state-change-of	Pathway Commons		CD247	FGF2	controls-state-change-of	Pathway Commons		GAB2	CD79B	controls-state-change-of	Pathway Commons		FGFR4	CYFIP2	controls-state-change-of	Pathway Commons
CD3G	FGFR4	controls-state-change-of	Pathway Commons		IGHG3	IGLV6-57	controls-state-change-of	Pathway Commons		GNG4	FCGR2A	controls-state-change-of	Pathway Commons		CD28	ATIC	controls-state-change-of	Pathway Commons		HSP90AA1	NRAS	controls-state-change-of	Pathway Commons		MYD88	FCGR3A	controls-state-change-of	Pathway Commons		PDGFB	AKT3	controls-state-change-of	Pathway Commons		EPOR	FGFR4	controls-state-change-of	Pathway Commons
VEGFA	IGHG1	controls-state-change-of	Pathway Commons		KLB	CD79A	controls-state-change-of	Pathway Commons		CSF1R	BTK	controls-state-change-of	Pathway Commons		SYK	GNB5	controls-state-change-of	Pathway Commons		PIK3AP1	FGFR1OP2	controls-state-change-of	Pathway Commons		TREM2	CPSF6	controls-state-change-of	Pathway Commons		PIP4K2A	FGFR1	catalysis-precedes	Pathway Commons		PTN	GNG2	controls-state-change-of	Pathway Commons
FGFR4	CD86	controls-state-change-of	Pathway Commons		GRAP2	IGHV2-5	controls-state-change-of	Pathway Commons		CSF1R	GNG2	controls-state-change-of	Pathway Commons		NEFL	NRAS	controls-state-change-of	Pathway Commons		IL1RAP	GNB2	controls-state-change-of	Pathway Commons		KLRD1	CD3G	controls-state-change-of	Pathway Commons		MDK	NCK1	controls-state-change-of	Pathway Commons		ERBB2	FGFR1	controls-state-change-of	Pathway Commons
CD86	IGKV1-33	controls-state-change-of	Pathway Commons		KDR	ALKAL2	controls-state-change-of	Pathway Commons		MYD88	GNG2	controls-state-change-of	Pathway Commons		GNB5	INPP5K	catalysis-precedes	Pathway Commons		CDC37	SH3KBP1	controls-state-change-of	Pathway Commons		LRRFIP1	LAT2	controls-state-change-of	Pathway Commons		GNGT2	IGHG3	controls-state-change-of	Pathway Commons		CD19	ITK	controls-state-change-of	Pathway Commons
CD3G	IGHV3-7	controls-state-change-of	Pathway Commons		IGHG3	IGHV4-34	controls-state-change-of	Pathway Commons		HLA-E	LCK	controls-state-change-of	Pathway Commons		PIK3CD	CD28	controls-state-change-of	Pathway Commons		RAC1	GRB2	controls-state-change-of	Pathway Commons		HBEGF	LCP2	controls-state-change-of	Pathway Commons		DVL1	MYD88	catalysis-precedes	Pathway Commons		HBEGF	GNB5	controls-state-change-of	Pathway Commons
IL34	IGLC1	controls-state-change-of	Pathway Commons		TYROBP	IGHG3	controls-state-change-of	Pathway Commons		EGFR	CD86	controls-state-change-of	Pathway Commons		HLA-E	SOS1	controls-state-change-of	Pathway Commons		VEGFA	LAT2	controls-state-change-of	Pathway Commons		HLA-E	IGHD	controls-state-change-of	Pathway Commons		AREG	GNB3	controls-state-change-of	Pathway Commons		HBEGF	FGFR4	controls-state-change-of	Pathway Commons
IGLV1-40	FGF1	controls-state-change-of	Pathway Commons		FCGR1A	GNG2	controls-state-change-of	Pathway Commons		CD86	BLNK	controls-state-change-of	Pathway Commons		CDC37	ATIC	controls-state-change-of	Pathway Commons		KIF5B	BRK1	controls-state-change-of	Pathway Commons		PIP4K2A	TREM2	catalysis-precedes	Pathway Commons		VEGFA	IGHG1	controls-state-change-of	Pathway Commons		FGF9	MDK	controls-state-change-of	Pathway Commons
IGKV1-39	VAV1	controls-state-change-of	Pathway Commons		PIP4K2A	ESR2	catalysis-precedes	Pathway Commons		EGFR	FGF20	controls-state-change-of	Pathway Commons		PTPN11	TFG	controls-state-change-of	Pathway Commons		ZMYM2	KRAS	controls-state-change-of	Pathway Commons		GAB2	FCGR2A	controls-state-change-of	Pathway Commons		HGF	CPSF6	controls-state-change-of	Pathway Commons		GNG11	PTN	controls-state-change-of	Pathway Commons
PTN	LCK	controls-state-change-of	Pathway Commons		STAT1	ALKAL2	controls-state-change-of	Pathway Commons		PIP5K1B	NTRK2	catalysis-precedes	Pathway Commons		EREG	PDPK1	controls-state-change-of	Pathway Commons		EML4	CD86	controls-state-change-of	Pathway Commons		VEGFA	DAPP1	controls-state-change-of	Pathway Commons		MDK	FGF20	controls-state-change-of	Pathway Commons		EPOR	PTN	controls-state-change-of	Pathway Commons
VEGFA	GNG4	controls-state-change-of	Pathway Commons		CSF1R	IGKV1-12	controls-state-change-of	Pathway Commons		ERBB2	CD247	controls-state-change-of	Pathway Commons		HLA-E	ITK	controls-state-change-of	Pathway Commons		CUX1	GNB1	controls-state-change-of	Pathway Commons		PIP5K1B	HLA-E	catalysis-precedes	Pathway Commons		GLUD1	DHTKD1	catalysis-precedes	Pathway Commons		CSF1	MDK	controls-state-change-of	Pathway Commons
IGHG2	IGHV3-23	controls-state-change-of	Pathway Commons		GNG8	IGHV4-59	controls-state-change-of	Pathway Commons		PIP5K1B	STAT1	catalysis-precedes	Pathway Commons		ZMYM2	RAC1	controls-state-change-of	Pathway Commons		IRAK1	LCP2	controls-state-change-of	Pathway Commons		JAK2	NCKAP1L	controls-state-change-of	Pathway Commons		DVL1	IGHG4	catalysis-precedes	Pathway Commons		FGF18	FGF2	controls-state-change-of	Pathway Commons
IL34	ITK	controls-state-change-of	Pathway Commons		INPP5D	IGKV1-39	controls-state-change-of	Pathway Commons		FCGR1A	FGFR3	controls-state-change-of	Pathway Commons		GNB1	LAT	controls-state-change-of	Pathway Commons		FCGR2A	BAIAP2	controls-state-change-of	Pathway Commons		JAK2	IGHD	controls-state-change-of	Pathway Commons		PTN	LCK	controls-state-change-of	Pathway Commons		PIK3CD	CD28	controls-state-change-of	Pathway Commons
LCK	IGLV3-25	controls-state-change-of	Pathway Commons		KLB	CNTRL	controls-state-change-of	Pathway Commons		LYN	GNG4	controls-state-change-of	Pathway Commons		CLTC	GNG2	controls-state-change-of	Pathway Commons		B2M	RAC1	controls-state-change-of	Pathway Commons		SHC1	BTK	controls-state-change-of	Pathway Commons		HLA-E	VAV2	controls-state-change-of	Pathway Commons		PIP4K2B	FGFR1	catalysis-precedes	Pathway Commons
IGLV2-14	TXK	controls-state-change-of	Pathway Commons		IRS2	IGLV1-51	controls-state-change-of	Pathway Commons		FN1	FCGR2A	controls-state-change-of	Pathway Commons		CD3G	AKT2	controls-state-change-of	Pathway Commons		FGFR1OP2	CD86	controls-state-change-of	Pathway Commons		SOS1	PLCG2	controls-state-change-of	Pathway Commons		JAK2	DAPP1	controls-state-change-of	Pathway Commons		PIK3CD	FGF18	controls-state-change-of	Pathway Commons
LAT2	IGLC1	controls-state-change-of	Pathway Commons		GNG2	IGLC7	controls-state-change-of	Pathway Commons		FGFR3	CD247	controls-state-change-of	Pathway Commons		GRAP2	ABI2	controls-state-change-of	Pathway Commons		FCGR2A	TFG	controls-state-change-of	Pathway Commons		GNB1	AKT3	controls-state-change-of	Pathway Commons		HGF	CYFIP1	controls-state-change-of	Pathway Commons		PIK3R1	INPP5D	catalysis-precedes	Pathway Commons
PIK3R1	IGKV2-29	controls-state-change-of	Pathway Commons		FGFR1	IGHV3-33	controls-state-change-of	Pathway Commons		INPP5D	PLCG2	controls-state-change-of	Pathway Commons		SHC1	AKT3	controls-state-change-of	Pathway Commons		KIF5B	WASF2	controls-state-change-of	Pathway Commons		HBEGF	GNG7	controls-state-change-of	Pathway Commons		IRS1	IGHG3	controls-state-change-of	Pathway Commons		PIK3CD	GNG11	controls-state-change-of	Pathway Commons
HCK	LAT	controls-state-change-of	Pathway Commons		IGKV1-39	GNB5	controls-state-change-of	Pathway Commons		GNG4	WASF2	controls-state-change-of	Pathway Commons		PIK3R1	ERLIN2	controls-state-change-of	Pathway Commons		HSP90AA1	CUX1	controls-state-change-of	Pathway Commons		IL33	PLCG2	controls-state-change-of	Pathway Commons		PIK3CB	FCGR3A	controls-state-change-of	Pathway Commons		HCK	FGF18	controls-state-change-of	Pathway Commons
LCK	IGLV3-1	controls-state-change-of	Pathway Commons		ESR2	BTK	controls-state-change-of	Pathway Commons		PIP5K1B	STAT3	catalysis-precedes	Pathway Commons		GNB5	ITK	controls-state-change-of	Pathway Commons		ACLY	MDH1	catalysis-precedes	Pathway Commons		MYO18A	CD86	controls-state-change-of	Pathway Commons		HCK	LAT	controls-state-change-of	Pathway Commons		BDNF	INPP5J	catalysis-precedes	Pathway Commons
CD86	FGF1	controls-state-change-of	Pathway Commons		SHC1	IGHV2-5	controls-state-change-of	Pathway Commons		CD86	GNG12	controls-state-change-of	Pathway Commons		TYROBP	GNG2	controls-state-change-of	Pathway Commons		IRAK1	RAC1	controls-state-change-of	Pathway Commons		CNTRL	PLCG2	controls-state-change-of	Pathway Commons		CPSF6	DAPP1	controls-state-change-of	Pathway Commons		PIP4K2B	GNG12	catalysis-precedes	Pathway Commons
CD247	IGHV3-48	controls-state-change-of	Pathway Commons		IGKV3-20	FGFR1	controls-state-change-of	Pathway Commons		MYD88	BRK1	controls-state-change-of	Pathway Commons		EPOR	FYN	controls-state-change-of	Pathway Commons		CLTC	ABI1	controls-state-change-of	Pathway Commons		CBL	PLCG2	controls-state-change-of	Pathway Commons		HLA-E	CD3G	controls-state-change-of	Pathway Commons		CD3G	AKT2	controls-state-change-of	Pathway Commons
PIK3R1	IGLV2-23	controls-state-change-of	Pathway Commons		GNGT2	GAB1	controls-state-change-of	Pathway Commons		EGFR	FGF2	controls-state-change-of	Pathway Commons		PIP4K2A	PIK3R4	catalysis-precedes	Pathway Commons		RHOG	LCP2	controls-state-change-of	Pathway Commons		HCK	LRRFIP1	controls-state-change-of	Pathway Commons		CD86	FGF1	controls-state-change-of	Pathway Commons		PDGFA	CD28	controls-state-change-of	Pathway Commons
IGHV3-33	TXK	controls-state-change-of	Pathway Commons		FCGR1A	GNG7	controls-state-change-of	Pathway Commons		GNG4	BRK1	controls-state-change-of	Pathway Commons		SYK	AKT2	controls-state-change-of	Pathway Commons		IRS2	TFG	controls-state-change-of	Pathway Commons		RAPGEF1	KRAS	controls-state-change-of	Pathway Commons		PLCG2	GNG7	controls-state-change-of	Pathway Commons		TREM2	FGF18	controls-state-change-of	Pathway Commons
IL34	GNG2	controls-state-change-of	Pathway Commons		KDR	WASF2	controls-state-change-of	Pathway Commons		PDGFB	GNB4	controls-state-change-of	Pathway Commons		EML4	PDPK1	controls-state-change-of	Pathway Commons		EML4	SH3KBP1	controls-state-change-of	Pathway Commons		JAK2	GNG7	controls-state-change-of	Pathway Commons		MDK	FGF1	controls-state-change-of	Pathway Commons		ERBB3	MYO18A	controls-state-change-of	Pathway Commons
FGF7	IGLV3-19	controls-state-change-of	Pathway Commons		EPOR	IGHV3-33	controls-state-change-of	Pathway Commons		CSF1	GNB2	controls-state-change-of	Pathway Commons		PIK3CG	GNG10	controls-state-change-of	Pathway Commons		HBEGF	NPM1	controls-state-change-of	Pathway Commons		IRAK4	AKT3	controls-state-change-of	Pathway Commons		PIK3R5	GNG7	controls-state-change-of	Pathway Commons		GNB5	ITK	controls-state-change-of	Pathway Commons
FGF7	IGHM	controls-state-change-of	Pathway Commons		LCK	IGHG2	controls-state-change-of	Pathway Commons		HSP90AA1	BRK1	controls-state-change-of	Pathway Commons		AREG	GNG2	controls-state-change-of	Pathway Commons		HSP90AA1	FCGR2A	controls-state-change-of	Pathway Commons		PIK3R1	LAT2	controls-state-change-of	Pathway Commons		CD3G	BLNK	controls-state-change-of	Pathway Commons		AXL	CD79B	controls-state-change-of	Pathway Commons
CD247	IGKV1-5	controls-state-change-of	Pathway Commons		PIK3AP1	FCGR2A	controls-state-change-of	Pathway Commons		KITLG	CD86	controls-state-change-of	Pathway Commons		B2M	FYN	controls-state-change-of	Pathway Commons		CDC37	GNB1	controls-state-change-of	Pathway Commons		TRIM24	NCK1	controls-state-change-of	Pathway Commons		PDGFB	GNB3	controls-state-change-of	Pathway Commons		TREM2	CYFIP2	controls-state-change-of	Pathway Commons
CD3G	BLNK	controls-state-change-of	Pathway Commons		B2M	GNG2	controls-state-change-of	Pathway Commons		TREM2	INPP5D	catalysis-precedes	Pathway Commons		FRS2	ABI2	controls-state-change-of	Pathway Commons		FCGR2A	LAT2	controls-state-change-of	Pathway Commons		PIK3AP1	PTN	controls-state-change-of	Pathway Commons		RAC2	FCGR2A	controls-state-change-of	Pathway Commons		PDGFA	LCK	controls-state-change-of	Pathway Commons
IGHV3-11	PTN	controls-state-change-of	Pathway Commons		IL33	IGKV1-39	controls-state-change-of	Pathway Commons		CD247	BTK	controls-state-change-of	Pathway Commons		IRS2	LCP2	controls-state-change-of	Pathway Commons		B2M	LAT2	controls-state-change-of	Pathway Commons		CD86	PLCG2	controls-state-change-of	Pathway Commons		PIK3R1	RHOG	in-complex-with	Pathway Commons		CD247	BAIAP2	controls-state-change-of	Pathway Commons
FGFR1	GNG3	controls-state-change-of	Pathway Commons		CD86	FGFR1OP2	controls-state-change-of	Pathway Commons		GNB2	FCGR1A	controls-state-change-of	Pathway Commons		NCAM1	KRAS	controls-state-change-of	Pathway Commons		VEGFA	FGFR1OP2	controls-state-change-of	Pathway Commons		PIK3R5	NCKAP1L	controls-state-change-of	Pathway Commons		IRS2	LCK	controls-state-change-of	Pathway Commons		PIK3R1	FCGR2A	controls-state-change-of	Pathway Commons
IGHV3-30	GNG3	controls-state-change-of	Pathway Commons		IGLV1-51	CNTRL	controls-state-change-of	Pathway Commons		FCGR2A	BLNK	controls-state-change-of	Pathway Commons		CD3G	GNB1	controls-state-change-of	Pathway Commons		GAPDH	MDH1	catalysis-precedes	Pathway Commons		IRAK1	NCK1	controls-state-change-of	Pathway Commons		MYD88	IGKC	controls-state-change-of	Pathway Commons		FGF10	FGF18	controls-state-change-of	Pathway Commons
RAC2	FCGR2A	controls-state-change-of	Pathway Commons		FCGR3A	GNB5	controls-state-change-of	Pathway Commons		CDC5L	SLC11A1	interacts-with	APPIC		ERLIN2	PLCG2	controls-state-change-of	Pathway Commons		FCGR2A	FCGR3A	controls-state-change-of	Pathway Commons		INPPL1	CNTRL	controls-state-change-of	Pathway Commons		RAC1	TEC	controls-state-change-of	Pathway Commons		AREG	GNG2	controls-state-change-of	Pathway Commons
MYD88	IGKC	controls-state-change-of	Pathway Commons		SHC1	CD3G	controls-state-change-of	Pathway Commons		FN1	CD247	controls-state-change-of	Pathway Commons		ACAT2	PDHB	catalysis-precedes	Pathway Commons		HLA-E	ABI1	controls-state-change-of	Pathway Commons		BAG4	MDK	controls-state-change-of	Pathway Commons		PDGFB	CD28	controls-state-change-of	Pathway Commons		TGFA	PTN	controls-state-change-of	Pathway Commons
IGHV3-48	CD86	controls-state-change-of	Pathway Commons		TYROBP	INPP5D	catalysis-precedes	Pathway Commons		PIK3AP1	WASF2	controls-state-change-of	Pathway Commons		PIK3R3	ATIC	controls-state-change-of	Pathway Commons		EML4	BAIAP2	controls-state-change-of	Pathway Commons		FGFR1OP2	ATIC	controls-state-change-of	Pathway Commons		MYD88	BLNK	controls-state-change-of	Pathway Commons		CSF1	GRAP2	controls-state-change-of	Pathway Commons
VEGFA	IGLV3-25	controls-state-change-of	Pathway Commons		SHC1	IGLV3-1	controls-state-change-of	Pathway Commons		CSF1	GNG2	controls-state-change-of	Pathway Commons		KLRK1	GNG10	controls-state-change-of	Pathway Commons		LAT2	ABI1	controls-state-change-of	Pathway Commons		IDH3B	DLD	catalysis-precedes	Pathway Commons		TYROBP	INPP5K	catalysis-precedes	Pathway Commons		KITLG	GRAP2	controls-state-change-of	Pathway Commons
MYD88	GNG4	controls-state-change-of	Pathway Commons		CNTRL	IGHG4	controls-state-change-of	Pathway Commons		INPP5D	VAV3	controls-state-change-of	Pathway Commons		DCTN1	LCP2	controls-state-change-of	Pathway Commons		B2M	ABI1	controls-state-change-of	Pathway Commons		LRRFIP1	NCKAP1	controls-state-change-of	Pathway Commons		IGHG3	LAT	controls-state-change-of	Pathway Commons		GNG11	AKT2	controls-state-change-of	Pathway Commons
MYD88	BLNK	controls-state-change-of	Pathway Commons		IGLV2-11	TXK	controls-state-change-of	Pathway Commons		HLA-E	FGF20	controls-state-change-of	Pathway Commons		PIP4K2A	RAC2	catalysis-precedes	Pathway Commons		LAT2	NPM1	controls-state-change-of	Pathway Commons		GNB1	BAG4	controls-state-change-of	Pathway Commons		CD86	NCK1	controls-state-change-of	Pathway Commons		FGFR4	FGFR2	controls-state-change-of	Pathway Commons
IGHG3	LAT	controls-state-change-of	Pathway Commons		STAT1	IGKV4-1	controls-state-change-of	Pathway Commons		BCR	LCK	controls-state-change-of	Pathway Commons		KLRD1	FYN	controls-state-change-of	Pathway Commons		GRB2	FCGR3A	controls-state-change-of	Pathway Commons		MDK	TRIM24	controls-state-change-of	Pathway Commons		TYROBP	ABI1	controls-state-change-of	Pathway Commons		TRAT1	PLCG1	controls-state-change-of	Pathway Commons
IGKV2D-28	GNG4	controls-state-change-of	Pathway Commons		FGFR1OP2	CD247	controls-state-change-of	Pathway Commons		CSF1	INPP5D	catalysis-precedes	Pathway Commons		CD247	GNG2	controls-state-change-of	Pathway Commons		IRS2	CPSF6	controls-state-change-of	Pathway Commons		DVL2	KLRK1	catalysis-precedes	Pathway Commons		FLT3LG	CPSF6	controls-state-change-of	Pathway Commons		TREM2	MDK	controls-state-change-of	Pathway Commons
PDGFRB	FCGR2A	controls-state-change-of	Pathway Commons		RHOG	IGHV4-34	controls-state-change-of	Pathway Commons		VEGFA	TRIM24	controls-state-change-of	Pathway Commons		GNG7	NCK1	controls-state-change-of	Pathway Commons		IRAK1	CD86	controls-state-change-of	Pathway Commons		INPP5D	NCK1	controls-state-change-of	Pathway Commons		PDGFRB	FCGR2A	controls-state-change-of	Pathway Commons		FGF18	BAIAP2	controls-state-change-of	Pathway Commons
VAV1	IGKV1-33	controls-state-change-of	Pathway Commons		IGHV4-59	INPP5K	catalysis-precedes	Pathway Commons		EGF	SYK	controls-state-change-of	Pathway Commons		EML4	LAT	controls-state-change-of	Pathway Commons		GRB2	GNB1	controls-state-change-of	Pathway Commons		PIK3AP1	PLCG2	controls-state-change-of	Pathway Commons		PIP4K2A	FGF1	catalysis-precedes	Pathway Commons		THOC5	FCGR3A	controls-state-change-of	Pathway Commons
IGKV1-33	BTK	controls-state-change-of	Pathway Commons		ALKAL2	GNB5	controls-state-change-of	Pathway Commons		PIK3R4	VAV3	controls-state-change-of	Pathway Commons		PIK3CG	CNTRL	controls-state-change-of	Pathway Commons		IL1RAP	ZMYM2	controls-state-change-of	Pathway Commons		STAT1	CD247	controls-state-change-of	Pathway Commons		IGKC	ZMYM2	controls-state-change-of	Pathway Commons		KLRK1	PLCG1	controls-state-change-of	Pathway Commons
IL1RL1	IGLC2	controls-state-change-of	Pathway Commons		PIK3R5	IGHV3-7	controls-state-change-of	Pathway Commons		HBEGF	BCR	controls-state-change-of	Pathway Commons		PIK3AP1	ITK	controls-state-change-of	Pathway Commons		GNB2	CPSF6	controls-state-change-of	Pathway Commons		IGKC	CYFIP2	controls-state-change-of	Pathway Commons		GRAP2	SHC1	controls-state-change-of	Pathway Commons		TGFA	CD247	controls-state-change-of	Pathway Commons
GRAP2	IGKV3-20	controls-state-change-of	Pathway Commons		TRAT1	IGLC2	controls-state-change-of	Pathway Commons		GNB2	FGFR3	controls-state-change-of	Pathway Commons		GRAP2	ATIC	controls-state-change-of	Pathway Commons		GNB2	WASF2	controls-state-change-of	Pathway Commons		BAG4	IGKC	controls-state-change-of	Pathway Commons		NTRK3	GNG7	controls-state-change-of	Pathway Commons		CD247	GNG2	controls-state-change-of	Pathway Commons
KLRK1	IGKV2-28	controls-state-change-of	Pathway Commons		GNB4	CD247	controls-state-change-of	Pathway Commons		GNG4	BCR	controls-state-change-of	Pathway Commons		EML4	CYFIP2	controls-state-change-of	Pathway Commons		NPM1	GNB2	controls-state-change-of	Pathway Commons		FGFR1	INPPL1	catalysis-precedes	Pathway Commons		VAV1	SHC1	controls-state-change-of	Pathway Commons		IRS1	CD79B	controls-state-change-of	Pathway Commons
TRAT1	IGHV3-7	controls-state-change-of	Pathway Commons		IGKV3-20	CD28	controls-state-change-of	Pathway Commons		MET	TRIM24	controls-state-change-of	Pathway Commons		TRAF6	GNG7	controls-state-change-of	Pathway Commons		HSP90AA1	SH3KBP1	controls-state-change-of	Pathway Commons		PTN	INPPL1	catalysis-precedes	Pathway Commons		PIK3CB	GNB5	controls-state-change-of	Pathway Commons		FGF9	INPP5J	catalysis-precedes	Pathway Commons
LCK	FCGR1A	controls-state-change-of	Pathway Commons		STAT1	IGHV4-59	controls-state-change-of	Pathway Commons		EREG	SYK	controls-state-change-of	Pathway Commons		FLT3	ITK	controls-state-change-of	Pathway Commons		FGFR1OP2	NCKAP1L	controls-state-change-of	Pathway Commons		THOC5	VAV1	controls-state-change-of	Pathway Commons		IGHG3	FGF20	controls-state-change-of	Pathway Commons		FGF18	CD247	controls-state-change-of	Pathway Commons
IGLC3	FGFR4	controls-state-change-of	Pathway Commons		KLB	IGLV3-25	controls-state-change-of	Pathway Commons		PIK3AP1	GNB4	controls-state-change-of	Pathway Commons		AREG	AKT2	controls-state-change-of	Pathway Commons		LYN	NRAS	controls-state-change-of	Pathway Commons		IL33	BAG4	controls-state-change-of	Pathway Commons		FGF1	INPP5K	catalysis-precedes	Pathway Commons		AREG	AKT2	controls-state-change-of	Pathway Commons
IGHV2-5	PLCG2	controls-state-change-of	Pathway Commons		CD28	IGHV4-34	controls-state-change-of	Pathway Commons		CSF1R	BAIAP2	controls-state-change-of	Pathway Commons		ACAT2	CS	catalysis-precedes	Pathway Commons		CD86	CPSF6	controls-state-change-of	Pathway Commons		IRAK4	BTK	controls-state-change-of	Pathway Commons		LCK	FCGR1A	controls-state-change-of	Pathway Commons		IRS1	CD79A	controls-state-change-of	Pathway Commons
KLRK1	CD28	controls-state-change-of	Pathway Commons		TRAT1	CNTRL	controls-state-change-of	Pathway Commons		FGFR3	SYK	controls-state-change-of	Pathway Commons		EPOR	TRIM24	controls-state-change-of	Pathway Commons		CLTC	CUX1	controls-state-change-of	Pathway Commons		BAG4	NCKAP1L	controls-state-change-of	Pathway Commons		MDK	GNG2	controls-state-change-of	Pathway Commons		FGFR2	CD79A	controls-state-change-of	Pathway Commons
AREG	IGKV2-28	controls-state-change-of	Pathway Commons		GNG8	IGLC2	controls-state-change-of	Pathway Commons		NTRK2	BCR	controls-state-change-of	Pathway Commons		GAB3	TXK	controls-state-change-of	Pathway Commons		HSP90AA1	LCP2	controls-state-change-of	Pathway Commons		PIK3R5	BAG4	controls-state-change-of	Pathway Commons		UBE2S	ANAPC4	in-complex-with	Pathway Commons		GNG12	PTN	controls-state-change-of	Pathway Commons
CD86	LAT2	controls-state-change-of	Pathway Commons		LYN	IGHV4-59	controls-state-change-of	Pathway Commons		FGF20	GNB2	controls-state-change-of	Pathway Commons		GNG2	FCGR3A	controls-state-change-of	Pathway Commons		LAT2	WASF2	controls-state-change-of	Pathway Commons		CLIP1	MAPK3	controls-phosphorylation-of	Pathway Commons		CD86	LAT2	controls-state-change-of	Pathway Commons		GNG2	FCGR3A	controls-state-change-of	Pathway Commons
EPGN	LCK	controls-state-change-of	Pathway Commons		GNG8	IGHV3-30	controls-state-change-of	Pathway Commons		CD86	GNB4	controls-state-change-of	Pathway Commons		PIK3R1	MDM2	controls-state-change-of	Pathway Commons		LYN	KRAS	controls-state-change-of	Pathway Commons		MYO18A	INPP5D	catalysis-precedes	Pathway Commons		RHOG	IGKC	controls-state-change-of	Pathway Commons		GNG12	INPP5J	catalysis-precedes	Pathway Commons
IGHV1-69	GNG4	controls-state-change-of	Pathway Commons		EPOR	IGHG3	controls-state-change-of	Pathway Commons		IRAK1	CYFIP1	controls-state-change-of	Pathway Commons		GNG7	VAV3	controls-state-change-of	Pathway Commons		NPM1	CUX1	controls-state-change-of	Pathway Commons		VAV1	LAT	controls-state-change-of	Pathway Commons		LAT2	RAC1	controls-state-change-of	Pathway Commons		KLRD1	FGF7	controls-state-change-of	Pathway Commons
HGF	IGLC7	controls-state-change-of	Pathway Commons		CD28	INPP5K	catalysis-precedes	Pathway Commons		STAT1	LAT2	controls-state-change-of	Pathway Commons		HLA-E	GNB1	controls-state-change-of	Pathway Commons		CD86	NPM1	controls-state-change-of	Pathway Commons		FGFR1OP2	CYFIP2	controls-state-change-of	Pathway Commons		LYN	GNG2	controls-state-change-of	Pathway Commons		PIK3R1	BAIAP2	controls-state-change-of	Pathway Commons
GNG4	FGFR1	controls-state-change-of	Pathway Commons		GNB5	IGHV3-30	controls-state-change-of	Pathway Commons		FGF20	FCGR1A	controls-state-change-of	Pathway Commons		DCTN1	TXK	controls-state-change-of	Pathway Commons		RAC1	GNG5	controls-state-change-of	Pathway Commons		IRAK4	ATIC	controls-state-change-of	Pathway Commons		SH2D2A	GNG2	controls-state-change-of	Pathway Commons		MYO18A	CD79A	controls-state-change-of	Pathway Commons
CD3G	PLCG2	controls-state-change-of	Pathway Commons		CD28	FCGR1A	controls-state-change-of	Pathway Commons		PIP5K1B	AXL	catalysis-precedes	Pathway Commons		STAT1	ERLIN2	controls-state-change-of	Pathway Commons		PIP4K2A	CPSF6	catalysis-precedes	Pathway Commons		PTN	FCGR2A	controls-state-change-of	Pathway Commons		LAT2	CNTRL	controls-state-change-of	Pathway Commons		KITLG	BAIAP2	controls-state-change-of	Pathway Commons
CD80	IGKV1-33	controls-state-change-of	Pathway Commons		IL33	IGLV1-51	controls-state-change-of	Pathway Commons		PIK3AP1	BCR	controls-state-change-of	Pathway Commons		SH2D2A	GNB1	controls-state-change-of	Pathway Commons		CDC37	TFG	controls-state-change-of	Pathway Commons		STAT3	BTK	controls-state-change-of	Pathway Commons		CD3G	PLCG2	controls-state-change-of	Pathway Commons		KLRC2	CD247	controls-state-change-of	Pathway Commons
IL33	CD79B	controls-state-change-of	Pathway Commons		IGLV3-1	LCK	controls-state-change-of	Pathway Commons		EREG	BLNK	controls-state-change-of	Pathway Commons		GNG7	SYK	controls-state-change-of	Pathway Commons		KIF5B	FGFR1OP2	controls-state-change-of	Pathway Commons		IL33	LRRFIP1	controls-state-change-of	Pathway Commons		GNG10	AKT3	controls-state-change-of	Pathway Commons		HGF	FGF2	controls-state-change-of	Pathway Commons
FYN	IGKV1D-39	controls-state-change-of	Pathway Commons		GRAP2	IGKV1-12	controls-state-change-of	Pathway Commons		FGF20	BRK1	controls-state-change-of	Pathway Commons		FCGR3A	TFG	controls-state-change-of	Pathway Commons		LRRFIP1	RHOA	controls-state-change-of	Pathway Commons		STAT1	AKT2	controls-state-change-of	Pathway Commons		HCK	ABI1	controls-state-change-of	Pathway Commons		IRS1	FGF18	controls-state-change-of	Pathway Commons
FLT3	LCK	controls-state-change-of	Pathway Commons		KLRD1	WASF2	controls-state-change-of	Pathway Commons		EREG	BTK	controls-state-change-of	Pathway Commons		IL1RAP	PDPK1	controls-state-change-of	Pathway Commons		AREG	CPSF6	controls-state-change-of	Pathway Commons		PIP5K1B	FLT3LG	catalysis-precedes	Pathway Commons		HLA-E	GRAP2	controls-state-change-of	Pathway Commons		IRS1	FGFR4	controls-state-change-of	Pathway Commons
FGFR4	IGHV1-69	controls-state-change-of	Pathway Commons		CD247	IGHM	controls-state-change-of	Pathway Commons		GNB4	CD86	controls-state-change-of	Pathway Commons		PIK3CA	TFG	controls-state-change-of	Pathway Commons		ZMYM2	CD86	controls-state-change-of	Pathway Commons		TREM2	CD3G	controls-state-change-of	Pathway Commons		FGF1	PLCG2	controls-state-change-of	Pathway Commons		FGF18	GNG11	controls-state-change-of	Pathway Commons
IGKV1D-39	TXK	controls-state-change-of	Pathway Commons		FN1	GNG11	controls-state-change-of	Pathway Commons		HBEGF	GNG2	controls-state-change-of	Pathway Commons		GNB5	SYK	controls-state-change-of	Pathway Commons		FCGR2A	RAC1	controls-state-change-of	Pathway Commons		STAT1	CD3G	controls-state-change-of	Pathway Commons		CPSF6	IGHG3	controls-state-change-of	Pathway Commons		CSF1	LAT	controls-state-change-of	Pathway Commons
IGLV1-51	CD28	controls-state-change-of	Pathway Commons		GNG11	IGKV3-11	controls-state-change-of	Pathway Commons		SYK	FGFR3	controls-state-change-of	Pathway Commons		PLCG2	ZMYM2	controls-state-change-of	Pathway Commons		IRAK1	CPSF6	controls-state-change-of	Pathway Commons		SHC1	PTN	controls-state-change-of	Pathway Commons		IGHG4	IGKC	controls-state-change-of	Pathway Commons		GRAP2	BAIAP2	controls-state-change-of	Pathway Commons
IL1RL1	IGKV3-15	controls-state-change-of	Pathway Commons		IGKV1-12	FGFR1	controls-state-change-of	Pathway Commons		IRAK1	BCR	controls-state-change-of	Pathway Commons		PIK3R3	GNB1	controls-state-change-of	Pathway Commons		KIF5B	GNB1	controls-state-change-of	Pathway Commons		VEGFA	MDK	controls-state-change-of	Pathway Commons		GNB3	ZMYM2	controls-state-change-of	Pathway Commons		CD247	INPP5J	catalysis-precedes	Pathway Commons
IL33	CD247	controls-state-change-of	Pathway Commons		CNTRL	IGHD	controls-state-change-of	Pathway Commons		GNB5	INPP5D	catalysis-precedes	Pathway Commons		GAB3	CYFIP2	controls-state-change-of	Pathway Commons		CUX1	GNG5	controls-state-change-of	Pathway Commons		AXL	FCGR3A	controls-state-change-of	Pathway Commons		FCGR3A	GNB3	controls-state-change-of	Pathway Commons		MDK	FGF10	controls-state-change-of	Pathway Commons
IGLC7	GNG3	controls-state-change-of	Pathway Commons		KLRD1	IGKV4-1	controls-state-change-of	Pathway Commons		HCK	GNB2	controls-state-change-of	Pathway Commons		ZMYM2	SH3KBP1	controls-state-change-of	Pathway Commons		RHOG	CPSF6	controls-state-change-of	Pathway Commons		INPP5D	PTN	controls-state-change-of	Pathway Commons		PIP4K2A	ESR1	catalysis-precedes	Pathway Commons		BTC	GNG11	controls-state-change-of	Pathway Commons
IGHV4-34	LAT2	controls-state-change-of	Pathway Commons		CD28	IGHD	controls-state-change-of	Pathway Commons		PLCG2	INPP5D	catalysis-precedes	Pathway Commons		MYD88	TRIM24	controls-state-change-of	Pathway Commons		PIP4K2A	TYROBP	catalysis-precedes	Pathway Commons		JAK2	INPPL1	catalysis-precedes	Pathway Commons		STAT1	CD28	controls-state-change-of	Pathway Commons		SOS1	GNB5	controls-state-change-of	Pathway Commons
IGLV3-19	CD28	controls-state-change-of	Pathway Commons		TYROBP	IGKV1-12	controls-state-change-of	Pathway Commons		EGF	VAV2	controls-state-change-of	Pathway Commons		JAK2	LAT	controls-state-change-of	Pathway Commons		STAT3	NCKAP1L	controls-state-change-of	Pathway Commons		SYK	FYN	controls-state-change-of	Pathway Commons		GNG7	CD86	controls-state-change-of	Pathway Commons		PIK3R3	FGFR4	controls-state-change-of	Pathway Commons
FGF1	PLCG2	controls-state-change-of	Pathway Commons		FLT3LG	MDK	controls-state-change-of	Pathway Commons		PDGFB	FGF20	controls-state-change-of	Pathway Commons		CD28	SHC1	controls-state-change-of	Pathway Commons		HBEGF	FCGR3A	controls-state-change-of	Pathway Commons		SHC1	GNB1	controls-state-change-of	Pathway Commons		GNB3	SYK	controls-state-change-of	Pathway Commons		FGF9	CD3G	controls-state-change-of	Pathway Commons
GNG4	IGHG4	controls-state-change-of	Pathway Commons		IGLV3-25	LCK	controls-state-change-of	Pathway Commons		LCK	FGF20	controls-state-change-of	Pathway Commons		CLTC	ITK	controls-state-change-of	Pathway Commons		IL1RAP	NPM1	controls-state-change-of	Pathway Commons		HBEGF	LAT	controls-state-change-of	Pathway Commons		IGKC	TXK	controls-state-change-of	Pathway Commons		PIK3CG	BAIAP2	controls-state-change-of	Pathway Commons
GAB3	IGHV1-2	controls-state-change-of	Pathway Commons		CD80	IGLC2	controls-state-change-of	Pathway Commons		GRIN2D	KRAS	controls-state-change-of	Pathway Commons		TRIP11	NRAS	controls-state-change-of	Pathway Commons		STAT1	GNB1	controls-state-change-of	Pathway Commons		CSF1R	TRIM24	controls-state-change-of	Pathway Commons		HBEGF	CYFIP2	controls-state-change-of	Pathway Commons		FGF9	CD247	controls-state-change-of	Pathway Commons
IGHG4	IGKC	controls-state-change-of	Pathway Commons		PIP4K2A	PIK3AP1	catalysis-precedes	Pathway Commons		GAB3	LAT2	controls-state-change-of	Pathway Commons		STAT1	NCK1	controls-state-change-of	Pathway Commons		SDHC	NDUFA1	catalysis-precedes	Pathway Commons		MDK	SH3KBP1	controls-state-change-of	Pathway Commons		PIK3R3	FCGR3A	controls-state-change-of	Pathway Commons		IRS1	INPP5J	catalysis-precedes	Pathway Commons
IGHV2-5	PTN	controls-state-change-of	Pathway Commons		EREG	GNG2	controls-state-change-of	Pathway Commons		HSP90AA1	LAT2	controls-state-change-of	Pathway Commons		CBL	GNG7	controls-state-change-of	Pathway Commons		TYROBP	BAIAP2	controls-state-change-of	Pathway Commons		THOC5	BAG4	controls-state-change-of	Pathway Commons		GNG7	RAC1	controls-state-change-of	Pathway Commons		PIP4K2B	EREG	catalysis-precedes	Pathway Commons
VEGFA	IGHV3-9	controls-state-change-of	Pathway Commons		IL33	NCKAP1L	controls-state-change-of	Pathway Commons		GNB4	CYFIP1	controls-state-change-of	Pathway Commons		CD28	TRIM24	controls-state-change-of	Pathway Commons		RHOG	ZMYM2	controls-state-change-of	Pathway Commons		PIP5K1A	ERBB3	catalysis-precedes	Pathway Commons		IRS2	PLCG2	controls-state-change-of	Pathway Commons		GNG12	CD79A	controls-state-change-of	Pathway Commons
FYN	IGHG1	controls-state-change-of	Pathway Commons		TRAT1	IGHD	controls-state-change-of	Pathway Commons		EREG	VAV3	controls-state-change-of	Pathway Commons		FYN	GNG10	controls-state-change-of	Pathway Commons		KIF5B	NPM1	controls-state-change-of	Pathway Commons		PIP5K1A	FYN	catalysis-precedes	Pathway Commons		FN1	PTN	controls-state-change-of	Pathway Commons		PIP4K2B	TREM2	catalysis-precedes	Pathway Commons
IGKC	TXK	controls-state-change-of	Pathway Commons		GNG10	CD80	controls-state-change-of	Pathway Commons		LCK	WASF2	controls-state-change-of	Pathway Commons		TYROBP	AKT2	controls-state-change-of	Pathway Commons		ZMYM2	TFG	controls-state-change-of	Pathway Commons		PLCG2	BAG4	controls-state-change-of	Pathway Commons		NTRK3	BTK	controls-state-change-of	Pathway Commons		TRAT1	FGF2	controls-state-change-of	Pathway Commons
IGHG4	CD80	controls-state-change-of	Pathway Commons		CSF1R	ABI1	controls-state-change-of	Pathway Commons		EGFR	GNB2	controls-state-change-of	Pathway Commons		ERLIN2	CYFIP2	controls-state-change-of	Pathway Commons		MYD88	ABI1	controls-state-change-of	Pathway Commons		INPPL1	FGFR1	controls-state-change-of	Pathway Commons		INPP5D	CYFIP2	controls-state-change-of	Pathway Commons		GNG12	SOS1	controls-state-change-of	Pathway Commons
KLRD1	CD80	controls-state-change-of	Pathway Commons		FGFR1	IGLC6	controls-state-change-of	Pathway Commons		EGF	FCGR2A	controls-state-change-of	Pathway Commons		SOS1	GNB5	controls-state-change-of	Pathway Commons		LYN	CD86	controls-state-change-of	Pathway Commons		SOS1	ATIC	controls-state-change-of	Pathway Commons		AGO4	MOV10	in-complex-with	Pathway Commons		CD247	SOS1	controls-state-change-of	Pathway Commons
FN1	PTN	controls-state-change-of	Pathway Commons		GNB5	IGLV3-1	controls-state-change-of	Pathway Commons		GAB3	FCGR1A	controls-state-change-of	Pathway Commons		GAB3	ZMYM2	controls-state-change-of	Pathway Commons		MYD88	SH3KBP1	controls-state-change-of	Pathway Commons		VEGFA	CPSF6	controls-state-change-of	Pathway Commons		PLCG2	IGHG2	controls-state-change-of	Pathway Commons		MYO18A	FGFR4	controls-state-change-of	Pathway Commons
KLRK1	IGHM	controls-state-change-of	Pathway Commons		GAB3	FCGR2A	controls-state-change-of	Pathway Commons		GAB3	CD247	controls-state-change-of	Pathway Commons		CD28	LCP2	controls-state-change-of	Pathway Commons		FCGR2A	LCP2	controls-state-change-of	Pathway Commons		TRIM24	FCGR3A	controls-state-change-of	Pathway Commons		STAT1	PTN	controls-state-change-of	Pathway Commons		HCK	MYO18A	controls-state-change-of	Pathway Commons
HGF	GNG4	controls-state-change-of	Pathway Commons		MDK	CYFIP2	controls-state-change-of	Pathway Commons		ERBB2	LCK	controls-state-change-of	Pathway Commons		JAK2	SYK	controls-state-change-of	Pathway Commons		HSP90AA1	RHOA	controls-state-change-of	Pathway Commons		KLRK1	MDK	controls-state-change-of	Pathway Commons		FGF20	GNG7	controls-state-change-of	Pathway Commons		CSF1	CD79A	controls-state-change-of	Pathway Commons
PLCG2	IGHG2	controls-state-change-of	Pathway Commons		PIK3C3	FCGR1A	controls-state-change-of	Pathway Commons		CSF1R	SYK	controls-state-change-of	Pathway Commons		EML4	PLCG2	controls-state-change-of	Pathway Commons		CUX1	WASF2	controls-state-change-of	Pathway Commons		MYO18A	FGFR1	controls-state-change-of	Pathway Commons		SH2D2A	GRB2	controls-state-change-of	Pathway Commons		SDS	PC	catalysis-precedes	Pathway Commons
LCK	IGHV4-34	controls-state-change-of	Pathway Commons		MDK	IGLC3	controls-state-change-of	Pathway Commons		HSP90AA1	KRAS	controls-state-change-of	Pathway Commons		IL1RAP	LAT	controls-state-change-of	Pathway Commons		GNB2	RHOA	controls-state-change-of	Pathway Commons		CSF1R	PLCG1	controls-state-change-of	Pathway Commons		PDGFA	AKT3	controls-state-change-of	Pathway Commons		KITLG	PLCG1	controls-state-change-of	Pathway Commons
EPOR	IGLV3-19	controls-state-change-of	Pathway Commons		MYO18A	GNB4	controls-state-change-of	Pathway Commons		PIK3R4	BCR	controls-state-change-of	Pathway Commons		CDC37	RAC1	controls-state-change-of	Pathway Commons		MYD88	WASF2	controls-state-change-of	Pathway Commons		PLCG2	TRIM24	controls-state-change-of	Pathway Commons		PIP4K2A	FGF7	catalysis-precedes	Pathway Commons		PIP4K2B	PDGFA	catalysis-precedes	Pathway Commons
FGF1	IGKV4-1	controls-state-change-of	Pathway Commons		SHC1	DAPP1	controls-state-change-of	Pathway Commons		GNB5	VAV3	controls-state-change-of	Pathway Commons		FLT3	FYN	controls-state-change-of	Pathway Commons		IRS2	RHOA	controls-state-change-of	Pathway Commons		AXL	GAB2	controls-state-change-of	Pathway Commons		IRS1	GNB4	controls-state-change-of	Pathway Commons		GNB5	TEC	controls-state-change-of	Pathway Commons
IGKV3-20	TXK	controls-state-change-of	Pathway Commons		GNGT2	IGKV1-5	controls-state-change-of	Pathway Commons		ERBB2	FCGR1A	controls-state-change-of	Pathway Commons		PIP4K2B	EREG	catalysis-precedes	Pathway Commons		FCGR3A	CD86	controls-state-change-of	Pathway Commons		AXL	CD247	controls-state-change-of	Pathway Commons		PIK3R1	GNG7	controls-state-change-of	Pathway Commons		FN1	CD28	controls-state-change-of	Pathway Commons
IGLC3	TXK	controls-state-change-of	Pathway Commons		IGLV3-25	LCP2	controls-state-change-of	Pathway Commons		HSP90AA1	VAV3	controls-state-change-of	Pathway Commons		PIK3CG	ZMYM2	controls-state-change-of	Pathway Commons		LAT2	LCP2	controls-state-change-of	Pathway Commons		GNB1	LCP2	controls-state-change-of	Pathway Commons		JAK2	TXK	controls-state-change-of	Pathway Commons		AREG	TEC	controls-state-change-of	Pathway Commons
ESR1	IGHV1-2	controls-state-change-of	Pathway Commons		GNG2	DAPP1	controls-state-change-of	Pathway Commons		PIK3R4	TRIM24	controls-state-change-of	Pathway Commons		GNB1	ZMYM2	controls-state-change-of	Pathway Commons		PIK3AP1	LCP2	controls-state-change-of	Pathway Commons		CD86	SH3KBP1	controls-state-change-of	Pathway Commons		LYN	CNTRL	controls-state-change-of	Pathway Commons		CSF1	BAIAP2	controls-state-change-of	Pathway Commons
TREM2	IGKV3-11	controls-state-change-of	Pathway Commons		CD19	IGKC	controls-state-change-of	Pathway Commons		JAK2	GNG12	controls-state-change-of	Pathway Commons		GAB3	GNG7	controls-state-change-of	Pathway Commons		UBE2E1	ANAPC15	in-complex-with	Pathway Commons		PIP5K1A	PLCG2	catalysis-precedes	Pathway Commons		AREG	INPP5K	catalysis-precedes	Pathway Commons		FGFR2	FGFR4	controls-state-change-of	Pathway Commons
IL1RL1	FYN	controls-state-change-of	Pathway Commons		AREG	KLB	controls-state-change-of	Pathway Commons		PIK3R4	GNB2	controls-state-change-of	Pathway Commons		STRN	PLCG2	controls-state-change-of	Pathway Commons		PIP4K2A	HLA-E	catalysis-precedes	Pathway Commons		PIK3R5	CYFIP2	controls-state-change-of	Pathway Commons		PIK3CD	CPSF6	controls-state-change-of	Pathway Commons		PIK3CD	CD79B	controls-state-change-of	Pathway Commons
ESR1	IGKV1-5	controls-state-change-of	Pathway Commons		IGLV6-57	ALKAL2	controls-state-change-of	Pathway Commons		PIK3AP1	VAV3	controls-state-change-of	Pathway Commons		CD247	SOS1	controls-state-change-of	Pathway Commons		IL1RAP	TFG	controls-state-change-of	Pathway Commons		DCTN1	FGFR1	controls-state-change-of	Pathway Commons		IRS1	CNTRL	controls-state-change-of	Pathway Commons		CSF1R	CD247	controls-state-change-of	Pathway Commons
CD247	FGFR4	controls-state-change-of	Pathway Commons		GNG11	CD28	controls-state-change-of	Pathway Commons		GNB2	TRIM24	controls-state-change-of	Pathway Commons		SHC1	PLCG2	controls-state-change-of	Pathway Commons		GNB2	BRK1	controls-state-change-of	Pathway Commons		LYN	SH3KBP1	controls-state-change-of	Pathway Commons		IGHG3	GNB3	controls-state-change-of	Pathway Commons		PIK3CG	MDK	controls-state-change-of	Pathway Commons
EPGN	IGLV3-19	controls-state-change-of	Pathway Commons		GNG8	INPP5D	catalysis-precedes	Pathway Commons		LYN	GNB4	controls-state-change-of	Pathway Commons		B2M	GNB1	controls-state-change-of	Pathway Commons		ACO2	IDH3G	catalysis-precedes	Pathway Commons		PIK3AP1	LAT	controls-state-change-of	Pathway Commons		GNB3	CYFIP2	controls-state-change-of	Pathway Commons		TREM2	GNB5	controls-state-change-of	Pathway Commons
FN1	LCK	controls-state-change-of	Pathway Commons		PIK3CG	LCK	controls-state-change-of	Pathway Commons		CD247	BLNK	controls-state-change-of	Pathway Commons		ERLIN2	FYN	controls-state-change-of	Pathway Commons		NPM1	FGFR1OP2	controls-state-change-of	Pathway Commons		DVL2	SOS1	catalysis-precedes	Pathway Commons		GRB2	CYFIP2	controls-state-change-of	Pathway Commons		PIP4K2B	HBEGF	catalysis-precedes	Pathway Commons
FYN	IGHG3	controls-state-change-of	Pathway Commons		IRS2	GNG10	controls-state-change-of	Pathway Commons		MYD88	PLCG2	controls-state-change-of	Pathway Commons		PIK3CG	SH3KBP1	controls-state-change-of	Pathway Commons		RHOG	RHOA	controls-state-change-of	Pathway Commons		EREG	NCK1	controls-state-change-of	Pathway Commons		GNGT2	NCK1	controls-state-change-of	Pathway Commons		CD19	GNB5	controls-state-change-of	Pathway Commons
VEGFA	IGKV1-5	controls-state-change-of	Pathway Commons		PIK3R2	CD3G	controls-state-change-of	Pathway Commons		VEGFA	LAT2	controls-state-change-of	Pathway Commons		GNB5	FYN	controls-state-change-of	Pathway Commons		HCK	LAT2	controls-state-change-of	Pathway Commons		TRIM24	FYN	controls-state-change-of	Pathway Commons		FN1	LCK	controls-state-change-of	Pathway Commons		FGF9	CD28	controls-state-change-of	Pathway Commons
KLRC2	CD79B	controls-state-change-of	Pathway Commons		CD80	IGKV4-1	controls-state-change-of	Pathway Commons		AXL	INPP5D	catalysis-precedes	Pathway Commons		FLT3LG	PLCG2	controls-state-change-of	Pathway Commons		HBEGF	TFG	controls-state-change-of	Pathway Commons		PIK3AP1	GRB2	controls-state-change-of	Pathway Commons		FGF20	TXK	controls-state-change-of	Pathway Commons		IL33	FGF10	controls-state-change-of	Pathway Commons
FGF1	IGHG2	controls-state-change-of	Pathway Commons		PDGFB	LAT	controls-state-change-of	Pathway Commons		SUCLG1	PDHB	catalysis-precedes	Pathway Commons		CDC37	TRIM24	controls-state-change-of	Pathway Commons		LAT2	SH3KBP1	controls-state-change-of	Pathway Commons		IRAK1	TRIM24	controls-state-change-of	Pathway Commons		TRAF6	CPSF6	controls-state-change-of	Pathway Commons		PIK3R1	TGFA	in-complex-with	Pathway Commons
GNG2	IGKV2-30	controls-state-change-of	Pathway Commons		MDK	INPP5D	catalysis-precedes	Pathway Commons		FN1	SYK	controls-state-change-of	Pathway Commons		RAC2	SH3KBP1	controls-state-change-of	Pathway Commons		HCK	WASF2	controls-state-change-of	Pathway Commons		EREG	CPSF6	controls-state-change-of	Pathway Commons		FGF1	IGHG2	controls-state-change-of	Pathway Commons		MYO18A	ITK	controls-state-change-of	Pathway Commons
TYROBP	IGHV4-59	controls-state-change-of	Pathway Commons		RHOG	IGLV1-51	controls-state-change-of	Pathway Commons		FGF2	PLCG2	controls-state-change-of	Pathway Commons		CDC37	ITK	controls-state-change-of	Pathway Commons		HLA-E	GNB2	controls-state-change-of	Pathway Commons		FGFR1	NCKAP1	controls-state-change-of	Pathway Commons		FLT3LG	FGF20	controls-state-change-of	Pathway Commons		ERBB3	GNG2	controls-state-change-of	Pathway Commons
GNG4	ITK	controls-state-change-of	Pathway Commons		IGHG3	CD79A	controls-state-change-of	Pathway Commons		MYD88	VAV3	controls-state-change-of	Pathway Commons		CNTRL	SYK	controls-state-change-of	Pathway Commons		SDHB	SUCLG1	catalysis-precedes	Pathway Commons		AXL	PLCG2	controls-state-change-of	Pathway Commons		GNG7	BLNK	controls-state-change-of	Pathway Commons		IRS2	MYO18A	controls-state-change-of	Pathway Commons
FGFR4	IGHV3-9	controls-state-change-of	Pathway Commons		CD86	FCGR2A	controls-state-change-of	Pathway Commons		GNG2	BAIAP2	controls-state-change-of	Pathway Commons		IL1RAP	RAC1	controls-state-change-of	Pathway Commons		CSF1R	WASF2	controls-state-change-of	Pathway Commons		CBL	MDK	controls-state-change-of	Pathway Commons		INPP5D	FCGR2A	controls-state-change-of	Pathway Commons		INPP5D	AKT2	controls-state-change-of	Pathway Commons
IGLC1	PLCG2	controls-state-change-of	Pathway Commons		CNTRL	FCGR1A	controls-state-change-of	Pathway Commons		INPP5D	LCK	controls-state-change-of	Pathway Commons		PIK3R4	ZMYM2	controls-state-change-of	Pathway Commons		CDC37	HSP90AA1	in-complex-with	Pathway Commons		HSP90AA1	LAT	controls-state-change-of	Pathway Commons		PIK3R3	VAV3	controls-state-change-of	Pathway Commons		SOS1	MYO18A	controls-state-change-of	Pathway Commons
IGHG4	GNG3	controls-state-change-of	Pathway Commons		CD19	CD28	controls-state-change-of	Pathway Commons		IRAK1	LCP2	controls-state-change-of	Pathway Commons		PLCG2	TFG	controls-state-change-of	Pathway Commons		CLTC	GRB2	controls-state-change-of	Pathway Commons		HLA-E	SOS1	controls-state-change-of	Pathway Commons		FGF7	FGF20	controls-state-change-of	Pathway Commons		HCK	FGFR2	controls-state-change-of	Pathway Commons
KLRD1	IGHV4-39	controls-state-change-of	Pathway Commons		CD28	FCGR2A	controls-state-change-of	Pathway Commons		FCGR2A	BAIAP2	controls-state-change-of	Pathway Commons		FYN	INPP5K	catalysis-precedes	Pathway Commons		HSP90AA1	GNB1	controls-state-change-of	Pathway Commons		PIK3R1	INPP5D	catalysis-precedes	Pathway Commons		LAT2	GNB4	controls-state-change-of	Pathway Commons		HBEGF	FGFR2	controls-state-change-of	Pathway Commons
LCK	IGHV3-30	controls-state-change-of	Pathway Commons		FCGR3A	IGKV1-5	controls-state-change-of	Pathway Commons		HSP90AA1	BCR	controls-state-change-of	Pathway Commons		SYK	TFG	controls-state-change-of	Pathway Commons		RAC1	FCGR3A	controls-state-change-of	Pathway Commons		PIP4K2A	THOC5	catalysis-precedes	Pathway Commons		PIK3R3	LCK	in-complex-with	Pathway Commons		PIK3R1	HBEGF	in-complex-with	Pathway Commons
HCK	CD86	controls-state-change-of	Pathway Commons		CD28	IGHV2-5	controls-state-change-of	Pathway Commons		TRIM24	WASF2	controls-state-change-of	Pathway Commons		TRIM24	VAV3	controls-state-change-of	Pathway Commons		CLTC	FCGR2A	controls-state-change-of	Pathway Commons		GNB1	LAT	controls-state-change-of	Pathway Commons		HCK	CD86	controls-state-change-of	Pathway Commons		EPOR	FGF18	controls-state-change-of	Pathway Commons
IGLV1-40	FYN	controls-state-change-of	Pathway Commons		KLB	AKT3	controls-state-change-of	Pathway Commons		IRAK1	FGF2	controls-state-change-of	Pathway Commons		CD247	TRIM24	controls-state-change-of	Pathway Commons		ANAPC15	ANAPC5	in-complex-with	Pathway Commons		DVL2	AXL	catalysis-precedes	Pathway Commons		MDK	CYFIP1	controls-state-change-of	Pathway Commons		EPOR	GNG12	controls-state-change-of	Pathway Commons
AREG	CD28	controls-state-change-of	Pathway Commons		GNB5	IGLV3-25	controls-state-change-of	Pathway Commons		IRS2	CD247	controls-state-change-of	Pathway Commons		CD247	ERLIN2	controls-state-change-of	Pathway Commons		RAC1	ZMYM2	controls-state-change-of	Pathway Commons		PIP5K1B	CPSF6	catalysis-precedes	Pathway Commons		GNB5	CD86	controls-state-change-of	Pathway Commons		TRAT1	TEC	controls-state-change-of	Pathway Commons
AREG	FGF1	controls-state-change-of	Pathway Commons		IGHV3-33	ALKAL2	controls-state-change-of	Pathway Commons		AXL	CD86	controls-state-change-of	Pathway Commons		SYK	TXK	controls-state-change-of	Pathway Commons		STAT1	SH3KBP1	controls-state-change-of	Pathway Commons		CD3G	AKT2	controls-state-change-of	Pathway Commons		AREG	CD28	controls-state-change-of	Pathway Commons		IL33	TXK	controls-state-change-of	Pathway Commons
CD28	IGHM	controls-state-change-of	Pathway Commons		CNTRL	FCGR2A	controls-state-change-of	Pathway Commons		NTRK3	PLCG2	controls-state-change-of	Pathway Commons		SH2D2A	PDPK1	controls-state-change-of	Pathway Commons		LRRFIP1	NPM1	controls-state-change-of	Pathway Commons		HSP90AA1	CBL	controls-state-change-of	Pathway Commons		GNG11	GRAP2	controls-state-change-of	Pathway Commons		SOS1	CD247	controls-state-change-of	Pathway Commons
FCGR1A	IGLV2-23	controls-state-change-of	Pathway Commons		IGHG4	BTK	controls-state-change-of	Pathway Commons		ERBB2	INPP5D	catalysis-precedes	Pathway Commons		SHC1	KRAS	controls-state-change-of	Pathway Commons		PIP4K2A	EREG	catalysis-precedes	Pathway Commons		UBE2E1	CDC27	in-complex-with	Pathway Commons		INPP5D	LCP2	controls-state-change-of	Pathway Commons		BDNF	PTN	controls-state-change-of	Pathway Commons
MYD88	FCGR3A	controls-state-change-of	Pathway Commons		GNB4	IGKV3-11	controls-state-change-of	Pathway Commons		NTRK2	FGF2	controls-state-change-of	Pathway Commons		CBL	INPP5K	catalysis-precedes	Pathway Commons		LRRFIP1	FCGR3A	controls-state-change-of	Pathway Commons		GAB2	INPP5D	catalysis-precedes	Pathway Commons		AREG	FGF1	controls-state-change-of	Pathway Commons		KLRC2	ITK	controls-state-change-of	Pathway Commons
IGKV4-1	FGFR1	controls-state-change-of	Pathway Commons		INPP5D	TXK	controls-state-change-of	Pathway Commons		PDGFB	GNB2	controls-state-change-of	Pathway Commons		PIK3R3	CNTRL	controls-state-change-of	Pathway Commons		LRRFIP1	ABI1	controls-state-change-of	Pathway Commons		SHC1	AKT3	controls-state-change-of	Pathway Commons		MYD88	FCGR3A	controls-state-change-of	Pathway Commons		HCK	GNB5	controls-state-change-of	Pathway Commons
FGFR1	IGHV3-7	controls-state-change-of	Pathway Commons		FGFR1OP2	GNG8	controls-state-change-of	Pathway Commons		CSF1R	LCK	controls-state-change-of	Pathway Commons		CD28	ABI2	controls-state-change-of	Pathway Commons		EREG	NPM1	controls-state-change-of	Pathway Commons		CD86	BAG4	controls-state-change-of	Pathway Commons		NTRK3	CYFIP2	controls-state-change-of	Pathway Commons		IL33	FGFR3	controls-state-change-of	Pathway Commons
KLRD1	CD3G	controls-state-change-of	Pathway Commons		IGHV3-30	FGFR1OP2	controls-state-change-of	Pathway Commons		GNG12	TRIM24	controls-state-change-of	Pathway Commons		PIK3CA	MDM2	controls-phosphorylation-of	Pathway Commons		FCGR3A	LAT2	controls-state-change-of	Pathway Commons		ERBB3	MYO18A	controls-state-change-of	Pathway Commons		RAC1	GAB2	controls-state-change-of	Pathway Commons		TGFA	FCGR3A	controls-state-change-of	Pathway Commons
KLRC2	GRAP2	controls-state-change-of	Pathway Commons		KLB	GNGT2	controls-state-change-of	Pathway Commons		STAT3	FGF20	controls-state-change-of	Pathway Commons		IL1RAP	PLCG2	controls-state-change-of	Pathway Commons		PIP4K2A	FCGR3A	catalysis-precedes	Pathway Commons		LYN	FGFR1	controls-state-change-of	Pathway Commons		SHC1	IGHG4	controls-state-change-of	Pathway Commons		GRAP2	FCGR3A	controls-state-change-of	Pathway Commons
IGHV3-11	FYN	controls-state-change-of	Pathway Commons		IGHV3-33	LAT2	controls-state-change-of	Pathway Commons		IL34	FGFR3	controls-state-change-of	Pathway Commons		GNG10	CD3G	controls-state-change-of	Pathway Commons		TYROBP	CD86	controls-state-change-of	Pathway Commons		THOC5	SYK	controls-state-change-of	Pathway Commons		GNG2	INPP5K	catalysis-precedes	Pathway Commons		PIP4K2B	HGF	catalysis-precedes	Pathway Commons
PTN	IGKV3-20	controls-state-change-of	Pathway Commons		GAB3	INPP5D	catalysis-precedes	Pathway Commons		TREM2	FCGR1A	controls-state-change-of	Pathway Commons		ANAPC16	ANAPC1	in-complex-with	Pathway Commons		EREG	GNB2	controls-state-change-of	Pathway Commons		AXL	CD79B	controls-state-change-of	Pathway Commons		IGHG1	GNG10	controls-state-change-of	Pathway Commons		FN1	TXK	controls-state-change-of	Pathway Commons
IL34	LCP2	controls-state-change-of	Pathway Commons		KDR	VAV1	controls-state-change-of	Pathway Commons		HSP90AA1	FGF2	controls-state-change-of	Pathway Commons		CNTRL	AKT3	controls-state-change-of	Pathway Commons		STAT3	BAIAP2	controls-state-change-of	Pathway Commons		B2M	IGKC	controls-state-change-of	Pathway Commons		TREM2	CPSF6	controls-state-change-of	Pathway Commons		KLRC2	FGF7	controls-state-change-of	Pathway Commons
IGLC2	PTN	controls-state-change-of	Pathway Commons		GNG11	IGHG1	controls-state-change-of	Pathway Commons		BCR	FGFR3	controls-state-change-of	Pathway Commons		RAC2	FCGR3A	controls-state-change-of	Pathway Commons		IRAK1	FGFR1OP2	controls-state-change-of	Pathway Commons		TREM2	CYFIP2	controls-state-change-of	Pathway Commons		FGF20	NCK1	controls-state-change-of	Pathway Commons		MDK	CD247	controls-state-change-of	Pathway Commons
IGHV3-9	BTK	controls-state-change-of	Pathway Commons		IGLV1-40	LAT2	controls-state-change-of	Pathway Commons		KITLG	VAV3	controls-state-change-of	Pathway Commons		SOS1	CD247	controls-state-change-of	Pathway Commons		RAC2	RHOA	controls-state-change-of	Pathway Commons		PIK3R5	INPP5D	catalysis-precedes	Pathway Commons		PIK3R3	INPP5K	catalysis-precedes	Pathway Commons		PDGFA	FCGR3A	controls-state-change-of	Pathway Commons
IGKV3-15	LAT	controls-state-change-of	Pathway Commons		TRAF6	DAPP1	controls-state-change-of	Pathway Commons		KITLG	GNB4	controls-state-change-of	Pathway Commons		PIP4K2A	HCK	catalysis-precedes	Pathway Commons		STAT1	RHOA	controls-state-change-of	Pathway Commons		SYK	AKT2	controls-state-change-of	Pathway Commons		KLRD1	CD3G	controls-state-change-of	Pathway Commons		TREM2	BAIAP2	controls-state-change-of	Pathway Commons
IGLV1-44	LAT2	controls-state-change-of	Pathway Commons		IRS2	CD86	controls-state-change-of	Pathway Commons		LAT2	FGF2	controls-state-change-of	Pathway Commons		NQO1	MDH1	catalysis-precedes	Pathway Commons		MDH1	NDUFS2	catalysis-precedes	Pathway Commons		PIK3R1	FCGR2A	controls-state-change-of	Pathway Commons		HBEGF	LCP2	controls-state-change-of	Pathway Commons		GNG2	FGFR4	controls-state-change-of	Pathway Commons
IGHG3	IGKV2-29	controls-state-change-of	Pathway Commons		GNG8	TXK	controls-state-change-of	Pathway Commons		GNB2	CD247	controls-state-change-of	Pathway Commons		JAK2	AKT2	controls-state-change-of	Pathway Commons		PIP4K2A	CLTC	catalysis-precedes	Pathway Commons		GRB2	PIK3R1	in-complex-with	Pathway Commons		JAK2	GNG11	controls-state-change-of	Pathway Commons		GNB5	CD28	controls-state-change-of	Pathway Commons
IL33	PLCG2	controls-state-change-of	Pathway Commons		GNG7	IGLV3-19	controls-state-change-of	Pathway Commons		FGF20	PLCG2	controls-state-change-of	Pathway Commons		AREG	ERLIN2	controls-state-change-of	Pathway Commons		CD86	ZMYM2	controls-state-change-of	Pathway Commons		FYN	PTN	controls-state-change-of	Pathway Commons		GNG2	GRB2	controls-state-change-of	Pathway Commons		PDGFRA	CD79B	controls-state-change-of	Pathway Commons
TYROBP	IGKV2D-28	controls-state-change-of	Pathway Commons		IRAK4	GNG11	controls-state-change-of	Pathway Commons		LCK	GNG2	controls-state-change-of	Pathway Commons		HCK	GNB5	controls-state-change-of	Pathway Commons		LRRFIP1	BAIAP2	controls-state-change-of	Pathway Commons		CBL	FGFR1	controls-state-change-of	Pathway Commons		CPSF6	GNG11	controls-state-change-of	Pathway Commons		TREM2	TXK	controls-state-change-of	Pathway Commons
GNG3	CD86	controls-state-change-of	Pathway Commons		TRAT1	CD79B	controls-state-change-of	Pathway Commons		TREM2	FGFR3	controls-state-change-of	Pathway Commons		PIK3CA	EREG	in-complex-with	Pathway Commons		FGFR1OP2	FCGR2A	controls-state-change-of	Pathway Commons		THOC5	ATIC	controls-state-change-of	Pathway Commons		IRS2	IGHG2	controls-state-change-of	Pathway Commons		PDGFRA	MYO18A	controls-state-change-of	Pathway Commons
TRAT1	IGHV3-30	controls-state-change-of	Pathway Commons		IGHG4	GNB5	controls-state-change-of	Pathway Commons		PIK3AP1	FCGR1A	controls-state-change-of	Pathway Commons		FLT3	ERLIN2	controls-state-change-of	Pathway Commons		AREG	ABI1	controls-state-change-of	Pathway Commons		B2M	FYN	controls-state-change-of	Pathway Commons		GNG11	CD86	controls-state-change-of	Pathway Commons		FN1	GNG2	controls-state-change-of	Pathway Commons
VEGFA	GRAP2	controls-state-change-of	Pathway Commons		CNTRL	LCK	controls-state-change-of	Pathway Commons		GNG4	LCK	controls-state-change-of	Pathway Commons		TRAT1	ERLIN2	controls-state-change-of	Pathway Commons		CUX1	BRK1	controls-state-change-of	Pathway Commons		VAV1	IGKC	controls-state-change-of	Pathway Commons		PIP4K2A	TREM2	catalysis-precedes	Pathway Commons		AXL	GNG12	controls-state-change-of	Pathway Commons
IGKV2-28	FGFR4	controls-state-change-of	Pathway Commons		CNTRL	IGLV3-1	controls-state-change-of	Pathway Commons		GRIN1	KRAS	controls-state-change-of	Pathway Commons		GRAP2	FCGR3A	controls-state-change-of	Pathway Commons		ANAPC16	ANAPC5	in-complex-with	Pathway Commons		DVL2	CPSF6	catalysis-precedes	Pathway Commons		TREM2	ABI1	controls-state-change-of	Pathway Commons		FGF10	CD79B	controls-state-change-of	Pathway Commons
IL34	BTK	controls-state-change-of	Pathway Commons		IGHV4-34	ABI1	controls-state-change-of	Pathway Commons		PLCG2	FCGR2A	controls-state-change-of	Pathway Commons		PIK3CD	NCK1	controls-state-change-of	Pathway Commons		IL1RAP	GNB1	controls-state-change-of	Pathway Commons		EML4	CD79B	controls-state-change-of	Pathway Commons		PDGFRA	LAT2	controls-state-change-of	Pathway Commons		CSF1R	GNG12	controls-state-change-of	Pathway Commons
FCGR1A	IGHG2	controls-state-change-of	Pathway Commons		GAB1	IGKV1-5	controls-state-change-of	Pathway Commons		HSP90AA1	FCGR2A	controls-state-change-of	Pathway Commons		GNG7	LCP2	controls-state-change-of	Pathway Commons		ZMYM2	BAIAP2	controls-state-change-of	Pathway Commons		PIK3R5	CPSF6	controls-state-change-of	Pathway Commons		GAB2	FCGR2A	controls-state-change-of	Pathway Commons		FN1	FGF10	controls-state-change-of	Pathway Commons
KLRD1	IGLV2-23	controls-state-change-of	Pathway Commons		IGHG4	IGHD	controls-state-change-of	Pathway Commons		FN1	VAV2	controls-state-change-of	Pathway Commons		EML4	CD28	controls-state-change-of	Pathway Commons		GNG5	ZMYM2	controls-state-change-of	Pathway Commons		CD3G	GNB1	controls-state-change-of	Pathway Commons		VEGFA	DAPP1	controls-state-change-of	Pathway Commons		IRAK4	PLCG1	controls-state-change-of	Pathway Commons
RAC2	IGKV3-20	controls-state-change-of	Pathway Commons		GAB1	IGLC3	controls-state-change-of	Pathway Commons		FN1	LAT2	controls-state-change-of	Pathway Commons		AREG	SYK	controls-state-change-of	Pathway Commons		FGFR1OP2	GRB2	controls-state-change-of	Pathway Commons		CD247	CPSF6	controls-state-change-of	Pathway Commons		IGLC2	PTN	controls-state-change-of	Pathway Commons		VEGFA	LCK	controls-state-change-of	Pathway Commons
FCGR2A	IGHV3-7	controls-state-change-of	Pathway Commons		IGLV7-43	CD28	controls-state-change-of	Pathway Commons		FCGR2A	LAT2	controls-state-change-of	Pathway Commons		FCGR3A	DAPP1	controls-state-change-of	Pathway Commons		IDH2	ACLY	catalysis-precedes	Pathway Commons		CD247	BAG4	controls-state-change-of	Pathway Commons		JAK2	CYFIP1	controls-state-change-of	Pathway Commons		FGFR4	CD3G	controls-state-change-of	Pathway Commons
FCGR2A	ITK	controls-state-change-of	Pathway Commons		GNG11	INPP5K	catalysis-precedes	Pathway Commons		PIP5K1B	JAK2	catalysis-precedes	Pathway Commons		PIP4K2A	CDC37	catalysis-precedes	Pathway Commons		GNB1	ABI1	controls-state-change-of	Pathway Commons		AXL	CNTRL	controls-state-change-of	Pathway Commons		JAK2	NCKAP1L	controls-state-change-of	Pathway Commons		CSF1	FGF18	controls-state-change-of	Pathway Commons
PIK3R1	LAT2	controls-state-change-of	Pathway Commons		PDGFB	AKT3	controls-state-change-of	Pathway Commons		IRS2	INPP5D	catalysis-precedes	Pathway Commons		ZMYM2	DAPP1	controls-state-change-of	Pathway Commons		CS	SUCLG1	catalysis-precedes	Pathway Commons		PIP5K1B	GAB2	catalysis-precedes	Pathway Commons		STRN	TEC	controls-state-change-of	Pathway Commons		FLT3LG	PLCG1	controls-state-change-of	Pathway Commons
VEGFA	FGF1	controls-state-change-of	Pathway Commons		KIT	IGHM	controls-state-change-of	Pathway Commons		HSP90AA1	LCK	controls-state-change-of	Pathway Commons		GNB5	CD28	controls-state-change-of	Pathway Commons		CPSF6	GRB2	controls-state-change-of	Pathway Commons		TREM2	MDK	controls-state-change-of	Pathway Commons		SHC1	BTK	controls-state-change-of	Pathway Commons		EREG	LAT	controls-state-change-of	Pathway Commons
CD86	PLCG2	controls-state-change-of	Pathway Commons		PIP4K2A	FGFR1	catalysis-precedes	Pathway Commons		EGF	PLCG2	controls-state-change-of	Pathway Commons		PIK3C3	PDPK1	controls-state-change-of	Pathway Commons		GLUD1	IDH2	catalysis-precedes	Pathway Commons		AXL	IGHD	controls-state-change-of	Pathway Commons		HBEGF	GNG7	controls-state-change-of	Pathway Commons		FLT3LG	HRAS	controls-state-change-of	Pathway Commons
GNG4	CD79B	controls-state-change-of	Pathway Commons		FN1	GNG8	controls-state-change-of	Pathway Commons		IRS2	BCR	controls-state-change-of	Pathway Commons		ICOS	SYK	controls-state-change-of	Pathway Commons		CSF1R	BRK1	controls-state-change-of	Pathway Commons		STRN	IGHD	controls-state-change-of	Pathway Commons		GNG10	TXK	controls-state-change-of	Pathway Commons		KIT	GNG11	controls-state-change-of	Pathway Commons
IGHV3-30	VAV1	controls-state-change-of	Pathway Commons		GNG10	IGKV4-1	controls-state-change-of	Pathway Commons		CD86	GNG4	controls-state-change-of	Pathway Commons		RAC1	LCP2	controls-state-change-of	Pathway Commons		HBEGF	RHOA	controls-state-change-of	Pathway Commons		PIK3R5	PTEN	catalysis-precedes	Pathway Commons		IGHG4	CPSF6	controls-state-change-of	Pathway Commons		ERBB3	LCK	controls-state-change-of	Pathway Commons
EPGN	CD86	controls-state-change-of	Pathway Commons		GAB1	IGHV3-33	controls-state-change-of	Pathway Commons		LAT2	GNG4	controls-state-change-of	Pathway Commons		CD28	DAPP1	controls-state-change-of	Pathway Commons		STAT1	LRRFIP1	controls-state-change-of	Pathway Commons		DCTN1	LCP2	controls-state-change-of	Pathway Commons		HSP90AA1	IGHG4	controls-state-change-of	Pathway Commons		EREG	FGF7	controls-state-change-of	Pathway Commons
KLRK1	IGHG2	controls-state-change-of	Pathway Commons		SHC1	IGKV3-20	controls-state-change-of	Pathway Commons		EGF	FCGR1A	controls-state-change-of	Pathway Commons		PIK3CA	GNB5	controls-state-change-of	Pathway Commons		HLA-E	NCKAP1L	controls-state-change-of	Pathway Commons		THOC5	FCGR3A	controls-state-change-of	Pathway Commons		FGF20	LAT2	controls-state-change-of	Pathway Commons		IRS1	GNB5	controls-state-change-of	Pathway Commons
EREG	IGHG3	controls-state-change-of	Pathway Commons		IGLV2-14	SHC1	controls-state-change-of	Pathway Commons		EREG	GNB4	controls-state-change-of	Pathway Commons		RAC2	LAT	controls-state-change-of	Pathway Commons		GNB2	FCGR2A	controls-state-change-of	Pathway Commons		PIP5K1B	VAV1	catalysis-precedes	Pathway Commons		CNTRL	PLCG2	controls-state-change-of	Pathway Commons		PTN	FGFR3	controls-state-change-of	Pathway Commons
IGHV1-2	PTN	controls-state-change-of	Pathway Commons		GNGT2	IGHG3	controls-state-change-of	Pathway Commons		EGFR	TRIM24	controls-state-change-of	Pathway Commons		EPOR	SH3KBP1	controls-state-change-of	Pathway Commons		TYROBP	LRRFIP1	controls-state-change-of	Pathway Commons		KLRD1	FYN	controls-state-change-of	Pathway Commons		FGF20	IGHG2	controls-state-change-of	Pathway Commons		PIK3CD	LAT	controls-state-change-of	Pathway Commons
IGLV3-19	LCK	controls-state-change-of	Pathway Commons		IGKV3-11	CNTRL	controls-state-change-of	Pathway Commons		FGFR3	GNB4	controls-state-change-of	Pathway Commons		FCGR3A	GNG10	controls-state-change-of	Pathway Commons		B2M	WASF2	controls-state-change-of	Pathway Commons		KLRD1	BTK	controls-state-change-of	Pathway Commons		PIK3AP1	GNB5	controls-state-change-of	Pathway Commons		PIP4K2B	FCGR3A	catalysis-precedes	Pathway Commons
CD28	GNG4	controls-state-change-of	Pathway Commons		IGHV3-30	WASF2	controls-state-change-of	Pathway Commons		HSP90AA1	VAV2	controls-state-change-of	Pathway Commons		SH2D2A	INPP5K	catalysis-precedes	Pathway Commons		HSP90AA1	GRB2	controls-state-change-of	Pathway Commons		KLRK1	PLCG1	controls-state-change-of	Pathway Commons		FGF1	SYK	controls-state-change-of	Pathway Commons		GNG2	MDK	controls-state-change-of	Pathway Commons
IGLV2-14	BTK	controls-state-change-of	Pathway Commons		IGKV1-12	NCKAP1L	controls-state-change-of	Pathway Commons		STAT3	TRIM24	controls-state-change-of	Pathway Commons		GNB5	CNTRL	controls-state-change-of	Pathway Commons		PIK3AP1	BAIAP2	controls-state-change-of	Pathway Commons		PIP5K1A	INPPL1	catalysis-precedes	Pathway Commons		ESR1	GNB4	controls-state-change-of	Pathway Commons		CSF1R	GNG2	controls-state-change-of	Pathway Commons
IGLV2-8	LAT2	controls-state-change-of	Pathway Commons		VEGFA	IGHG1	controls-state-change-of	Pathway Commons		PIP5K1B	BCR	catalysis-precedes	Pathway Commons		ICOS	LCP2	controls-state-change-of	Pathway Commons		CDC37	LAT2	controls-state-change-of	Pathway Commons		GNG7	NCK1	controls-state-change-of	Pathway Commons		VEGFA	GRAP2	controls-state-change-of	Pathway Commons		SOS1	PLCG1	controls-state-change-of	Pathway Commons
IL1RL1	IGLV1-44	controls-state-change-of	Pathway Commons		IRAK4	CD28	controls-state-change-of	Pathway Commons		CD247	VAV2	controls-state-change-of	Pathway Commons		CSF2RB	NRAS	controls-state-change-of	Pathway Commons		PIK3AP1	ABI1	controls-state-change-of	Pathway Commons		EML4	LAT	controls-state-change-of	Pathway Commons		CBL	PLCG2	controls-state-change-of	Pathway Commons		EGFR	FGFR4	controls-state-change-of	Pathway Commons
KLRD1	IGLV1-51	controls-state-change-of	Pathway Commons		CD3G	IGHV3-7	controls-state-change-of	Pathway Commons		EREG	GNB5	controls-state-change-of	Pathway Commons		PIK3R4	SYK	controls-state-change-of	Pathway Commons		HLA-E	FCGR3A	controls-state-change-of	Pathway Commons		PIK3CG	CNTRL	controls-state-change-of	Pathway Commons		SH2D2A	GRAP2	controls-state-change-of	Pathway Commons		HCK	GRAP2	controls-state-change-of	Pathway Commons
KLRC2	IGHV4-59	controls-state-change-of	Pathway Commons		IGKV1-39	VAV1	controls-state-change-of	Pathway Commons		CSF1R	GNB4	controls-state-change-of	Pathway Commons		EREG	LAT	controls-state-change-of	Pathway Commons		IRS2	LAT2	controls-state-change-of	Pathway Commons		ERBB3	CPSF6	controls-state-change-of	Pathway Commons		GRB2	CYFIP1	controls-state-change-of	Pathway Commons		FGFR2	INPP5J	catalysis-precedes	Pathway Commons
FYN	IGLV1-47	controls-state-change-of	Pathway Commons		PDGFB	IGLV7-43	controls-state-change-of	Pathway Commons		EGFR	BTK	controls-state-change-of	Pathway Commons		GRAP2	ERLIN2	controls-state-change-of	Pathway Commons		MYD88	TFG	controls-state-change-of	Pathway Commons		EML4	CYFIP2	controls-state-change-of	Pathway Commons		FCGR1A	IGHG2	controls-state-change-of	Pathway Commons		ERBB2	CD247	controls-state-change-of	Pathway Commons
FGF1	IGHM	controls-state-change-of	Pathway Commons		JAK2	DAPP1	controls-state-change-of	Pathway Commons		PIK3R4	GNG12	controls-state-change-of	Pathway Commons		GNG10	NCK1	controls-state-change-of	Pathway Commons		FCGR3A	CUX1	controls-state-change-of	Pathway Commons		GAB2	LCK	controls-state-change-of	Pathway Commons		FLT3LG	BLNK	controls-state-change-of	Pathway Commons		HBEGF	ITK	controls-state-change-of	Pathway Commons
FYN	IGHV3-33	controls-state-change-of	Pathway Commons		IRAK4	CD247	controls-state-change-of	Pathway Commons		IRAK1	CD86	controls-state-change-of	Pathway Commons		PIK3CD	LAT	controls-state-change-of	Pathway Commons		VEGFA	NPM1	controls-state-change-of	Pathway Commons		PIK3CB	FGF2	controls-state-change-of	Pathway Commons		PIP4K2A	CD28	catalysis-precedes	Pathway Commons		HGF	TEC	controls-state-change-of	Pathway Commons
IGHV3-23	GNG3	controls-state-change-of	Pathway Commons		KLB	IGHV3-30	controls-state-change-of	Pathway Commons		HSP90AA1	GNB4	controls-state-change-of	Pathway Commons		ERLIN2	CD247	controls-state-change-of	Pathway Commons		CPSF6	TFG	controls-state-change-of	Pathway Commons		VAV1	CD247	controls-state-change-of	Pathway Commons		JAK2	GNG7	controls-state-change-of	Pathway Commons		HGF	GNB5	controls-state-change-of	Pathway Commons
FYN	IGHV1-2	controls-state-change-of	Pathway Commons		FCGR2A	KLB	controls-state-change-of	Pathway Commons		GNB2	WASF2	controls-state-change-of	Pathway Commons		KLRK1	SYK	controls-state-change-of	Pathway Commons		PIK3AP1	GNB2	controls-state-change-of	Pathway Commons		DVL2	HBEGF	catalysis-precedes	Pathway Commons		PIK3R1	LAT2	controls-state-change-of	Pathway Commons		FCGR2A	FGF7	controls-state-change-of	Pathway Commons
AXL	IGKV1D-39	controls-state-change-of	Pathway Commons		IGHG2	IGHV3-23	controls-state-change-of	Pathway Commons		BAAT	ACLY	catalysis-precedes	Pathway Commons		CD28	ZMYM2	controls-state-change-of	Pathway Commons		GNB1	TFG	controls-state-change-of	Pathway Commons		INPPL1	NCKAP1L	controls-state-change-of	Pathway Commons		PIK3AP1	PTN	controls-state-change-of	Pathway Commons		PIK3R1	PDGFRA	in-complex-with	Pathway Commons
MYD88	IGLV2-23	controls-state-change-of	Pathway Commons		IGHG3	KLB	controls-state-change-of	Pathway Commons		ERBB2	GNB5	controls-state-change-of	Pathway Commons		PIP4K2B	FCGR3A	catalysis-precedes	Pathway Commons		HCK	CPSF6	controls-state-change-of	Pathway Commons		EGLN1	PYCR2	catalysis-precedes	Pathway Commons		GNB3	IGHG4	controls-state-change-of	Pathway Commons		FGF18	TXK	controls-state-change-of	Pathway Commons
FGF7	IGKV2-30	controls-state-change-of	Pathway Commons		IGLC6	ALKAL2	controls-state-change-of	Pathway Commons		SYK	BRK1	controls-state-change-of	Pathway Commons		MYD88	GNG2	controls-state-change-of	Pathway Commons		CSF1R	RHOA	controls-state-change-of	Pathway Commons		EML4	INPPL1	catalysis-precedes	Pathway Commons		GRAP2	AKT3	controls-state-change-of	Pathway Commons		PIK3CD	GNB5	controls-state-change-of	Pathway Commons
IGHG3	IGHV3-11	controls-state-change-of	Pathway Commons		ALKAL2	IGHV2-5	controls-state-change-of	Pathway Commons		MET	FGF20	controls-state-change-of	Pathway Commons		TNRC6C	AGO3	in-complex-with	Pathway Commons		LAT2	CD86	controls-state-change-of	Pathway Commons		STAT3	LAT2	controls-state-change-of	Pathway Commons		VEGFA	FGF1	controls-state-change-of	Pathway Commons		KITLG	CD3G	controls-state-change-of	Pathway Commons
IGKV1-5	FGFR1	controls-state-change-of	Pathway Commons		IGKV1-12	GNGT2	controls-state-change-of	Pathway Commons		INPP5D	BCR	controls-state-change-of	Pathway Commons		HLA-E	LCK	controls-state-change-of	Pathway Commons		LAT2	GNB2	controls-state-change-of	Pathway Commons		HSP90AA1	CD79B	controls-state-change-of	Pathway Commons		CD86	PLCG2	controls-state-change-of	Pathway Commons		KITLG	FGF10	controls-state-change-of	Pathway Commons
FLT3	IGLC3	controls-state-change-of	Pathway Commons		LCK	IGLV3-25	controls-state-change-of	Pathway Commons		SYK	FGF2	controls-state-change-of	Pathway Commons		HCK	GRAP2	controls-state-change-of	Pathway Commons		GNB2	FGFR1OP2	controls-state-change-of	Pathway Commons		HLA-E	GNB1	controls-state-change-of	Pathway Commons		MYD88	TEC	controls-state-change-of	Pathway Commons		FN1	FCGR2A	controls-state-change-of	Pathway Commons
FGF7	IGKC	controls-state-change-of	Pathway Commons		IGLV2-14	TXK	controls-state-change-of	Pathway Commons		PIK3AP1	GNG4	controls-state-change-of	Pathway Commons		SOS1	GNB1	controls-state-change-of	Pathway Commons		FCGR3A	NPM1	controls-state-change-of	Pathway Commons		BAG4	NCKAP1	controls-state-change-of	Pathway Commons		KLRD1	GNG11	controls-state-change-of	Pathway Commons		FGFR3	CD247	controls-state-change-of	Pathway Commons
FGF7	IGKV1-5	controls-state-change-of	Pathway Commons		SH2D2A	ALKAL2	controls-state-change-of	Pathway Commons		IL34	VAV3	controls-state-change-of	Pathway Commons		PDHB	ACAT2	catalysis-precedes	Pathway Commons		IL1RAP	FCGR3A	controls-state-change-of	Pathway Commons		TRIM24	PTEN	catalysis-precedes	Pathway Commons		PIK3R5	NCKAP1L	controls-state-change-of	Pathway Commons		VEGFA	GNG11	controls-state-change-of	Pathway Commons
VAV1	IGHG4	controls-state-change-of	Pathway Commons		AGO2	MOV10	in-complex-with	Pathway Commons		TRIM24	LAT2	controls-state-change-of	Pathway Commons		CDC37	PDPK1	controls-state-change-of	Pathway Commons		RAC2	WASF2	controls-state-change-of	Pathway Commons		PIK3CG	IGKC	controls-state-change-of	Pathway Commons		HSP90AA1	GRAP2	controls-state-change-of	Pathway Commons		FCGR3A	MYO18A	controls-state-change-of	Pathway Commons
KLRK1	IGKV3-11	controls-state-change-of	Pathway Commons		CD19	GNG11	controls-state-change-of	Pathway Commons		HSP90AA1	LCP2	controls-state-change-of	Pathway Commons		CD28	SH3KBP1	controls-state-change-of	Pathway Commons		B2M	SH3KBP1	controls-state-change-of	Pathway Commons		MDK	FCGR1A	controls-state-change-of	Pathway Commons		PDGFB	VAV3	controls-state-change-of	Pathway Commons		IRAK4	FGF7	controls-state-change-of	Pathway Commons
VAV1	LAT	controls-state-change-of	Pathway Commons		EREG	CYFIP2	controls-state-change-of	Pathway Commons		LAT2	WASF2	controls-state-change-of	Pathway Commons		DCTN1	CYFIP2	controls-state-change-of	Pathway Commons		EREG	SH3KBP1	controls-state-change-of	Pathway Commons		SH2D2A	GNB1	controls-state-change-of	Pathway Commons		ZMYM2	FCGR3A	controls-state-change-of	Pathway Commons		TRAT1	MDK	controls-state-change-of	Pathway Commons
ICOS	IGHV3-48	controls-state-change-of	Pathway Commons		HCK	LAT	controls-state-change-of	Pathway Commons		LYN	KRAS	controls-state-change-of	Pathway Commons		PIK3R1	FYN	controls-state-change-of	Pathway Commons		ZMYM2	FCGR2A	controls-state-change-of	Pathway Commons		PIK3CB	PIK3R1	in-complex-with	Pathway Commons		GNGT2	CD247	controls-state-change-of	Pathway Commons		AXL	FGFR1	controls-state-change-of	Pathway Commons
FGFR4	ERLIN2	controls-state-change-of	Pathway Commons		AGO3	TNRC6C	in-complex-with	Pathway Commons		CS	ACO1	catalysis-precedes	Pathway Commons		PIK3CD	GNB5	controls-state-change-of	Pathway Commons		GNB1	WASF2	controls-state-change-of	Pathway Commons		GNG7	SYK	controls-state-change-of	Pathway Commons		INPP5D	NCK1	controls-state-change-of	Pathway Commons		KDR	FGF9	controls-state-change-of	Pathway Commons
CD3G	IGLV3-21	controls-state-change-of	Pathway Commons		IGHV3-33	GNG10	controls-state-change-of	Pathway Commons		CSF1	LCK	controls-state-change-of	Pathway Commons		MYD88	NCK1	controls-state-change-of	Pathway Commons		B2M	BRK1	controls-state-change-of	Pathway Commons		IGKC	VAV1	controls-state-change-of	Pathway Commons		PIK3AP1	PLCG2	controls-state-change-of	Pathway Commons		FCGR2A	TXK	controls-state-change-of	Pathway Commons
GNG4	PTN	controls-state-change-of	Pathway Commons		IGKV1-5	INPP5D	catalysis-precedes	Pathway Commons		PIP5K1B	MET	catalysis-precedes	Pathway Commons		STRN	DAPP1	controls-state-change-of	Pathway Commons		AREG	GNB2	controls-state-change-of	Pathway Commons		FCGR1A	PTN	controls-state-change-of	Pathway Commons		STAT1	CD247	controls-state-change-of	Pathway Commons		FCGR3A	FGFR4	controls-state-change-of	Pathway Commons
IGHV4-34	PLCG2	controls-state-change-of	Pathway Commons		GNG11	IGLC7	controls-state-change-of	Pathway Commons		PIP5K1B	LYN	catalysis-precedes	Pathway Commons		IL1RAP	GRAP2	controls-state-change-of	Pathway Commons		EML4	FGFR1OP2	controls-state-change-of	Pathway Commons		DCTN1	IGHD	controls-state-change-of	Pathway Commons		IGKC	CYFIP2	controls-state-change-of	Pathway Commons		EGFR	FGF2	controls-state-change-of	Pathway Commons
PTN	FCGR2A	controls-state-change-of	Pathway Commons		GNG11	IGHV4-59	controls-state-change-of	Pathway Commons		LAT2	CYFIP1	controls-state-change-of	Pathway Commons		AGO1	MOV10	in-complex-with	Pathway Commons		HBEGF	GNG5	controls-state-change-of	Pathway Commons		FCGR3A	NCKAP1L	controls-state-change-of	Pathway Commons		NTRK3	LCK	controls-state-change-of	Pathway Commons		AREG	BAIAP2	controls-state-change-of	Pathway Commons
ICOS	IGHM	controls-state-change-of	Pathway Commons		LCK	IGLV3-1	controls-state-change-of	Pathway Commons		LAT2	LCK	controls-state-change-of	Pathway Commons		SYK	GNG7	controls-state-change-of	Pathway Commons		LRRFIP1	RAC1	controls-state-change-of	Pathway Commons		MYO18A	CD79A	controls-state-change-of	Pathway Commons		MET	BTK	controls-state-change-of	Pathway Commons		AXL	FGF18	controls-state-change-of	Pathway Commons
MYD88	IGKV3-11	controls-state-change-of	Pathway Commons		KLB	AKT2	controls-state-change-of	Pathway Commons		KITLG	GNG12	controls-state-change-of	Pathway Commons		JAK2	FYN	controls-state-change-of	Pathway Commons		RAC1	LRRFIP1	controls-state-change-of	Pathway Commons		FYN	MYO18A	controls-state-change-of	Pathway Commons		FGF7	IGKC	controls-state-change-of	Pathway Commons		KLRC2	FCGR2A	controls-state-change-of	Pathway Commons
IGHG3	IGLV1-44	controls-state-change-of	Pathway Commons		IGHV4-39	GAB1	controls-state-change-of	Pathway Commons		UBC	SNCA	interacts-with	APPIC		PIK3C3	SOS1	controls-state-change-of	Pathway Commons		HLA-E	GRB2	controls-state-change-of	Pathway Commons		MYD88	TRIM24	controls-state-change-of	Pathway Commons		PLCG2	INPP5K	catalysis-precedes	Pathway Commons		PIP4K2B	EPOR	catalysis-precedes	Pathway Commons
FGFR1	GRAP2	controls-state-change-of	Pathway Commons		IGHV3-33	TXK	controls-state-change-of	Pathway Commons		FCGR1A	WASF2	controls-state-change-of	Pathway Commons		ANAPC1	ANAPC16	in-complex-with	Pathway Commons		B2M	LRRFIP1	controls-state-change-of	Pathway Commons		JAK2	LAT	controls-state-change-of	Pathway Commons		VAV1	IGHG4	controls-state-change-of	Pathway Commons		KLRK1	INPP5D	catalysis-precedes	Pathway Commons
KLRD1	IGKV2-28	controls-state-change-of	Pathway Commons		PIP4K2A	IGHV3-7	catalysis-precedes	Pathway Commons		INPP5D	SYK	controls-state-change-of	Pathway Commons		CBL	GNG2	controls-state-change-of	Pathway Commons		FCGR3A	LRRFIP1	controls-state-change-of	Pathway Commons		GAPDH	NADK	catalysis-precedes	Pathway Commons		AREG	AKT3	controls-state-change-of	Pathway Commons		SH2D2A	CD247	controls-state-change-of	Pathway Commons
FCGR2A	IGKV1-39	controls-state-change-of	Pathway Commons		PLCG2	GNG7	controls-state-change-of	Pathway Commons		IL34	LAT2	controls-state-change-of	Pathway Commons		PIK3C3	GNG2	controls-state-change-of	Pathway Commons		HSP90AA1	NPM1	controls-state-change-of	Pathway Commons		PIK3CB	VAV1	controls-state-change-of	Pathway Commons		VAV1	LAT	controls-state-change-of	Pathway Commons		HBEGF	TEC	controls-state-change-of	Pathway Commons
FGF7	LAT	controls-state-change-of	Pathway Commons		JAK2	IGHV4-59	controls-state-change-of	Pathway Commons		PIP5K1B	KITLG	catalysis-precedes	Pathway Commons		EPOR	GNB1	controls-state-change-of	Pathway Commons		HBEGF	NCKAP1L	controls-state-change-of	Pathway Commons		INPPL1	ATIC	controls-state-change-of	Pathway Commons		DVL1	FGFR1	catalysis-precedes	Pathway Commons		THOC5	CD79B	controls-state-change-of	Pathway Commons
TREM2	CD3G	controls-state-change-of	Pathway Commons		PIK3R2	CD247	controls-state-change-of	Pathway Commons		EGFR	FGFR3	controls-state-change-of	Pathway Commons		RAC2	TXK	controls-state-change-of	Pathway Commons		SLC7A7	BCAT1	catalysis-precedes	Pathway Commons		TRIP11	NRAS	controls-state-change-of	Pathway Commons		BDNF	LCP2	controls-state-change-of	Pathway Commons		KDR	INPP5J	catalysis-precedes	Pathway Commons
GNG3	IGLV2-11	controls-state-change-of	Pathway Commons		NTRK2	IGHV3-33	controls-state-change-of	Pathway Commons		GNB5	FGF2	controls-state-change-of	Pathway Commons		DLD	ACAA2	catalysis-precedes	Pathway Commons		GNB1	FCGR2A	controls-state-change-of	Pathway Commons		STAT1	NCK1	controls-state-change-of	Pathway Commons		PDGFB	ZMYM2	controls-state-change-of	Pathway Commons		GNG2	TEC	controls-state-change-of	Pathway Commons
PTN	IGKV3-15	controls-state-change-of	Pathway Commons		PIK3CD	IGLC7	controls-state-change-of	Pathway Commons		IRS2	GNG12	controls-state-change-of	Pathway Commons		RAC1	SHC1	controls-state-change-of	Pathway Commons		GNG5	LCP2	controls-state-change-of	Pathway Commons		CBL	GNG7	controls-state-change-of	Pathway Commons		HBEGF	TXK	controls-state-change-of	Pathway Commons		FCGR3A	TXK	controls-state-change-of	Pathway Commons
KLRC2	IGHV3-30	controls-state-change-of	Pathway Commons		CD247	IGKV1-5	controls-state-change-of	Pathway Commons		MMAB	SMAD4	interacts-with	Pathway Commons		SUCLG2	ACAT2	catalysis-precedes	Pathway Commons		AREG	CD86	controls-state-change-of	Pathway Commons		TREM2	LAT2	controls-state-change-of	Pathway Commons		PTN	FCGR2A	controls-state-change-of	Pathway Commons		MDK	INPP5J	catalysis-precedes	Pathway Commons
FCGR2A	IGKV3-20	controls-state-change-of	Pathway Commons		PIK3R5	GNG7	controls-state-change-of	Pathway Commons		FCGR1A	BAIAP2	controls-state-change-of	Pathway Commons		PIP4K2B	EPOR	catalysis-precedes	Pathway Commons		FGFR1OP2	SH3KBP1	controls-state-change-of	Pathway Commons		B2M	NCKAP1	controls-state-change-of	Pathway Commons		GNG10	RAC1	controls-state-change-of	Pathway Commons		KIT	CD79B	controls-state-change-of	Pathway Commons
AXL	FCGR3A	controls-state-change-of	Pathway Commons		PIK3R5	ALKAL2	controls-state-change-of	Pathway Commons		CSF1	CD247	controls-state-change-of	Pathway Commons		SH2D2A	CD247	controls-state-change-of	Pathway Commons		ANAPC16	CDC26	in-complex-with	Pathway Commons		PIP5K1A	PIK3CG	catalysis-precedes	Pathway Commons		RHOG	PIK3R3	in-complex-with	Pathway Commons		TREM2	INPP5D	catalysis-precedes	Pathway Commons
IGKV3-20	LAT2	controls-state-change-of	Pathway Commons		GNGT2	IGKV1-39	controls-state-change-of	Pathway Commons		IL34	GNB5	controls-state-change-of	Pathway Commons		PIP4K2A	PIK3R1	catalysis-precedes	Pathway Commons		UBE2D1	UBE2E1	in-complex-with	Pathway Commons		HLA-E	INPPL1	catalysis-precedes	Pathway Commons		IRS1	VAV2	controls-state-change-of	Pathway Commons		CD19	FGFR3	controls-state-change-of	Pathway Commons
CD28	FGFR4	controls-state-change-of	Pathway Commons		PIK3CG	IGKV1-12	controls-state-change-of	Pathway Commons		FN1	HSP90B1	interacts-with	APPIC		FRS2	GNG2	controls-state-change-of	Pathway Commons		B2M	TFG	controls-state-change-of	Pathway Commons		PIP5K1B	SOS1	catalysis-precedes	Pathway Commons		INPP5D	INPP5K	catalysis-precedes	Pathway Commons		FN1	CD247	controls-state-change-of	Pathway Commons
PIK3R1	IGKV4-1	controls-state-change-of	Pathway Commons		RAC2	FCGR2A	controls-state-change-of	Pathway Commons		IRAK1	GNB4	controls-state-change-of	Pathway Commons		CBL	GNB1	controls-state-change-of	Pathway Commons		CSF1R	RAC1	controls-state-change-of	Pathway Commons		TYROBP	AKT2	controls-state-change-of	Pathway Commons		FGFR1	GRAP2	controls-state-change-of	Pathway Commons		THOC5	PLCG1	controls-state-change-of	Pathway Commons
FGFR1	ITK	controls-state-change-of	Pathway Commons		PIK3R1	RHOG	in-complex-with	Pathway Commons		BCR	VAV2	controls-state-change-of	Pathway Commons		FLT3	INPP5K	catalysis-precedes	Pathway Commons		SLC7A7	SLC1A5	catalysis-precedes	Pathway Commons		DVL2	IRAK1	catalysis-precedes	Pathway Commons		FGFR1	GNB3	controls-state-change-of	Pathway Commons		MET	FCGR3A	controls-state-change-of	Pathway Commons
EPGN	IGKV2D-28	controls-state-change-of	Pathway Commons		IRS2	LCK	controls-state-change-of	Pathway Commons		FCGR1A	CYFIP1	controls-state-change-of	Pathway Commons		CLTC	FCGR3A	controls-state-change-of	Pathway Commons		STAT1	GNB2	controls-state-change-of	Pathway Commons		EML4	GRB2	controls-state-change-of	Pathway Commons		FGF7	LAT	controls-state-change-of	Pathway Commons		IRS2	CD3G	controls-state-change-of	Pathway Commons
GRAP2	IGHV4-39	controls-state-change-of	Pathway Commons		MYO18A	IGLC2	controls-state-change-of	Pathway Commons		NTRK2	LAT2	controls-state-change-of	Pathway Commons		JAK2	TFG	controls-state-change-of	Pathway Commons		IL1RAP	NCKAP1L	controls-state-change-of	Pathway Commons		EREG	NCKAP1	controls-state-change-of	Pathway Commons		TREM2	CD3G	controls-state-change-of	Pathway Commons		CSF1	GNG2	controls-state-change-of	Pathway Commons
EPGN	IGHV4-39	controls-state-change-of	Pathway Commons		VEGFA	IGLV3-25	controls-state-change-of	Pathway Commons		AXL	WASF2	controls-state-change-of	Pathway Commons		DCTN1	LAT	controls-state-change-of	Pathway Commons		AREG	WASF2	controls-state-change-of	Pathway Commons		FCGR1A	FGFR1	controls-state-change-of	Pathway Commons		STAT1	CD3G	controls-state-change-of	Pathway Commons		PIK3CD	FGF7	controls-state-change-of	Pathway Commons
CD86	IGLV2-11	controls-state-change-of	Pathway Commons		GNG8	AKT3	controls-state-change-of	Pathway Commons		IRAK1	GNG4	controls-state-change-of	Pathway Commons		FCGR3A	TXK	controls-state-change-of	Pathway Commons		CSF1R	FCGR3A	controls-state-change-of	Pathway Commons		FCGR1A	AKT2	controls-state-change-of	Pathway Commons		SHC1	PTN	controls-state-change-of	Pathway Commons		IL33	GNG2	controls-state-change-of	Pathway Commons
IGLV1-51	GNG2	controls-state-change-of	Pathway Commons		PIK3CD	IGLV1-51	controls-state-change-of	Pathway Commons		UBC	NFKB1	interacts-with	APPIC		TYROBP	PDPK1	controls-state-change-of	Pathway Commons		UBE2D1	ANAPC16	in-complex-with	Pathway Commons		JAK2	SYK	controls-state-change-of	Pathway Commons		VEGFA	MDK	controls-state-change-of	Pathway Commons		AREG	FGF9	controls-state-change-of	Pathway Commons
IL34	FGF1	controls-state-change-of	Pathway Commons		PDGFB	CD28	controls-state-change-of	Pathway Commons		PIP5K1B	FN1	catalysis-precedes	Pathway Commons		PIP4K2B	GAB3	catalysis-precedes	Pathway Commons		CD86	BAIAP2	controls-state-change-of	Pathway Commons		EML4	PLCG2	controls-state-change-of	Pathway Commons		AXL	FCGR3A	controls-state-change-of	Pathway Commons		VEGFA	FGF18	controls-state-change-of	Pathway Commons
IGKV3-11	FGFR1	controls-state-change-of	Pathway Commons		TYROBP	INPP5K	catalysis-precedes	Pathway Commons		PLCG2	BRK1	controls-state-change-of	Pathway Commons		PIK3CA	FRS2	in-complex-with	Pathway Commons		HLA-E	RHOA	controls-state-change-of	Pathway Commons		PIP5K1B	IRAK1	catalysis-precedes	Pathway Commons		CD28	MDK	controls-state-change-of	Pathway Commons		ERBB3	FGF18	controls-state-change-of	Pathway Commons
ESR1	FGF7	controls-state-change-of	Pathway Commons		KLB	GNG8	controls-state-change-of	Pathway Commons		GNG12	CD247	controls-state-change-of	Pathway Commons		PIP4K2A	B2M	catalysis-precedes	Pathway Commons		IRS2	KRAS	controls-state-change-of	Pathway Commons		PIP5K1B	CD86	catalysis-precedes	Pathway Commons		GNB5	IGHG2	controls-state-change-of	Pathway Commons		CSF1	INPP5D	catalysis-precedes	Pathway Commons
IGHV4-34	PTN	controls-state-change-of	Pathway Commons		IGHG3	LAT	controls-state-change-of	Pathway Commons		EGF	FGF2	controls-state-change-of	Pathway Commons		TYROBP	GNB1	controls-state-change-of	Pathway Commons		FCGR3A	BRK1	controls-state-change-of	Pathway Commons		FN1	CPSF6	controls-state-change-of	Pathway Commons		RHOG	FGFR1	controls-state-change-of	Pathway Commons		TGFA	INPP5J	catalysis-precedes	Pathway Commons
IGHG3	IGLV2-8	controls-state-change-of	Pathway Commons		IGLV6-57	GNG10	controls-state-change-of	Pathway Commons		GNB4	BCR	controls-state-change-of	Pathway Commons		PIK3R1	CDC37	in-complex-with	Pathway Commons		CSF1R	CD86	controls-state-change-of	Pathway Commons		IL33	GNG7	controls-state-change-of	Pathway Commons		INPP5D	PTN	controls-state-change-of	Pathway Commons		NTRK2	INPP5J	catalysis-precedes	Pathway Commons
CD86	IGKV1-5	controls-state-change-of	Pathway Commons		FGFR1OP2	ABI1	controls-state-change-of	Pathway Commons		FN1	BAIAP2	controls-state-change-of	Pathway Commons		GNG7	CYFIP2	controls-state-change-of	Pathway Commons		IL1RAP	SH3KBP1	controls-state-change-of	Pathway Commons		STRN	PLCG2	controls-state-change-of	Pathway Commons		MDK	GNG11	controls-state-change-of	Pathway Commons		GNG11	FGFR3	controls-state-change-of	Pathway Commons
IGHG4	PTN	controls-state-change-of	Pathway Commons		TYROBP	ABI1	controls-state-change-of	Pathway Commons		GAB3	GNG4	controls-state-change-of	Pathway Commons		ERLIN2	NRAS	controls-state-change-of	Pathway Commons		EREG	GRB2	controls-state-change-of	Pathway Commons		CD247	SOS1	controls-state-change-of	Pathway Commons		CD28	TEC	controls-state-change-of	Pathway Commons		PIK3R1	GNG11	controls-state-change-of	Pathway Commons
AREG	IGHV3-48	controls-state-change-of	Pathway Commons		FGFR1OP2	IGLV3-1	controls-state-change-of	Pathway Commons		TRIM24	VAV2	controls-state-change-of	Pathway Commons		CLTC	GNG10	controls-state-change-of	Pathway Commons		GNB1	FGFR1OP2	controls-state-change-of	Pathway Commons		IGKC	PLCG1	controls-state-change-of	Pathway Commons		GNG7	IGHG4	controls-state-change-of	Pathway Commons		KLRD1	MYO18A	controls-state-change-of	Pathway Commons
CD3G	IGHV3-33	controls-state-change-of	Pathway Commons		CSF1R	ALKAL2	controls-state-change-of	Pathway Commons		GNB4	WASF2	controls-state-change-of	Pathway Commons		EPOR	GNG10	controls-state-change-of	Pathway Commons		PIP4K2A	MYD88	catalysis-precedes	Pathway Commons		SHC1	PLCG2	controls-state-change-of	Pathway Commons		FCGR1A	GNB3	controls-state-change-of	Pathway Commons		MET	GNG11	controls-state-change-of	Pathway Commons
LAT2	IGLV3-21	controls-state-change-of	Pathway Commons		INPP5D	IGLC3	controls-state-change-of	Pathway Commons		EGF	GNB2	controls-state-change-of	Pathway Commons		ICOS	GNG7	controls-state-change-of	Pathway Commons		CDC37	KRAS	controls-state-change-of	Pathway Commons		PIK3CB	CD3G	controls-state-change-of	Pathway Commons		ESR1	FGF7	controls-state-change-of	Pathway Commons		EPOR	FGFR1	controls-state-change-of	Pathway Commons
IGLV3-19	ITK	controls-state-change-of	Pathway Commons		CD28	WASF2	controls-state-change-of	Pathway Commons		CD86	FGFR3	controls-state-change-of	Pathway Commons		IRS2	CD3G	controls-state-change-of	Pathway Commons		RAC2	BAIAP2	controls-state-change-of	Pathway Commons		MYD88	FCGR1A	controls-state-change-of	Pathway Commons		CNTRL	GNGT2	controls-state-change-of	Pathway Commons		KLRD1	CD79B	controls-state-change-of	Pathway Commons
PTN	IGLV3-25	controls-state-change-of	Pathway Commons		EPOR	FGFR1OP2	controls-state-change-of	Pathway Commons		GNG12	BCR	controls-state-change-of	Pathway Commons		LCK	NCK1	controls-state-change-of	Pathway Commons		B2M	FCGR2A	controls-state-change-of	Pathway Commons		IGKC	FGFR1	controls-state-change-of	Pathway Commons		LCK	VAV3	controls-state-change-of	Pathway Commons		GNG11	CD3G	controls-state-change-of	Pathway Commons
TYROBP	IGLV1-51	controls-state-change-of	Pathway Commons		EPOR	NCKAP1L	controls-state-change-of	Pathway Commons		LYN	CD86	controls-state-change-of	Pathway Commons		IL1RAP	NCK1	controls-state-change-of	Pathway Commons		RHOG	LRRFIP1	controls-state-change-of	Pathway Commons		VAV1	MYO18A	controls-state-change-of	Pathway Commons		GNGT2	CD3G	controls-state-change-of	Pathway Commons		MDK	FGF2	controls-state-change-of	Pathway Commons
EPGN	IGLV1-40	controls-state-change-of	Pathway Commons		GRAP2	SHC1	controls-state-change-of	Pathway Commons		CD247	GNG12	controls-state-change-of	Pathway Commons		PIK3CG	SHC1	controls-state-change-of	Pathway Commons		MYD88	NCKAP1L	controls-state-change-of	Pathway Commons		BAG4	GAB2	controls-state-change-of	Pathway Commons		HBEGF	BLNK	controls-state-change-of	Pathway Commons		AXL	AKT2	controls-state-change-of	Pathway Commons
IGHG1	IGKV3-20	controls-state-change-of	Pathway Commons		NRG1	ITK	controls-state-change-of	Pathway Commons		JAK2	CD86	controls-state-change-of	Pathway Commons		CLTC	AKT3	controls-state-change-of	Pathway Commons		MDH2	MDH1	catalysis-precedes	Pathway Commons		HSPA1A	HSP90AB1	in-complex-with	Pathway Commons		HBEGF	LAT	controls-state-change-of	Pathway Commons		INPP5D	MDK	controls-state-change-of	Pathway Commons
IGHV3-33	LAT	controls-state-change-of	Pathway Commons		EML4	IGLC6	controls-state-change-of	Pathway Commons		TREM2	SYK	controls-state-change-of	Pathway Commons		AREG	PIK3CA	in-complex-with	Pathway Commons		STAT1	BAIAP2	controls-state-change-of	Pathway Commons		HCK	MYO18A	controls-state-change-of	Pathway Commons		IGHG4	PTN	controls-state-change-of	Pathway Commons		INPP5D	FCGR3A	controls-state-change-of	Pathway Commons
RAC2	CD247	controls-state-change-of	Pathway Commons		CD19	FCGR2A	controls-state-change-of	Pathway Commons		FCGR2A	LCP2	controls-state-change-of	Pathway Commons		EML4	GNG10	controls-state-change-of	Pathway Commons		PIK3AP1	LAT2	controls-state-change-of	Pathway Commons		B2M	GNB1	controls-state-change-of	Pathway Commons		PDGFA	GNB4	controls-state-change-of	Pathway Commons		PIP4K2B	PIK3R1	catalysis-precedes	Pathway Commons
RAC2	IGHV3-30	controls-state-change-of	Pathway Commons		IGKV4-1	FGFR1OP2	controls-state-change-of	Pathway Commons		INPP5D	BRK1	controls-state-change-of	Pathway Commons		FLT3	GNB1	controls-state-change-of	Pathway Commons		RHOG	GNB1	controls-state-change-of	Pathway Commons		PIP5K1A	SHC1	catalysis-precedes	Pathway Commons		VAV1	VAV3	controls-state-change-of	Pathway Commons		GRAP2	GNB5	controls-state-change-of	Pathway Commons
AXL	CD247	controls-state-change-of	Pathway Commons		GRAP2	IGKV3-20	controls-state-change-of	Pathway Commons		MET	GNB2	controls-state-change-of	Pathway Commons		CD3G	RAC1	controls-state-change-of	Pathway Commons		KIF5B	NCKAP1L	controls-state-change-of	Pathway Commons		FYN	LAT2	controls-state-change-of	Pathway Commons		MDK	SH3KBP1	controls-state-change-of	Pathway Commons		IL33	FGF18	controls-state-change-of	Pathway Commons
GNG2	IGHV4-59	controls-state-change-of	Pathway Commons		INPP5D	IGLV3-19	controls-state-change-of	Pathway Commons		MET	VAV3	controls-state-change-of	Pathway Commons		CNTRL	DAPP1	controls-state-change-of	Pathway Commons		CD86	GNB2	controls-state-change-of	Pathway Commons		PIK3CG	SH3KBP1	controls-state-change-of	Pathway Commons		ESR1	CNTRL	controls-state-change-of	Pathway Commons		PIP4K2B	IRS2	catalysis-precedes	Pathway Commons
EPOR	FGFR4	controls-state-change-of	Pathway Commons		VAV1	SHC1	controls-state-change-of	Pathway Commons		NTRK2	GNB2	controls-state-change-of	Pathway Commons		GOLGB1	NRAS	controls-state-change-of	Pathway Commons		SKP1	NPM1	in-complex-with	Pathway Commons		LRRFIP1	CD79A	controls-state-change-of	Pathway Commons		HLA-E	GNB5	controls-state-change-of	Pathway Commons		MDK	CD3G	controls-state-change-of	Pathway Commons
PTN	GNG2	controls-state-change-of	Pathway Commons		DCTN1	LCK	controls-state-change-of	Pathway Commons		NTRK2	CYFIP1	controls-state-change-of	Pathway Commons		PIK3R4	VAV3	controls-state-change-of	Pathway Commons		HSP90AA1	WASF2	controls-state-change-of	Pathway Commons		FLT3LG	PLCG2	controls-state-change-of	Pathway Commons		PIK3CB	MDM2	controls-phosphorylation-of	Pathway Commons		TGFA	FGF2	controls-state-change-of	Pathway Commons
IGHV3-33	BTK	controls-state-change-of	Pathway Commons		CD19	PLCG2	controls-state-change-of	Pathway Commons		IRS2	BTK	controls-state-change-of	Pathway Commons		STAT1	ITK	controls-state-change-of	Pathway Commons		GNB2	LCP2	controls-state-change-of	Pathway Commons		PIP5K1B	LAT2	catalysis-precedes	Pathway Commons		IRS1	INPP5K	catalysis-precedes	Pathway Commons		CSF1R	BAIAP2	controls-state-change-of	Pathway Commons
EPOR	IGLV2-11	controls-state-change-of	Pathway Commons		IL33	SHC1	controls-state-change-of	Pathway Commons		KITLG	BRK1	controls-state-change-of	Pathway Commons		B2M	DAPP1	controls-state-change-of	Pathway Commons		HBEGF	CD86	controls-state-change-of	Pathway Commons		GAB2	FCGR1A	controls-state-change-of	Pathway Commons		GRB2	GNGT2	controls-state-change-of	Pathway Commons		KLRK1	GNG2	controls-state-change-of	Pathway Commons
FCGR1A	IGKV3-15	controls-state-change-of	Pathway Commons		PIK3R5	IGLC3	controls-state-change-of	Pathway Commons		FGF20	INPP5D	catalysis-precedes	Pathway Commons		PIP4K2A	ICOS	catalysis-precedes	Pathway Commons		FGFR1OP2	RAC1	controls-state-change-of	Pathway Commons		PIP5K1A	CNTRL	catalysis-precedes	Pathway Commons		GNB3	INPP5D	catalysis-precedes	Pathway Commons		PDGFRB	FGF7	controls-state-change-of	Pathway Commons
CD3G	IGHV4-34	controls-state-change-of	Pathway Commons		TRAT1	IGHV3-7	controls-state-change-of	Pathway Commons		ANAPC7	ANAPC15	in-complex-with	Pathway Commons		ICOS	ITK	controls-state-change-of	Pathway Commons		FCGR3A	RAC1	controls-state-change-of	Pathway Commons		INPP5D	SHC1	controls-state-change-of	Pathway Commons		VEGFA	CPSF6	controls-state-change-of	Pathway Commons		HGF	CYFIP2	controls-state-change-of	Pathway Commons
IGLC7	FYN	controls-state-change-of	Pathway Commons		ICOS	SHC1	controls-state-change-of	Pathway Commons		BCR	FCGR2A	controls-state-change-of	Pathway Commons		PIK3R3	TRIM24	controls-state-change-of	Pathway Commons		CLTC	RAC1	controls-state-change-of	Pathway Commons		FCGR1A	IGHD	controls-state-change-of	Pathway Commons		IGHG2	INPP5D	catalysis-precedes	Pathway Commons		IRAK4	FGF10	controls-state-change-of	Pathway Commons
GNG4	CD80	controls-state-change-of	Pathway Commons		LCK	FCGR1A	controls-state-change-of	Pathway Commons		INPP5D	CD247	controls-state-change-of	Pathway Commons		PIK3AP1	TXK	controls-state-change-of	Pathway Commons		CUX1	FCGR3A	controls-state-change-of	Pathway Commons		PTN	LCP2	controls-state-change-of	Pathway Commons		IRS2	AKT3	controls-state-change-of	Pathway Commons		SH2D2A	FGFR2	controls-state-change-of	Pathway Commons
AXL	PLCG2	controls-state-change-of	Pathway Commons		IGLC6	TXK	controls-state-change-of	Pathway Commons		IL34	VAV2	controls-state-change-of	Pathway Commons		PIP4K2B	PIK3R1	catalysis-precedes	Pathway Commons		CPSF6	BRK1	controls-state-change-of	Pathway Commons		CNTRL	SYK	controls-state-change-of	Pathway Commons		AREG	DAPP1	controls-state-change-of	Pathway Commons		CD28	FGFR1	controls-state-change-of	Pathway Commons
EPOR	PTN	controls-state-change-of	Pathway Commons		IGHV2-5	PLCG2	controls-state-change-of	Pathway Commons		MYD88	FGF20	controls-state-change-of	Pathway Commons		GRAP2	GNB5	controls-state-change-of	Pathway Commons		NPM1	RB1	controls-state-change-of	Pathway Commons		INPP5D	FCGR1A	controls-state-change-of	Pathway Commons		IRS2	ZMYM2	controls-state-change-of	Pathway Commons		CD209	HRAS	controls-state-change-of	Pathway Commons
HGF	FGF1	controls-state-change-of	Pathway Commons		MDK	GNG2	controls-state-change-of	Pathway Commons		PIK3R4	CYFIP1	controls-state-change-of	Pathway Commons		SUCLG2	ACADSB	catalysis-precedes	Pathway Commons		HCK	FGFR1OP2	controls-state-change-of	Pathway Commons		STAT3	SHC1	controls-state-change-of	Pathway Commons		NTRK3	PTN	controls-state-change-of	Pathway Commons		PDGFA	TXK	controls-state-change-of	Pathway Commons
LCK	IGHV1-69	controls-state-change-of	Pathway Commons		TRAT1	KLB	controls-state-change-of	Pathway Commons		CS	PDHB	catalysis-precedes	Pathway Commons		HLA-E	PDPK1	controls-state-change-of	Pathway Commons		CPSF6	WASF2	controls-state-change-of	Pathway Commons		PIK3CB	CPSF6	controls-state-change-of	Pathway Commons		DVL1	GRB2	catalysis-precedes	Pathway Commons		BTC	FGFR1	controls-state-change-of	Pathway Commons
TYROBP	IGLV3-21	controls-state-change-of	Pathway Commons		CD86	LAT2	controls-state-change-of	Pathway Commons		MET	GNG2	controls-state-change-of	Pathway Commons		EREG	SYK	controls-state-change-of	Pathway Commons		FCGR3A	GNG5	controls-state-change-of	Pathway Commons		PIK3CD	CD79B	controls-state-change-of	Pathway Commons		AXL	GAB2	controls-state-change-of	Pathway Commons		TRAF6	FGFR1	controls-state-change-of	Pathway Commons
ICOS	IGKV2D-28	controls-state-change-of	Pathway Commons		RHOG	IGKC	controls-state-change-of	Pathway Commons		IRS2	TRIM24	controls-state-change-of	Pathway Commons		PIP4K2B	IRS2	catalysis-precedes	Pathway Commons		FCGR3A	SH3KBP1	controls-state-change-of	Pathway Commons		CSF1R	CD247	controls-state-change-of	Pathway Commons		RAC2	CD247	controls-state-change-of	Pathway Commons		MET	CD79B	controls-state-change-of	Pathway Commons
IGLC7	PTN	controls-state-change-of	Pathway Commons		NRG1	CD86	controls-state-change-of	Pathway Commons		MYD88	WASF2	controls-state-change-of	Pathway Commons		PIP4K2A	DCTN1	catalysis-precedes	Pathway Commons		EML4	ZMYM2	controls-state-change-of	Pathway Commons		PIK3CG	MDK	controls-state-change-of	Pathway Commons		HBEGF	FGF1	controls-state-change-of	Pathway Commons		CSF1	CYFIP2	controls-state-change-of	Pathway Commons
CD80	IGHM	controls-state-change-of	Pathway Commons		LYN	GNG2	controls-state-change-of	Pathway Commons		IRAK1	VAV2	controls-state-change-of	Pathway Commons		TYROBP	ITK	controls-state-change-of	Pathway Commons		CD86	LRRFIP1	controls-state-change-of	Pathway Commons		PIP5K1A	CSF1R	catalysis-precedes	Pathway Commons		AXL	CD247	controls-state-change-of	Pathway Commons		MET	FGFR2	controls-state-change-of	Pathway Commons
FLT3	IGKV3-11	controls-state-change-of	Pathway Commons		IGKV1-39	INPP5K	catalysis-precedes	Pathway Commons		KITLG	LCP2	controls-state-change-of	Pathway Commons		KLRK1	GNG2	controls-state-change-of	Pathway Commons		FCGR2A	RHOA	controls-state-change-of	Pathway Commons		DVL2	IL33	catalysis-precedes	Pathway Commons		ITCH	IKBKG	controls-state-change-of	Pathway Commons		PIK3CD	GRAP2	controls-state-change-of	Pathway Commons
LCK	IGLV2-11	controls-state-change-of	Pathway Commons		SH2D2A	GNG2	controls-state-change-of	Pathway Commons		CD247	GNB4	controls-state-change-of	Pathway Commons		FLT3LG	NCK1	controls-state-change-of	Pathway Commons		STAT1	CUX1	controls-state-change-of	Pathway Commons		CD247	TRIM24	controls-state-change-of	Pathway Commons		UBE2D1	UBE2S	in-complex-with	Pathway Commons		EGFR	INPP5J	catalysis-precedes	Pathway Commons
IGLV3-25	FYN	controls-state-change-of	Pathway Commons		LAT2	CNTRL	controls-state-change-of	Pathway Commons		TRIM24	BLNK	controls-state-change-of	Pathway Commons		PIP4K2B	PIK3AP1	catalysis-precedes	Pathway Commons		AREG	ZMYM2	controls-state-change-of	Pathway Commons		GNG7	INPP5D	catalysis-precedes	Pathway Commons		CD86	SH3KBP1	controls-state-change-of	Pathway Commons		MYO18A	TEC	controls-state-change-of	Pathway Commons
EPGN	GNG2	controls-state-change-of	Pathway Commons		CD3G	PLCG2	controls-state-change-of	Pathway Commons		CSF1R	FCGR1A	controls-state-change-of	Pathway Commons		HLA-E	TFG	controls-state-change-of	Pathway Commons		EREG	BRK1	controls-state-change-of	Pathway Commons		GNG7	CD79B	controls-state-change-of	Pathway Commons		RAC1	CD79B	controls-state-change-of	Pathway Commons		SH2D2A	GNB5	controls-state-change-of	Pathway Commons
PIK3R1	ESR1	in-complex-with	Pathway Commons		IL33	DAPP1	controls-state-change-of	Pathway Commons		VEGFA	BLNK	controls-state-change-of	Pathway Commons		PIK3AP1	CD28	controls-state-change-of	Pathway Commons		VEGFA	CD86	controls-state-change-of	Pathway Commons		DVL2	TREM2	catalysis-precedes	Pathway Commons		PIK3R5	CYFIP2	controls-state-change-of	Pathway Commons		HBEGF	HRAS	controls-state-change-of	Pathway Commons
GAB3	PTN	controls-state-change-of	Pathway Commons		IL33	CD79B	controls-state-change-of	Pathway Commons		LAT2	LCP2	controls-state-change-of	Pathway Commons		KLRK1	AKT3	controls-state-change-of	Pathway Commons		IL1RAP	FCGR2A	controls-state-change-of	Pathway Commons		DCTN1	CD79B	controls-state-change-of	Pathway Commons		PIK3R5	CYFIP1	controls-state-change-of	Pathway Commons		EPOR	FGF10	controls-state-change-of	Pathway Commons
GRAP2	CD80	controls-state-change-of	Pathway Commons		GNG10	AKT3	controls-state-change-of	Pathway Commons		EGFR	WASF2	controls-state-change-of	Pathway Commons		FLT3	PLCG2	controls-state-change-of	Pathway Commons		AREG	BRK1	controls-state-change-of	Pathway Commons		PIP5K1B	MDK	catalysis-precedes	Pathway Commons		PTN	GNG2	controls-state-change-of	Pathway Commons		TRAF6	TEC	controls-state-change-of	Pathway Commons
LCK	IGLV2-8	controls-state-change-of	Pathway Commons		IGKV1-39	KLB	controls-state-change-of	Pathway Commons		FCGR2A	CD247	controls-state-change-of	Pathway Commons		SH2D2A	AKT3	controls-state-change-of	Pathway Commons		HBEGF	WASF2	controls-state-change-of	Pathway Commons		INPP5D	AKT2	controls-state-change-of	Pathway Commons		LYN	SH3KBP1	controls-state-change-of	Pathway Commons		KDR	CD28	controls-state-change-of	Pathway Commons
EPGN	GNG3	controls-state-change-of	Pathway Commons		IGLV1-51	CD28	controls-state-change-of	Pathway Commons		PIK3AP1	LCP2	controls-state-change-of	Pathway Commons		KLRD1	PDPK1	controls-state-change-of	Pathway Commons		HBEGF	NRAS	controls-state-change-of	Pathway Commons		CSF1R	SH3KBP1	controls-state-change-of	Pathway Commons		GNB5	GAB2	controls-state-change-of	Pathway Commons		IRS1	TEC	controls-state-change-of	Pathway Commons
FCGR1A	IGHV3-23	controls-state-change-of	Pathway Commons		IL33	CD247	controls-state-change-of	Pathway Commons		FCGR2A	GNG2	controls-state-change-of	Pathway Commons		IL1RAP	DAPP1	controls-state-change-of	Pathway Commons		GRB2	CDC37	in-complex-with	Pathway Commons		SHC1	KRAS	controls-state-change-of	Pathway Commons		PIK3AP1	LAT	controls-state-change-of	Pathway Commons		FGF2	FCGR3A	controls-state-change-of	Pathway Commons
FCGR2A	IGKV1D-39	controls-state-change-of	Pathway Commons		FGFR1OP2	AKT3	controls-state-change-of	Pathway Commons		FN1	TRIM24	controls-state-change-of	Pathway Commons		FCGR3A	FYN	controls-state-change-of	Pathway Commons		HADHB	SUCLG1	catalysis-precedes	Pathway Commons		SOS1	MYO18A	controls-state-change-of	Pathway Commons		GAB2	GNB5	controls-state-change-of	Pathway Commons		IL33	ITK	controls-state-change-of	Pathway Commons
GRAP2	IGKV1-33	controls-state-change-of	Pathway Commons		HCK	ABI1	controls-state-change-of	Pathway Commons		PIP5K1B	ERBB2	catalysis-precedes	Pathway Commons		GAB3	ATIC	controls-state-change-of	Pathway Commons		LYN	LRRFIP1	controls-state-change-of	Pathway Commons		INPP5D	VAV1	controls-state-change-of	Pathway Commons		FN1	ABI1	controls-state-change-of	Pathway Commons		IRAK4	MDK	controls-state-change-of	Pathway Commons
HGF	PLCG2	controls-state-change-of	Pathway Commons		IGHV4-34	LAT2	controls-state-change-of	Pathway Commons		FGF20	GNG2	controls-state-change-of	Pathway Commons		RAC1	ERLIN2	controls-state-change-of	Pathway Commons		HSP90AA1	ABI1	controls-state-change-of	Pathway Commons		PIK3R1	HBEGF	in-complex-with	Pathway Commons		GRAP2	INPP5K	catalysis-precedes	Pathway Commons		HBEGF	GNG2	controls-state-change-of	Pathway Commons
PTN	IGHV4-34	controls-state-change-of	Pathway Commons		IGLV3-19	CD28	controls-state-change-of	Pathway Commons		NTRK3	TRIM24	controls-state-change-of	Pathway Commons		PIK3CD	GRAP2	controls-state-change-of	Pathway Commons		CPSF6	LAT2	controls-state-change-of	Pathway Commons		SYK	CPSF6	controls-state-change-of	Pathway Commons		AREG	GNG7	controls-state-change-of	Pathway Commons		CD19	FGF7	controls-state-change-of	Pathway Commons
IGHG3	IGKV2D-28	controls-state-change-of	Pathway Commons		IGHG4	IGKC	controls-state-change-of	Pathway Commons		EGF	WASF2	controls-state-change-of	Pathway Commons		CNTRL	PDPK1	controls-state-change-of	Pathway Commons		HSP90AA1	TFG	controls-state-change-of	Pathway Commons		CNTRL	AKT3	controls-state-change-of	Pathway Commons		HBEGF	ZMYM2	controls-state-change-of	Pathway Commons		FCGR3A	BAIAP2	controls-state-change-of	Pathway Commons
KLRD1	BLNK	controls-state-change-of	Pathway Commons		CD3G	GAB1	controls-state-change-of	Pathway Commons		NTRK2	FGF20	controls-state-change-of	Pathway Commons		EML4	GRAP2	controls-state-change-of	Pathway Commons		VEGFA	BRK1	controls-state-change-of	Pathway Commons		PIP5K1A	MDK	catalysis-precedes	Pathway Commons		CPSF6	IGLC2	controls-state-change-of	Pathway Commons		PIP4K2B	CD3G	catalysis-precedes	Pathway Commons
FCGR3A	IGLV3-19	controls-state-change-of	Pathway Commons		STAT1	CD28	controls-state-change-of	Pathway Commons		GNB2	BRK1	controls-state-change-of	Pathway Commons		GNB1	CD28	controls-state-change-of	Pathway Commons		HSP90AA1	FGFR1OP2	controls-state-change-of	Pathway Commons		INPPL1	CPSF6	controls-state-change-of	Pathway Commons		HBEGF	GNB5	controls-state-change-of	Pathway Commons		TREM2	CD79B	controls-state-change-of	Pathway Commons
KLRK1	IGLV1-44	controls-state-change-of	Pathway Commons		RHOG	IGLV3-19	controls-state-change-of	Pathway Commons		LCK	FGF2	controls-state-change-of	Pathway Commons		SH2D2A	GNB5	controls-state-change-of	Pathway Commons		EREG	BAIAP2	controls-state-change-of	Pathway Commons		SOS1	CD247	controls-state-change-of	Pathway Commons		DVL1	PDGFA	catalysis-precedes	Pathway Commons		GNB5	INPP5D	catalysis-precedes	Pathway Commons
IGKV3-15	PTN	controls-state-change-of	Pathway Commons		IGKV4-1	ALKAL2	controls-state-change-of	Pathway Commons		GNB5	BLNK	controls-state-change-of	Pathway Commons		PIP4K2B	FRS2	catalysis-precedes	Pathway Commons		AREG	LAT2	controls-state-change-of	Pathway Commons		DVL2	TRIM24	catalysis-precedes	Pathway Commons		NTRK3	FGF1	controls-state-change-of	Pathway Commons		FGF10	ITK	controls-state-change-of	Pathway Commons
HCK	IGHV3-30	controls-state-change-of	Pathway Commons		GNG7	CD86	controls-state-change-of	Pathway Commons		FGFR3	GNB2	controls-state-change-of	Pathway Commons		GNG7	GRAP2	controls-state-change-of	Pathway Commons		CPSF6	NCKAP1L	controls-state-change-of	Pathway Commons		STAT1	FCGR2A	controls-state-change-of	Pathway Commons		PIK3AP1	GRB2	controls-state-change-of	Pathway Commons		FGFR1	MDK	controls-state-change-of	Pathway Commons
IGLV1-40	GNG4	controls-state-change-of	Pathway Commons		FYN	IGHG1	controls-state-change-of	Pathway Commons		HCK	LAT2	controls-state-change-of	Pathway Commons		HCK	CNTRL	controls-state-change-of	Pathway Commons		CDC37	CPSF6	controls-state-change-of	Pathway Commons		PIP4K2A	HCK	catalysis-precedes	Pathway Commons		IGHG3	GNB4	controls-state-change-of	Pathway Commons		PIP4K2B	FGFR3	catalysis-precedes	Pathway Commons
FGFR1	GNG4	controls-state-change-of	Pathway Commons		IGKC	TXK	controls-state-change-of	Pathway Commons		LCK	BAIAP2	controls-state-change-of	Pathway Commons		GOT2	MDH1	catalysis-precedes	Pathway Commons		ZMYM2	LAT2	controls-state-change-of	Pathway Commons		JAK2	AKT2	controls-state-change-of	Pathway Commons		AXL	PLCG2	controls-state-change-of	Pathway Commons		IRAK4	FCGR3A	controls-state-change-of	Pathway Commons
IGKV3-20	ERLIN2	controls-state-change-of	Pathway Commons		IGHG4	CD80	controls-state-change-of	Pathway Commons		EREG	FCGR1A	controls-state-change-of	Pathway Commons		GOLGB1	KRAS	controls-state-change-of	Pathway Commons		NPM1	CPSF6	controls-state-change-of	Pathway Commons		PIK3R1	NCKAP1	controls-state-change-of	Pathway Commons		SYK	GNB5	controls-state-change-of	Pathway Commons		FN1	CD3G	controls-state-change-of	Pathway Commons
IGKV4-1	FGFR4	controls-state-change-of	Pathway Commons		IGHV3-33	AKT2	controls-state-change-of	Pathway Commons		SPTAN1	KRAS	controls-state-change-of	Pathway Commons		PIK3C3	SHC1	controls-state-change-of	Pathway Commons		STAT1	FGFR1OP2	controls-state-change-of	Pathway Commons		GNB1	PTEN	catalysis-precedes	Pathway Commons		GNG11	PTN	controls-state-change-of	Pathway Commons		PDGFRA	AKT2	controls-state-change-of	Pathway Commons
IGHV3-7	VAV1	controls-state-change-of	Pathway Commons		IRS2	PLCG2	controls-state-change-of	Pathway Commons		CD247	GNB5	controls-state-change-of	Pathway Commons		PIK3CG	SYK	controls-state-change-of	Pathway Commons		IRS2	LRRFIP1	controls-state-change-of	Pathway Commons		INPPL1	LAT2	controls-state-change-of	Pathway Commons		HGF	FGF1	controls-state-change-of	Pathway Commons		MYO18A	GRAP2	controls-state-change-of	Pathway Commons
PIK3R1	ERLIN2	controls-state-change-of	Pathway Commons		KLRD1	CD80	controls-state-change-of	Pathway Commons		VEGFA	CD247	controls-state-change-of	Pathway Commons		GRAP2	GNG10	controls-state-change-of	Pathway Commons		VEGFA	NCKAP1L	controls-state-change-of	Pathway Commons		PIK3CD	NCK1	controls-state-change-of	Pathway Commons		CBL	MDK	controls-state-change-of	Pathway Commons		PDGFRB	CD79A	controls-state-change-of	Pathway Commons
GNG3	IGHV3-11	controls-state-change-of	Pathway Commons		IGLV3-19	GAB1	controls-state-change-of	Pathway Commons		FGF2	FCGR2A	controls-state-change-of	Pathway Commons		PIP4K2A	GNG7	catalysis-precedes	Pathway Commons		MYD88	FCGR2A	controls-state-change-of	Pathway Commons		GNG7	LCP2	controls-state-change-of	Pathway Commons		MDK	VAV3	controls-state-change-of	Pathway Commons		PDGFRA	CD3G	controls-state-change-of	Pathway Commons
TYROBP	GNG2	controls-state-change-of	Pathway Commons		PIK3AP1	IGLV3-19	controls-state-change-of	Pathway Commons		GNG12	FCGR2A	controls-state-change-of	Pathway Commons		RAC1	GNG7	controls-state-change-of	Pathway Commons		EML4	CUX1	controls-state-change-of	Pathway Commons		GRB2	PLCG2	controls-state-change-of	Pathway Commons		HSP90AA1	LAT	controls-state-change-of	Pathway Commons		FGFR4	SOS1	controls-state-change-of	Pathway Commons
EPOR	FYN	controls-state-change-of	Pathway Commons		INPP5D	CYFIP2	controls-state-change-of	Pathway Commons		KITLG	SYK	controls-state-change-of	Pathway Commons		CS	ACAA2	catalysis-precedes	Pathway Commons		GRB2	NPM1	controls-state-change-of	Pathway Commons		FCGR3A	DAPP1	controls-state-change-of	Pathway Commons		FGF20	IGHG1	controls-state-change-of	Pathway Commons		SOS1	FGFR3	controls-state-change-of	Pathway Commons
AXL	CD79B	controls-state-change-of	Pathway Commons		IRS2	IGKV3-11	controls-state-change-of	Pathway Commons		HCK	WASF2	controls-state-change-of	Pathway Commons		EPOR	VAV3	controls-state-change-of	Pathway Commons		STAT3	CPSF6	controls-state-change-of	Pathway Commons		GNG7	MYO18A	controls-state-change-of	Pathway Commons		GNB5	INPP5K	catalysis-precedes	Pathway Commons		PIK3R1	KITLG	in-complex-with	Pathway Commons
IL34	IGKV2-28	controls-state-change-of	Pathway Commons		PIK3C3	IGHV3-7	controls-state-change-of	Pathway Commons		MET	FGFR3	controls-state-change-of	Pathway Commons		EPOR	ZMYM2	controls-state-change-of	Pathway Commons		SKP1	RBX1	in-complex-with	Pathway Commons		MDK	CD247	controls-state-change-of	Pathway Commons		PIK3CD	CD28	controls-state-change-of	Pathway Commons		BTC	BAIAP2	controls-state-change-of	Pathway Commons
VAV1	IGHV3-30	controls-state-change-of	Pathway Commons		AGO4	MOV10	in-complex-with	Pathway Commons		KITLG	CD247	controls-state-change-of	Pathway Commons		DCTN1	FYN	controls-state-change-of	Pathway Commons		HSP90AA1	GNG5	controls-state-change-of	Pathway Commons		STAT3	PLCG2	controls-state-change-of	Pathway Commons		PDGFRA	BLNK	controls-state-change-of	Pathway Commons		FLT3LG	AKT2	controls-state-change-of	Pathway Commons
FYN	IGLV6-57	controls-state-change-of	Pathway Commons		NTRK2	IGKV4-1	controls-state-change-of	Pathway Commons		NTRK3	GNG2	controls-state-change-of	Pathway Commons		TYROBP	DAPP1	controls-state-change-of	Pathway Commons		IDH1	ACO2	catalysis-precedes	Pathway Commons		FCGR1A	CYFIP2	controls-state-change-of	Pathway Commons		PIK3R1	ESR1	in-complex-with	Pathway Commons		PDGFRB	FGFR4	controls-state-change-of	Pathway Commons
VEGFA	IGHV3-7	controls-state-change-of	Pathway Commons		GNB5	KLB	controls-state-change-of	Pathway Commons		HLA-E	GNB2	controls-state-change-of	Pathway Commons		PLCG2	FYN	controls-state-change-of	Pathway Commons		NPM1	LRRFIP1	controls-state-change-of	Pathway Commons		DVL2	STAT3	catalysis-precedes	Pathway Commons		GAB3	PTN	controls-state-change-of	Pathway Commons		KITLG	LAT	controls-state-change-of	Pathway Commons
PTN	IGHM	controls-state-change-of	Pathway Commons		PIK3C3	IGLV2-14	controls-state-change-of	Pathway Commons		CSF1R	FGF20	controls-state-change-of	Pathway Commons		PIK3CA	CNTRL	controls-state-change-of	Pathway Commons		CSF1R	FGFR1OP2	controls-state-change-of	Pathway Commons		MYO18A	PLCG2	controls-state-change-of	Pathway Commons		PIK3R1	INPP5D	catalysis-precedes	Pathway Commons		HCK	INPP5J	catalysis-precedes	Pathway Commons
AREG	IGKV3-15	controls-state-change-of	Pathway Commons		PLCG2	IGHG2	controls-state-change-of	Pathway Commons		LCK	BLNK	controls-state-change-of	Pathway Commons		PIK3CA	CLIP1	in-complex-with	Pathway Commons		CSF1R	NPM1	controls-state-change-of	Pathway Commons		IL33	GAB2	controls-state-change-of	Pathway Commons		ZMYM2	RAC1	controls-state-change-of	Pathway Commons		GNG12	TXK	controls-state-change-of	Pathway Commons
IGKV1-39	GRAP2	controls-state-change-of	Pathway Commons		IGHV3-23	CYFIP2	controls-state-change-of	Pathway Commons		EGFR	INPP5D	catalysis-precedes	Pathway Commons		EML4	LCP2	controls-state-change-of	Pathway Commons		CDC37	NPM1	controls-state-change-of	Pathway Commons		LRRFIP1	IGHD	controls-state-change-of	Pathway Commons		PIK3CD	GNG11	controls-state-change-of	Pathway Commons		GNG2	CD28	controls-state-change-of	Pathway Commons
PIK3R1	FCGR2A	controls-state-change-of	Pathway Commons		IGHV4-34	MDK	controls-state-change-of	Pathway Commons		PIP5K1B	HBEGF	catalysis-precedes	Pathway Commons		SPTA1	NRAS	controls-state-change-of	Pathway Commons		AREG	NPM1	controls-state-change-of	Pathway Commons		CD86	MYO18A	controls-state-change-of	Pathway Commons		PDGFRA	ABI1	controls-state-change-of	Pathway Commons		ERBB3	LAT	controls-state-change-of	Pathway Commons
IGKC	CD80	controls-state-change-of	Pathway Commons		LCK	IGHV4-34	controls-state-change-of	Pathway Commons		CSF1R	WASF2	controls-state-change-of	Pathway Commons		PIP4K2B	CD3G	catalysis-precedes	Pathway Commons		KIF5B	CPSF6	controls-state-change-of	Pathway Commons		IRAK4	PLCG1	controls-state-change-of	Pathway Commons		DVL1	CD28	catalysis-precedes	Pathway Commons		AXL	MYO18A	controls-state-change-of	Pathway Commons
IGLV1-44	FGFR1	controls-state-change-of	Pathway Commons		CD247	AKT2	controls-state-change-of	Pathway Commons		GNG12	WASF2	controls-state-change-of	Pathway Commons		KLRK1	SHC1	controls-state-change-of	Pathway Commons		LRRFIP1	FCGR2A	controls-state-change-of	Pathway Commons		VEGFA	LCK	controls-state-change-of	Pathway Commons		VAV1	INPP5K	catalysis-precedes	Pathway Commons		NTRK2	FCGR3A	controls-state-change-of	Pathway Commons
FYN	PTN	controls-state-change-of	Pathway Commons		EPOR	IGLV3-19	controls-state-change-of	Pathway Commons		EGFR	LAT2	controls-state-change-of	Pathway Commons		ACAT2	SUCLG2	catalysis-precedes	Pathway Commons		ANAPC16	ANAPC11	in-complex-with	Pathway Commons		IRAK1	PLCG1	controls-state-change-of	Pathway Commons		HGF	PLCG2	controls-state-change-of	Pathway Commons		NTRK2	GNG11	controls-state-change-of	Pathway Commons
IGKV4-1	ITK	controls-state-change-of	Pathway Commons		IGLV2-8	FGFR1OP2	controls-state-change-of	Pathway Commons		HBEGF	FGFR3	controls-state-change-of	Pathway Commons		IRAK4	FCGR3A	controls-state-change-of	Pathway Commons		CLTC	NCKAP1L	controls-state-change-of	Pathway Commons		PIK3CB	CD247	controls-state-change-of	Pathway Commons		HSP90AA1	CBL	controls-state-change-of	Pathway Commons		ERBB2	LCK	controls-state-change-of	Pathway Commons
AREG	GNG2	controls-state-change-of	Pathway Commons		PDGFA	AKT3	controls-state-change-of	Pathway Commons		ERBB2	GNG4	controls-state-change-of	Pathway Commons		FLT3LG	ATIC	controls-state-change-of	Pathway Commons		VEGFA	GNB1	controls-state-change-of	Pathway Commons		FLT3LG	PLCG1	controls-state-change-of	Pathway Commons		MYD88	GNB3	controls-state-change-of	Pathway Commons		TRAF6	GNG2	controls-state-change-of	Pathway Commons
FGFR1	IGHV3-11	controls-state-change-of	Pathway Commons		ESR2	IGHG2	controls-state-change-of	Pathway Commons		HBEGF	GNG4	controls-state-change-of	Pathway Commons		GAB3	GNG10	controls-state-change-of	Pathway Commons		CS	ACO2	catalysis-precedes	Pathway Commons		DVL2	HLA-E	catalysis-precedes	Pathway Commons		PDGFA	CD28	controls-state-change-of	Pathway Commons		TGFA	AKT2	controls-state-change-of	Pathway Commons
ERLIN2	IGHV3-30	controls-state-change-of	Pathway Commons		IGKV3-20	TXK	controls-state-change-of	Pathway Commons		CSF1	CYFIP1	controls-state-change-of	Pathway Commons		MYD88	AKT3	controls-state-change-of	Pathway Commons		TYROBP	CUX1	controls-state-change-of	Pathway Commons		EREG	LAT	controls-state-change-of	Pathway Commons		KLRD1	BLNK	controls-state-change-of	Pathway Commons		IL33	FCGR2A	controls-state-change-of	Pathway Commons
IGHG1	GNG2	controls-state-change-of	Pathway Commons		CD19	IGHD	controls-state-change-of	Pathway Commons		VEGFA	FGF20	controls-state-change-of	Pathway Commons		IRAK4	PDPK1	controls-state-change-of	Pathway Commons		HCK	ZMYM2	controls-state-change-of	Pathway Commons		CD86	FGF2	controls-state-change-of	Pathway Commons		PIK3CB	GNG2	controls-state-change-of	Pathway Commons		PIK3CG	FGF2	controls-state-change-of	Pathway Commons
GNG2	CD86	controls-state-change-of	Pathway Commons		IGLC7	GNG8	controls-state-change-of	Pathway Commons		HLA-E	SYK	controls-state-change-of	Pathway Commons		STRN	SYK	controls-state-change-of	Pathway Commons		IRAK1	FCGR2A	controls-state-change-of	Pathway Commons		ERBB3	LCK	controls-state-change-of	Pathway Commons		GAB2	INPP5D	catalysis-precedes	Pathway Commons		TRAT1	GNG2	controls-state-change-of	Pathway Commons
VAV1	IGKC	controls-state-change-of	Pathway Commons		IGLC3	TXK	controls-state-change-of	Pathway Commons		JAK2	TRIM24	controls-state-change-of	Pathway Commons		CD247	CNTRL	controls-state-change-of	Pathway Commons		SUCLG1	SDHD	catalysis-precedes	Pathway Commons		ERBB3	SH3KBP1	controls-state-change-of	Pathway Commons		SHC1	AKT3	controls-state-change-of	Pathway Commons		EGFR	FGF9	controls-state-change-of	Pathway Commons
FGF1	IGHV2-5	controls-state-change-of	Pathway Commons		NRG1	CD247	controls-state-change-of	Pathway Commons		IL34	FCGR1A	controls-state-change-of	Pathway Commons		CDC37	LCP2	controls-state-change-of	Pathway Commons		ANAPC15	ANAPC11	in-complex-with	Pathway Commons		KLRD1	BAG4	controls-state-change-of	Pathway Commons		PDGFB	GRAP2	controls-state-change-of	Pathway Commons		PDGFRA	LAT	controls-state-change-of	Pathway Commons
GNG3	IGLV1-51	controls-state-change-of	Pathway Commons		PIK3R1	GNG7	controls-state-change-of	Pathway Commons		GNB4	BTK	controls-state-change-of	Pathway Commons		STAT1	ATIC	controls-state-change-of	Pathway Commons		IRAK1	WASF2	controls-state-change-of	Pathway Commons		PIK3CD	LAT	controls-state-change-of	Pathway Commons		LYN	FGFR1	controls-state-change-of	Pathway Commons		GRAP2	CD247	controls-state-change-of	Pathway Commons
IGKV1-33	GNG4	controls-state-change-of	Pathway Commons		JAK2	TXK	controls-state-change-of	Pathway Commons		GNG2	CYFIP1	controls-state-change-of	Pathway Commons		PIK3R3	ICOS	in-complex-with	Pathway Commons		KIF5B	GRB2	controls-state-change-of	Pathway Commons		DVL2	TYROBP	catalysis-precedes	Pathway Commons		TRAF6	GNB3	controls-state-change-of	Pathway Commons		CSF1R	FGFR4	controls-state-change-of	Pathway Commons
GRAP2	IGHV3-9	controls-state-change-of	Pathway Commons		TREM2	IGKV3-11	controls-state-change-of	Pathway Commons		GNG2	BCR	controls-state-change-of	Pathway Commons		CAMK2D	NRAS	controls-state-change-of	Pathway Commons		GNB1	NPM1	controls-state-change-of	Pathway Commons		KLRK1	SYK	controls-state-change-of	Pathway Commons		TYROBP	GNG2	controls-state-change-of	Pathway Commons		IRS2	TXK	controls-state-change-of	Pathway Commons
CD28	BTK	controls-state-change-of	Pathway Commons		NRG1	IGHV3-30	controls-state-change-of	Pathway Commons		PDGFB	GNG2	controls-state-change-of	Pathway Commons		PIP4K2A	GRAP2	catalysis-precedes	Pathway Commons		LRRFIP1	GNB1	controls-state-change-of	Pathway Commons		CSF1R	BTK	controls-state-change-of	Pathway Commons		AXL	CD79B	controls-state-change-of	Pathway Commons		GNG12	MDK	controls-state-change-of	Pathway Commons
IL1RL1	IGHV3-33	controls-state-change-of	Pathway Commons		LYN	CNTRL	controls-state-change-of	Pathway Commons		IRS2	FGF20	controls-state-change-of	Pathway Commons		CNTRL	SHC1	controls-state-change-of	Pathway Commons		MYD88	LAT2	controls-state-change-of	Pathway Commons		SOS1	PLCG1	controls-state-change-of	Pathway Commons		TYROBP	GNB3	controls-state-change-of	Pathway Commons		TREM2	FGFR2	controls-state-change-of	Pathway Commons
FCGR2A	IGLV1-51	controls-state-change-of	Pathway Commons		AREG	INPP5K	catalysis-precedes	Pathway Commons		EREG	GNB2	controls-state-change-of	Pathway Commons		FLT3LG	AKT2	controls-state-change-of	Pathway Commons		HLA-E	FCGR2A	controls-state-change-of	Pathway Commons		HLA-E	LCK	controls-state-change-of	Pathway Commons		FGF1	MDK	controls-state-change-of	Pathway Commons		PIP4K2B	CD247	catalysis-precedes	Pathway Commons
CD247	IGHV3-7	controls-state-change-of	Pathway Commons		PIK3AP1	KLB	controls-state-change-of	Pathway Commons		STAT3	BAIAP2	controls-state-change-of	Pathway Commons		EREG	VAV3	controls-state-change-of	Pathway Commons		IRS2	GNG5	controls-state-change-of	Pathway Commons		SYK	PTEN	catalysis-precedes	Pathway Commons		B2M	IGKC	controls-state-change-of	Pathway Commons		PIP4K2B	IRAK4	catalysis-precedes	Pathway Commons
ERLIN2	PLCG2	controls-state-change-of	Pathway Commons		IRAK4	SH3KBP1	controls-state-change-of	Pathway Commons		CSF1	VAV3	controls-state-change-of	Pathway Commons		SHC1	LCK	controls-state-change-of	Pathway Commons		HBEGF	RAC1	controls-state-change-of	Pathway Commons		CNTRL	GAB2	controls-state-change-of	Pathway Commons		RAC1	CPSF6	controls-state-change-of	Pathway Commons		FGFR1	FCGR2A	controls-state-change-of	Pathway Commons
IGLC3	GNG4	controls-state-change-of	Pathway Commons		MYO18A	IGHG1	controls-state-change-of	Pathway Commons		AXL	FCGR2A	controls-state-change-of	Pathway Commons		TGFBR1	FKBP1A	in-complex-with	Pathway Commons		KIF5B	RAC1	controls-state-change-of	Pathway Commons		CD247	LRRFIP1	controls-state-change-of	Pathway Commons		RAC2	ABI1	controls-state-change-of	Pathway Commons		TGFA	MYO18A	controls-state-change-of	Pathway Commons
PDGFRB	IGHG4	controls-state-change-of	Pathway Commons		SH2D2A	IGLV1-51	controls-state-change-of	Pathway Commons		PLCG2	FCGR1A	controls-state-change-of	Pathway Commons		PIK3R4	FCGR3A	controls-state-change-of	Pathway Commons		B2M	RHOA	controls-state-change-of	Pathway Commons		SOS1	GNB1	controls-state-change-of	Pathway Commons		TREM2	CYFIP2	controls-state-change-of	Pathway Commons		KLRD1	FGF9	controls-state-change-of	Pathway Commons
IGLV2-23	LAT2	controls-state-change-of	Pathway Commons		KIT	DAPP1	controls-state-change-of	Pathway Commons		IRAK1	BTK	controls-state-change-of	Pathway Commons		MYD88	DAPP1	controls-state-change-of	Pathway Commons		SUCLG1	HADHB	catalysis-precedes	Pathway Commons		PIP5K1A	FLT3LG	catalysis-precedes	Pathway Commons		PIK3R5	INPP5D	catalysis-precedes	Pathway Commons		HCK	AKT2	controls-state-change-of	Pathway Commons
CD80	IGLV2-8	controls-state-change-of	Pathway Commons		IGLV2-14	KLB	controls-state-change-of	Pathway Commons		CSF1	GNG12	controls-state-change-of	Pathway Commons		GAB3	CD247	controls-state-change-of	Pathway Commons		PIK3AP1	SH3KBP1	controls-state-change-of	Pathway Commons		LAT2	BAG4	controls-state-change-of	Pathway Commons		PDGFA	LCK	controls-state-change-of	Pathway Commons		FGF10	MYO18A	controls-state-change-of	Pathway Commons
EREG	IGLV1-47	controls-state-change-of	Pathway Commons		ALKAL2	GNG2	controls-state-change-of	Pathway Commons		PIP5K1B	GNB2	catalysis-precedes	Pathway Commons		GNG2	CD28	controls-state-change-of	Pathway Commons		NPM1	NCKAP1L	controls-state-change-of	Pathway Commons		FLT3LG	CD86	controls-state-change-of	Pathway Commons		PIK3R1	FCGR2A	controls-state-change-of	Pathway Commons		PDGFRB	PTN	controls-state-change-of	Pathway Commons
IGHV3-33	PTN	controls-state-change-of	Pathway Commons		DCTN1	ABI1	controls-state-change-of	Pathway Commons		LCK	INPP5D	catalysis-precedes	Pathway Commons		PIK3CG	ABI2	controls-state-change-of	Pathway Commons		NPM1	BAIAP2	controls-state-change-of	Pathway Commons		STAT3	MYO18A	controls-state-change-of	Pathway Commons		CBL	GNB4	controls-state-change-of	Pathway Commons		SOS1	GNG12	controls-state-change-of	Pathway Commons
IGKC	ERLIN2	controls-state-change-of	Pathway Commons		PIK3R2	IGHV3-30	controls-state-change-of	Pathway Commons		PIK3AP1	VAV2	controls-state-change-of	Pathway Commons		FRS2	SYK	controls-state-change-of	Pathway Commons		RAC1	FGFR1OP2	controls-state-change-of	Pathway Commons		FGF2	VAV1	controls-state-change-of	Pathway Commons		IGHG3	MDK	controls-state-change-of	Pathway Commons		PTN	CD79B	controls-state-change-of	Pathway Commons
RAC2	IGHV3-11	controls-state-change-of	Pathway Commons		ALKAL2	AKT2	controls-state-change-of	Pathway Commons		GNB5	LCP2	controls-state-change-of	Pathway Commons		SOS1	GNG7	controls-state-change-of	Pathway Commons		RAC2	LAT2	controls-state-change-of	Pathway Commons		FCGR2A	FYN	controls-state-change-of	Pathway Commons		GRB2	PIK3R1	in-complex-with	Pathway Commons		KIT	LAT	controls-state-change-of	Pathway Commons
RAC2	IGLV1-51	controls-state-change-of	Pathway Commons		FN1	LCK	controls-state-change-of	Pathway Commons		PIK3R4	LCP2	controls-state-change-of	Pathway Commons		TRAF6	GNG2	controls-state-change-of	Pathway Commons		CDC37	NRAS	controls-state-change-of	Pathway Commons		PIP5K1B	STAT1	catalysis-precedes	Pathway Commons		PIK3CG	GNG10	controls-state-change-of	Pathway Commons		KLRK1	INPP5J	catalysis-precedes	Pathway Commons
IGLC3	LCK	controls-state-change-of	Pathway Commons		IGLV3-19	AKT3	controls-state-change-of	Pathway Commons		FGF2	INPP5D	catalysis-precedes	Pathway Commons		PIP4K2B	RAC2	catalysis-precedes	Pathway Commons		CDC37	GRB2	in-complex-with	Pathway Commons		DCTN1	CYFIP2	controls-state-change-of	Pathway Commons		PIK3CB	VAV3	controls-state-change-of	Pathway Commons		AXL	TEC	controls-state-change-of	Pathway Commons
KLRK1	IGLC1	controls-state-change-of	Pathway Commons		PIK3R2	FGFR1	controls-state-change-of	Pathway Commons		GAB3	TRIM24	controls-state-change-of	Pathway Commons		TRAT1	GNG2	controls-state-change-of	Pathway Commons		PIK3AP1	FCGR3A	controls-state-change-of	Pathway Commons		PIK3R1	FYN	controls-state-change-of	Pathway Commons		AREG	GNG2	controls-state-change-of	Pathway Commons		GNG2	FGF10	controls-state-change-of	Pathway Commons
IGKV3-11	TXK	controls-state-change-of	Pathway Commons		FYN	IGHG3	controls-state-change-of	Pathway Commons		LCK	GNG4	controls-state-change-of	Pathway Commons		GRAP2	FYN	controls-state-change-of	Pathway Commons		ACO2	IDH1	catalysis-precedes	Pathway Commons		IGKC	FYN	controls-state-change-of	Pathway Commons		CBL	FGFR1	controls-state-change-of	Pathway Commons		IRS1	FGFR1	controls-state-change-of	Pathway Commons
AXL	IGKV1-39	controls-state-change-of	Pathway Commons		VEGFA	IGKV1-5	controls-state-change-of	Pathway Commons		MET	WASF2	controls-state-change-of	Pathway Commons		GRAP2	CD247	controls-state-change-of	Pathway Commons		MYD88	ZMYM2	controls-state-change-of	Pathway Commons		MYD88	NCK1	controls-state-change-of	Pathway Commons		GNG11	GRB2	controls-state-change-of	Pathway Commons		AXL	INPP5D	catalysis-precedes	Pathway Commons
GAB3	IGKV2D-28	controls-state-change-of	Pathway Commons		INPP5D	FCGR2A	controls-state-change-of	Pathway Commons		CD247	GNB2	controls-state-change-of	Pathway Commons		GNB5	VAV3	controls-state-change-of	Pathway Commons		MYD88	FGFR1OP2	controls-state-change-of	Pathway Commons		STRN	DAPP1	controls-state-change-of	Pathway Commons		IGHG1	GNG2	controls-state-change-of	Pathway Commons		VEGFA	CYFIP2	controls-state-change-of	Pathway Commons
TYROBP	IGLV1-44	controls-state-change-of	Pathway Commons		MYO18A	INPP5K	catalysis-precedes	Pathway Commons		EGFR	BLNK	controls-state-change-of	Pathway Commons		CD247	ZMYM2	controls-state-change-of	Pathway Commons		STAT3	GRB2	controls-state-change-of	Pathway Commons		FN1	FCGR2A	controls-state-change-of	Pathway Commons		GNG2	CD86	controls-state-change-of	Pathway Commons		PIK3R1	CD79A	controls-state-change-of	Pathway Commons
IL33	IGHG1	controls-state-change-of	Pathway Commons		LAT2	ALKAL2	controls-state-change-of	Pathway Commons		GAB3	SYK	controls-state-change-of	Pathway Commons		IRS2	TXK	controls-state-change-of	Pathway Commons		PIK3AP1	CD86	controls-state-change-of	Pathway Commons		INPP5D	PLCG2	controls-state-change-of	Pathway Commons		GNG10	LAT2	controls-state-change-of	Pathway Commons		VEGFA	CD79A	controls-state-change-of	Pathway Commons
PTN	IGLC3	controls-state-change-of	Pathway Commons		TYROBP	IGHV4-59	controls-state-change-of	Pathway Commons		NTRK2	SYK	controls-state-change-of	Pathway Commons		GNG10	LAT	controls-state-change-of	Pathway Commons		LAT2	FGFR1OP2	controls-state-change-of	Pathway Commons		FCGR3A	MYO18A	controls-state-change-of	Pathway Commons		VAV1	IGKC	controls-state-change-of	Pathway Commons		GNG2	BAIAP2	controls-state-change-of	Pathway Commons
KLRD1	FYN	controls-state-change-of	Pathway Commons		GAB3	FGFR1OP2	controls-state-change-of	Pathway Commons		TREM2	BTK	controls-state-change-of	Pathway Commons		EPOR	SYK	controls-state-change-of	Pathway Commons		HBEGF	BRK1	controls-state-change-of	Pathway Commons		GRB2	FGF2	controls-state-change-of	Pathway Commons		IRS2	LCP2	controls-state-change-of	Pathway Commons		INPP5D	LCK	controls-state-change-of	Pathway Commons
KLRD1	BTK	controls-state-change-of	Pathway Commons		FGFR1OP2	IGLV3-21	controls-state-change-of	Pathway Commons		TRIM24	BAIAP2	controls-state-change-of	Pathway Commons		PIK3R3	DAPP1	controls-state-change-of	Pathway Commons		TYROBP	RAC1	controls-state-change-of	Pathway Commons		AGO1	MOV10	in-complex-with	Pathway Commons		INPP5D	VAV2	controls-state-change-of	Pathway Commons		BTC	CD79B	controls-state-change-of	Pathway Commons
IGLV3-1	GNG3	controls-state-change-of	Pathway Commons		IGLC7	GNG11	controls-state-change-of	Pathway Commons		HSP90AA1	GNG12	controls-state-change-of	Pathway Commons		PIP4K2B	CD247	catalysis-precedes	Pathway Commons		GNG5	FCGR3A	controls-state-change-of	Pathway Commons		SYK	GNG7	controls-state-change-of	Pathway Commons		CD28	BTK	controls-state-change-of	Pathway Commons		MYO18A	HRAS	controls-state-change-of	Pathway Commons
ICOS	IGHV4-39	controls-state-change-of	Pathway Commons		PDGFA	ITK	controls-state-change-of	Pathway Commons		VEGFA	BTK	controls-state-change-of	Pathway Commons		PIP4K2B	IRAK4	catalysis-precedes	Pathway Commons		EREG	ABI1	controls-state-change-of	Pathway Commons		PIK3CB	SYK	controls-state-change-of	Pathway Commons		EML4	CD79B	controls-state-change-of	Pathway Commons		TGFA	SOS1	controls-state-change-of	Pathway Commons
LAT2	FGFR4	controls-state-change-of	Pathway Commons		MDK	IGHD	controls-state-change-of	Pathway Commons		KITLG	GNG4	controls-state-change-of	Pathway Commons		STRN	CNTRL	controls-state-change-of	Pathway Commons		PIP4K2A	EML4	catalysis-precedes	Pathway Commons		JAK2	FYN	controls-state-change-of	Pathway Commons		PIK3R5	CPSF6	controls-state-change-of	Pathway Commons		FGFR2	PTN	controls-state-change-of	Pathway Commons
FGF1	FCGR1A	controls-state-change-of	Pathway Commons		FYN	IGLV7-43	controls-state-change-of	Pathway Commons		FGF2	FCGR1A	controls-state-change-of	Pathway Commons		PIK3C3	ZMYM2	controls-state-change-of	Pathway Commons		GNG5	NPM1	controls-state-change-of	Pathway Commons		AXL	FGFR1	controls-state-change-of	Pathway Commons		CD247	CPSF6	controls-state-change-of	Pathway Commons		TRAT1	FCGR3A	controls-state-change-of	Pathway Commons
CD247	GNG2	controls-state-change-of	Pathway Commons		KLRD1	IGHV4-39	controls-state-change-of	Pathway Commons		UBC	CHRM2	interacts-with	APPIC		PIK3R4	TRIM24	controls-state-change-of	Pathway Commons		AREG	GNG5	controls-state-change-of	Pathway Commons		PIP5K1B	STAT3	catalysis-precedes	Pathway Commons		GNGT2	CPSF6	controls-state-change-of	Pathway Commons		FCGR2A	BAIAP2	controls-state-change-of	Pathway Commons
TREM2	IGKV1-39	controls-state-change-of	Pathway Commons		GNG10	IGHV4-34	controls-state-change-of	Pathway Commons		TREM2	TRIM24	controls-state-change-of	Pathway Commons		B2M	ZMYM2	controls-state-change-of	Pathway Commons		FCGR3A	GRB2	controls-state-change-of	Pathway Commons		PIK3CB	SHC1	controls-state-change-of	Pathway Commons		PDGFRB	IGHG4	controls-state-change-of	Pathway Commons		FGFR2	MYO18A	controls-state-change-of	Pathway Commons
TREM2	IGHG4	controls-state-change-of	Pathway Commons		IGLV1-40	MDK	controls-state-change-of	Pathway Commons		NTRK2	FCGR2A	controls-state-change-of	Pathway Commons		DLG1	NRAS	controls-state-change-of	Pathway Commons		NPM1	ABI1	controls-state-change-of	Pathway Commons		ERBB3	GNB1	controls-state-change-of	Pathway Commons		FGFR1	INPP5K	catalysis-precedes	Pathway Commons		CD28	PTN	controls-state-change-of	Pathway Commons
EPGN	LCP2	controls-state-change-of	Pathway Commons		LCK	IGHV3-30	controls-state-change-of	Pathway Commons		LAT2	FGF20	controls-state-change-of	Pathway Commons		HCK	AKT2	controls-state-change-of	Pathway Commons		TYROBP	SH3KBP1	controls-state-change-of	Pathway Commons		B2M	NCKAP1L	controls-state-change-of	Pathway Commons		PDGFA	BLNK	controls-state-change-of	Pathway Commons		KITLG	FCGR3A	controls-state-change-of	Pathway Commons
PLCG2	FGF7	controls-state-change-of	Pathway Commons		LAT2	GNB4	controls-state-change-of	Pathway Commons		INPP5D	LAT2	controls-state-change-of	Pathway Commons		PIK3CG	GNB1	controls-state-change-of	Pathway Commons		PIP4K2A	LYN	catalysis-precedes	Pathway Commons		DLD	ACAA2	catalysis-precedes	Pathway Commons		AXL	CNTRL	controls-state-change-of	Pathway Commons		MYO18A	CD3G	controls-state-change-of	Pathway Commons
FGFR1	IGKV2D-28	controls-state-change-of	Pathway Commons		HCK	CD86	controls-state-change-of	Pathway Commons		NTRK3	FGF2	controls-state-change-of	Pathway Commons		PIK3AP1	VAV3	controls-state-change-of	Pathway Commons		FCGR3A	CPSF6	controls-state-change-of	Pathway Commons		GAB2	ATIC	controls-state-change-of	Pathway Commons		DVL1	HGF	catalysis-precedes	Pathway Commons		BTC	INPP5D	catalysis-precedes	Pathway Commons
AREG	IGHG3	controls-state-change-of	Pathway Commons		IGLV1-51	GAB1	controls-state-change-of	Pathway Commons		CS	SUCLG1	catalysis-precedes	Pathway Commons		ZMYM2	VAV3	controls-state-change-of	Pathway Commons		EREG	LCP2	controls-state-change-of	Pathway Commons		VAV1	LAT2	controls-state-change-of	Pathway Commons		TREM2	MDK	controls-state-change-of	Pathway Commons		IRAK4	GNG2	controls-state-change-of	Pathway Commons
ICOS	IGHV3-11	controls-state-change-of	Pathway Commons		IGLV1-40	FYN	controls-state-change-of	Pathway Commons		TRIM24	LCK	controls-state-change-of	Pathway Commons		GNB1	ERLIN2	controls-state-change-of	Pathway Commons		HCK	NCKAP1L	controls-state-change-of	Pathway Commons		EML4	MDK	controls-state-change-of	Pathway Commons		PIP4K2A	RAC2	catalysis-precedes	Pathway Commons		PTN	LAT	controls-state-change-of	Pathway Commons
EPOR	IGKV2-29	controls-state-change-of	Pathway Commons		GNB5	CD86	controls-state-change-of	Pathway Commons		CSF1R	BRK1	controls-state-change-of	Pathway Commons		SHC1	GNG7	controls-state-change-of	Pathway Commons		EML4	LAT2	controls-state-change-of	Pathway Commons		TYROBP	FGFR1OP2	controls-state-change-of	Pathway Commons		PDGFA	GAB2	controls-state-change-of	Pathway Commons		IRS2	CD247	controls-state-change-of	Pathway Commons
FLT3	ITK	controls-state-change-of	Pathway Commons		PIK3R5	IGKV3-20	controls-state-change-of	Pathway Commons		CD247	FGFR3	controls-state-change-of	Pathway Commons		PIK3CD	TFG	controls-state-change-of	Pathway Commons		NPM1	FCGR3A	controls-state-change-of	Pathway Commons		DVL2	FGFR1OP2	catalysis-precedes	Pathway Commons		TYROBP	GNG11	controls-state-change-of	Pathway Commons		BTC	AKT2	controls-state-change-of	Pathway Commons
IGLC2	VAV1	controls-state-change-of	Pathway Commons		AREG	CD28	controls-state-change-of	Pathway Commons		LAT2	BLNK	controls-state-change-of	Pathway Commons		FLT3	SYK	controls-state-change-of	Pathway Commons		LYN	GNB1	controls-state-change-of	Pathway Commons		STAT3	PLCG1	controls-state-change-of	Pathway Commons		KLRD1	BTK	controls-state-change-of	Pathway Commons		THOC5	FGF7	controls-state-change-of	Pathway Commons
IGHG2	LCP2	controls-state-change-of	Pathway Commons		GNG11	GRAP2	controls-state-change-of	Pathway Commons		CSF1	WASF2	controls-state-change-of	Pathway Commons		CDC37	SH3KBP1	controls-state-change-of	Pathway Commons		NPM1	BRK1	controls-state-change-of	Pathway Commons		KLRK1	INPP5D	catalysis-precedes	Pathway Commons		IGHG3	ZMYM2	controls-state-change-of	Pathway Commons		ERBB3	TEC	controls-state-change-of	Pathway Commons
IL1RL1	IGHV3-11	controls-state-change-of	Pathway Commons		IGKV1-12	CD28	controls-state-change-of	Pathway Commons		GNB2	FCGR2A	controls-state-change-of	Pathway Commons		ACAA2	CS	catalysis-precedes	Pathway Commons		IL1RAP	GRB2	controls-state-change-of	Pathway Commons		PIP5K1A	BAG4	catalysis-precedes	Pathway Commons		CD86	ABI1	controls-state-change-of	Pathway Commons		KLRD1	INPP5J	catalysis-precedes	Pathway Commons
VAV1	CD247	controls-state-change-of	Pathway Commons		PIK3CD	IGHM	controls-state-change-of	Pathway Commons		LYN	FGF2	controls-state-change-of	Pathway Commons		AREG	NCK1	controls-state-change-of	Pathway Commons		LAT2	FCGR3A	controls-state-change-of	Pathway Commons		SH2D2A	CD247	controls-state-change-of	Pathway Commons		FCGR2A	ZMYM2	controls-state-change-of	Pathway Commons		TGFA	CD3G	controls-state-change-of	Pathway Commons
CSF1R	IGLC1	controls-state-change-of	Pathway Commons		PIK3R2	ALKAL2	controls-state-change-of	Pathway Commons		PIK3AP1	BAIAP2	controls-state-change-of	Pathway Commons		MYD88	PLCG2	controls-state-change-of	Pathway Commons		RAC1	SH3KBP1	controls-state-change-of	Pathway Commons		PIP4K2A	PIK3R1	catalysis-precedes	Pathway Commons		FGF1	FCGR1A	controls-state-change-of	Pathway Commons		NCAM1	HRAS	controls-state-change-of	Pathway Commons
FCGR1A	IGKV2-28	controls-state-change-of	Pathway Commons		IGHV3-23	MYO18A	controls-state-change-of	Pathway Commons		EGF	CD247	controls-state-change-of	Pathway Commons		CBL	ERLIN2	controls-state-change-of	Pathway Commons		KIF5B	LRRFIP1	controls-state-change-of	Pathway Commons		CSF1R	AKT3	controls-state-change-of	Pathway Commons		CD247	GNG2	controls-state-change-of	Pathway Commons		FLT3LG	SOS1	controls-state-change-of	Pathway Commons
PIK3R6	IGLV6-57	controls-state-change-of	Pathway Commons		IGLV3-19	DAPP1	controls-state-change-of	Pathway Commons		HSP90AA1	BLNK	controls-state-change-of	Pathway Commons		RAC2	TRIM24	controls-state-change-of	Pathway Commons		B2M	GRB2	controls-state-change-of	Pathway Commons		THOC5	CD79B	controls-state-change-of	Pathway Commons		GNG7	NCK1	controls-state-change-of	Pathway Commons		ERBB2	FGF18	controls-state-change-of	Pathway Commons
GAB3	TXK	controls-state-change-of	Pathway Commons		IRAK4	IGLV6-57	controls-state-change-of	Pathway Commons		FCGR1A	BRK1	controls-state-change-of	Pathway Commons		GNB5	DAPP1	controls-state-change-of	Pathway Commons		PIP4K2A	CD86	catalysis-precedes	Pathway Commons		CBL	GNB1	controls-state-change-of	Pathway Commons		EML4	LAT	controls-state-change-of	Pathway Commons		IL33	SOS1	controls-state-change-of	Pathway Commons
IGLC1	GRAP2	controls-state-change-of	Pathway Commons		KIT	MDK	controls-state-change-of	Pathway Commons		IRS2	LAT2	controls-state-change-of	Pathway Commons		CLTC	GNB5	controls-state-change-of	Pathway Commons		LYN	BRK1	controls-state-change-of	Pathway Commons		LAT2	GNG7	controls-state-change-of	Pathway Commons		TREM2	IGHG4	controls-state-change-of	Pathway Commons		NTRK2	GRAP2	controls-state-change-of	Pathway Commons
TYROBP	IGKV4-1	controls-state-change-of	Pathway Commons		INPP5D	LCP2	controls-state-change-of	Pathway Commons		FCGR2A	FGF2	controls-state-change-of	Pathway Commons		PIK3R1	NCK1	controls-state-change-of	Pathway Commons		IRAK1	GNB2	controls-state-change-of	Pathway Commons		B2M	MDK	controls-state-change-of	Pathway Commons		PIK3CG	CNTRL	controls-state-change-of	Pathway Commons		KIT	MYO18A	controls-state-change-of	Pathway Commons
TYROBP	IGHV1-2	controls-state-change-of	Pathway Commons		IGHV2-5	DAPP1	controls-state-change-of	Pathway Commons		GNB2	BCR	controls-state-change-of	Pathway Commons		TRAF6	NCK1	controls-state-change-of	Pathway Commons		B2M	FCGR3A	controls-state-change-of	Pathway Commons		DCTN1	LAT	controls-state-change-of	Pathway Commons		PLCG2	FGF7	controls-state-change-of	Pathway Commons		ERBB2	INPP5D	catalysis-precedes	Pathway Commons
GNG2	FCGR3A	controls-state-change-of	Pathway Commons		LAT2	GNG8	controls-state-change-of	Pathway Commons		ERBB2	TRIM24	controls-state-change-of	Pathway Commons		PIP4K2B	PTPN11	catalysis-precedes	Pathway Commons		VEGFA	ABI1	controls-state-change-of	Pathway Commons		PIP4K2A	B2M	catalysis-precedes	Pathway Commons		IRS1	CD79B	controls-state-change-of	Pathway Commons		PIK3CG	FGFR1	controls-state-change-of	Pathway Commons
GRAP2	IGLV6-57	controls-state-change-of	Pathway Commons		CD28	IGHM	controls-state-change-of	Pathway Commons		PIK3AP1	GNB2	controls-state-change-of	Pathway Commons		ZMYM2	KRAS	controls-state-change-of	Pathway Commons		FCGR3A	ZMYM2	controls-state-change-of	Pathway Commons		TYROBP	GNB1	controls-state-change-of	Pathway Commons		AREG	IGHG3	controls-state-change-of	Pathway Commons		PDGFRA	ITK	controls-state-change-of	Pathway Commons
MYD88	IGHG1	controls-state-change-of	Pathway Commons		CRY2	FBXW7	in-complex-with	Pathway Commons		HBEGF	FGF20	controls-state-change-of	Pathway Commons		MPC1	PDHB	catalysis-precedes	Pathway Commons		CLTC	GNG5	controls-state-change-of	Pathway Commons		BAG4	GNB1	controls-state-change-of	Pathway Commons		EML4	CYFIP2	controls-state-change-of	Pathway Commons		NTRK2	FGF2	controls-state-change-of	Pathway Commons
PLCG2	IGHV3-9	controls-state-change-of	Pathway Commons		TRAT1	IGLC6	controls-state-change-of	Pathway Commons		MYD88	GNB5	controls-state-change-of	Pathway Commons		SHC1	NCK1	controls-state-change-of	Pathway Commons		LRRFIP1	TFG	controls-state-change-of	Pathway Commons		PIK3CD	GAB2	controls-state-change-of	Pathway Commons		GAB2	LCK	controls-state-change-of	Pathway Commons		KDR	TEC	controls-state-change-of	Pathway Commons
IGKV2-30	FYN	controls-state-change-of	Pathway Commons		RAC2	KLB	controls-state-change-of	Pathway Commons		GNG2	SYK	controls-state-change-of	Pathway Commons		ZMYM2	AKT2	controls-state-change-of	Pathway Commons		AREG	SH3KBP1	controls-state-change-of	Pathway Commons		GNG7	CYFIP2	controls-state-change-of	Pathway Commons		RHOG	GNG11	controls-state-change-of	Pathway Commons		CSF1R	LCK	controls-state-change-of	Pathway Commons
IGLC2	CD86	controls-state-change-of	Pathway Commons		IGKV4-1	FGFR1	controls-state-change-of	Pathway Commons		STAT1	VAV3	controls-state-change-of	Pathway Commons		MYD88	VAV3	controls-state-change-of	Pathway Commons		KIF5B	GNG5	controls-state-change-of	Pathway Commons		TREM2	INPP5D	catalysis-precedes	Pathway Commons		TRAF6	GNG7	controls-state-change-of	Pathway Commons		CSF1R	MDK	controls-state-change-of	Pathway Commons
IGHV4-59	PLCG2	controls-state-change-of	Pathway Commons		SHC1	IGHG4	controls-state-change-of	Pathway Commons		GAB3	BAIAP2	controls-state-change-of	Pathway Commons		PIK3R3	RAC2	in-complex-with	Pathway Commons		IRS2	RAC1	controls-state-change-of	Pathway Commons		CD247	BTK	controls-state-change-of	Pathway Commons		PTN	GNB4	controls-state-change-of	Pathway Commons		ERBB2	INPP5J	catalysis-precedes	Pathway Commons
FYN	IGHV3-9	controls-state-change-of	Pathway Commons		GNG2	INPP5K	catalysis-precedes	Pathway Commons		VEGFA	VAV3	controls-state-change-of	Pathway Commons		SYK	GNB1	controls-state-change-of	Pathway Commons		MT-ATP6	ACLY	catalysis-precedes	Pathway Commons		EML4	IGKC	controls-state-change-of	Pathway Commons		IGLC2	VAV1	controls-state-change-of	Pathway Commons		HCK	TXK	controls-state-change-of	Pathway Commons
FCGR3A	IGLV1-51	controls-state-change-of	Pathway Commons		IGHG1	GNG10	controls-state-change-of	Pathway Commons		LAT2	CD86	controls-state-change-of	Pathway Commons		TRAT1	PLCG2	controls-state-change-of	Pathway Commons		NDUFS2	MDH1	catalysis-precedes	Pathway Commons		IGKC	PLCG2	controls-state-change-of	Pathway Commons		IGHG2	LCP2	controls-state-change-of	Pathway Commons		CAMK2D	HRAS	controls-state-change-of	Pathway Commons
GNG2	FGF1	controls-state-change-of	Pathway Commons		FGFR1	IGHV3-7	controls-state-change-of	Pathway Commons		FN1	GNG4	controls-state-change-of	Pathway Commons		PIK3R3	FYN	controls-state-change-of	Pathway Commons		FCGR3A	ABI1	controls-state-change-of	Pathway Commons		PIK3R5	BTK	controls-state-change-of	Pathway Commons		ESR1	TEC	controls-state-change-of	Pathway Commons		PDGFRB	INPP5J	catalysis-precedes	Pathway Commons
GNG3	TXK	controls-state-change-of	Pathway Commons		PDGFA	IGLV2-11	controls-state-change-of	Pathway Commons		LAT2	GNB2	controls-state-change-of	Pathway Commons		TRAT1	FCGR3A	controls-state-change-of	Pathway Commons		FCGR3A	FGFR1OP2	controls-state-change-of	Pathway Commons		CBL	MYO18A	controls-state-change-of	Pathway Commons		HSP90AA1	FGF7	controls-state-change-of	Pathway Commons		PDGFRA	PTN	controls-state-change-of	Pathway Commons
IGHV3-23	LCP2	controls-state-change-of	Pathway Commons		KLRD1	CD3G	controls-state-change-of	Pathway Commons		SYK	INPP5D	catalysis-precedes	Pathway Commons		CD28	TFG	controls-state-change-of	Pathway Commons		AREG	CUX1	controls-state-change-of	Pathway Commons		FN1	CD247	controls-state-change-of	Pathway Commons		VAV1	CD247	controls-state-change-of	Pathway Commons		THOC5	GNG11	controls-state-change-of	Pathway Commons
FYN	IGLC2	controls-state-change-of	Pathway Commons		ALKAL2	GNG10	controls-state-change-of	Pathway Commons		PLCG2	GNB5	controls-state-change-of	Pathway Commons		GAB3	FYN	controls-state-change-of	Pathway Commons		EREG	FGFR1OP2	controls-state-change-of	Pathway Commons		THOC5	PLCG1	controls-state-change-of	Pathway Commons		EML4	IGHG2	controls-state-change-of	Pathway Commons		PDGFRB	CD79B	controls-state-change-of	Pathway Commons
IGLV1-47	LAT	controls-state-change-of	Pathway Commons		JAK2	GNG11	controls-state-change-of	Pathway Commons		CD247	LCK	controls-state-change-of	Pathway Commons		GNG7	PLCG2	controls-state-change-of	Pathway Commons		KIF5B	CUX1	controls-state-change-of	Pathway Commons		DVL2	MDK	catalysis-precedes	Pathway Commons		GAB3	TXK	controls-state-change-of	Pathway Commons		PTN	FGF18	controls-state-change-of	Pathway Commons
CD3G	IGKV4-1	controls-state-change-of	Pathway Commons		IRS2	IGHG2	controls-state-change-of	Pathway Commons		EGF	GNB4	controls-state-change-of	Pathway Commons		PIK3R4	RAC1	controls-state-change-of	Pathway Commons		TYROBP	GNB2	controls-state-change-of	Pathway Commons		PIK3R5	PTN	controls-state-change-of	Pathway Commons		GNG2	FCGR3A	controls-state-change-of	Pathway Commons		TRAF6	GNG11	controls-state-change-of	Pathway Commons
IGKC	VAV1	controls-state-change-of	Pathway Commons		GNG11	CD86	controls-state-change-of	Pathway Commons		IRS2	GNG2	controls-state-change-of	Pathway Commons		EPOR	PLCG2	controls-state-change-of	Pathway Commons		RHOG	FGFR1OP2	controls-state-change-of	Pathway Commons		LCK	NCK1	controls-state-change-of	Pathway Commons		PIK3R1	MDM2	controls-state-change-of	Pathway Commons		ERBB2	FGF7	controls-state-change-of	Pathway Commons
IGHV3-9	LCP2	controls-state-change-of	Pathway Commons		PIP4K2A	TREM2	catalysis-precedes	Pathway Commons		PIP5K1B	CD247	catalysis-precedes	Pathway Commons		KLRK1	ZMYM2	controls-state-change-of	Pathway Commons		RHOG	NPM1	controls-state-change-of	Pathway Commons		SHC1	NCKAP1	controls-state-change-of	Pathway Commons		GNG7	VAV3	controls-state-change-of	Pathway Commons		CSF1R	CD3G	controls-state-change-of	Pathway Commons
FGFR4	IGHV4-39	controls-state-change-of	Pathway Commons		TREM2	ABI1	controls-state-change-of	Pathway Commons		AXL	GNG2	controls-state-change-of	Pathway Commons		KLRD1	ERLIN2	controls-state-change-of	Pathway Commons		EML4	TFG	controls-state-change-of	Pathway Commons		AXL	GNG7	controls-state-change-of	Pathway Commons		LAT2	GNG11	controls-state-change-of	Pathway Commons		SOS1	FGF9	controls-state-change-of	Pathway Commons
KLRD1	FGF7	controls-state-change-of	Pathway Commons		VEGFA	DAPP1	controls-state-change-of	Pathway Commons		PLCG2	LAT2	controls-state-change-of	Pathway Commons		B2M	RAC1	controls-state-change-of	Pathway Commons		HADHA	SUCLG1	catalysis-precedes	Pathway Commons		GRB2	MDK	controls-state-change-of	Pathway Commons		MYD88	IGHG1	controls-state-change-of	Pathway Commons		PDGFRB	FGF10	controls-state-change-of	Pathway Commons
FCGR1A	PTN	controls-state-change-of	Pathway Commons		CSF1R	GNG8	controls-state-change-of	Pathway Commons		NTRK3	GNB5	controls-state-change-of	Pathway Commons		CLTC	CYFIP2	controls-state-change-of	Pathway Commons		IRAK1	ABI1	controls-state-change-of	Pathway Commons		FYN	MDK	controls-state-change-of	Pathway Commons		HSP90AA1	CD79B	controls-state-change-of	Pathway Commons		LCK	GNG2	controls-state-change-of	Pathway Commons
KLRC2	CD247	controls-state-change-of	Pathway Commons		PDGFB	IGHV3-30	controls-state-change-of	Pathway Commons		IL34	CD86	controls-state-change-of	Pathway Commons		GNB1	ABI2	controls-state-change-of	Pathway Commons		CSF1R	LRRFIP1	controls-state-change-of	Pathway Commons		JAK2	BAG4	controls-state-change-of	Pathway Commons		IGHG2	GNG11	controls-state-change-of	Pathway Commons		TREM2	FGFR3	controls-state-change-of	Pathway Commons
GAB3	IGLV3-21	controls-state-change-of	Pathway Commons		GNB4	IGHD	controls-state-change-of	Pathway Commons		IL34	FGF2	controls-state-change-of	Pathway Commons		GNG7	CD247	controls-state-change-of	Pathway Commons		AREG	LCP2	controls-state-change-of	Pathway Commons		PIP5K1A	HSP90AA1	catalysis-precedes	Pathway Commons		IGLC2	CD86	controls-state-change-of	Pathway Commons		TRAT1	FCGR2A	controls-state-change-of	Pathway Commons
PDGFRB	IGHV3-7	controls-state-change-of	Pathway Commons		JAK2	NCKAP1L	controls-state-change-of	Pathway Commons		BCR	GNB4	controls-state-change-of	Pathway Commons		FRS2	TXK	controls-state-change-of	Pathway Commons		CD86	GNB1	controls-state-change-of	Pathway Commons		PIK3CG	SHC1	controls-state-change-of	Pathway Commons		SH2D2A	GNGT2	controls-state-change-of	Pathway Commons		PTN	FGFR1	controls-state-change-of	Pathway Commons
AREG	IGHV4-34	controls-state-change-of	Pathway Commons		JAK2	IGHD	controls-state-change-of	Pathway Commons		PDGFB	GNG4	controls-state-change-of	Pathway Commons		PIK3R3	ERLIN2	controls-state-change-of	Pathway Commons		MYD88	GRB2	controls-state-change-of	Pathway Commons		FGFR1OP2	PTEN	catalysis-precedes	Pathway Commons		PDGFA	GNG7	controls-state-change-of	Pathway Commons		MYO18A	CD28	controls-state-change-of	Pathway Commons
PTN	IGLC2	controls-state-change-of	Pathway Commons		EPOR	IGHD	controls-state-change-of	Pathway Commons		FN1	WASF2	controls-state-change-of	Pathway Commons		KLRD1	PLCG2	controls-state-change-of	Pathway Commons		HSP90AA1	BAIAP2	controls-state-change-of	Pathway Commons		UBE2E1	CDC16	in-complex-with	Pathway Commons		GNG2	FGF1	controls-state-change-of	Pathway Commons		PIK3CG	GRAP2	controls-state-change-of	Pathway Commons
FGFR4	IGLC2	controls-state-change-of	Pathway Commons		SHC1	BTK	controls-state-change-of	Pathway Commons		PIP5K1B	FGF20	catalysis-precedes	Pathway Commons		GNG2	NCK1	controls-state-change-of	Pathway Commons		RAC2	ZMYM2	controls-state-change-of	Pathway Commons		PIK3R5	SOS1	controls-state-change-of	Pathway Commons		PIK3CG	IGKC	controls-state-change-of	Pathway Commons		FGF10	MDK	controls-state-change-of	Pathway Commons
VEGFA	IGLV3-19	controls-state-change-of	Pathway Commons		GNG10	TXK	controls-state-change-of	Pathway Commons		FCGR1A	GNB4	controls-state-change-of	Pathway Commons		PTPN11	ZMYM2	controls-state-change-of	Pathway Commons		SDHC	SUCLG1	catalysis-precedes	Pathway Commons		FGFR1OP2	INPP5D	catalysis-precedes	Pathway Commons		MDK	FCGR1A	controls-state-change-of	Pathway Commons		FLT3LG	CD3G	controls-state-change-of	Pathway Commons
VEGFA	IGHM	controls-state-change-of	Pathway Commons		IGKV3-20	NCKAP1L	controls-state-change-of	Pathway Commons		INPP5D	GNB4	controls-state-change-of	Pathway Commons		PTPN11	PLCG2	controls-state-change-of	Pathway Commons		FGFR1OP2	GNB2	controls-state-change-of	Pathway Commons		CPSF6	CD79B	controls-state-change-of	Pathway Commons		PIK3CB	PIK3R1	in-complex-with	Pathway Commons		INPP5D	SOS1	controls-state-change-of	Pathway Commons
RAC2	IGLV3-25	controls-state-change-of	Pathway Commons		IL33	PLCG2	controls-state-change-of	Pathway Commons		LYN	FGF20	controls-state-change-of	Pathway Commons		B2M	TRIM24	controls-state-change-of	Pathway Commons		PIP4K2A	IRS2	catalysis-precedes	Pathway Commons		VEGFA	TRIM24	controls-state-change-of	Pathway Commons		GNG7	SYK	controls-state-change-of	Pathway Commons		IRS2	INPP5D	catalysis-precedes	Pathway Commons
GNG4	FCGR1A	controls-state-change-of	Pathway Commons		NTRK2	GNB5	controls-state-change-of	Pathway Commons		FCGR2A	PLCG2	controls-state-change-of	Pathway Commons		IRAK4	GNG2	controls-state-change-of	Pathway Commons		PIK3AP1	BRK1	controls-state-change-of	Pathway Commons		CNTRL	NCKAP1	controls-state-change-of	Pathway Commons		IGKC	VAV1	controls-state-change-of	Pathway Commons		FGFR3	MYO18A	controls-state-change-of	Pathway Commons
TREM2	LAT2	controls-state-change-of	Pathway Commons		IGKV4-1	MDK	controls-state-change-of	Pathway Commons		IRAK1	FGFR3	controls-state-change-of	Pathway Commons		FLT3LG	PIK3CA	in-complex-with	Pathway Commons		IRS2	BRK1	controls-state-change-of	Pathway Commons		KLRD1	MYO18A	controls-state-change-of	Pathway Commons		GNG11	CNTRL	controls-state-change-of	Pathway Commons		KDR	CD79A	controls-state-change-of	Pathway Commons
ICOS	IGLV1-47	controls-state-change-of	Pathway Commons		SH2D2A	IGLC6	controls-state-change-of	Pathway Commons		GAB3	FGF20	controls-state-change-of	Pathway Commons		KLRK1	INPP5K	catalysis-precedes	Pathway Commons		LAT2	CPSF6	controls-state-change-of	Pathway Commons		CNTRL	DAPP1	controls-state-change-of	Pathway Commons		GNB5	SYK	controls-state-change-of	Pathway Commons		PDGFRB	GRAP2	controls-state-change-of	Pathway Commons
PIK3R6	IGLC3	controls-state-change-of	Pathway Commons		TRAT1	IGHV3-30	controls-state-change-of	Pathway Commons		FCGR2A	BCR	controls-state-change-of	Pathway Commons		GNB5	ZMYM2	controls-state-change-of	Pathway Commons		RAC2	RAC1	controls-state-change-of	Pathway Commons		HBEGF	DAPP1	controls-state-change-of	Pathway Commons		PLCG2	ZMYM2	controls-state-change-of	Pathway Commons		GRAP2	SOS1	controls-state-change-of	Pathway Commons
MYD88	IGKV4-1	controls-state-change-of	Pathway Commons		MYO18A	CD86	controls-state-change-of	Pathway Commons		GNG2	VAV3	controls-state-change-of	Pathway Commons		IRS2	CD247	controls-state-change-of	Pathway Commons		PIK3AP1	CUX1	controls-state-change-of	Pathway Commons		PTN	ATIC	controls-state-change-of	Pathway Commons		KLRD1	FGF7	controls-state-change-of	Pathway Commons		BTC	MDK	controls-state-change-of	Pathway Commons
IGHG4	IGLV3-21	controls-state-change-of	Pathway Commons		CNTRL	PLCG2	controls-state-change-of	Pathway Commons		CD86	TRIM24	controls-state-change-of	Pathway Commons		CBL	AKT2	controls-state-change-of	Pathway Commons		GNB2	TFG	controls-state-change-of	Pathway Commons		KLRD1	CD79B	controls-state-change-of	Pathway Commons		AXL	VAV3	controls-state-change-of	Pathway Commons		TREM2	LAT	controls-state-change-of	Pathway Commons
KLRK1	IGLV3-21	controls-state-change-of	Pathway Commons		PIK3AP1	GNB5	controls-state-change-of	Pathway Commons		VEGFA	GNG12	controls-state-change-of	Pathway Commons		CBL	CNTRL	controls-state-change-of	Pathway Commons		GNG5	CPSF6	controls-state-change-of	Pathway Commons		CD3G	LRRFIP1	controls-state-change-of	Pathway Commons		FCGR1A	PTN	controls-state-change-of	Pathway Commons		LAT	HRAS	controls-state-change-of	Pathway Commons
IGKV3-11	BTK	controls-state-change-of	Pathway Commons		IGHV3-7	GNB4	controls-state-change-of	Pathway Commons		PDGFB	GNB5	controls-state-change-of	Pathway Commons		FLT3LG	SOS1	controls-state-change-of	Pathway Commons		TYROBP	LAT2	controls-state-change-of	Pathway Commons		MDK	FGF2	controls-state-change-of	Pathway Commons		FCGR3A	NCKAP1L	controls-state-change-of	Pathway Commons		PIK3CG	GNG12	controls-state-change-of	Pathway Commons
IGHG3	FGF1	controls-state-change-of	Pathway Commons		VEGFA	GRAP2	controls-state-change-of	Pathway Commons		SYK	GNG4	controls-state-change-of	Pathway Commons		ICOS	TXK	controls-state-change-of	Pathway Commons		GRB2	TFG	controls-state-change-of	Pathway Commons		AXL	AKT2	controls-state-change-of	Pathway Commons		PDGFRA	CPSF6	controls-state-change-of	Pathway Commons		EPOR	INPP5J	catalysis-precedes	Pathway Commons
FN1	IGLV3-1	controls-state-change-of	Pathway Commons		SH2D2A	GRAP2	controls-state-change-of	Pathway Commons		BCR	VAV3	controls-state-change-of	Pathway Commons		FRS2	NCK1	controls-state-change-of	Pathway Commons		HBEGF	ABI1	controls-state-change-of	Pathway Commons		B2M	DAPP1	controls-state-change-of	Pathway Commons		GAB3	CYFIP2	controls-state-change-of	Pathway Commons		CD247	PLCG1	controls-state-change-of	Pathway Commons
GNG3	IGHV3-9	controls-state-change-of	Pathway Commons		FCGR1A	IGHG2	controls-state-change-of	Pathway Commons		GNB5	VAV2	controls-state-change-of	Pathway Commons		PIK3AP1	DAPP1	controls-state-change-of	Pathway Commons		LYN	FGFR1OP2	controls-state-change-of	Pathway Commons		INPP5D	MDK	controls-state-change-of	Pathway Commons		GNB5	LAT2	controls-state-change-of	Pathway Commons		SH2D2A	PTN	controls-state-change-of	Pathway Commons
FGF1	IGHV1-2	controls-state-change-of	Pathway Commons		PIP4K2A	CD28	catalysis-precedes	Pathway Commons		GNG2	BRK1	controls-state-change-of	Pathway Commons		CDC37	TXK	controls-state-change-of	Pathway Commons		ZMYM2	NCKAP1L	controls-state-change-of	Pathway Commons		PIP5K1A	STAT1	catalysis-precedes	Pathway Commons		ZMYM2	SH3KBP1	controls-state-change-of	Pathway Commons		FGF18	CD79A	controls-state-change-of	Pathway Commons
IGHV3-30	ITK	controls-state-change-of	Pathway Commons		KIT	IGLV3-19	controls-state-change-of	Pathway Commons		KITLG	FGF2	controls-state-change-of	Pathway Commons		TRAT1	RAC1	controls-state-change-of	Pathway Commons		IDH2	GLUD1	catalysis-precedes	Pathway Commons		IRAK1	VAV1	controls-state-change-of	Pathway Commons		IGHG3	RAC1	controls-state-change-of	Pathway Commons		PIP4K2B	PDGFRB	catalysis-precedes	Pathway Commons
IGHG4	IGLV1-47	controls-state-change-of	Pathway Commons		RAC2	IGKV3-20	controls-state-change-of	Pathway Commons		EREG	LCK	controls-state-change-of	Pathway Commons		TYROBP	ATIC	controls-state-change-of	Pathway Commons		FCGR3A	GNB1	controls-state-change-of	Pathway Commons		INPP5D	FCGR3A	controls-state-change-of	Pathway Commons		GAB2	FGF20	controls-state-change-of	Pathway Commons		EPOR	FGF2	controls-state-change-of	Pathway Commons
IGLV6-57	FGFR4	controls-state-change-of	Pathway Commons		FCGR2A	IGHV3-7	controls-state-change-of	Pathway Commons		SYK	BAIAP2	controls-state-change-of	Pathway Commons		PIK3R4	TFG	controls-state-change-of	Pathway Commons		HBEGF	CUX1	controls-state-change-of	Pathway Commons		AXL	GNB1	controls-state-change-of	Pathway Commons		JAK2	LAT	controls-state-change-of	Pathway Commons		FCGR2A	FCGR3A	controls-state-change-of	Pathway Commons
EPOR	IGHV1-69	controls-state-change-of	Pathway Commons		JAK2	GNG7	controls-state-change-of	Pathway Commons		BCR	LCP2	controls-state-change-of	Pathway Commons		JAK2	AKT3	controls-state-change-of	Pathway Commons		GLUD1	ACO2	catalysis-precedes	Pathway Commons		FCGR2A	INPPL1	catalysis-precedes	Pathway Commons		PIK3CB	VAV1	controls-state-change-of	Pathway Commons		AREG	GNG12	controls-state-change-of	Pathway Commons
CD247	IGHV4-39	controls-state-change-of	Pathway Commons		IRAK4	AKT3	controls-state-change-of	Pathway Commons		STAT3	GNG2	controls-state-change-of	Pathway Commons		ACLY	MDH1	catalysis-precedes	Pathway Commons		PIP4K2A	IL1RAP	catalysis-precedes	Pathway Commons		FCGR2A	GNB1	controls-state-change-of	Pathway Commons		PTN	IGLC2	controls-state-change-of	Pathway Commons		TRAF6	CD79B	controls-state-change-of	Pathway Commons
AREG	CD80	controls-state-change-of	Pathway Commons		FCGR2A	ITK	controls-state-change-of	Pathway Commons		STAT1	GNB2	controls-state-change-of	Pathway Commons		B2M	PLCG2	controls-state-change-of	Pathway Commons		ANAPC16	UBE2D1	in-complex-with	Pathway Commons		TYROBP	PTN	controls-state-change-of	Pathway Commons		NTRK3	GNG10	controls-state-change-of	Pathway Commons		FGF7	MYO18A	controls-state-change-of	Pathway Commons
FCGR1A	FGFR1	controls-state-change-of	Pathway Commons		PIK3R1	LAT2	controls-state-change-of	Pathway Commons		FN1	FCGR1A	controls-state-change-of	Pathway Commons		ZMYM2	FYN	controls-state-change-of	Pathway Commons		IL1RAP	ABI1	controls-state-change-of	Pathway Commons		EREG	SYK	controls-state-change-of	Pathway Commons		CD28	SHC1	controls-state-change-of	Pathway Commons		GRAP2	INPP5J	catalysis-precedes	Pathway Commons
FLT3	IGHV1-2	controls-state-change-of	Pathway Commons		GRAP2	AKT3	controls-state-change-of	Pathway Commons		FN1	PLCG2	controls-state-change-of	Pathway Commons		B2M	ERLIN2	controls-state-change-of	Pathway Commons		NPM1	LAT2	controls-state-change-of	Pathway Commons		CPSF6	MDK	controls-state-change-of	Pathway Commons		FGF20	BTK	controls-state-change-of	Pathway Commons		PTN	FGF10	controls-state-change-of	Pathway Commons
IGHG4	IGLC1	controls-state-change-of	Pathway Commons		IGKV1-12	AKT2	controls-state-change-of	Pathway Commons		PLCG2	FGFR3	controls-state-change-of	Pathway Commons		CNTRL	AKT2	controls-state-change-of	Pathway Commons		NPM1	LCP2	controls-state-change-of	Pathway Commons		MDK	CD3G	controls-state-change-of	Pathway Commons		LYN	INPP5K	catalysis-precedes	Pathway Commons		KLRK1	CD247	controls-state-change-of	Pathway Commons
CD28	LCP2	controls-state-change-of	Pathway Commons		CD86	PLCG2	controls-state-change-of	Pathway Commons		GNB4	FGFR3	controls-state-change-of	Pathway Commons		HCK	TXK	controls-state-change-of	Pathway Commons		HADHA	CS	catalysis-precedes	Pathway Commons		PIP4K2A	DCTN1	catalysis-precedes	Pathway Commons		STAT1	NCK1	controls-state-change-of	Pathway Commons		TRAF6	CD247	controls-state-change-of	Pathway Commons
GRAP2	IGHG1	controls-state-change-of	Pathway Commons		GAB3	KLB	controls-state-change-of	Pathway Commons		CD86	BAIAP2	controls-state-change-of	Pathway Commons		TRIM24	GNB1	controls-state-change-of	Pathway Commons		HSP90AA1	GNB2	controls-state-change-of	Pathway Commons		SHC1	CD79B	controls-state-change-of	Pathway Commons		CBL	GNG7	controls-state-change-of	Pathway Commons		IRS1	FGF7	controls-state-change-of	Pathway Commons
IGHG3	IGLV3-25	controls-state-change-of	Pathway Commons		IGHV3-30	VAV1	controls-state-change-of	Pathway Commons		IRAK1	GNG2	controls-state-change-of	Pathway Commons		CLTC	FYN	controls-state-change-of	Pathway Commons		KIF5B	CD86	controls-state-change-of	Pathway Commons		VEGFA	LRRFIP1	controls-state-change-of	Pathway Commons		TREM2	LAT2	controls-state-change-of	Pathway Commons		EREG	GNB5	controls-state-change-of	Pathway Commons
IGLV1-47	CD86	controls-state-change-of	Pathway Commons		IGLC7	FGFR1OP2	controls-state-change-of	Pathway Commons		IRS2	KRAS	controls-state-change-of	Pathway Commons		GNB1	GRAP2	controls-state-change-of	Pathway Commons		EML4	GNB1	controls-state-change-of	Pathway Commons		FLT3LG	NCK1	controls-state-change-of	Pathway Commons		GNG11	PLCG2	controls-state-change-of	Pathway Commons		MET	GRAP2	controls-state-change-of	Pathway Commons
IGKV3-20	GNG4	controls-state-change-of	Pathway Commons		KLRD1	GNG11	controls-state-change-of	Pathway Commons		NTRK3	BAIAP2	controls-state-change-of	Pathway Commons		FLT3LG	INPP5K	catalysis-precedes	Pathway Commons		PIP4K2A	STAT3	catalysis-precedes	Pathway Commons		CD3G	GAB2	controls-state-change-of	Pathway Commons		CBL	FGF7	controls-state-change-of	Pathway Commons		CSF1R	MYO18A	controls-state-change-of	Pathway Commons
IGLV1-51	BTK	controls-state-change-of	Pathway Commons		EREG	IGHG3	controls-state-change-of	Pathway Commons		MYD88	CD247	controls-state-change-of	Pathway Commons		PIK3CD	TRIM24	controls-state-change-of	Pathway Commons		SDHB	NDUFA1	catalysis-precedes	Pathway Commons		MYO18A	NRAS	controls-state-change-of	Pathway Commons		SHC1	GNB3	controls-state-change-of	Pathway Commons		PIP4K2B	IRS1	catalysis-precedes	Pathway Commons
KLRK1	IGHV3-48	controls-state-change-of	Pathway Commons		IGLV3-19	LCK	controls-state-change-of	Pathway Commons		CSF1R	CD86	controls-state-change-of	Pathway Commons		FKBP1A	TGFBR1	in-complex-with	Pathway Commons		CLTC	LRRFIP1	controls-state-change-of	Pathway Commons		SH2D2A	VAV1	controls-state-change-of	Pathway Commons		HGF	INPP5K	catalysis-precedes	Pathway Commons		CD28	FGF10	controls-state-change-of	Pathway Commons
IGHG1	IGHV4-34	controls-state-change-of	Pathway Commons		PIK3R5	NCKAP1L	controls-state-change-of	Pathway Commons		MET	BRK1	controls-state-change-of	Pathway Commons		CBL	DAPP1	controls-state-change-of	Pathway Commons		MYD88	CD86	controls-state-change-of	Pathway Commons		PIP5K1A	HLA-E	catalysis-precedes	Pathway Commons		FGF20	GNGT2	controls-state-change-of	Pathway Commons		PTN	AKT2	controls-state-change-of	Pathway Commons
IGHV4-59	BTK	controls-state-change-of	Pathway Commons		GNB4	IGLC6	controls-state-change-of	Pathway Commons		PIP5K1B	PIK3AP1	catalysis-precedes	Pathway Commons		CLTC	TRIM24	controls-state-change-of	Pathway Commons		GNB2	NPM1	controls-state-change-of	Pathway Commons		KLRK1	AKT3	controls-state-change-of	Pathway Commons		ESR1	GNG11	controls-state-change-of	Pathway Commons		KLRC2	CD79A	controls-state-change-of	Pathway Commons
CD3G	IGHV1-2	controls-state-change-of	Pathway Commons		IGLV2-14	BTK	controls-state-change-of	Pathway Commons		GAB3	GNB4	controls-state-change-of	Pathway Commons		CD247	GNG7	controls-state-change-of	Pathway Commons		RAC1	TFG	controls-state-change-of	Pathway Commons		SH2D2A	AKT3	controls-state-change-of	Pathway Commons		IGHG3	FGF1	controls-state-change-of	Pathway Commons		KLRC2	MDK	controls-state-change-of	Pathway Commons
FLT3	FYN	controls-state-change-of	Pathway Commons		IGLV2-8	LAT2	controls-state-change-of	Pathway Commons		BCR	FGF2	controls-state-change-of	Pathway Commons		AREG	PDPK1	controls-state-change-of	Pathway Commons		UBR4	UBC	interacts-with	APPIC		CPSF6	SHC1	controls-state-change-of	Pathway Commons		EML4	GRB2	controls-state-change-of	Pathway Commons		PDGFA	CD79A	controls-state-change-of	Pathway Commons
CD80	IGLC7	controls-state-change-of	Pathway Commons		GNG10	WASF2	controls-state-change-of	Pathway Commons		FGF2	GNG12	controls-state-change-of	Pathway Commons		PIP4K2A	EPOR	catalysis-precedes	Pathway Commons		RAC1	GNB2	controls-state-change-of	Pathway Commons		CNTRL	CD79B	controls-state-change-of	Pathway Commons		FGF1	SHC1	controls-state-change-of	Pathway Commons		PDGFA	GRAP2	controls-state-change-of	Pathway Commons
IGLV1-51	LCP2	controls-state-change-of	Pathway Commons		KLRD1	IGLV1-51	controls-state-change-of	Pathway Commons		FCGR1A	BTK	controls-state-change-of	Pathway Commons		CLTC	SOS1	controls-state-change-of	Pathway Commons		KIF5B	LCP2	controls-state-change-of	Pathway Commons		FCGR3A	FYN	controls-state-change-of	Pathway Commons		FCGR1A	FGFR1	controls-state-change-of	Pathway Commons		PDGFRA	CD28	controls-state-change-of	Pathway Commons
IGLV3-25	PLCG2	controls-state-change-of	Pathway Commons		IRAK4	IGHG1	controls-state-change-of	Pathway Commons		TREM2	BLNK	controls-state-change-of	Pathway Commons		CD3G	VAV3	controls-state-change-of	Pathway Commons		HSP90AA1	CD86	controls-state-change-of	Pathway Commons		PTN	FYN	controls-state-change-of	Pathway Commons		GAB3	ZMYM2	controls-state-change-of	Pathway Commons		ERBB2	GNB5	controls-state-change-of	Pathway Commons
EPGN	IGHV3-7	controls-state-change-of	Pathway Commons		GNGT2	CD247	controls-state-change-of	Pathway Commons		PIK3AP1	BLNK	controls-state-change-of	Pathway Commons		IRS2	TFG	controls-state-change-of	Pathway Commons		PIP4K2A	NPM1	catalysis-precedes	Pathway Commons		EML4	NCKAP1L	controls-state-change-of	Pathway Commons		CD28	LCP2	controls-state-change-of	Pathway Commons		EREG	CD79B	controls-state-change-of	Pathway Commons
EPOR	IGKV1D-39	controls-state-change-of	Pathway Commons		FYN	IGHV3-33	controls-state-change-of	Pathway Commons		STAT1	BAIAP2	controls-state-change-of	Pathway Commons		FLT3	FCGR3A	controls-state-change-of	Pathway Commons		CPSF6	RAC1	controls-state-change-of	Pathway Commons		STAT1	LAT2	controls-state-change-of	Pathway Commons		JAK2	SYK	controls-state-change-of	Pathway Commons		GNG12	FGF18	controls-state-change-of	Pathway Commons
IGLV2-23	FGF7	controls-state-change-of	Pathway Commons		TRAF6	IGLV2-14	controls-state-change-of	Pathway Commons		PIK3AP1	LAT2	controls-state-change-of	Pathway Commons		LCK	GNG2	controls-state-change-of	Pathway Commons		KIF5B	ABI1	controls-state-change-of	Pathway Commons		FYN	LRRFIP1	controls-state-change-of	Pathway Commons		EML4	PLCG2	controls-state-change-of	Pathway Commons		TRAT1	FGFR4	controls-state-change-of	Pathway Commons
FCGR1A	IGHV3-33	controls-state-change-of	Pathway Commons		FLT3LG	IGKV4-1	controls-state-change-of	Pathway Commons		IRS2	SYK	controls-state-change-of	Pathway Commons		CBL	CDC37	in-complex-with	Pathway Commons		IRAK1	GNB1	controls-state-change-of	Pathway Commons		HSP90AA1	MDK	controls-state-change-of	Pathway Commons		AXL	GNG10	controls-state-change-of	Pathway Commons		TRAF6	LCK	controls-state-change-of	Pathway Commons
CD3G	IGKV2-29	controls-state-change-of	Pathway Commons		EREG	KLB	controls-state-change-of	Pathway Commons		LAT2	BTK	controls-state-change-of	Pathway Commons		EML4	SH3KBP1	controls-state-change-of	Pathway Commons		STAT3	GNB1	controls-state-change-of	Pathway Commons		DVL2	ERBB3	catalysis-precedes	Pathway Commons		ME1	NQO1	catalysis-precedes	Pathway Commons		FGFR2	CD3G	controls-state-change-of	Pathway Commons
CD28	IGHV3-23	controls-state-change-of	Pathway Commons		DCTN1	IGHV3-7	controls-state-change-of	Pathway Commons		CD86	GNB2	controls-state-change-of	Pathway Commons		CDC37	GNB1	controls-state-change-of	Pathway Commons		FCGR3A	WASF2	controls-state-change-of	Pathway Commons		IRAK4	LRRFIP1	controls-state-change-of	Pathway Commons		GRAP2	IGHG1	controls-state-change-of	Pathway Commons		PIK3R1	CYFIP2	controls-state-change-of	Pathway Commons
ICOS	IGHV2-5	controls-state-change-of	Pathway Commons		MDK	IGLV7-43	controls-state-change-of	Pathway Commons		HSP90AA1	WASF2	controls-state-change-of	Pathway Commons		JAK2	SH3KBP1	controls-state-change-of	Pathway Commons		RHOG	GNB2	controls-state-change-of	Pathway Commons		HCK	CNTRL	controls-state-change-of	Pathway Commons		PDGFB	GNG11	controls-state-change-of	Pathway Commons		SH2D2A	FGFR1	controls-state-change-of	Pathway Commons
FN1	IGKV1-39	controls-state-change-of	Pathway Commons		MDK	IGLV3-1	controls-state-change-of	Pathway Commons		GNB2	LCP2	controls-state-change-of	Pathway Commons		DLD	CS	catalysis-precedes	Pathway Commons		CDC37	ZMYM2	controls-state-change-of	Pathway Commons		PIK3R5	CD86	controls-state-change-of	Pathway Commons		PIK3R3	GAB2	controls-state-change-of	Pathway Commons		KLRD1	AKT2	controls-state-change-of	Pathway Commons
EPOR	IGLC1	controls-state-change-of	Pathway Commons		PIK3AP1	PLCG2	controls-state-change-of	Pathway Commons		HBEGF	CD86	controls-state-change-of	Pathway Commons		FYN	TRIM24	controls-state-change-of	Pathway Commons		EREG	KRAS	controls-state-change-of	Pathway Commons		GNB1	LAT2	controls-state-change-of	Pathway Commons		LYN	GNB5	controls-state-change-of	Pathway Commons		HCK	CYFIP2	controls-state-change-of	Pathway Commons
MYD88	FCGR1A	controls-state-change-of	Pathway Commons		STAT1	CD247	controls-state-change-of	Pathway Commons		LCK	GNB4	controls-state-change-of	Pathway Commons		PIK3C3	LCK	controls-state-change-of	Pathway Commons		HBEGF	FGFR1OP2	controls-state-change-of	Pathway Commons		EML4	FCGR1A	controls-state-change-of	Pathway Commons		PIK3CG	ZMYM2	controls-state-change-of	Pathway Commons		KLRK1	FCGR2A	controls-state-change-of	Pathway Commons
IGKC	FGFR1	controls-state-change-of	Pathway Commons		IGKC	CYFIP2	controls-state-change-of	Pathway Commons		JAK2	FGF20	controls-state-change-of	Pathway Commons		STAT1	ABI2	controls-state-change-of	Pathway Commons		RAC1	CD86	controls-state-change-of	Pathway Commons		HLA-E	NCKAP1	controls-state-change-of	Pathway Commons		TRAF6	LAT2	controls-state-change-of	Pathway Commons		TRAT1	GNG12	controls-state-change-of	Pathway Commons
GNG3	IGHV3-33	controls-state-change-of	Pathway Commons		PIP4K2A	IGKV3-11	catalysis-precedes	Pathway Commons		GNB5	WASF2	controls-state-change-of	Pathway Commons		ERLIN2	ITK	controls-state-change-of	Pathway Commons		RHOG	BAIAP2	controls-state-change-of	Pathway Commons		CD3G	BTK	controls-state-change-of	Pathway Commons		DVL1	FCGR2A	catalysis-precedes	Pathway Commons		KLRC2	BAIAP2	controls-state-change-of	Pathway Commons
CD86	IGHV1-2	controls-state-change-of	Pathway Commons		EREG	ALKAL2	controls-state-change-of	Pathway Commons		FGF20	BLNK	controls-state-change-of	Pathway Commons		GNG7	INPP5K	catalysis-precedes	Pathway Commons		ANAPC16	UBE2E1	in-complex-with	Pathway Commons		PIP5K1B	CBL	catalysis-precedes	Pathway Commons		HSP90AA1	IGHG3	controls-state-change-of	Pathway Commons		SH2D2A	CD28	controls-state-change-of	Pathway Commons
VAV1	IGHV1-2	controls-state-change-of	Pathway Commons		IGKV1-5	FGFR1	controls-state-change-of	Pathway Commons		PIK3AP1	CD247	controls-state-change-of	Pathway Commons		PIK3CG	GRAP2	controls-state-change-of	Pathway Commons		EML4	GNB2	controls-state-change-of	Pathway Commons		BAG4	IGHD	controls-state-change-of	Pathway Commons		GAB3	GNG7	controls-state-change-of	Pathway Commons		IRAK4	INPP5J	catalysis-precedes	Pathway Commons
IGHV4-34	LCK	controls-state-change-of	Pathway Commons		IRAK4	BTK	controls-state-change-of	Pathway Commons		FGFR3	VAV2	controls-state-change-of	Pathway Commons		FLT3LG	CD3G	controls-state-change-of	Pathway Commons		PIP4K2A	RAC1	catalysis-precedes	Pathway Commons		DVL2	CD247	catalysis-precedes	Pathway Commons		FN1	CPSF6	controls-state-change-of	Pathway Commons		ERBB2	CD79B	controls-state-change-of	Pathway Commons
ERLIN2	FYN	controls-state-change-of	Pathway Commons		GNB5	ALKAL2	controls-state-change-of	Pathway Commons		PIK3R4	BAIAP2	controls-state-change-of	Pathway Commons		ICOS	ATIC	controls-state-change-of	Pathway Commons		ETV6	NRAS	controls-state-change-of	Pathway Commons		IL33	LCP2	controls-state-change-of	Pathway Commons		STRN	PLCG2	controls-state-change-of	Pathway Commons		MYO18A	FGF7	controls-state-change-of	Pathway Commons
FYN	LAT2	controls-state-change-of	Pathway Commons		RHOG	IGHD	controls-state-change-of	Pathway Commons		DGAT1	ACLY	catalysis-precedes	Pathway Commons		LCK	CNTRL	controls-state-change-of	Pathway Commons		HLA-E	WASF2	controls-state-change-of	Pathway Commons		PIK3CG	SYK	controls-state-change-of	Pathway Commons		FGF7	RAC1	controls-state-change-of	Pathway Commons		CSF1	LCK	controls-state-change-of	Pathway Commons
TREM2	IGHV4-39	controls-state-change-of	Pathway Commons		KDR	IGHM	controls-state-change-of	Pathway Commons		PIK3R4	GNG2	controls-state-change-of	Pathway Commons		PIP4K2A	KLRK1	catalysis-precedes	Pathway Commons		NPM1	CD86	controls-state-change-of	Pathway Commons		B2M	MYO18A	controls-state-change-of	Pathway Commons		SHC1	PLCG2	controls-state-change-of	Pathway Commons		MDK	LAT	controls-state-change-of	Pathway Commons
FCGR2A	IGKV2-30	controls-state-change-of	Pathway Commons		PLCG2	INPP5K	catalysis-precedes	Pathway Commons		HLA-E	VAV3	controls-state-change-of	Pathway Commons		RAC1	CD3G	controls-state-change-of	Pathway Commons		RAC2	GNB1	controls-state-change-of	Pathway Commons		FGF2	FCGR3A	controls-state-change-of	Pathway Commons		PIK3CB	CD3G	controls-state-change-of	Pathway Commons		THOC5	MYO18A	controls-state-change-of	Pathway Commons
PIK3R6	CD86	controls-state-change-of	Pathway Commons		IGHV4-59	CYFIP2	controls-state-change-of	Pathway Commons		XPO1	ALKBH5	in-complex-with	Pathway Commons		GRAP2	SOS1	controls-state-change-of	Pathway Commons		SDHB	SDHC	in-complex-with	Pathway Commons		PIK3AP1	CPSF6	controls-state-change-of	Pathway Commons		MYD88	FCGR1A	controls-state-change-of	Pathway Commons		UBE2S	UBE2C	in-complex-with	Pathway Commons
VAV1	FGFR4	controls-state-change-of	Pathway Commons		VAV1	IGHG4	controls-state-change-of	Pathway Commons		IL34	GNB2	controls-state-change-of	Pathway Commons		ICOS	ERLIN2	controls-state-change-of	Pathway Commons		TYROBP	NPM1	controls-state-change-of	Pathway Commons		PIP4K2A	GNG7	catalysis-precedes	Pathway Commons		NTRK3	INPP5D	catalysis-precedes	Pathway Commons		KITLG	GNG12	controls-state-change-of	Pathway Commons
GAB3	IGHV3-33	controls-state-change-of	Pathway Commons		CD19	INPP5D	catalysis-precedes	Pathway Commons		CD247	INPP5D	catalysis-precedes	Pathway Commons		MYD88	GRAP2	controls-state-change-of	Pathway Commons		HBEGF	GNB1	controls-state-change-of	Pathway Commons		PIP5K1B	AXL	catalysis-precedes	Pathway Commons		IGKC	FGFR1	controls-state-change-of	Pathway Commons		PIK3CG	FGFR4	controls-state-change-of	Pathway Commons
GNG3	LAT2	controls-state-change-of	Pathway Commons		CD19	IGLV7-43	controls-state-change-of	Pathway Commons		PLCG2	BTK	controls-state-change-of	Pathway Commons		PIK3CD	SHC1	controls-state-change-of	Pathway Commons		CPSF6	RHOA	controls-state-change-of	Pathway Commons		PIP4K2A	VEGFA	catalysis-precedes	Pathway Commons		NTRK3	CPSF6	controls-state-change-of	Pathway Commons		TRAF6	BAIAP2	controls-state-change-of	Pathway Commons
TRAT1	IGHV3-11	controls-state-change-of	Pathway Commons		AREG	AKT3	controls-state-change-of	Pathway Commons		AXL	FGF20	controls-state-change-of	Pathway Commons		SH2D2A	SHC1	controls-state-change-of	Pathway Commons		CPSF6	LCP2	controls-state-change-of	Pathway Commons		PIP4K2A	FGFR1OP2	catalysis-precedes	Pathway Commons		ESR1	CYFIP1	controls-state-change-of	Pathway Commons		HBEGF	MYO18A	controls-state-change-of	Pathway Commons
FCGR3A	IGHV4-39	controls-state-change-of	Pathway Commons		MYO18A	INPP5D	catalysis-precedes	Pathway Commons		CS	ACSS3	catalysis-precedes	Pathway Commons		CNTRL	NCK1	controls-state-change-of	Pathway Commons		STAT1	GNG5	controls-state-change-of	Pathway Commons		THOC5	AKT3	controls-state-change-of	Pathway Commons		GNB4	INPP5D	catalysis-precedes	Pathway Commons		VEGFA	MYO18A	controls-state-change-of	Pathway Commons
ERLIN2	IGLV3-19	controls-state-change-of	Pathway Commons		VAV1	LAT	controls-state-change-of	Pathway Commons		FGF20	CD247	controls-state-change-of	Pathway Commons		FRS2	CD247	controls-state-change-of	Pathway Commons		NPM1	RHOA	controls-state-change-of	Pathway Commons		GNG7	PLCG1	controls-state-change-of	Pathway Commons		PIK3CG	SH3KBP1	controls-state-change-of	Pathway Commons		ERBB3	FGFR1	controls-state-change-of	Pathway Commons
GNG4	CD86	controls-state-change-of	Pathway Commons		KDR	MYO18A	controls-state-change-of	Pathway Commons		CSF1	GNB5	controls-state-change-of	Pathway Commons		TRAF6	SYK	controls-state-change-of	Pathway Commons		PIP4K2A	HSP90AA1	catalysis-precedes	Pathway Commons		DCTN1	LRRFIP1	controls-state-change-of	Pathway Commons		FLT3LG	PLCG2	controls-state-change-of	Pathway Commons		TRAT1	FGF10	controls-state-change-of	Pathway Commons
CD28	IGHV4-39	controls-state-change-of	Pathway Commons		FLT3LG	IGLV3-1	controls-state-change-of	Pathway Commons		INPP5D	GNG12	controls-state-change-of	Pathway Commons		MDH1	GOT2	catalysis-precedes	Pathway Commons		CLTC	NPM1	controls-state-change-of	Pathway Commons		IRAK4	MDK	controls-state-change-of	Pathway Commons		RAC2	SH3KBP1	controls-state-change-of	Pathway Commons		FGFR2	CD79B	controls-state-change-of	Pathway Commons
FN1	CD28	controls-state-change-of	Pathway Commons		FGFR1OP2	CYFIP2	controls-state-change-of	Pathway Commons		SHC3	KRAS	controls-state-change-of	Pathway Commons		PIP4K2A	PIK3CA	catalysis-precedes	Pathway Commons		LAT2	GNB1	controls-state-change-of	Pathway Commons		PIK3R5	LAT2	controls-state-change-of	Pathway Commons		RHOG	NCKAP1L	controls-state-change-of	Pathway Commons		PIK3CG	CYFIP2	controls-state-change-of	Pathway Commons
IGHV3-9	ITK	controls-state-change-of	Pathway Commons		LCK	IGLC6	controls-state-change-of	Pathway Commons		KITLG	INPP5D	catalysis-precedes	Pathway Commons		TRIM24	SOS1	controls-state-change-of	Pathway Commons		FGFR1OP2	TFG	controls-state-change-of	Pathway Commons		DCTN1	FYN	controls-state-change-of	Pathway Commons		GAB2	FCGR1A	controls-state-change-of	Pathway Commons		KIT	CD28	controls-state-change-of	Pathway Commons
PLCG2	IGLV3-1	controls-state-change-of	Pathway Commons		IGLV3-1	FGFR1OP2	controls-state-change-of	Pathway Commons		NTRK2	CD247	controls-state-change-of	Pathway Commons		PIK3R3	SYK	controls-state-change-of	Pathway Commons		FGFR1OP2	BRK1	controls-state-change-of	Pathway Commons		STAT3	MECP2	controls-state-change-of	Pathway Commons		GNB5	TEC	controls-state-change-of	Pathway Commons		PIK3CG	FGF9	controls-state-change-of	Pathway Commons
IGHV3-7	CD80	controls-state-change-of	Pathway Commons		CD3G	IGLV3-21	controls-state-change-of	Pathway Commons		IRAK1	LCK	controls-state-change-of	Pathway Commons		RAC2	ITK	controls-state-change-of	Pathway Commons		STAT3	GNG5	controls-state-change-of	Pathway Commons		TYROBP	DAPP1	controls-state-change-of	Pathway Commons		SHC1	FGF1	controls-state-change-of	Pathway Commons		MYO18A	FGF9	controls-state-change-of	Pathway Commons
GNG3	IGHV3-23	controls-state-change-of	Pathway Commons		IGLC3	DAPP1	controls-state-change-of	Pathway Commons		CSF1	LAT2	controls-state-change-of	Pathway Commons		SYK	ZMYM2	controls-state-change-of	Pathway Commons		LRRFIP1	GNG5	controls-state-change-of	Pathway Commons		PLCG2	FYN	controls-state-change-of	Pathway Commons		GRB2	FGF20	controls-state-change-of	Pathway Commons		PIK3R3	BAIAP2	controls-state-change-of	Pathway Commons
PTN	LCP2	controls-state-change-of	Pathway Commons		IGHV4-34	PLCG2	controls-state-change-of	Pathway Commons		FGF2	GNB5	controls-state-change-of	Pathway Commons		EML4	TRIM24	controls-state-change-of	Pathway Commons		AREG	NCKAP1L	controls-state-change-of	Pathway Commons		HSP90AA1	CPSF6	controls-state-change-of	Pathway Commons		FN1	CD28	controls-state-change-of	Pathway Commons		ERBB2	FGFR2	controls-state-change-of	Pathway Commons
TYROBP	IGKV1-5	controls-state-change-of	Pathway Commons		ICOS	IGHM	controls-state-change-of	Pathway Commons		EREG	BRK1	controls-state-change-of	Pathway Commons		GRAP2	NCK1	controls-state-change-of	Pathway Commons		EREG	CD86	controls-state-change-of	Pathway Commons		FN1	GNB1	controls-state-change-of	Pathway Commons		INPP5D	SHC1	controls-state-change-of	Pathway Commons		CD19	CD3G	controls-state-change-of	Pathway Commons
IL33	CD80	controls-state-change-of	Pathway Commons		IGHV3-23	DAPP1	controls-state-change-of	Pathway Commons		VEGFA	CD86	controls-state-change-of	Pathway Commons		RAC2	CYFIP2	controls-state-change-of	Pathway Commons		CLTC	GNB2	controls-state-change-of	Pathway Commons		PIP5K1B	KLRK1	catalysis-precedes	Pathway Commons		PTN	LCP2	controls-state-change-of	Pathway Commons		EREG	FGF9	controls-state-change-of	Pathway Commons
GAB3	BTK	controls-state-change-of	Pathway Commons		INPP5D	INPP5K	catalysis-precedes	Pathway Commons		FGF20	SYK	controls-state-change-of	Pathway Commons		KLRK1	CD247	controls-state-change-of	Pathway Commons		IDH3G	OAT	catalysis-precedes	Pathway Commons		HCK	IGHD	controls-state-change-of	Pathway Commons		IGHG3	GRB2	controls-state-change-of	Pathway Commons		EGFR	FGFR3	controls-state-change-of	Pathway Commons
KLRC2	IGLV3-19	controls-state-change-of	Pathway Commons		FGFR1	GRAP2	controls-state-change-of	Pathway Commons		HBEGF	WASF2	controls-state-change-of	Pathway Commons		TRIM24	ATIC	controls-state-change-of	Pathway Commons		HBEGF	KRAS	controls-state-change-of	Pathway Commons		EML4	LCP2	controls-state-change-of	Pathway Commons		CNTRL	SYK	controls-state-change-of	Pathway Commons		MDK	MYO18A	controls-state-change-of	Pathway Commons
PIK3R1	IGKV2-28	controls-state-change-of	Pathway Commons		STAT1	AKT2	controls-state-change-of	Pathway Commons		PIK3R4	GNB4	controls-state-change-of	Pathway Commons		TRAF6	CD247	controls-state-change-of	Pathway Commons		TYROBP	FCGR2A	controls-state-change-of	Pathway Commons		IL33	IGHD	controls-state-change-of	Pathway Commons		AREG	TEC	controls-state-change-of	Pathway Commons		KLRD1	MDK	controls-state-change-of	Pathway Commons
TRAT1	GNG4	controls-state-change-of	Pathway Commons		FCGR2A	IGKV1-39	controls-state-change-of	Pathway Commons		IRAK1	SYK	controls-state-change-of	Pathway Commons		EREG	GNB5	controls-state-change-of	Pathway Commons		HLA-E	RAC1	controls-state-change-of	Pathway Commons		EREG	BTK	controls-state-change-of	Pathway Commons		INPP5D	FCGR1A	controls-state-change-of	Pathway Commons		BTC	CD79A	controls-state-change-of	Pathway Commons
CD80	IGKV1-5	controls-state-change-of	Pathway Commons		IGHV3-33	CNTRL	controls-state-change-of	Pathway Commons		PC	GOT2	catalysis-precedes	Pathway Commons		GNG10	SYK	controls-state-change-of	Pathway Commons		STAT3	FGFR1OP2	controls-state-change-of	Pathway Commons		TREM2	CD79B	controls-state-change-of	Pathway Commons		CD86	GNB5	controls-state-change-of	Pathway Commons		CD3G	FGFR1	controls-state-change-of	Pathway Commons
CSF1R	CD247	controls-state-change-of	Pathway Commons		TREM2	CD3G	controls-state-change-of	Pathway Commons		VEGFA	BRK1	controls-state-change-of	Pathway Commons		IRS2	CNTRL	controls-state-change-of	Pathway Commons		GNG5	BRK1	controls-state-change-of	Pathway Commons		FGFR1	MDK	controls-state-change-of	Pathway Commons		GAB3	BTK	controls-state-change-of	Pathway Commons		GNB5	FGF2	controls-state-change-of	Pathway Commons
PDGFRB	IGLV6-57	controls-state-change-of	Pathway Commons		STAT1	CD3G	controls-state-change-of	Pathway Commons		EREG	BAIAP2	controls-state-change-of	Pathway Commons		CD28	GNB1	controls-state-change-of	Pathway Commons		TYROBP	BRK1	controls-state-change-of	Pathway Commons		KLRK1	SHC1	controls-state-change-of	Pathway Commons		RHOG	CD86	controls-state-change-of	Pathway Commons		TRAF6	GNG12	controls-state-change-of	Pathway Commons
GNG4	IGLV2-8	controls-state-change-of	Pathway Commons		FLT3LG	IGLV2-8	controls-state-change-of	Pathway Commons		PDGFB	CYFIP1	controls-state-change-of	Pathway Commons		TRAT1	SYK	controls-state-change-of	Pathway Commons		TYROBP	GRB2	controls-state-change-of	Pathway Commons		BAG4	SYK	controls-state-change-of	Pathway Commons		PIK3CB	CPSF6	controls-state-change-of	Pathway Commons		BDNF	GNG2	controls-state-change-of	Pathway Commons
EPOR	IGKV1-33	controls-state-change-of	Pathway Commons		IGHV3-23	GNG10	controls-state-change-of	Pathway Commons		JAK2	GNB5	controls-state-change-of	Pathway Commons		PTPN11	LCK	controls-state-change-of	Pathway Commons		FCGR3A	LCP2	controls-state-change-of	Pathway Commons		HSP90AA1	GAB2	controls-state-change-of	Pathway Commons		PIK3CD	CD79B	controls-state-change-of	Pathway Commons		IRS2	GNG12	controls-state-change-of	Pathway Commons
AXL	IGHG1	controls-state-change-of	Pathway Commons		NRG1	IGKV1-39	controls-state-change-of	Pathway Commons		NTRK3	VAV2	controls-state-change-of	Pathway Commons		PTPN11	GNG7	controls-state-change-of	Pathway Commons		PIP4K2A	STAT1	catalysis-precedes	Pathway Commons		PLCG2	INPP5D	catalysis-precedes	Pathway Commons		CSF1R	CD247	controls-state-change-of	Pathway Commons		MMAB	SMAD4	interacts-with	Pathway Commons
IGKV1-39	ERLIN2	controls-state-change-of	Pathway Commons		FCGR2A	IGKV3-20	controls-state-change-of	Pathway Commons		GNB5	CYFIP1	controls-state-change-of	Pathway Commons		IL1RAP	ATIC	controls-state-change-of	Pathway Commons		GNB1	CD86	controls-state-change-of	Pathway Commons		FN1	IGHD	controls-state-change-of	Pathway Commons		PIK3CG	MDK	controls-state-change-of	Pathway Commons		CSF1	CD247	controls-state-change-of	Pathway Commons
ERLIN2	IGHV3-7	controls-state-change-of	Pathway Commons		PIK3R1	GAB1	controls-state-change-of	Pathway Commons		FCGR2A	GNB4	controls-state-change-of	Pathway Commons		IL1RAP	ZMYM2	controls-state-change-of	Pathway Commons		IRS2	SH3KBP1	controls-state-change-of	Pathway Commons		MYO18A	SHC1	controls-state-change-of	Pathway Commons		TREM2	GNB5	controls-state-change-of	Pathway Commons		FGF2	SOS1	controls-state-change-of	Pathway Commons
CD80	IGHV4-59	controls-state-change-of	Pathway Commons		VEGFA	MDK	controls-state-change-of	Pathway Commons		GNG2	TRIM24	controls-state-change-of	Pathway Commons		ZMYM2	GNG10	controls-state-change-of	Pathway Commons		CSF1R	NCKAP1L	controls-state-change-of	Pathway Commons		PTN	GNB1	controls-state-change-of	Pathway Commons		AXL	IGHG1	controls-state-change-of	Pathway Commons		FGF18	AKT2	controls-state-change-of	Pathway Commons
VAV1	IGLV2-8	controls-state-change-of	Pathway Commons		ESR2	IGHG3	controls-state-change-of	Pathway Commons		GCAT	SUCLG1	catalysis-precedes	Pathway Commons		HLA-E	FYN	controls-state-change-of	Pathway Commons		HLA-E	LAT2	controls-state-change-of	Pathway Commons		IRAK4	FCGR3A	controls-state-change-of	Pathway Commons		PDGFRB	GNGT2	controls-state-change-of	Pathway Commons		PIP4K2B	BTC	catalysis-precedes	Pathway Commons
CD247	ERLIN2	controls-state-change-of	Pathway Commons		MDK	IGKV4-1	controls-state-change-of	Pathway Commons		INPP5D	FGF2	controls-state-change-of	Pathway Commons		PIK3C3	CD247	controls-state-change-of	Pathway Commons		HBEGF	LAT2	controls-state-change-of	Pathway Commons		FLT3LG	ATIC	controls-state-change-of	Pathway Commons		SYK	TXK	controls-state-change-of	Pathway Commons		CD28	FGF18	controls-state-change-of	Pathway Commons
GNG2	IGKV1-5	controls-state-change-of	Pathway Commons		IGHG1	CD79A	controls-state-change-of	Pathway Commons		INPP5D	GNG2	controls-state-change-of	Pathway Commons		B2M	SOS1	controls-state-change-of	Pathway Commons		IRAK1	ZMYM2	controls-state-change-of	Pathway Commons		FN1	CD3G	controls-state-change-of	Pathway Commons		GNG7	INPP5D	catalysis-precedes	Pathway Commons		CD28	INPP5D	catalysis-precedes	Pathway Commons
IGHV2-5	LAT2	controls-state-change-of	Pathway Commons		GNB5	IGKV4-1	controls-state-change-of	Pathway Commons		JAK2	GNG2	controls-state-change-of	Pathway Commons		GOT2	L2HGDH	catalysis-precedes	Pathway Commons		TYROBP	RHOA	controls-state-change-of	Pathway Commons		MYD88	AKT3	controls-state-change-of	Pathway Commons		IGHG1	TEC	controls-state-change-of	Pathway Commons		ERBB3	FGF7	controls-state-change-of	Pathway Commons
LCK	IGHV3-48	controls-state-change-of	Pathway Commons		AXL	FCGR3A	controls-state-change-of	Pathway Commons		FCGR1A	LCK	controls-state-change-of	Pathway Commons		TRAF6	LCK	controls-state-change-of	Pathway Commons		SUCLG1	HADHA	catalysis-precedes	Pathway Commons		GNG7	FGFR1	controls-state-change-of	Pathway Commons		IGKC	GNB5	controls-state-change-of	Pathway Commons		PTN	FGF7	controls-state-change-of	Pathway Commons
VAV1	IGHV4-59	controls-state-change-of	Pathway Commons		IRS2	FGFR1OP2	controls-state-change-of	Pathway Commons		FCGR1A	LAT2	controls-state-change-of	Pathway Commons		STRN	ERLIN2	controls-state-change-of	Pathway Commons		PIK3AP1	ZMYM2	controls-state-change-of	Pathway Commons		STRN	SYK	controls-state-change-of	Pathway Commons		HGF	FGF20	controls-state-change-of	Pathway Commons		TRAF6	FGF18	controls-state-change-of	Pathway Commons
RAC2	IGKV1-5	controls-state-change-of	Pathway Commons		CD28	MDK	controls-state-change-of	Pathway Commons		HSP90AA1	BTK	controls-state-change-of	Pathway Commons		ZMYM2	TXK	controls-state-change-of	Pathway Commons		KIF5B	BAIAP2	controls-state-change-of	Pathway Commons		PIK3CG	BTK	controls-state-change-of	Pathway Commons		GNG7	CD79B	controls-state-change-of	Pathway Commons		PTN	INPP5D	catalysis-precedes	Pathway Commons
GAB3	IGKV1-33	controls-state-change-of	Pathway Commons		IGKV3-20	LAT2	controls-state-change-of	Pathway Commons		PLCG2	GNG2	controls-state-change-of	Pathway Commons		PIK3R1	CYFIP2	controls-state-change-of	Pathway Commons		IDH3B	OAT	catalysis-precedes	Pathway Commons		CD247	CNTRL	controls-state-change-of	Pathway Commons		FGF20	LCK	controls-state-change-of	Pathway Commons		TGFA	PIK3R1	in-complex-with	Pathway Commons
IL1RL1	IGLV2-11	controls-state-change-of	Pathway Commons		GNB5	IGHG2	controls-state-change-of	Pathway Commons		CSF1	TRIM24	controls-state-change-of	Pathway Commons		IL1RAP	LCK	controls-state-change-of	Pathway Commons		HCK	GNB1	controls-state-change-of	Pathway Commons		THOC5	DAPP1	controls-state-change-of	Pathway Commons		FCGR2A	GNB3	controls-state-change-of	Pathway Commons		ERBB3	CD247	controls-state-change-of	Pathway Commons
IL34	IGLV2-14	controls-state-change-of	Pathway Commons		RHOG	FGFR1	controls-state-change-of	Pathway Commons		MYD88	FCGR2A	controls-state-change-of	Pathway Commons		DCTN1	CD3G	controls-state-change-of	Pathway Commons		TYROBP	ZMYM2	controls-state-change-of	Pathway Commons		FCGR1A	NCK1	controls-state-change-of	Pathway Commons		CSF1R	SH3KBP1	controls-state-change-of	Pathway Commons		MDK	FGFR4	controls-state-change-of	Pathway Commons
GNG3	ITK	controls-state-change-of	Pathway Commons		PIK3R1	IGKV4-1	controls-state-change-of	Pathway Commons		EREG	CYFIP1	controls-state-change-of	Pathway Commons		KLRD1	AKT2	controls-state-change-of	Pathway Commons		EREG	RAC1	controls-state-change-of	Pathway Commons		LRRFIP1	PTEN	catalysis-precedes	Pathway Commons		IGHG4	CYFIP1	controls-state-change-of	Pathway Commons		IRS2	MDK	controls-state-change-of	Pathway Commons
ERLIN2	GNG3	controls-state-change-of	Pathway Commons		IGHG4	IGLC6	controls-state-change-of	Pathway Commons		LAT2	GNG12	controls-state-change-of	Pathway Commons		HCK	CYFIP2	controls-state-change-of	Pathway Commons		RAC2	GNG5	controls-state-change-of	Pathway Commons		STAT1	ATIC	controls-state-change-of	Pathway Commons		CBL	INPP5K	catalysis-precedes	Pathway Commons		EGFR	CD79A	controls-state-change-of	Pathway Commons
IGKV3-11	ITK	controls-state-change-of	Pathway Commons		FGFR1	ITK	controls-state-change-of	Pathway Commons		FCGR2A	LCK	controls-state-change-of	Pathway Commons		DCTN1	FCGR3A	controls-state-change-of	Pathway Commons		CSF1R	TFG	controls-state-change-of	Pathway Commons		SOS1	FGFR1OP2	controls-state-change-of	Pathway Commons		PIK3R3	CNTRL	controls-state-change-of	Pathway Commons		FGF9	GRAP2	controls-state-change-of	Pathway Commons
IL34	GNG3	controls-state-change-of	Pathway Commons		FGFR1OP2	WASF2	controls-state-change-of	Pathway Commons		ERBB2	FGF2	controls-state-change-of	Pathway Commons		GNG2	TFG	controls-state-change-of	Pathway Commons		CLTC	FGFR1OP2	controls-state-change-of	Pathway Commons		PIK3CB	LCK	controls-state-change-of	Pathway Commons		INPP5D	VAV1	controls-state-change-of	Pathway Commons		GNG2	LAT	controls-state-change-of	Pathway Commons
PIK3R1	IGKV2-30	controls-state-change-of	Pathway Commons		MDK	GNG11	controls-state-change-of	Pathway Commons		LYN	VAV3	controls-state-change-of	Pathway Commons		EML4	VAV3	controls-state-change-of	Pathway Commons		MYD88	NPM1	controls-state-change-of	Pathway Commons		HSP90AA1	LAT2	controls-state-change-of	Pathway Commons		CBL	IGHG1	controls-state-change-of	Pathway Commons		UBE2C	UBE2S	in-complex-with	Pathway Commons
ERLIN2	IGLV3-25	controls-state-change-of	Pathway Commons		IGLV2-8	MYO18A	controls-state-change-of	Pathway Commons		SUCLG1	ACADSB	catalysis-precedes	Pathway Commons		SH2D2A	CD28	controls-state-change-of	Pathway Commons		NDUFS7	MDH1	catalysis-precedes	Pathway Commons		GRB2	CPSF6	controls-state-change-of	Pathway Commons		GNB4	FCGR3A	controls-state-change-of	Pathway Commons		PDGFRA	GNG2	controls-state-change-of	Pathway Commons
FGFR1	IGLV3-1	controls-state-change-of	Pathway Commons		GRAP2	IGHV4-39	controls-state-change-of	Pathway Commons		PDGFB	FGF2	controls-state-change-of	Pathway Commons		IRAK4	DAPP1	controls-state-change-of	Pathway Commons		LYN	CPSF6	controls-state-change-of	Pathway Commons		LRRFIP1	CD79B	controls-state-change-of	Pathway Commons		GNG10	CD3G	controls-state-change-of	Pathway Commons		EREG	FGF10	controls-state-change-of	Pathway Commons
IGHV3-9	ERLIN2	controls-state-change-of	Pathway Commons		GNG7	IGHG4	controls-state-change-of	Pathway Commons		INPP5D	BTK	controls-state-change-of	Pathway Commons		PIK3R3	SH3KBP1	controls-state-change-of	Pathway Commons		GRB2	LRRFIP1	controls-state-change-of	Pathway Commons		FGFR1OP2	GNB1	controls-state-change-of	Pathway Commons		PIK3R1	HBEGF	in-complex-with	Pathway Commons		IRAK4	SOS1	controls-state-change-of	Pathway Commons
IGHV3-7	FYN	controls-state-change-of	Pathway Commons		CD86	IGLV2-11	controls-state-change-of	Pathway Commons		ACLY	DGAT1	catalysis-precedes	Pathway Commons		CDC37	TFG	controls-state-change-of	Pathway Commons		RAC1	LAT2	controls-state-change-of	Pathway Commons		CNTRL	SHC1	controls-state-change-of	Pathway Commons		SYK	CPSF6	controls-state-change-of	Pathway Commons		PIK3R1	FGFR1	controls-state-change-of	Pathway Commons
CD80	IGHG4	controls-state-change-of	Pathway Commons		IGLV1-51	GNG2	controls-state-change-of	Pathway Commons		HBEGF	TRIM24	controls-state-change-of	Pathway Commons		PIK3CG	CYFIP2	controls-state-change-of	Pathway Commons		MYD88	CUX1	controls-state-change-of	Pathway Commons		PIK3CD	CD86	controls-state-change-of	Pathway Commons		CNTRL	AKT3	controls-state-change-of	Pathway Commons		FLT3LG	INPP5D	catalysis-precedes	Pathway Commons
PIK3R6	IGLC2	controls-state-change-of	Pathway Commons		NRG1	MYO18A	controls-state-change-of	Pathway Commons		GAB3	BRK1	controls-state-change-of	Pathway Commons		PIK3R1	TRIM24	controls-state-change-of	Pathway Commons		EREG	TFG	controls-state-change-of	Pathway Commons		FLT3LG	AKT2	controls-state-change-of	Pathway Commons		RAC2	FCGR3A	controls-state-change-of	Pathway Commons		HBEGF	FCGR3A	controls-state-change-of	Pathway Commons
EPGN	IGKV3-15	controls-state-change-of	Pathway Commons		PIK3AP1	IGLV2-8	controls-state-change-of	Pathway Commons		NTRK2	PLCG2	controls-state-change-of	Pathway Commons		STRN	SH3KBP1	controls-state-change-of	Pathway Commons		IRAK1	LRRFIP1	controls-state-change-of	Pathway Commons		SHC1	LCK	controls-state-change-of	Pathway Commons		CD86	CYFIP1	controls-state-change-of	Pathway Commons		ERBB3	FGF10	controls-state-change-of	Pathway Commons
IGLV3-25	ERLIN2	controls-state-change-of	Pathway Commons		IGKV3-11	FGFR1	controls-state-change-of	Pathway Commons		GNB2	FGF2	controls-state-change-of	Pathway Commons		TRAT1	SH3KBP1	controls-state-change-of	Pathway Commons		MDH1	CS	catalysis-precedes	Pathway Commons		IGKC	GAB2	controls-state-change-of	Pathway Commons		DVL1	IGLC2	catalysis-precedes	Pathway Commons		CD19	FGFR4	controls-state-change-of	Pathway Commons
GRAP2	IGLV1-51	controls-state-change-of	Pathway Commons		LYN	IGHM	controls-state-change-of	Pathway Commons		IRS2	GNG4	controls-state-change-of	Pathway Commons		HCK	ATIC	controls-state-change-of	Pathway Commons		EREG	NCKAP1L	controls-state-change-of	Pathway Commons		THOC5	PLCG2	controls-state-change-of	Pathway Commons		STAT1	FCGR2A	controls-state-change-of	Pathway Commons		KITLG	PIK3R3	in-complex-with	Pathway Commons
IGHV1-69	GNG2	controls-state-change-of	Pathway Commons		CD19	IGLV2-11	controls-state-change-of	Pathway Commons		KITLG	GNG2	controls-state-change-of	Pathway Commons		RAC2	AKT2	controls-state-change-of	Pathway Commons		IRS2	ABI1	controls-state-change-of	Pathway Commons		INPPL1	INPP5D	catalysis-precedes	Pathway Commons		PIP4K2A	HCK	catalysis-precedes	Pathway Commons		FGFR4	FGFR1	controls-state-change-of	Pathway Commons
RAC2	FCGR3A	controls-state-change-of	Pathway Commons		IGHG2	GAB1	controls-state-change-of	Pathway Commons		HLA-E	BTK	controls-state-change-of	Pathway Commons		PIK3R4	CYFIP2	controls-state-change-of	Pathway Commons		CSF1R	CPSF6	controls-state-change-of	Pathway Commons		SOS1	IGKC	controls-state-change-of	Pathway Commons		GNG2	FCGR1A	controls-state-change-of	Pathway Commons		HGF	GNG11	controls-state-change-of	Pathway Commons
IL33	TXK	controls-state-change-of	Pathway Commons		CNTRL	GNGT2	controls-state-change-of	Pathway Commons		TRIM24	GNB4	controls-state-change-of	Pathway Commons		FLT3LG	PDPK1	controls-state-change-of	Pathway Commons		GNB1	RHOA	controls-state-change-of	Pathway Commons		LYN	NCK1	controls-state-change-of	Pathway Commons		RHOG	FGF20	controls-state-change-of	Pathway Commons		GNG12	CD247	controls-state-change-of	Pathway Commons
LAT2	IGLV6-57	controls-state-change-of	Pathway Commons		GNGT2	CD3G	controls-state-change-of	Pathway Commons		PIP5K1B	INPP5D	catalysis-precedes	Pathway Commons		CBL	GNG10	controls-state-change-of	Pathway Commons		ZMYM2	GRB2	controls-state-change-of	Pathway Commons		PIP5K1A	GRB2	catalysis-precedes	Pathway Commons		IGHG2	CPSF6	controls-state-change-of	Pathway Commons		EPOR	CD28	controls-state-change-of	Pathway Commons
FCGR3A	IGKV3-15	controls-state-change-of	Pathway Commons		IGHG3	IGLV2-8	controls-state-change-of	Pathway Commons		LCK	FCGR2A	controls-state-change-of	Pathway Commons		STAT1	GNG10	controls-state-change-of	Pathway Commons		PIP4K2A	LRRFIP1	catalysis-precedes	Pathway Commons		MYD88	DAPP1	controls-state-change-of	Pathway Commons		FGF7	IGLC2	controls-state-change-of	Pathway Commons		PDGFRA	GRAP2	controls-state-change-of	Pathway Commons
CD28	IGLV1-47	controls-state-change-of	Pathway Commons		CD86	IGKV1-5	controls-state-change-of	Pathway Commons		JAK2	FCGR2A	controls-state-change-of	Pathway Commons		SHC1	CD247	controls-state-change-of	Pathway Commons		CLTC	LCP2	controls-state-change-of	Pathway Commons		TREM2	CNTRL	controls-state-change-of	Pathway Commons		IGHG2	VAV3	controls-state-change-of	Pathway Commons		MET	CD79A	controls-state-change-of	Pathway Commons
GNG2	FCGR1A	controls-state-change-of	Pathway Commons		GNG8	IGLV2-14	controls-state-change-of	Pathway Commons		GNG2	BLNK	controls-state-change-of	Pathway Commons		STRN	TXK	controls-state-change-of	Pathway Commons		STAT3	WASF2	controls-state-change-of	Pathway Commons		ERBB3	LAT	controls-state-change-of	Pathway Commons		IGKC	GNGT2	controls-state-change-of	Pathway Commons		PIK3CG	CD3G	controls-state-change-of	Pathway Commons
ERLIN2	IGLV1-51	controls-state-change-of	Pathway Commons		GNG2	KLB	controls-state-change-of	Pathway Commons		EGF	HSP90AA1	in-complex-with	Pathway Commons		PIK3R4	ERLIN2	controls-state-change-of	Pathway Commons		UBE2E1	ANAPC5	in-complex-with	Pathway Commons		SOS1	GNG7	controls-state-change-of	Pathway Commons		BDNF	PTN	controls-state-change-of	Pathway Commons		INPP5D	CD28	controls-state-change-of	Pathway Commons
EPOR	IGLV6-57	controls-state-change-of	Pathway Commons		RHOG	IGLV3-25	controls-state-change-of	Pathway Commons		NTRK2	BLNK	controls-state-change-of	Pathway Commons		GNB5	NCK1	controls-state-change-of	Pathway Commons		GRB2	FCGR2A	controls-state-change-of	Pathway Commons		INPPL1	GNB1	controls-state-change-of	Pathway Commons		GRAP2	VAV1	controls-state-change-of	Pathway Commons		FGF2	TXK	controls-state-change-of	Pathway Commons
HGF	IGHV3-33	controls-state-change-of	Pathway Commons		GNG8	FGFR1OP2	controls-state-change-of	Pathway Commons		TRIM24	CD247	controls-state-change-of	Pathway Commons		FCGR3A	VAV3	controls-state-change-of	Pathway Commons		STAT3	FCGR2A	controls-state-change-of	Pathway Commons		AXL	MYO18A	controls-state-change-of	Pathway Commons		HCK	GNB5	controls-state-change-of	Pathway Commons		PDGFA	TEC	controls-state-change-of	Pathway Commons
FGF7	IGLC2	controls-state-change-of	Pathway Commons		PDGFA	GNB4	controls-state-change-of	Pathway Commons		CD247	VAV3	controls-state-change-of	Pathway Commons		TRIM24	AKT2	controls-state-change-of	Pathway Commons		MYD88	GNB2	controls-state-change-of	Pathway Commons		INPPL1	FGF2	controls-state-change-of	Pathway Commons		PIK3CB	IGHG4	controls-state-change-of	Pathway Commons		FN1	BAIAP2	controls-state-change-of	Pathway Commons
IGHV1-2	CD80	controls-state-change-of	Pathway Commons		PDGFA	IGHV4-59	controls-state-change-of	Pathway Commons		OXCT1	SDHC	catalysis-precedes	Pathway Commons		TYROBP	GNB5	controls-state-change-of	Pathway Commons		EML4	WASF2	controls-state-change-of	Pathway Commons		CSF1R	SYK	controls-state-change-of	Pathway Commons		NTRK3	INPP5K	catalysis-precedes	Pathway Commons		EREG	GRAP2	controls-state-change-of	Pathway Commons
IL1RL1	IGLV3-1	controls-state-change-of	Pathway Commons		CD3G	IGHV3-33	controls-state-change-of	Pathway Commons		LDHA	PC	catalysis-precedes	Pathway Commons		CDC37	PIK3CA	in-complex-with	Pathway Commons		CLTC	RHOA	controls-state-change-of	Pathway Commons		PIP5K1A	HBEGF	catalysis-precedes	Pathway Commons		CNTRL	ABI1	controls-state-change-of	Pathway Commons		GNG11	TXK	controls-state-change-of	Pathway Commons
TREM2	IGHV4-34	controls-state-change-of	Pathway Commons		IGLV2-8	GNG7	controls-state-change-of	Pathway Commons		FN1	BRK1	controls-state-change-of	Pathway Commons		SHC1	FCGR3A	controls-state-change-of	Pathway Commons		RAC2	LCP2	controls-state-change-of	Pathway Commons		PLCG2	FGFR1OP2	controls-state-change-of	Pathway Commons		PIK3R5	TEC	controls-state-change-of	Pathway Commons		CD19	MYO18A	controls-state-change-of	Pathway Commons
GRAP2	VAV1	controls-state-change-of	Pathway Commons		GNG8	AKT2	controls-state-change-of	Pathway Commons		TREM2	FGF2	controls-state-change-of	Pathway Commons		PIP4K2A	TYROBP	catalysis-precedes	Pathway Commons		SDHB	SDHD	in-complex-with	Pathway Commons		IL33	FCGR2A	controls-state-change-of	Pathway Commons		AREG	CYFIP1	controls-state-change-of	Pathway Commons		EPOR	CD79B	controls-state-change-of	Pathway Commons
KLRC2	ITK	controls-state-change-of	Pathway Commons		KIT	NCKAP1L	controls-state-change-of	Pathway Commons		GNG4	LCP2	controls-state-change-of	Pathway Commons		MYD88	ABI2	controls-state-change-of	Pathway Commons		CDC37	FGFR1OP2	controls-state-change-of	Pathway Commons		PIK3CG	FGF2	controls-state-change-of	Pathway Commons		GRAP2	FCGR3A	controls-state-change-of	Pathway Commons		HCK	FGF7	controls-state-change-of	Pathway Commons
FLT3	VAV1	controls-state-change-of	Pathway Commons		MDK	SH3KBP1	controls-state-change-of	Pathway Commons		CD247	LAT2	controls-state-change-of	Pathway Commons		TNRC6C	AGO1	in-complex-with	Pathway Commons		IRAK1	SH3KBP1	controls-state-change-of	Pathway Commons		IGKC	GRB2	controls-state-change-of	Pathway Commons		PIK3CD	NCK1	controls-state-change-of	Pathway Commons		GNG11	PLCG1	controls-state-change-of	Pathway Commons
IGKV2-29	LCP2	controls-state-change-of	Pathway Commons		LAT2	IGLV3-21	controls-state-change-of	Pathway Commons		SYK	FGF20	controls-state-change-of	Pathway Commons		GNG2	LAT	controls-state-change-of	Pathway Commons		CLTC	WASF2	controls-state-change-of	Pathway Commons		STAT3	CD79B	controls-state-change-of	Pathway Commons		GNG7	LCP2	controls-state-change-of	Pathway Commons		PIP4K2B	HCK	catalysis-precedes	Pathway Commons
IGLV3-21	FYN	controls-state-change-of	Pathway Commons		B2M	ITK	controls-state-change-of	Pathway Commons		IRAK1	FCGR2A	controls-state-change-of	Pathway Commons		IRAK4	SOS1	controls-state-change-of	Pathway Commons		STAT3	LRRFIP1	controls-state-change-of	Pathway Commons		FGFR1OP2	LCK	controls-state-change-of	Pathway Commons		IGHG4	FGF7	controls-state-change-of	Pathway Commons		CD247	GNG12	controls-state-change-of	Pathway Commons
IGKV4-1	LCK	controls-state-change-of	Pathway Commons		IGLV3-21	MYO18A	controls-state-change-of	Pathway Commons		LAT2	GNB5	controls-state-change-of	Pathway Commons		MDH1	NQO1	catalysis-precedes	Pathway Commons		CPSF6	FCGR3A	controls-state-change-of	Pathway Commons		LAT2	AKT3	controls-state-change-of	Pathway Commons		EML4	CD28	controls-state-change-of	Pathway Commons		HGF	INPP5J	catalysis-precedes	Pathway Commons
AREG	ERLIN2	controls-state-change-of	Pathway Commons		IGLV3-19	ITK	controls-state-change-of	Pathway Commons		TREM2	CD247	controls-state-change-of	Pathway Commons		PRR5	MAPKAP1	in-complex-with	Pathway Commons		MYD88	RAC1	controls-state-change-of	Pathway Commons		PIK3AP1	NCKAP1L	controls-state-change-of	Pathway Commons		GNB3	IGHG3	controls-state-change-of	Pathway Commons		KLRC2	FGF2	controls-state-change-of	Pathway Commons
EPOR	IGHV1-2	controls-state-change-of	Pathway Commons		CNTRL	IGLV2-8	controls-state-change-of	Pathway Commons		AXL	CYFIP1	controls-state-change-of	Pathway Commons		PIK3R1	ATIC	controls-state-change-of	Pathway Commons		GNB2	ABI1	controls-state-change-of	Pathway Commons		GAB2	IGKC	controls-state-change-of	Pathway Commons		IGLC2	MDK	controls-state-change-of	Pathway Commons		GRIN2D	HRAS	controls-state-change-of	Pathway Commons
IGLV2-8	CD28	controls-state-change-of	Pathway Commons		JAK2	IGLC7	controls-state-change-of	Pathway Commons		GNG12	VAV3	controls-state-change-of	Pathway Commons		LCK	AKT3	controls-state-change-of	Pathway Commons		TYROBP	WASF2	controls-state-change-of	Pathway Commons		HSP90AA1	KRAS	controls-state-change-of	Pathway Commons		AREG	SYK	controls-state-change-of	Pathway Commons		PDGFRB	CD3G	controls-state-change-of	Pathway Commons
FLT3	ERLIN2	controls-state-change-of	Pathway Commons		TYROBP	IGLV1-51	controls-state-change-of	Pathway Commons		PIP5K1B	TRIM24	catalysis-precedes	Pathway Commons		STAT1	GNB1	controls-state-change-of	Pathway Commons		B2M	BAIAP2	controls-state-change-of	Pathway Commons		GNB1	BTK	controls-state-change-of	Pathway Commons		GRB2	PLCG2	controls-state-change-of	Pathway Commons		FCGR2A	MDK	controls-state-change-of	Pathway Commons
TYROBP	FGFR4	controls-state-change-of	Pathway Commons		IGLC7	INPP5K	catalysis-precedes	Pathway Commons		IRAK1	WASF2	controls-state-change-of	Pathway Commons		KLRK1	VAV3	controls-state-change-of	Pathway Commons		PIK3AP1	RHOA	controls-state-change-of	Pathway Commons		IGKC	MDK	controls-state-change-of	Pathway Commons		FN1	TXK	controls-state-change-of	Pathway Commons		GNG11	MDK	controls-state-change-of	Pathway Commons
HCK	IGHV3-48	controls-state-change-of	Pathway Commons		IGHG1	IGKV3-20	controls-state-change-of	Pathway Commons		GNB5	CD247	controls-state-change-of	Pathway Commons		SPTAN1	NRAS	controls-state-change-of	Pathway Commons		VEGFA	TFG	controls-state-change-of	Pathway Commons		PIK3R1	CD86	controls-state-change-of	Pathway Commons		IGHG1	NCKAP1L	controls-state-change-of	Pathway Commons		FN1	FGF9	controls-state-change-of	Pathway Commons
LCK	IGLV1-47	controls-state-change-of	Pathway Commons		IGHG2	INPP5D	catalysis-precedes	Pathway Commons		KITLG	GNB5	controls-state-change-of	Pathway Commons		ERLIN2	LCP2	controls-state-change-of	Pathway Commons		EML4	GNG5	controls-state-change-of	Pathway Commons		TREM2	NCK1	controls-state-change-of	Pathway Commons		FCGR3A	DAPP1	controls-state-change-of	Pathway Commons		GNG12	CD28	controls-state-change-of	Pathway Commons
IGKV3-11	PTN	controls-state-change-of	Pathway Commons		IGHV3-33	LAT	controls-state-change-of	Pathway Commons		TREM2	FCGR2A	controls-state-change-of	Pathway Commons		CNTRL	TFG	controls-state-change-of	Pathway Commons		FGFR1OP2	LCP2	controls-state-change-of	Pathway Commons		STRN	CNTRL	controls-state-change-of	Pathway Commons		IGHG1	CNTRL	controls-state-change-of	Pathway Commons		AREG	CD3G	controls-state-change-of	Pathway Commons
IGHV2-5	GRAP2	controls-state-change-of	Pathway Commons		IRS2	AKT3	controls-state-change-of	Pathway Commons		FN1	CD86	controls-state-change-of	Pathway Commons		EPOR	CD28	controls-state-change-of	Pathway Commons		STAT3	NPM1	controls-state-change-of	Pathway Commons		PIK3R5	FCGR2A	controls-state-change-of	Pathway Commons		RAC2	NCKAP1L	controls-state-change-of	Pathway Commons		GNB5	SOS1	controls-state-change-of	Pathway Commons
ERLIN2	IGLV2-11	controls-state-change-of	Pathway Commons		MYO18A	FGFR1	controls-state-change-of	Pathway Commons		FGF20	CD86	controls-state-change-of	Pathway Commons		JAK2	ZMYM2	controls-state-change-of	Pathway Commons		GNB1	BAIAP2	controls-state-change-of	Pathway Commons		FGFR1	FCGR2A	controls-state-change-of	Pathway Commons		MDK	CD247	controls-state-change-of	Pathway Commons		CD247	CD79A	controls-state-change-of	Pathway Commons
TRAT1	ERLIN2	controls-state-change-of	Pathway Commons		AREG	DAPP1	controls-state-change-of	Pathway Commons		CD247	GNG4	controls-state-change-of	Pathway Commons		TYROBP	CD3G	controls-state-change-of	Pathway Commons		RHOG	GRB2	controls-state-change-of	Pathway Commons		FCGR2A	CPSF6	controls-state-change-of	Pathway Commons		PDGFA	FCGR3A	controls-state-change-of	Pathway Commons		GRAP2	FGF10	controls-state-change-of	Pathway Commons
GRAP2	FCGR3A	controls-state-change-of	Pathway Commons		PIK3R1	NRG1	in-complex-with	Pathway Commons		MYD88	LAT2	controls-state-change-of	Pathway Commons		PIK3CG	CD3G	controls-state-change-of	Pathway Commons		FGFR1OP2	NPM1	controls-state-change-of	Pathway Commons		STAT1	BAG4	controls-state-change-of	Pathway Commons		ZMYM2	DAPP1	controls-state-change-of	Pathway Commons		INPP5D	FGFR1	controls-state-change-of	Pathway Commons
IGHG4	FGF7	controls-state-change-of	Pathway Commons		PIK3R2	GNG8	controls-state-change-of	Pathway Commons		HLA-E	FCGR2A	controls-state-change-of	Pathway Commons		FLT3LG	KRAS	controls-state-change-of	Pathway Commons		GRB2	RHOA	controls-state-change-of	Pathway Commons		STAT3	FCGR3A	controls-state-change-of	Pathway Commons		FCGR1A	CYFIP2	controls-state-change-of	Pathway Commons		KIT	TXK	controls-state-change-of	Pathway Commons
IGKV2-29	CD28	controls-state-change-of	Pathway Commons		CD19	IGHG3	controls-state-change-of	Pathway Commons		FGFR3	BCR	controls-state-change-of	Pathway Commons		ZMYM2	TFG	controls-state-change-of	Pathway Commons		PIP4K2A	KIF5B	catalysis-precedes	Pathway Commons		DLG1	NRAS	controls-state-change-of	Pathway Commons		GNB5	CD28	controls-state-change-of	Pathway Commons		TGFA	MDK	controls-state-change-of	Pathway Commons
IL1RL1	GNG2	controls-state-change-of	Pathway Commons		ESR2	GRAP2	controls-state-change-of	Pathway Commons		FGFR3	CYFIP1	controls-state-change-of	Pathway Commons		EREG	GRAP2	controls-state-change-of	Pathway Commons		RAC2	GNB2	controls-state-change-of	Pathway Commons		HCK	AKT2	controls-state-change-of	Pathway Commons		GNG10	IGHG1	controls-state-change-of	Pathway Commons		PTN	FGFR2	controls-state-change-of	Pathway Commons
FN1	TXK	controls-state-change-of	Pathway Commons		RAC2	CD247	controls-state-change-of	Pathway Commons		CD86	VAV3	controls-state-change-of	Pathway Commons		KLRK1	SH3KBP1	controls-state-change-of	Pathway Commons		HLA-E	ZMYM2	controls-state-change-of	Pathway Commons		HSP90AA1	NRAS	controls-state-change-of	Pathway Commons		RAC1	FGF20	controls-state-change-of	Pathway Commons		IRAK4	AKT2	controls-state-change-of	Pathway Commons
IGKV1-33	LCP2	controls-state-change-of	Pathway Commons		RAC2	IGHV3-30	controls-state-change-of	Pathway Commons		PIP5K1B	PLCG2	catalysis-precedes	Pathway Commons		B2M	PDPK1	controls-state-change-of	Pathway Commons		IRS2	FCGR3A	controls-state-change-of	Pathway Commons		PIK3CG	GNB1	controls-state-change-of	Pathway Commons		PDGFRB	VAV3	controls-state-change-of	Pathway Commons		FGF7	CYFIP2	controls-state-change-of	Pathway Commons
IGLV6-57	LCP2	controls-state-change-of	Pathway Commons		IGLC6	MDK	controls-state-change-of	Pathway Commons		NTRK3	CYFIP1	controls-state-change-of	Pathway Commons		PIK3C3	CD28	controls-state-change-of	Pathway Commons		MDH2	CS	catalysis-precedes	Pathway Commons		PIK3AP1	FGFR1OP2	controls-state-change-of	Pathway Commons		PIK3R5	INPP5K	catalysis-precedes	Pathway Commons		CSF1R	FGF10	controls-state-change-of	Pathway Commons
IL34	IGHV3-48	controls-state-change-of	Pathway Commons		AXL	CD247	controls-state-change-of	Pathway Commons		GAB3	BLNK	controls-state-change-of	Pathway Commons		SH2D2A	GNG7	controls-state-change-of	Pathway Commons		IL1RAP	WASF2	controls-state-change-of	Pathway Commons		PTN	CD79B	controls-state-change-of	Pathway Commons		PDGFRA	CD79B	controls-state-change-of	Pathway Commons		INPP5D	CD247	controls-state-change-of	Pathway Commons
IL1RL1	FGF7	controls-state-change-of	Pathway Commons		CD86	SH3KBP1	controls-state-change-of	Pathway Commons		INPP5D	GNB5	controls-state-change-of	Pathway Commons		TRAT1	SHC1	controls-state-change-of	Pathway Commons		HCK	RAC1	controls-state-change-of	Pathway Commons		PIP5K1B	TYROBP	catalysis-precedes	Pathway Commons		TREM2	TXK	controls-state-change-of	Pathway Commons		KLRC2	GNG12	controls-state-change-of	Pathway Commons
FYN	IGKV2-30	controls-state-change-of	Pathway Commons		GNG2	IGHV4-59	controls-state-change-of	Pathway Commons		FCGR1A	PLCG2	controls-state-change-of	Pathway Commons		HLA-E	CD28	controls-state-change-of	Pathway Commons		TYROBP	CPSF6	controls-state-change-of	Pathway Commons		DVL2	GNG7	catalysis-precedes	Pathway Commons		ESR1	FCGR2A	controls-state-change-of	Pathway Commons		FGFR4	CD247	controls-state-change-of	Pathway Commons
GNG4	IGKV2D-28	controls-state-change-of	Pathway Commons		GNGT2	IGKV1-12	controls-state-change-of	Pathway Commons		JAK2	BAIAP2	controls-state-change-of	Pathway Commons		PIK3CA	NCK1	controls-state-change-of	Pathway Commons		LRRFIP1	LCP2	controls-state-change-of	Pathway Commons		CBL	FGF2	controls-state-change-of	Pathway Commons		DVL1	PLCG2	catalysis-precedes	Pathway Commons		EGFR	CD28	controls-state-change-of	Pathway Commons
KLRC2	FGF7	controls-state-change-of	Pathway Commons		IGKV1-39	GNG10	controls-state-change-of	Pathway Commons		CAMK2A	KRAS	controls-state-change-of	Pathway Commons		GAB3	RAC1	controls-state-change-of	Pathway Commons		CSF1R	GNB2	controls-state-change-of	Pathway Commons		SHC1	GNG7	controls-state-change-of	Pathway Commons		VAV1	GNG11	controls-state-change-of	Pathway Commons		PIK3CD	FCGR3A	controls-state-change-of	Pathway Commons
GNG2	IGLV1-44	controls-state-change-of	Pathway Commons		PIK3R5	CYFIP2	controls-state-change-of	Pathway Commons		FCGR2A	VAV3	controls-state-change-of	Pathway Commons		PIP4K2B	HCK	catalysis-precedes	Pathway Commons		MYD88	GNG5	controls-state-change-of	Pathway Commons		SOS1	PTEN	catalysis-precedes	Pathway Commons		RAC1	LCP2	controls-state-change-of	Pathway Commons		IRAK4	GRAP2	controls-state-change-of	Pathway Commons
FGF1	FYN	controls-state-change-of	Pathway Commons		DCTN1	FGFR1	controls-state-change-of	Pathway Commons		FGFR3	PLCG2	controls-state-change-of	Pathway Commons		PIP4K2B	STRN	catalysis-precedes	Pathway Commons		IRS2	BAIAP2	controls-state-change-of	Pathway Commons		MYD88	PLCG2	controls-state-change-of	Pathway Commons		FN1	GNG2	controls-state-change-of	Pathway Commons		MET	GNG2	controls-state-change-of	Pathway Commons
FGF7	IGHV3-23	controls-state-change-of	Pathway Commons		ESR2	LAT2	controls-state-change-of	Pathway Commons		AXL	TRIM24	controls-state-change-of	Pathway Commons		MYD88	SH3KBP1	controls-state-change-of	Pathway Commons		IL1RAP	LRRFIP1	controls-state-change-of	Pathway Commons		VEGFA	LAT2	controls-state-change-of	Pathway Commons		DVL1	STRN	catalysis-precedes	Pathway Commons		KLRD1	FCGR3A	controls-state-change-of	Pathway Commons
GNG4	IGLV1-51	controls-state-change-of	Pathway Commons		KDR	LAT2	controls-state-change-of	Pathway Commons		CSF1R	GNB5	controls-state-change-of	Pathway Commons		IL1RAP	CNTRL	controls-state-change-of	Pathway Commons		GNG5	NCKAP1L	controls-state-change-of	Pathway Commons		KLRK1	FCGR1A	controls-state-change-of	Pathway Commons		CD28	DAPP1	controls-state-change-of	Pathway Commons		FN1	FGF18	controls-state-change-of	Pathway Commons
IGKV3-20	FGFR4	controls-state-change-of	Pathway Commons		LYN	SH3KBP1	controls-state-change-of	Pathway Commons		HLA-E	CYFIP1	controls-state-change-of	Pathway Commons		STRN	RAC1	controls-state-change-of	Pathway Commons		ACO2	ACLY	catalysis-precedes	Pathway Commons		HSP90AA1	SHC1	controls-state-change-of	Pathway Commons		PDGFRB	VAV2	controls-state-change-of	Pathway Commons		NTRK2	CYFIP2	controls-state-change-of	Pathway Commons
IGKV1-39	FGFR4	controls-state-change-of	Pathway Commons		IGKV1-39	SHC1	controls-state-change-of	Pathway Commons		GAB3	GNG2	controls-state-change-of	Pathway Commons		CNTRL	INPP5K	catalysis-precedes	Pathway Commons		IL1RAP	FGFR1OP2	controls-state-change-of	Pathway Commons		PIK3R1	NCK1	controls-state-change-of	Pathway Commons		GNG2	IGHG4	controls-state-change-of	Pathway Commons		THOC5	CD28	controls-state-change-of	Pathway Commons
GNG2	FGFR4	controls-state-change-of	Pathway Commons		PIK3AP1	LAT	controls-state-change-of	Pathway Commons		CD247	BRK1	controls-state-change-of	Pathway Commons		CLTC	SYK	controls-state-change-of	Pathway Commons		HBEGF	FCGR2A	controls-state-change-of	Pathway Commons		LAT2	SOS1	controls-state-change-of	Pathway Commons		TREM2	GNG10	controls-state-change-of	Pathway Commons		FCGR3A	INPP5D	catalysis-precedes	Pathway Commons
RAC2	IGLV3-21	controls-state-change-of	Pathway Commons		GNG8	IGHD	controls-state-change-of	Pathway Commons		PIK3AP1	CD86	controls-state-change-of	Pathway Commons		AREG	CD3G	controls-state-change-of	Pathway Commons		HADHB	CS	catalysis-precedes	Pathway Commons		AXL	INPP5D	catalysis-precedes	Pathway Commons		LCK	FGF1	controls-state-change-of	Pathway Commons		GNG11	MYO18A	controls-state-change-of	Pathway Commons
EPGN	CD247	controls-state-change-of	Pathway Commons		FN1	ABI1	controls-state-change-of	Pathway Commons		STAT3	GNG4	controls-state-change-of	Pathway Commons		GNB5	SOS1	controls-state-change-of	Pathway Commons		EREG	NRAS	controls-state-change-of	Pathway Commons		SHC1	NCK1	controls-state-change-of	Pathway Commons		PDGFB	VAV1	controls-state-change-of	Pathway Commons		IRS1	FGF9	controls-state-change-of	Pathway Commons
TREM2	TXK	controls-state-change-of	Pathway Commons		GRAP2	INPP5K	catalysis-precedes	Pathway Commons		HBEGF	BRK1	controls-state-change-of	Pathway Commons		CD247	FYN	controls-state-change-of	Pathway Commons		CUX1	NPM1	controls-state-change-of	Pathway Commons		VEGFA	CYFIP2	controls-state-change-of	Pathway Commons		RAC2	LAT	controls-state-change-of	Pathway Commons		PC	NME6	catalysis-precedes	Pathway Commons
ESR1	FCGR2A	controls-state-change-of	Pathway Commons		IGHV3-33	BTK	controls-state-change-of	Pathway Commons		STAT3	VAV3	controls-state-change-of	Pathway Commons		SH2D2A	CNTRL	controls-state-change-of	Pathway Commons		CLTC	BAIAP2	controls-state-change-of	Pathway Commons		FGF2	INPPL1	catalysis-precedes	Pathway Commons		PDGFB	GNG7	controls-state-change-of	Pathway Commons		FGFR2	GRAP2	controls-state-change-of	Pathway Commons
MYD88	IGLV1-51	controls-state-change-of	Pathway Commons		KLRD1	GNG8	controls-state-change-of	Pathway Commons		FCGR1A	GNG4	controls-state-change-of	Pathway Commons		HLA-E	GNG10	controls-state-change-of	Pathway Commons		B2M	FGFR1OP2	controls-state-change-of	Pathway Commons		PIK3R1	CD79A	controls-state-change-of	Pathway Commons		RHOG	TXK	controls-state-change-of	Pathway Commons		KLRK1	FGFR3	controls-state-change-of	Pathway Commons
CD247	IGKV2D-28	controls-state-change-of	Pathway Commons		CD19	ITK	controls-state-change-of	Pathway Commons		GNG4	VAV2	controls-state-change-of	Pathway Commons		PIK3C3	GNB1	controls-state-change-of	Pathway Commons		CUX1	LAT2	controls-state-change-of	Pathway Commons		VEGFA	CD79A	controls-state-change-of	Pathway Commons		VEGFA	LCK	controls-state-change-of	Pathway Commons		THOC5	MDK	controls-state-change-of	Pathway Commons
GNG4	CD247	controls-state-change-of	Pathway Commons		AREG	GNG7	controls-state-change-of	Pathway Commons		PIK3R4	CD86	controls-state-change-of	Pathway Commons		PIP4K2A	PIK3CG	catalysis-precedes	Pathway Commons		ZMYM2	ABI1	controls-state-change-of	Pathway Commons		FN1	SYK	controls-state-change-of	Pathway Commons		PIK3CD	IGHG4	controls-state-change-of	Pathway Commons		PIP4K2B	SOS1	catalysis-precedes	Pathway Commons
IGLC3	LAT	controls-state-change-of	Pathway Commons		EPOR	IGLV2-11	controls-state-change-of	Pathway Commons		HSP90AA1	TRIM24	controls-state-change-of	Pathway Commons		GNG7	LAT	controls-state-change-of	Pathway Commons		CDC26	ANAPC16	in-complex-with	Pathway Commons		FGFR1	GAB2	controls-state-change-of	Pathway Commons		FCGR3A	GNG10	controls-state-change-of	Pathway Commons		KIT	FGFR3	controls-state-change-of	Pathway Commons
IGHG3	IGHV3-23	controls-state-change-of	Pathway Commons		IGLV2-11	GNG8	controls-state-change-of	Pathway Commons		TREM2	CD86	controls-state-change-of	Pathway Commons		PIK3C3	FCGR3A	controls-state-change-of	Pathway Commons		GNG5	TFG	controls-state-change-of	Pathway Commons		FGF2	PLCG2	controls-state-change-of	Pathway Commons		SH2D2A	INPP5K	catalysis-precedes	Pathway Commons		FCGR2A	CD247	controls-state-change-of	Pathway Commons
FN1	GNG2	controls-state-change-of	Pathway Commons		FGFR1OP2	IGLC6	controls-state-change-of	Pathway Commons		PLCG2	LCK	controls-state-change-of	Pathway Commons		PIK3R4	LAT	controls-state-change-of	Pathway Commons		HSP90AA1	LRRFIP1	controls-state-change-of	Pathway Commons		BAG4	LCP2	controls-state-change-of	Pathway Commons		BDNF	CPSF6	controls-state-change-of	Pathway Commons		SOS1	MDK	controls-state-change-of	Pathway Commons
IGLV2-11	FYN	controls-state-change-of	Pathway Commons		CD3G	IGHV4-34	controls-state-change-of	Pathway Commons		TRIM24	FGFR3	controls-state-change-of	Pathway Commons		CDC37	CD3G	controls-state-change-of	Pathway Commons		ANAPC5	ANAPC16	in-complex-with	Pathway Commons		PIK3R5	NCK1	controls-state-change-of	Pathway Commons		GNB5	CNTRL	controls-state-change-of	Pathway Commons		FGFR4	GNG11	controls-state-change-of	Pathway Commons
PDGFRB	IGLC1	controls-state-change-of	Pathway Commons		IGLC7	FYN	controls-state-change-of	Pathway Commons		TREM2	BCR	controls-state-change-of	Pathway Commons		STRN	CD28	controls-state-change-of	Pathway Commons		RHOG	LAT2	controls-state-change-of	Pathway Commons		EML4	VAV1	controls-state-change-of	Pathway Commons		PIK3CB	CD247	controls-state-change-of	Pathway Commons		NTRK2	AKT2	controls-state-change-of	Pathway Commons
IGHV4-39	VAV1	controls-state-change-of	Pathway Commons		GNGT2	IGLV1-51	controls-state-change-of	Pathway Commons		HLA-E	GNB4	controls-state-change-of	Pathway Commons		IRAK4	AKT2	controls-state-change-of	Pathway Commons		STAT1	TFG	controls-state-change-of	Pathway Commons		EML4	CD86	controls-state-change-of	Pathway Commons		KLRD1	IGHG1	controls-state-change-of	Pathway Commons		SH2D2A	BAIAP2	controls-state-change-of	Pathway Commons
IGLC1	FGF1	controls-state-change-of	Pathway Commons		IRAK4	IGLV7-43	controls-state-change-of	Pathway Commons		GAB3	VAV2	controls-state-change-of	Pathway Commons		TRAF6	GNB1	controls-state-change-of	Pathway Commons		IRS2	NRAS	controls-state-change-of	Pathway Commons		IGKC	PTEN	catalysis-precedes	Pathway Commons		FCGR2A	VAV2	controls-state-change-of	Pathway Commons		CSF1R	CD79A	controls-state-change-of	Pathway Commons
GAB3	IGKV2-28	controls-state-change-of	Pathway Commons		IGHG3	GNB4	controls-state-change-of	Pathway Commons		GNG2	BTK	controls-state-change-of	Pathway Commons		TYROBP	TRIM24	controls-state-change-of	Pathway Commons		CDC37	WASF2	controls-state-change-of	Pathway Commons		STAT3	IGKC	controls-state-change-of	Pathway Commons		GNG10	ABI1	controls-state-change-of	Pathway Commons		FCGR2A	GNG2	controls-state-change-of	Pathway Commons
PDGFRB	IGHM	controls-state-change-of	Pathway Commons		AXL	PLCG2	controls-state-change-of	Pathway Commons		CD247	FGF20	controls-state-change-of	Pathway Commons		GAB3	ITK	controls-state-change-of	Pathway Commons		HLA-E	SH3KBP1	controls-state-change-of	Pathway Commons		SYK	GNB1	controls-state-change-of	Pathway Commons		IGKC	FGF1	controls-state-change-of	Pathway Commons		GRAP2	FGF18	controls-state-change-of	Pathway Commons
LCK	IGLC1	controls-state-change-of	Pathway Commons		GNG7	IGHV4-39	controls-state-change-of	Pathway Commons		FGF2	VAV2	controls-state-change-of	Pathway Commons		CS	PDHB	catalysis-precedes	Pathway Commons		LDHA	MPC1	catalysis-precedes	Pathway Commons		PIK3R5	VAV1	controls-state-change-of	Pathway Commons		GNB3	NCKAP1L	controls-state-change-of	Pathway Commons		TRAT1	CYFIP2	controls-state-change-of	Pathway Commons
GNG2	IGHG4	controls-state-change-of	Pathway Commons		TYROBP	IGLV3-21	controls-state-change-of	Pathway Commons		KITLG	GNB2	controls-state-change-of	Pathway Commons		PIK3CD	FCGR3A	controls-state-change-of	Pathway Commons		LRRFIP1	NCKAP1L	controls-state-change-of	Pathway Commons		IGKC	LAT	controls-state-change-of	Pathway Commons		HGF	NCK1	controls-state-change-of	Pathway Commons		BDNF	CD79A	controls-state-change-of	Pathway Commons
FYN	IGLV1-40	controls-state-change-of	Pathway Commons		PIK3R2	MDK	controls-state-change-of	Pathway Commons		PIP5K1B	FCGR2A	catalysis-precedes	Pathway Commons		IRAK4	GRAP2	controls-state-change-of	Pathway Commons		EML4	FCGR3A	controls-state-change-of	Pathway Commons		CD3G	NCKAP1L	controls-state-change-of	Pathway Commons		DVL1	GNG2	catalysis-precedes	Pathway Commons		IRAK4	CD79A	controls-state-change-of	Pathway Commons
LCK	FGF1	controls-state-change-of	Pathway Commons		IRAK4	IGLC6	controls-state-change-of	Pathway Commons		INPP5D	TRIM24	controls-state-change-of	Pathway Commons		KLRD1	FCGR3A	controls-state-change-of	Pathway Commons		LAT2	TFG	controls-state-change-of	Pathway Commons		INPP5D	LCK	controls-state-change-of	Pathway Commons		PIK3CB	BLNK	controls-state-change-of	Pathway Commons		FCGR3A	GRAP2	controls-state-change-of	Pathway Commons
AREG	IGHV1-69	controls-state-change-of	Pathway Commons		CD80	IGHM	controls-state-change-of	Pathway Commons		BCR	GNG12	controls-state-change-of	Pathway Commons		CNTRL	LCP2	controls-state-change-of	Pathway Commons		CUX1	RHOA	controls-state-change-of	Pathway Commons		KLRD1	IGHD	controls-state-change-of	Pathway Commons		GNG10	NCK1	controls-state-change-of	Pathway Commons		AREG	PLCG1	controls-state-change-of	Pathway Commons
RAC2	LAT	controls-state-change-of	Pathway Commons		LCK	IGLV2-11	controls-state-change-of	Pathway Commons		STAT3	VAV2	controls-state-change-of	Pathway Commons		IRS2	TRIM24	controls-state-change-of	Pathway Commons		AREG	NRAS	controls-state-change-of	Pathway Commons		IRAK1	LCP2	controls-state-change-of	Pathway Commons		IRS1	GNB5	controls-state-change-of	Pathway Commons		HBEGF	FGF18	controls-state-change-of	Pathway Commons
VEGFA	LCK	controls-state-change-of	Pathway Commons		FN1	GAB1	controls-state-change-of	Pathway Commons		FGF20	BAIAP2	controls-state-change-of	Pathway Commons		LCK	ABI2	controls-state-change-of	Pathway Commons		SDHD	SUCLG1	catalysis-precedes	Pathway Commons		FCGR2A	PTEN	catalysis-precedes	Pathway Commons		GNG10	FGF7	controls-state-change-of	Pathway Commons		KLRK1	AKT2	controls-state-change-of	Pathway Commons
IGLV3-1	FGF1	controls-state-change-of	Pathway Commons		GNB5	INPP5K	catalysis-precedes	Pathway Commons		EREG	LCP2	controls-state-change-of	Pathway Commons		GNG10	CD28	controls-state-change-of	Pathway Commons		HCK	TFG	controls-state-change-of	Pathway Commons		IGKC	DAPP1	controls-state-change-of	Pathway Commons		IGHG1	FGF7	controls-state-change-of	Pathway Commons		BTC	SOS1	controls-state-change-of	Pathway Commons
[truncated: 7,099 more rows]

## Sheet: Table 4
Table 4. Positive TF sets
Breast cancer				Colorectal cancer				Glioblastoma				Leukemia				Lung cancer				Melanoma				Ovarian cancer				Pancreatic cancer
Name	Source	Count		Name	Source	Count		Name	Source	Count		Name	Source	Count		Name	Source	Count		Name	Source	Count		Name	Source	Count		Name	Source	Count
[truncated: 218 more rows]

## Sheet: Table 5
Table 5. Positive target genes
[truncated: 4,367 more rows]

## Sheet: Table 6
Table 6. Secreted and membrane-bound ligands annotated from HPA
[truncated: 5,574 more rows]

[truncated: 2 more sheets: Table 7, Table 8]
